# Supplementary material for: Structural plasticity of dendritic secretory compartments during LTP-induced synaptogenesis
Source: eLife journal article supplement (doi:10.7554/elife.46356), 2019-08-21
Supplement: supp [file elife-46356-supp-v1.zip]

Archive with 18 entries (18 files):
- elife_poa_e46356_Figure_4_figure_supplement_2.pdf
- elife_poa_e46356_Figure_4_video_3.avi
- elife_poa_e46356_Figure_5_figure_supplement_2.pdf
- elife_poa_e46356_Figure_4_video_1.avi
- elife_poa_e46356_Figure_4_figure_supplement_1.pdf
- elife_poa_e46356_Figure_4_figure_supplement_3.pdf
- elife_poa_e46356_Figure_4_figure_supplement_5.pdf
- elife_poa_e46356_Figure_4_figure_supplement_6.pdf
- elife_poa_e46356_Figure_3_source_data_1.xlsx
- elife_poa_e46356_Figure_5_figure_supplement_1.pdf
- elife_poa_e46356_Transparent_Reporting_File.docx
- elife_poa_e46356_Figure_4_figure_supplement_4.pdf
- elife_poa_e46356_Figure_4_source_data_1.xlsx
- elife_poa_e46356_Figure_4_video_2.avi
- elife_poa_e46356_Figure_1_source_data_1.xlsx
- elife_poa_e46356_Figure_5_source_data_1.xlsx
- elife_poa_e46356_Figure_2_figure_supplement_1.pdf
- elife_poa_e46356_Figure_2_source_data_1.xlsx
