# Supplementary material for: Structural plasticity of dendritic secretory compartments during LTP-induced synaptogenesis
Source: eLife journal article supplement (doi:10.7554/elife.46356), 2019-08-21
Supplement: supp [file elife-46356-supp-v1.zip › elife_poa_e46356_Figure_1_source_data_1.xlsx]

## Sheet: Fig1_graphs
Experiment: GC046												Experiment: GC048														Raw						Formulas
Stim 1 - (TBS)						Stim 2 - (Control)						Stim 1 (control)					Stim 2 (LTP)									GC046	GC048	GC046	GC048			Mean	Mean		Standard Error	Standard Error
Time	Slope	Percent Baseline	Percent BL	Time (relTBS)		Time	Slope	Percent Baseline	Percent Baseline	Time (relTBS)		Time	Slope	Percent Baseline	Percent BL	Time (relTBS)	Time	Slope	Percent Baseline		Time (relTBS)					Control	Control	TBS	TBS			CTRL	LTP	100 line	CTRL	TBS
0.4	-0.855853	80.9569	I/O	I/O		0.41	-0.0017864	0.213417	I/O	I/O		0.37	-0.574368	32.5682	I/O	I/O	0.38	-3.42469	87.5129	I/O	I/O				-40	86.6269	94.1882	69.3054	105.222		-40	90.4075	87.2639	100	3.78065	17.9585
0.59	-0.688613	65.1373	I/O	I/O		0.6	-0.101739	12.1546	I/O	I/O		1.56	-1.41772	80.3882	I/O	I/O	1.57	-3.67666	93.9515	I/O	I/O				-38	71.4235	113.632	54.4433	104.216		-38	92.5276	79.3297	100	21.1041	24.8863
0.69	-1.44349	136.543	I/O	I/O		0.7	-0.178299	21.301	I/O	I/O		1.92	-0.0681382	3.86361	I/O	I/O	1.98	-1.14168	29.1739	I/O	I/O				-36	89.1981	116.381	115.099	94.6732		-36	102.79	104.886	100	13.5915	10.2127
1.86	-0.879162	83.1617	I/O	I/O		1.87	-0.207817	24.8275	I/O	I/O		2.2	-0.906298	51.3894	I/O	I/O	2.23	-2.18816	55.9153	I/O	I/O				-34	93.1107	112.546	87.0482	104.164		-34	102.829	95.606	100	9.71783	8.55781
2.09	-0.654246	61.8864	I/O	I/O		2.1	-0.529624	63.273	I/O	I/O		2.49	-1.219	69.1205	I/O	I/O	2.64	-3.15537	80.6308	I/O	I/O				-32	96.251	86.0172	70.6492	96.3731		-32	91.1341	83.5112	100	5.11689	12.8619
2.2	-0.876354	82.8961	I/O	I/O		2.21	-0.337629	40.3358	I/O	I/O		2.97	-1.92548	109.18	I/O	I/O	3.01	-3.70481	94.6711	I/O	I/O				-30	91.82	116.15	126.308	99.3903		-30	103.985	112.849	100	12.1647	13.4587
3.47	-0.98005	92.705	I/O	I/O		3.48	-0.911402	108.883	I/O	I/O		3.24	-2.26932	128.676	I/O	I/O	3.28	-4.01445	102.584	I/O	I/O				-28	89.8891	109.59	60.5588	100.664		-28	99.7393	80.6114	100	9.85022	20.0527
3.81	-0.0689038	6.51775	I/O	I/O		3.87	0.0590361	-7.05292	I/O	I/O		3.51	-2.91284	165.166	I/O	I/O	3.56	-4.56058	116.539	I/O	I/O				-26	66.5149	92.8858	65.7971	103.133		-26	79.7004	84.4653	100	13.1855	18.6682
4.12	-0.301816	28.5494	I/O	I/O		4.04	-0.069159	8.26228	I/O	I/O		3.76	-3.13555	177.794	I/O	I/O	3.8	-5.00982	128.019	I/O	I/O				-24	101.79	105.075	83.0812	111.809		-24	103.432	97.445	100	1.64256	14.3638
4.36	-0.716429	67.7685	I/O	I/O		4.16	-0.187827	22.4393	I/O	I/O		4.06	-3.29199	186.664	I/O	I/O	4.11	-5.13793	131.292	I/O	I/O				-22	80.9764	98.9972	108.999	103.186		-22	89.9868	106.092	100	9.01037	2.90684
4.74	-0.608735	57.5815	I/O	I/O		4.51	-0.225936	26.9921	I/O	I/O		4.36	-3.47471	197.025	I/O	I/O	4.4	-5.19951	132.866	I/O	I/O				-20	94.6351	112.04	111.92	105.285		-20	103.337	108.603	100	8.70239	3.31738
5.08	-0.930627	88.0299	I/O	I/O		4.78	-0.492024	58.7811	I/O	I/O		4.65	-3.31393	187.908	I/O	I/O	4.75	-5.06264	129.368	I/O	I/O				-18	121.932	110.496	101.178	90.9322		-18	116.214	96.0551	100	5.71788	5.12291
5.36	-0.848538	80.2649	I/O	I/O		5.12	-0.464548	55.4985	I/O	I/O		5	-2.8493	161.563	I/O	I/O	5.04	-4.491	114.761	I/O	I/O				-16	111.332	99.248	114.165	101.627		-16	105.29	107.896	100	6.0422	6.26911
5.6	-0.738717	69.8767	I/O	I/O		5.39	-0.731061	87.3383	I/O	I/O		5.33	-2.53098	143.513	I/O	I/O	5.38	-4.04771	103.433	I/O	I/O				-14	119.402	101.124	107.406	99.8815		-14	110.263	103.644	100	9.13864	3.76229
5.83	-1.15665	109.41	I/O	I/O		5.64	-0.790267	94.4115	I/O	I/O		5.61	-2.34435	132.93	I/O	I/O	5.66	-3.67904	94.0124	I/O	I/O				-12	110.245	104.149	100.808	106.27		-12	107.197	103.539	100	3.04817	2.73114
6.09	-1.35171	127.861	I/O	I/O		5.86	-1.08043	129.077	I/O	I/O		5.86	-1.68755	95.6883	I/O	I/O	5.91	-3.4104	87.1477	I/O	I/O				-10	86.759	91.7909	115.678	93.5472		-10	89.275	104.613	100	2.51595	11.0654
6.52	-1.30824	123.749	I/O	I/O		6.14	-1.32568	158.376	I/O	I/O		6.16	-1.06716	60.5106	I/O	I/O	6.22	-3.10697	79.394	I/O	I/O				-8	70.1938	80.5618	91.7233	101.271		-8	75.3778	96.4969	100	5.18402	4.77364
6.99	-1.33103	125.905	I/O	I/O		6.56	-1.22547	146.404	I/O	I/O		6.45	-0.668452	37.9029	I/O	I/O	6.49	-1.88133	48.0746	I/O	I/O				-6	95.062	117.027	99.0859	103.214		-6	106.045	101.15	100	10.9827	2.064
7.3	-1.16601	110.295	I/O	I/O		7.03	-1.36344	162.888	I/O	I/O		6.76	-0.125303	7.10499	I/O	I/O	6.82	-0.600484	15.3445	I/O	I/O				-4	93.7103	92.9775	89.6472	106.281		-4	93.3439	97.9641	100	0.366409	8.3169
7.58	-1.1814	111.751	I/O	I/O		7.33	-0.953765	113.944	I/O	I/O		7.29	-1.30645	74.0791	I/O	I/O	7.2	-0.443962	11.3448	I/O	I/O				-2	80.1431	103.464	69.5066	94.182		-2	91.8034	81.8443	100	11.6603	12.3377
8.95	-0.906212	85.7205	I/O	I/O		7.61	-0.814766	97.3384	I/O	I/O		7.61	-1.67504	94.9792	I/O	I/O	7.31	-2.57921	65.908	I/O	I/O				0	111.221	99.1612	110.802	102.794		0	105.191	106.798	100	6.02972	4.0037
9.24	-0.731486	69.1927	I/O	I/O		8.98	-1.06997	127.826	I/O	I/O		7.91	-1.51631	85.9786	85.9786	-102	7.62	-3.19314	81.596	I/O	I/O				8		108.292		182.569		8	108.292	182.569	100
9.55	-0.904852	85.5918	I/O	I/O		9.29	-0.901194	107.664	I/O	I/O		9.86	-1.81311	102.808	102.808	-100	8.39	-2.93249	74.9356	74.9356	-102				10		95.8137		197.957		10	95.8137	197.957	100
9.83	-0.337629	31.937	I/O	I/O		9.58	-0.540427	64.5637	I/O	I/O		11.82	-1.83335	103.956	103.956	-98	10.35	-2.84947	72.814	72.814	-100				12		88.6267		202.08		12	88.6267	202.08	100
10.17	-0.211135	19.9717	I/O	I/O		9.87	-0.604142	72.1755	I/O	I/O		13.78	-1.76572	100.121	100.121	-96	12.31	-3.41746	87.3281	87.3281	-98				14	152.105	111.842	121.278	207.306		14	131.974	164.292	100	20.1315	43.0138
10.67	-0.809407	76.5635	I/O	I/O		10.21	-0.456296	54.5128	I/O	I/O		15.74	-1.93798	109.889	109.889	-94	14.27	-3.25396	83.1502	83.1502	-96				16	132.847	103.247	125.495	218.12		16	118.047	171.808	100	14.8001	46.3127
11.06	-0.745097	70.4802	I/O	I/O		10.7	-0.645314	77.0943	I/O	I/O		17.7	-2.07468	117.64	117.64	-92	16.23	-3.41831	87.3499	87.3499	-94				18	120.093	105.48	181.177	208.91		18	112.786	195.044	100	7.30635	13.8664
11.29	-0.885371	83.7491	83.7491	-46		11.09	-0.593679	70.9255	I/O	I/O		19.66	-1.87155	106.121	106.121	-90	18.19	-3.49589	89.3323	89.3323	-92				20	150.581	91.3182	167.056	208.339		20	120.95	187.697	100	29.6313	20.6415
13.24	-0.780655	73.8437	73.8437	-44		11.77	-0.450937	53.8725	53.8725	-46		21.62	-2.17745	123.467	123.467	-88	20.15	-3.52252	90.0127	90.0127	-90				22	139.615	92.3311	183.656	195.813		22	115.973	189.735	100	23.6421	6.07882
15.2	-0.600144	56.7688	56.7688	-42		13.73	-0.470502	56.2099	56.2099	-44		23.58	-2.23342	126.641	126.641	-86	22.11	-3.60103	92.0191	92.0191	-88				24	139.951	97.8589	189.272	207.017		24	118.905	198.145	100	21.0459	8.8723
17.16	-0.732677	69.3054	69.3054	-40		15.69	-0.351409	41.9821	41.9821	-42		25.54	-2.35617	133.601	133.601	-84	24.07	-3.5927	91.8061	91.8061	-86				26	117.054	120.631	160.152	203.132		26	118.842	181.642	100	1.78825	21.4904
19.12	-0.575559	54.4433	54.4433	-38		17.65	-0.725106	86.6269	86.6269	-40		27.5	-2.10778	119.516	119.516	-82	26.03	-3.6542	93.3777	93.3777	-84				28	77.5109	106.131	190.069	205.769		28	91.821	197.919	100	14.3101	7.85013
21.08	-1.21679	115.099	115.099	-36		19.61	-0.597847	71.4235	71.4235	-38		29.46	-2.23742	126.867	126.867	-80	27.99	-3.90497	99.7859	99.7859	-82				30	115.489	110.68	158.18	205.154		30	113.084	181.667	100	2.40464	23.4869
23.04	-0.920249	87.0482	87.0482	-34		21.57	-0.746628	89.1981	89.1981	-36		31.42	-2.43596	138.125	138.125	-78	29.95	-3.98255	101.768	101.768	-80				32	127.522	111.215	171.441	217.173		32	119.368	194.307	100	8.15327	22.8658
25	-0.746883	70.6492	70.6492	-32		23.53	-0.779379	93.1107	93.1107	-34		33.38	-2.11866	120.134	120.134	-76	31.91	-4.04457	103.353	103.353	-78				34	140.042	102.885	178.297	210.73		34	121.463	194.513	100	18.5786	16.2165
26.96	-1.33529	126.308	126.308	-30		25.49	-0.805664	96.251	96.251	-32		35.34	-2.28829	129.752	129.752	-74	33.87	-3.84168	98.1686	98.1686	-76				36	108.477	114.321	175.834	200.274		36	111.399	188.054	100	2.92235	12.2197
28.92	-0.64021	60.5588	60.5588	-28		27.45	-0.768575	91.82	91.82	-30		37.3	-2.59393	147.083	147.083	-72	35.83	-3.80255	97.1687	97.1687	-74				38	164.361	114.78	173.943	214.59		38	139.571	194.267	100	24.7909	20.3234
30.88	-0.695588	65.7971	65.7971	-26		29.41	-0.752412	89.8891	89.8891	-28		39.26	-2.37837	134.86	134.86	-70	37.79	-4.22295	107.911	107.911	-72				40	101.942	97.4633	161.793	203.706		40	99.7027	182.75	100	2.23939	20.9566
32.84	-0.878311	83.0812	83.0812	-24		31.37	-0.55676	66.5149	66.5149	-26		41.22	-2.60992	147.989	147.989	-68	39.75	-4.05018	103.496	103.496	-70				42	63.4254	105.943	149.707	214.229		42	84.6842	181.968	100	21.2588	32.2611
34.8	-1.15231	108.999	108.999	-22		33.33	-0.852025	101.79	101.79	-24		43.18	-2.82863	160.391	160.391	-66	41.71	-3.89085	99.425	99.425	-68				44	102.45	98.8428	188.942	212.527		44	100.647	200.735	100	1.80369	11.7925
36.76	-1.18319	111.92	111.92	-20		35.29	-0.677809	80.9764	80.9764	-22		45.15	-2.50946	142.293	142.293	-64	43.67	-4.2728	109.185	109.185	-66				46	81.0577	111.972	165.664	217.462		46	96.5151	191.563	100	15.4573	25.8991
38.72	-1.06963	101.178	101.178	-18		37.25	-0.792139	94.6351	94.6351	-20		47.11	-2.69269	152.683	152.683	-62	45.64	-4.00203	102.266	102.266	-64				48	71.271	104.79	187.832	205.204		48	88.0306	196.518	100	16.7596	8.68604
40.68	-1.20692	114.165	114.165	-16		39.21	-1.02063	121.932	121.932	-18		49.07	-2.52724	143.301	143.301	-60	47.6	-3.81361	97.4513	97.4513	-62				50	101.769	118.629	178.908	203.028		50	110.199	190.968	100	8.42972	12.0599
42.64	-1.13547	107.406	107.406	-14		41.17	-0.931903	111.332	111.332	-16		51.03	-2.77546	157.376	157.376	-58	49.56	-4.28616	109.526	109.526	-60				52	126.18	94.8249	178.369	205.482		52	110.503	191.926	100	15.6776	13.5565
44.6	-1.06571	100.808	100.808	-12		43.13	-0.999445	119.402	119.402	-14		52.99	-2.53183	143.561	143.561	-56	51.52	-4.22882	108.061	108.061	-58				54	113.345	125.835	157.617	206.328		54	119.59	181.972	100	6.2452	24.3554
46.56	-1.22291	115.678	115.678	-10		45.09	-0.9228	110.245	110.245	-12		54.95	-2.6454	150.001	150.001	-54	53.48	-4.33456	110.763	110.763	-56				56	97.1453	94.0194	176.864	205.341		56	95.5823	191.103	100	1.56297	14.2382
48.52	-0.969672	91.7233	91.7233	-8		47.05	-0.726212	86.759	86.759	-10		56.91	-2.84454	161.292	161.293	-52	55.44	-4.33618	110.805	110.805	-54				58	68.893	113.825	187.824	205.634		58	91.3588	196.729	100	22.4658	8.90524
50.48	-1.04751	99.0859	99.0859	-6		49.01	-0.587554	70.1938	70.1938	-8		58.87	-2.93045	166.164	166.164	-50	57.4	-4.23818	108.3	108.3	-52				60	116.769	87.9514	150.166	207.547		60	102.36	178.857	100	14.409	28.6907
52.44	-0.947725	89.6472	89.6472	-4		50.97	-0.795711	95.062	95.0619	-6		60.83	-2.96746	168.262	168.262	-48	59.36	-4.32716	110.574	110.574	-50				62	118.487	114.143	182.714	212.819		62	116.315	197.766	100	2.17202	15.0522
54.41	-0.734804	69.5066	69.5066	-2		52.93	-0.784397	93.7103	93.7103	-4		62.79	-2.69252	152.673	152.673	-46	61.32	-4.61987	118.054	118.054	-48				64	78.3341	106.975	178.9	216.131		64	92.6547	197.516	100	14.3206	18.6156
56.37	-1.17136	110.802	110.802	0		54.9	-0.670834	80.1431	80.1431	-2		64.75	-2.83943	161.003	161.003	-44	63.28	-4.31015	110.139	110.139	-46				66	145.306	117.63	223.454	204.224		66	131.468	213.839	100	13.838	9.61532
70.85	-1.28212	121.278	121.278	14		56.86	-0.930967	111.221	111.221	0		66.71	-2.87856	163.222	163.222	-42	65.24	-4.6186	118.021	118.021	-44				68	102.867	108.799	196.015	202.689		68	105.833	199.352	100	2.9658	3.33682
72.8	-1.3267	125.495	125.495	16		71.33	-1.27319	152.105	152.105	14		67.87	-1.66109	94.1882	94.1882	-40	67.2	-4.3645	111.528	111.528	-42				70	132.369	115.026	214.289	215.442		70	123.697	214.866	100	8.67179	0.576585
74.76	-1.91536	181.177	181.177	18		73.29	-1.11199	132.847	132.847	16		69.82	-2.00399	113.632	113.632	-38	68.35	-4.11772	105.222	105.222	-40				72	97.8872	117.572	216.502	211.584		72	107.73	214.043	100	9.84263	2.45903
76.72	-1.76606	167.056	167.056	20		75.25	-1.00523	120.093	120.093	18		71.78	-2.05248	116.381	116.381	-36	70.31	-4.07834	104.216	104.216	-38				74	78.2122	96.0693	166.557	203.171		74	87.1408	184.864	100	8.92858	18.3074
78.68	-1.94156	183.656	183.656	22		77.21	-1.26043	150.581	150.581	20		73.74	-1.98485	112.546	112.546	-34	72.27	-3.7049	94.6732	94.6732	-36				76	87.2875	106.531	186.488	210.325		76	96.9095	198.407	100	9.62201	11.9186
80.64	-2.00093	189.272	189.272	24		79.17	-1.16864	139.615	139.615	22		75.7	-1.51699	86.0172	86.0172	-32	74.23	-4.0763	104.164	104.164	-34				78	98.9543	109.363	211.079	209.445		78	104.159	210.262	100	5.2043	0.81682
82.6	-1.69308	160.152	160.152	26		81.13	-1.17145	139.951	139.951	24		77.66	-2.0484	116.15	116.15	-30	76.19	-3.77142	96.3731	96.3731	-32				80	112.501	101.148	177.806	207.539		80	106.825	192.672	100	5.67633	14.8664
84.56	-2.00935	190.069	190.069	28		83.09	-0.979795	117.054	117.054	26		79.62	-1.93271	109.59	109.59	-28	78.15	-3.88949	99.3903	99.3903	-30				82	107.684	97.8782	154.704	203.115		82	102.781	178.91	100	4.90294	24.2055
86.53	-1.67224	158.18	158.18	30		85.05	-0.648802	77.5109	77.5109	28		81.58	-1.63812	92.8858	92.8858	-26	80.11	-3.93934	100.664	100.664	-28				84	115.052	101.592	197.432	200.015		84	108.322	198.723	100	6.72988	1.29185
88.49	-1.81242	171.441	171.441	32		87.02	-0.966695	115.489	115.489	30		83.54	-1.85309	105.075	105.075	-24	82.07	-4.03598	103.133	103.133	-26				86	111.332	116.386	161.946	215.762		86	113.859	188.854	100	2.52671	26.9079
90.45	-1.8849	178.297	178.297	34		90.94	-1.06741	127.522	127.522	32		85.5	-1.7459	98.9972	98.9972	-22	84.03	-4.37548	111.809	111.809	-24				88	96.2916	135.873	181.073	208.289		88	116.082	194.681	100	19.7906	13.6079
92.41	-1.85887	175.834	175.834	36		92.9	-1.17222	140.042	140.042	34		87.46	-1.97592	112.04	112.04	-20	85.99	-4.03802	103.186	103.186	-22				90	119.31	120.867	165.792	195.82		90	120.089	180.806	100	0.778365	15.0138
94.37	-1.83888	173.943	173.943	38		94.86	-0.907999	108.477	108.477	36		89.42	-1.9487	110.496	110.496	-18	87.95	-4.12019	105.285	105.285	-20				92	95.5802	131.083	190.68	203.174		92	113.332	196.927	100	17.7514	6.24662
96.33	-1.71043	161.793	161.793	40		96.82	-1.37578	164.361	164.361	38		91.38	-1.75033	99.248	99.248	-16	89.91	-3.5585	90.9322	90.9322	-18				94	91.9522	124.856	200.425	210.319		94	108.404	205.372	100	16.4519	4.94696
98.29	-1.58266	149.707	149.707	42		98.78	-0.853301	101.942	101.942	40		93.34	-1.78342	101.124	101.124	-14	91.87	-3.97702	101.627	101.627	-16				96	39.3703	114.394	254.924	203.658		96	76.882	229.291	100	37.5117	25.633
100.25	-1.99744	188.942	188.942	44		100.74	-0.5309	63.4254	63.4254	42		95.3	-1.83675	104.149	104.149	-12	93.83	-3.90872	99.8815	99.8815	-14				98	96.4339	135.564	216.566	193.72		98	115.999	205.143	100	19.5651	11.4232
102.21	-1.75135	165.664	165.664	46		102.7	-0.857555	102.45	102.45	44		97.26	-1.61881	91.7909	91.7909	-10	95.79	-4.15873	106.27	106.27	-12				100	71.8402	133.215	218.626	203.471		100	102.528	211.049	100	30.6874	7.5774
104.17	-1.98571	187.832	187.832	48		104.66	-0.67849	81.0577	81.0577	46		99.22	-1.42078	80.5618	80.5618	-8	97.75	-3.66083	93.5472	93.5472	-10				102	100.834	134.382	236.031	218.827		102	117.608	227.429	100	16.774	8.60214
106.13	-1.89137	178.908	178.908	50		106.62	-0.596571	71.271	71.271	48		101.18	-2.06388	117.027	117.027	-6	99.71	-3.96307	101.271	101.271	-8				104	77.1857	124.938	185.764	200.291		104	101.062	193.028	100	23.8761	7.26367
108.09	-1.88567	178.369	178.369	52		108.58	-0.851855	101.769	101.769	50		103.14	-1.63974	92.9775	92.9775	-4	101.67	-4.03912	103.214	103.214	-6				106	123.324	154.704	180.679	203.584		106	139.014	192.132	100	15.6896	11.453
110.05	-1.66628	157.617	157.617	54		110.54	-1.05618	126.18	126.18	52		105.1	-1.82467	103.464	103.464	-2	103.63	-4.15915	106.281	106.281	-4				108	90.3465	137.074	165.551	205.052		108	113.71	185.301	100	23.3637	19.7505
112.01	-1.86976	176.864	176.864	56		112.5	-0.948746	113.345	113.345	54		107.06	-1.7488	99.1612	99.1612	0	105.59	-3.68567	94.182	94.182	-2				110	78.6898	124.827	153.521	191.433		110	101.758	172.477	100	23.0686	18.956
113.97	-1.98562	187.824	187.824	58		114.46	-0.81315	97.1453	97.1453	56		114.88	-1.90983	108.292	108.292	8	107.55	-4.02271	102.794	102.794	0				112	62.0433	151.337	194.108	195.655		112	106.69	194.881	100	44.6467	0.77321
115.93	-1.58751	150.166	150.166	60		116.42	-0.576665	68.893	68.893	58		116.82	-1.68976	95.8137	95.8137	10	115.35	-7.14456	182.569	182.569	8				114	92.2571	127.668	187.084	202.863		114	109.963	194.973	100	17.7055	7.88963
117.89	-1.9316	182.714	182.714	62		118.38	-0.977413	116.769	116.769	60		118.78	-1.56301	88.6267	88.6267	12	117.31	-7.74674	197.957	197.957	10				116	54.0961	130.958	163.692	188.836		116	92.5268	176.264	100	38.4308	12.5718
119.85	-1.89128	178.9	178.9	64		120.34	-0.991789	118.487	118.487	62		120.74	-1.97244	111.842	111.842	14	119.27	-7.90811	202.08	202.08	12				118	137.227	114.321	216.727	188.068		118	125.774	202.398	100	11.4528	14.3295
121.81	-2.36229	223.454	223.454	66		122.3	-0.655692	78.3341	78.3341	64		122.71	-1.82085	103.247	103.247	16	121.23	-8.11261	207.306	207.306	14				120	79.4215	132.766	199.218	178.949		120	106.094	189.084	100	26.6724	10.1342
123.77	-2.07222	196.015	196.015	68		124.26	-1.21628	145.306	145.306	66		124.67	-1.86023	105.48	105.48	18	123.2	-8.53582	218.12	218.12	16
125.73	-2.2654	214.289	214.289	70		126.22	-0.861042	102.867	102.867	68		126.63	-1.61048	91.3182	91.3182	20	125.16	-8.17539	208.91	208.91	18
127.69	-2.2888	216.502	216.502	72		128.18	-1.10799	132.369	132.369	70		128.59	-1.62834	92.3311	92.3311	22	127.12	-8.15302	208.339	208.338	20
129.65	-1.76079	166.557	166.557	74		130.14	-0.81936	97.8872	97.8872	72		130.55	-1.72583	97.8589	97.8589	24	129.08	-7.66287	195.813	195.813	22
131.61	-1.9715	186.488	186.488	76		132.1	-0.654671	78.2122	78.2122	74		132.51	-2.12743	120.631	120.631	26	131.04	-8.1013	207.017	207.017	24
133.57	-2.23146	211.079	211.079	78		134.06	-0.730635	87.2875	87.2875	76		134.47	-1.87172	106.131	106.131	28	133	-7.94929	203.132	203.132	26
135.53	-1.87971	177.806	177.806	80		136.03	-0.828292	98.9543	98.9543	78		136.43	-1.95193	110.68	110.68	30	134.96	-8.05247	205.769	205.769	28
137.5	-1.63549	154.704	154.704	82		137.99	-0.941685	112.501	112.501	80		138.39	-1.96138	111.215	111.215	32	136.92	-8.0284	205.154	205.154	30
139.46	-2.08719	197.432	197.432	84		139.95	-0.901364	107.684	107.684	82		140.35	-1.81447	102.885	102.885	34	138.88	-8.49873	217.173	217.173	32
141.42	-1.71205	161.946	161.946	86		141.91	-0.963037	115.052	115.052	84		142.31	-2.01616	114.321	114.321	36	140.84	-8.24659	210.73	210.73	34
143.38	-1.91425	181.073	181.073	88		143.87	-0.931903	111.332	111.332	86		144.27	-2.02424	114.78	114.78	38	142.8	-7.83742	200.274	200.274	36
145.34	-1.75271	165.792	165.792	90		145.83	-0.806004	96.2916	96.2916	88		146.23	-1.71885	97.4633	97.4633	40	144.76	-8.39767	214.59	214.59	38
147.3	-2.01582	190.68	190.68	92		147.79	-0.99868	119.31	119.31	90		148.19	-1.8684	105.943	105.943	42	146.72	-7.97174	203.706	203.706	40
149.26	-2.11883	200.425	200.425	94		149.75	-0.80005	95.5802	95.5802	92		150.15	-1.74318	98.8428	98.8428	44	148.68	-8.38355	214.229	214.229	42
151.22	-2.69499	254.924	254.925	96		151.71	-0.769681	91.9522	91.9522	94		152.11	-1.97473	111.972	111.972	46	150.64	-8.31694	212.527	212.527	44
153.18	-2.28948	216.566	216.566	98		153.67	-0.329547	39.3703	39.3703	96		154.07	-1.84807	104.79	104.79	48	152.6	-8.51005	217.462	217.462	46
155.14	-2.31125	218.626	218.626	100		155.63	-0.807195	96.4339	96.4339	98		156.03	-2.09212	118.629	118.629	50	154.56	-8.03036	205.204	205.204	48
157.1	-2.49525	236.031	236.031	102		157.59	-0.601335	71.8402	71.8402	100		157.99	-1.67232	94.8249	94.8249	52	156.52	-7.9452	203.028	203.028	50
159.06	-1.96384	185.764	185.764	104		159.55	-0.844029	100.834	100.834	102		159.95	-2.21921	125.835	125.835	54	158.48	-8.04124	205.482	205.482	52
161.02	-1.91008	180.679	180.679	106		161.51	-0.646079	77.1857	77.1857	104		161.91	-1.65811	94.0194	94.0194	56	160.44	-8.07433	206.328	206.328	54
162.98	-1.75016	165.551	165.551	108		163.47	-1.03228	123.324	123.324	106		163.87	-2.0074	113.825	113.825	58	162.4	-8.03571	205.341	205.341	56
164.94	-1.62298	153.521	153.521	110		165.43	-0.75624	90.3465	90.3464	108		165.83	-1.5511	87.9514	87.9514	60	164.36	-8.0472	205.634	205.634	58
166.9	-2.05206	194.108	194.108	112		167.39	-0.658669	78.6898	78.6898	110		167.79	-2.01301	114.143	114.143	62	166.32	-8.12206	207.547	207.547	60
168.86	-1.97779	187.084	187.084	114		169.35	-0.519331	62.0433	62.0433	112		169.76	-1.8866	106.975	106.975	64	168.28	-8.32834	212.819	212.819	62
170.82	-1.73051	163.692	163.692	116		171.31	-0.772233	92.2571	92.257	114		171.72	-2.07451	117.63	117.63	66	170.24	-8.45798	216.131	216.131	64
172.78	-2.29118	216.727	216.727	118		173.27	-0.452809	54.0961	54.0961	116		173.68	-1.91876	108.799	108.799	68	172.21	-7.99199	204.224	204.224	66
174.74	-2.10607	199.218	199.218	120		175.23	-1.14865	137.227	137.227	118		175.64	-2.02858	115.026	115.026	70	174.17	-7.93193	202.689	202.689	68
176.7	-2.01548	190.648	190.648			177.19	-0.664794	79.4215	79.4215	120		177.6	-2.07349	117.572	117.572	72	176.13	-8.43102	215.442	215.442	70
178.66	-2.27629	215.319	215.319			179.15	-0.744161	88.9033	88.9033			179.56	-1.69427	96.0693	96.0693	74	178.09	-8.28003	211.584	211.584	72
180.62	-2.09212	197.898	197.898			181.11	-1.03109	123.182	123.182			181.52	-1.87878	106.531	106.531	76	180.05	-7.95082	203.171	203.171	74
182.58	-1.84943	174.941	174.941			183.07	-0.942196	112.562	112.562			183.48	-1.92871	109.363	109.363	78	182.01	-8.23077	210.325	210.325	76
184.54	-2.56016	242.171	242.171			185.04	-0.829142	99.0559	99.0559			185.44	-1.78384	101.148	101.148	80	183.97	-8.19632	209.445	209.445	78
186.51	-2.07494	196.273	196.273			187	-1.03305	123.416	123.416			187.4	-1.72617	97.8782	97.8781	82	185.93	-8.12172	207.539	207.539	80
								123.416				189.36	-1.79167	101.592	101.592	84	187.89	-7.94861	203.115	203.115	82
												191.32	-2.05257	116.386	116.386	86	189.85	-7.8273	200.015	200.015	84
Baseline	-1.05717						-0.837045					193.28	-2.39624	135.873	135.873	88	191.81	-8.44352	215.762	215.762	86
												195.24	-2.13159	120.867	120.867	90	193.77	-8.15106	208.289	208.289	88
												197.2	-2.31176	131.083	131.083	92	195.73	-7.66312	195.82	195.82	90
												199.16	-2.20194	124.856	124.856	94	197.69	-7.9509	203.174	203.174	92
												201.12	-2.01744	114.394	114.394	96	199.65	-8.23052	210.319	210.319	94
												203.08	-2.39079	135.564	135.564	98	201.61	-7.96987	203.658	203.658	96
												205.04	-2.34936	133.215	133.215	100	203.57	-7.58095	193.72	193.72	98
												207	-2.36995	134.382	134.382	102	205.53	-7.96256	203.471	203.471	100
												208.96	-2.20339	124.938	124.938	104	207.49	-8.56347	218.827	218.827	102
												210.92	-2.72834	154.704	154.704	106	209.45	-7.8381	200.291	200.291	104
												212.88	-2.41742	137.074	137.074	108	211.41	-7.96698	203.584	203.585	106
												214.84	-2.20143	124.827	124.827	110	213.37	-8.0244	205.052	205.052	108
												216.8	-2.66896	151.337	151.337	112	215.33	-7.49146	191.433	191.433	110
												218.76	-2.25154	127.668	127.668	114	217.29	-7.65666	195.655	195.655	112
												220.73	-2.30955	130.958	130.958	116	219.25	-7.93874	202.863	202.863	114
												222.69	-2.01616	114.321	114.321	118	221.22	-7.38981	188.836	188.836	116
												224.65	-2.34145	132.766	132.766	120	223.18	-7.35978	188.068	188.068	118
												226.61	-2.3594	133.784	133.784		225.14	-7.00292	178.949	178.949	120
												228.57	-2.27561	129.033	129.033		227.1	-7.5533	193.014	193.014
												230.53	-2.16724	122.888	122.888		229.06	-8.06191	206.01	206.01
														122.888			231.02	-6.93283	177.158	177.158
																			177.158
												Baseline	-1.76359					-3.91335

## Sheet: Fig1_waves
GC048slice1_p15	2 hour slice_P15	Waveforms	S1 - Control	S2 - TBS		* = Edited to remove the 2nd stim artifact
(10 us/point) - 5ms pre-pulse	S1 pre (volts)	S1 post (volts)	S2 pre (volts)	S2 post (volts)		(10 us/point)	S1 pre edit (volts)	S1 post edit (volts)	S2 pre edit (volts)	S2 post edit (volts)
1	5.49e-06	1.43e-06	4.37e-06	-1.75e-06		1	5.49e-06	1.43e-06	4.37e-06	-1.75e-06
2	6.65e-06	2.63e-06	3.21e-06	-2.55e-06		2	6.65e-06	2.63e-06	3.21e-06	-2.55e-06
3	5.49e-06	2.47e-06	3.21e-06	-2.31e-06		3	5.49e-06	2.47e-06	3.21e-06	-2.31e-06
4	5.96e-06	3.35e-06	2.28e-06	-2.71e-06		4	5.96e-06	3.35e-06	2.28e-06	-2.71e-06
5	5.03e-06	2.15e-06	2.04e-06	-2.47e-06		5	5.03e-06	2.15e-06	2.04e-06	-2.47e-06
6	4.56e-06	2.47e-06	1.11e-06	-2.47e-06		6	4.56e-06	2.47e-06	1.11e-06	-2.47e-06
7	5.26e-06	1.67e-06	1.35e-06	-2.23e-06		7	5.26e-06	1.67e-06	1.35e-06	-2.23e-06
8	5.49e-06	2.23e-06	6.48e-07	-2.31e-06		8	5.49e-06	2.23e-06	6.48e-07	-2.31e-06
9	5.49e-06	2.47e-06	6.48e-07	-1.75e-06		9	5.49e-06	2.47e-06	6.48e-07	-1.75e-06
10	5.72e-06	2.31e-06	-4.94e-08	-1.91e-06		10	5.72e-06	2.31e-06	-4.94e-08	-1.91e-06
11	5.96e-06	2.23e-06	-7.47e-07	-2.07e-06		11	5.96e-06	2.23e-06	-7.47e-07	-2.07e-06
12	5.49e-06	1.75e-06	-7.47e-07	-2.31e-06		12	5.49e-06	1.75e-06	-7.47e-07	-2.31e-06
13	5.03e-06	2.39e-06	-1.21e-06	-2.95e-06		13	5.03e-06	2.39e-06	-1.21e-06	-2.95e-06
14	4.1e-06	2.47e-06	-9.79e-07	-3.43e-06		14	4.1e-06	2.47e-06	-9.79e-07	-3.43e-06
15	5.26e-06	2.71e-06	-2.84e-06	-3.67e-06		15	5.26e-06	2.71e-06	-2.84e-06	-3.67e-06
16	5.26e-06	3.03e-06	-2.37e-06	-3.27e-06		16	5.26e-06	3.03e-06	-2.37e-06	-3.27e-06
17	5.96e-06	3.67e-06	-4.47e-06	-3.67e-06		17	5.96e-06	3.67e-06	-4.47e-06	-3.67e-06
18	5.72e-06	3.19e-06	-2.84e-06	-3.51e-06		18	5.72e-06	3.19e-06	-2.84e-06	-3.51e-06
19	6.19e-06	3.83e-06	-3.3e-06	-3.59e-06		19	6.19e-06	3.83e-06	-3.3e-06	-3.59e-06
20	5.72e-06	3.03e-06	-2.84e-06	-3.35e-06		20	5.72e-06	3.03e-06	-2.84e-06	-3.35e-06
21	5.96e-06	3.59e-06	-4.7e-06	-3.59e-06		21	5.96e-06	3.59e-06	-4.7e-06	-3.59e-06
22	6.42e-06	2.79e-06	-4.23e-06	-3.35e-06		22	6.42e-06	2.79e-06	-4.23e-06	-3.35e-06
23	8.05e-06	3.43e-06	-4.47e-06	-3.51e-06		23	8.05e-06	3.43e-06	-4.47e-06	-3.51e-06
24	7.35e-06	3.35e-06	-4.7e-06	-3.43e-06		24	7.35e-06	3.35e-06	-4.7e-06	-3.43e-06
25	8.51e-06	3.19e-06	-3.54e-06	-3.35e-06		25	8.51e-06	3.19e-06	-3.54e-06	-3.35e-06
26	8.75e-06	3.19e-06	-2.84e-06	-3.99e-06		26	8.75e-06	3.19e-06	-2.84e-06	-3.99e-06
27	8.51e-06	3.67e-06	-1.91e-06	-3.27e-06		27	8.51e-06	3.67e-06	-1.91e-06	-3.27e-06
28	9.45e-06	3.99e-06	-2.84e-06	-3.99e-06		28	9.45e-06	3.99e-06	-2.84e-06	-3.99e-06
29	9.45e-06	3.43e-06	-5.14e-07	-4.07e-06		29	9.45e-06	3.43e-06	-5.14e-07	-4.07e-06
30	1.04e-05	3.75e-06	-1.68e-06	-3.99e-06		30	1.04e-05	3.75e-06	-1.68e-06	-3.99e-06
31	1.01e-05	3.27e-06	6.48e-07	-3.43e-06		31	1.01e-05	3.27e-06	6.48e-07	-3.43e-06
32	1.01e-05	4.31e-06	-2.82e-07	-3.99e-06		32	1.01e-05	4.31e-06	-2.82e-07	-3.99e-06
33	9.91e-06	3.83e-06	8.81e-07	-3.91e-06		33	9.91e-06	3.83e-06	8.81e-07	-3.91e-06
34	9.91e-06	4.47e-06	-9.79e-07	-3.43e-06		34	9.91e-06	4.47e-06	-9.79e-07	-3.43e-06
35	9.68e-06	3.35e-06	4.16e-07	-3.11e-06		35	9.68e-06	3.35e-06	4.16e-07	-3.11e-06
36	1.04e-05	3.59e-06	-5.14e-07	-3.51e-06		36	1.04e-05	3.59e-06	-5.14e-07	-3.51e-06
37	9.91e-06	2.79e-06	8.81e-07	-2.79e-06		37	9.91e-06	2.79e-06	8.81e-07	-2.79e-06
38	1.06e-05	2.71e-06	6.48e-07	-2.47e-06		38	1.06e-05	2.71e-06	6.48e-07	-2.47e-06
39	9.45e-06	2.39e-06	-5.14e-07	-1.75e-06		39	9.45e-06	2.39e-06	-5.14e-07	-1.75e-06
40	9.45e-06	2.23e-06	-1.21e-06	-1.67e-06		40	9.45e-06	2.23e-06	-1.21e-06	-1.67e-06
41	8.98e-06	1.35e-06	-1.44e-06	-1.51e-06		41	8.98e-06	1.35e-06	-1.44e-06	-1.51e-06
42	8.51e-06	1.43e-06	-1.68e-06	-7.08e-07		42	8.51e-06	1.43e-06	-1.68e-06	-7.08e-07
43	8.28e-06	1.11e-06	-2.14e-06	-3.08e-07		43	8.28e-06	1.11e-06	-2.14e-06	-3.08e-07
44	7.82e-06	4.65e-07	-2.37e-06	7.32e-07		44	7.82e-06	4.65e-07	-2.37e-06	7.32e-07
45	6.89e-06	-1.76e-07	-3.3e-06	7.32e-07		45	6.89e-06	-1.76e-07	-3.3e-06	7.32e-07
46	5.96e-06	-9.76e-07	-3.07e-06	1.69e-06		46	5.96e-06	-9.76e-07	-3.07e-06	1.69e-06
47	4.79e-06	-3.36e-07	-4.47e-06	1.45e-06		47	4.79e-06	-3.36e-07	-4.47e-06	1.45e-06
48	3.4e-06	-1.78e-06	-1.68e-06	2.25e-06		48	3.4e-06	-1.78e-06	-1.68e-06	2.25e-06
49	2.93e-06	-1.46e-06	-3.77e-06	2.57e-06		49	2.93e-06	-1.46e-06	-3.77e-06	2.57e-06
50	2.24e-06	-2.18e-06	-2.14e-06	3.77e-06		50	2.24e-06	-2.18e-06	-2.14e-06	3.77e-06
51	1.54e-06	-1.54e-06	-2.84e-06	4.25e-06		51	1.54e-06	-1.54e-06	-2.84e-06	4.25e-06
52	-8.81e-08	-2.34e-06	-2.14e-06	4.97e-06		52	-8.81e-08	-2.34e-06	-2.14e-06	4.97e-06
53	-7.86e-07	-2.1e-06	-2.14e-06	4.73e-06		53	-7.86e-07	-2.1e-06	-2.14e-06	4.73e-06
54	-1.95e-06	-2.5e-06	-1.91e-06	5.21e-06		54	-1.95e-06	-2.5e-06	-1.91e-06	5.21e-06
55	-2.88e-06	-1.94e-06	-1.21e-06	5.13e-06		55	-2.88e-06	-1.94e-06	-1.21e-06	5.13e-06
56	-3.11e-06	-1.94e-06	-2.61e-06	5.54e-06		56	-3.11e-06	-1.94e-06	-2.61e-06	5.54e-06
57	-3.34e-06	-1.94e-06	-2.14e-06	6.1e-06		57	-3.34e-06	-1.94e-06	-2.14e-06	6.1e-06
58	-3.11e-06	-1.38e-06	-4.23e-06	6.18e-06		58	-3.11e-06	-1.38e-06	-4.23e-06	6.18e-06
59	-3.11e-06	-1.14e-06	-2.84e-06	6.5e-06		59	-3.11e-06	-1.14e-06	-2.84e-06	6.5e-06
60	-2.18e-06	-7.36e-07	-5.63e-06	6.18e-06		60	-2.18e-06	-7.36e-07	-5.63e-06	6.18e-06
61	-2.41e-06	-7.36e-07	-3.07e-06	7.14e-06		61	-2.41e-06	-7.36e-07	-3.07e-06	7.14e-06
62	-1.48e-06	3.85e-07	-5.4e-06	6.98e-06		62	-1.48e-06	3.85e-07	-5.4e-06	6.98e-06
63	-1.95e-06	-4.16e-07	-3.54e-06	7.7e-06		63	-1.95e-06	-4.16e-07	-3.54e-06	7.7e-06
64	-1.02e-06	2.25e-07	-5.4e-06	7.38e-06		64	-1.02e-06	2.25e-07	-5.4e-06	7.38e-06
65	-1.25e-06	-1.76e-07	-4.47e-06	8.18e-06		65	-1.25e-06	-1.76e-07	-4.47e-06	8.18e-06
66	-1.48e-06	3.85e-07	-5.86e-06	8.1e-06		66	-1.48e-06	3.85e-07	-5.86e-06	8.1e-06
67	-2.41e-06	2.25e-07	-5.4e-06	9.06e-06		67	-2.41e-06	2.25e-07	-5.4e-06	9.06e-06
68	-2.18e-06	5.45e-07	-7.02e-06	8.98e-06		68	-2.18e-06	5.45e-07	-7.02e-06	8.98e-06
69	-1.48e-06	-1.54e-08	-6.79e-06	9.62e-06		69	-1.48e-06	-1.54e-08	-6.79e-06	9.62e-06
70	-1.48e-06	-9.55e-08	-6.09e-06	9.06e-06		70	-1.48e-06	-9.55e-08	-6.09e-06	9.06e-06
71	-1.95e-06	-4.96e-07	-7.95e-06	9.78e-06		71	-1.95e-06	-4.96e-07	-7.95e-06	9.78e-06
72	-1.48e-06	-2.26e-06	-6.09e-06	1e-05		72	-1.48e-06	-2.26e-06	-6.09e-06	1e-05
73	-2.18e-06	-2.58e-06	-7.02e-06	9.3e-06		73	-2.18e-06	-2.58e-06	-7.02e-06	9.3e-06
74	-1.48e-06	-3.46e-06	-5.86e-06	9.46e-06		74	-1.48e-06	-3.46e-06	-5.86e-06	9.46e-06
75	-2.18e-06	-4.34e-06	-5.86e-06	9.3e-06		75	-2.18e-06	-4.34e-06	-5.86e-06	9.3e-06
76	-3.11e-06	-6.02e-06	-5.4e-06	9.3e-06		76	-3.11e-06	-6.02e-06	-5.4e-06	9.3e-06
77	-2.18e-06	-6.42e-06	-7.02e-06	9.22e-06		77	-2.18e-06	-6.42e-06	-7.02e-06	9.22e-06
78	-2.41e-06	-8.1e-06	-4.7e-06	9.94e-06		78	-2.41e-06	-8.1e-06	-4.7e-06	9.94e-06
79	-2.88e-06	-9.06e-06	-6.56e-06	9.06e-06		79	-2.88e-06	-9.06e-06	-6.56e-06	9.06e-06
80	-2.65e-06	-1.11e-05	-4.47e-06	9.94e-06		80	-2.65e-06	-1.11e-05	-4.47e-06	9.94e-06
81	-3.81e-06	-1.14e-05	-5.16e-06	9.46e-06		81	-3.81e-06	-1.14e-05	-5.16e-06	9.46e-06
82	-4.74e-06	-1.31e-05	-3.3e-06	9.62e-06		82	-4.74e-06	-1.31e-05	-3.3e-06	9.62e-06
83	-4.74e-06	-1.35e-05	-4.47e-06	9.14e-06		83	-4.74e-06	-1.35e-05	-4.47e-06	9.14e-06
84	-4.74e-06	-1.43e-05	-4.23e-06	9.38e-06		84	-4.74e-06	-1.43e-05	-4.23e-06	9.38e-06
85	-3.11e-06	-1.55e-05	-3.77e-06	1.02e-05		85	-3.11e-06	-1.55e-05	-3.77e-06	1.02e-05
86	-4.51e-06	-1.63e-05	-4.23e-06	1.03e-05		86	-4.51e-06	-1.63e-05	-4.23e-06	1.03e-05
87	-3.81e-06	-1.66e-05	-2.84e-06	1.01e-05		87	-3.81e-06	-1.66e-05	-2.84e-06	1.01e-05
88	-4.27e-06	-1.7e-05	-3.07e-06	1.07e-05		88	-4.27e-06	-1.7e-05	-3.07e-06	1.07e-05
89	-4.27e-06	-1.75e-05	-3.07e-06	1.13e-05		89	-4.27e-06	-1.75e-05	-3.07e-06	1.13e-05
90	-3.58e-06	-1.73e-05	-3.3e-06	1.13e-05		90	-3.58e-06	-1.73e-05	-3.3e-06	1.13e-05
91	-4.51e-06	-1.84e-05	-3.3e-06	1.16e-05		91	-4.51e-06	-1.84e-05	-3.3e-06	1.16e-05
92	-2.65e-06	-1.79e-05	-3.3e-06	1.16e-05		92	-2.65e-06	-1.79e-05	-3.3e-06	1.16e-05
93	-2.41e-06	-1.81e-05	-2.37e-06	1.18e-05		93	-2.41e-06	-1.81e-05	-2.37e-06	1.18e-05
94	-2.18e-06	-1.73e-05	-3.77e-06	1.08e-05		94	-2.18e-06	-1.73e-05	-3.77e-06	1.08e-05
95	-2.18e-06	-1.79e-05	-3.3e-06	1.14e-05		95	-2.18e-06	-1.79e-05	-3.3e-06	1.14e-05
96	-1.95e-06	-1.67e-05	-4.93e-06	1.16e-05		96	-1.95e-06	-1.67e-05	-4.93e-06	1.16e-05
97	-1.95e-06	-1.67e-05	-4.7e-06	1.15e-05		97	-1.95e-06	-1.67e-05	-4.7e-06	1.15e-05
98	-5.53e-07	-1.58e-05	-5.86e-06	1.13e-05		98	-5.53e-07	-1.58e-05	-5.86e-06	1.13e-05
99	-1.02e-06	-1.54e-05	-5.16e-06	1.07e-05		99	-1.02e-06	-1.54e-05	-5.16e-06	1.07e-05
100	-8.81e-08	-1.43e-05	-5.86e-06	1.03e-05		100	-8.81e-08	-1.43e-05	-5.86e-06	1.03e-05
101	-1.02e-06	-1.39e-05	-5.4e-06	1e-05		101	-1.02e-06	-1.39e-05	-5.4e-06	1e-05
102	-1.02e-06	-1.32e-05	-4.7e-06	9.86e-06		102	-1.02e-06	-1.32e-05	-4.7e-06	9.86e-06
103	-1.25e-06	-1.26e-05	-5.63e-06	8.74e-06		103	-1.25e-06	-1.26e-05	-5.63e-06	8.74e-06
104	-1.02e-06	-1.23e-05	-5.4e-06	8.18e-06		104	-1.02e-06	-1.23e-05	-5.4e-06	8.18e-06
105	3.77e-07	-1.09e-05	-6.56e-06	7.22e-06		105	3.77e-07	-1.09e-05	-6.56e-06	7.22e-06
106	-7.86e-07	-1.11e-05	-4.47e-06	6.58e-06		106	-7.86e-07	-1.11e-05	-4.47e-06	6.58e-06
107	-5.53e-07	-1.01e-05	-4.93e-06	5.7e-06		107	-5.53e-07	-1.01e-05	-4.93e-06	5.7e-06
108	-2.18e-06	-1.07e-05	-3.54e-06	5.54e-06		108	-2.18e-06	-1.07e-05	-3.54e-06	5.54e-06
109	-5.53e-07	-9.06e-06	-3.77e-06	4.57e-06		109	-5.53e-07	-9.06e-06	-3.77e-06	4.57e-06
110	-1.48e-06	-9.38e-06	-2.37e-06	5.05e-06		110	-1.48e-06	-9.38e-06	-2.37e-06	5.05e-06
111	-7.86e-07	-8.58e-06	-3.54e-06	4.17e-06		111	-7.86e-07	-8.58e-06	-3.54e-06	4.17e-06
112	-7.86e-07	-8.5e-06	-2.84e-06	4.33e-06		112	-7.86e-07	-8.5e-06	-2.84e-06	4.33e-06
113	-5.53e-07	-7.7e-06	-2.37e-06	3.45e-06		113	-5.53e-07	-7.7e-06	-2.37e-06	3.45e-06
114	-1.72e-06	-7.38e-06	-2.14e-06	3.37e-06		114	-1.72e-06	-7.38e-06	-2.14e-06	3.37e-06
115	-1.02e-06	-6.9e-06	-1.91e-06	2.65e-06		115	-1.02e-06	-6.9e-06	-1.91e-06	2.65e-06
116	-1.02e-06	-6.34e-06	-2.61e-06	2.65e-06		116	-1.02e-06	-6.34e-06	-2.61e-06	2.65e-06
117	-1.25e-06	-6.02e-06	-2.61e-06	2.09e-06		117	-1.25e-06	-6.02e-06	-2.61e-06	2.09e-06
118	-2.18e-06	-5.38e-06	-2.84e-06	2.25e-06		118	-2.18e-06	-5.38e-06	-2.84e-06	2.25e-06
119	-2.65e-06	-5.54e-06	-2.14e-06	1.85e-06		119	-2.65e-06	-5.54e-06	-2.14e-06	1.85e-06
120	-2.65e-06	-4.82e-06	-3.07e-06	1.45e-06		120	-2.65e-06	-4.82e-06	-3.07e-06	1.45e-06
121	-2.88e-06	-5.22e-06	-2.14e-06	1.45e-06		121	-2.88e-06	-5.22e-06	-2.14e-06	1.45e-06
122	-3.58e-06	-4.82e-06	-3.77e-06	8.92e-07		122	-3.58e-06	-4.82e-06	-3.77e-06	8.92e-07
123	-4.74e-06	-5.54e-06	-2.14e-06	1.61e-06		123	-4.74e-06	-5.54e-06	-2.14e-06	1.61e-06
124	-3.81e-06	-4.82e-06	-4e-06	1.13e-06		124	-3.81e-06	-4.82e-06	-4e-06	1.13e-06
125	-5.9e-06	-5.38e-06	-3.07e-06	1.29e-06		125	-5.9e-06	-5.38e-06	-3.07e-06	1.29e-06
126	-6.13e-06	-4.74e-06	-4.23e-06	8.12e-07		126	-6.13e-06	-4.74e-06	-4.23e-06	8.12e-07
127	-7.3e-06	-5.54e-06	-3.3e-06	8.12e-07		127	-7.3e-06	-5.54e-06	-3.3e-06	8.12e-07
128	-6.6e-06	-5.14e-06	-4.7e-06	9.73e-07		128	-6.6e-06	-5.14e-06	-4.7e-06	9.73e-07
129	-8.46e-06	-5.22e-06	-4.47e-06	1.21e-06		129	-8.46e-06	-5.22e-06	-4.47e-06	1.21e-06
130	-8.69e-06	-5.62e-06	-3.77e-06	5.72e-07		130	-8.69e-06	-5.62e-06	-3.77e-06	5.72e-07
131	-1.03e-05	-5.38e-06	-4e-06	8.92e-07		131	-1.03e-05	-5.38e-06	-4e-06	8.92e-07
132	-1.1e-05	-5.14e-06	-3.54e-06	7.32e-07		132	-1.1e-05	-5.14e-06	-3.54e-06	7.32e-07
133	-1.15e-05	-4.98e-06	-3.54e-06	1.2e-08		133	-1.15e-05	-4.98e-06	-3.54e-06	1.2e-08
134	-1.22e-05	-5.38e-06	-3.3e-06	-6.81e-08		134	-1.22e-05	-5.38e-06	-3.3e-06	-6.81e-08
135	-1.17e-05	-4.98e-06	-4e-06	-6.28e-07		135	-1.17e-05	-4.98e-06	-4e-06	-6.28e-07
136	-1.33e-05	-4.9e-06	-3.07e-06	-6.28e-07		136	-1.33e-05	-4.9e-06	-3.07e-06	-6.28e-07
137	-1.38e-05	-4.1e-06	-4e-06	-1.19e-06		137	-1.38e-05	-4.1e-06	-4e-06	-1.19e-06
138	-1.5e-05	-4.02e-06	-2.84e-06	-1.59e-06		138	-1.5e-05	-4.02e-06	-2.84e-06	-1.59e-06
139	-1.45e-05	-3.62e-06	-4.23e-06	-2.07e-06		139	-1.45e-05	-3.62e-06	-4.23e-06	-2.07e-06
140	-1.54e-05	-4.02e-06	-2.14e-06	-2.07e-06		140	-1.54e-05	-4.02e-06	-2.14e-06	-2.07e-06
141	-1.52e-05	-2.9e-06	-4e-06	-2.95e-06		141	-1.52e-05	-2.9e-06	-4e-06	-2.95e-06
142	-1.61e-05	-2.34e-06	-3.3e-06	-3.03e-06		142	-1.61e-05	-2.34e-06	-3.3e-06	-3.03e-06
143	-1.52e-05	-8.96e-07	-3.3e-06	-3.35e-06		143	-1.52e-05	-8.96e-07	-3.3e-06	-3.35e-06
144	-1.52e-05	-1.3e-06	-3.07e-06	-2.87e-06		144	-1.52e-05	-1.3e-06	-3.07e-06	-2.87e-06
145	-1.38e-05	-4.16e-07	-2.61e-06	-3.99e-06		145	-1.38e-05	-4.16e-07	-2.61e-06	-3.99e-06
146	-1.33e-05	3.85e-07	-2.84e-06	-3.59e-06		146	-1.33e-05	3.85e-07	-2.84e-06	-3.59e-06
147	-1.26e-05	6.25e-07	-3.07e-06	-3.99e-06		147	-1.26e-05	6.25e-07	-3.07e-06	-3.99e-06
148	-1.22e-05	1.35e-06	-3.07e-06	-4.31e-06		148	-1.22e-05	1.35e-06	-3.07e-06	-4.31e-06
149	-1.26e-05	2.15e-06	-3.07e-06	-4.39e-06		149	-1.26e-05	2.15e-06	-3.07e-06	-4.39e-06
150	-1.17e-05	3.59e-06	-3.77e-06	-4.39e-06		150	-1.17e-05	3.59e-06	-3.77e-06	-4.39e-06
151	-1.15e-05	4.23e-06	-2.84e-06	-4.15e-06		151	-1.15e-05	4.23e-06	-2.84e-06	-4.15e-06
152	-1.15e-05	4.87e-06	-3.54e-06	-4.31e-06		152	-1.15e-05	4.87e-06	-3.54e-06	-4.31e-06
153	-1.12e-05	4.71e-06	-3.07e-06	-4.23e-06		153	-1.12e-05	4.71e-06	-3.07e-06	-4.23e-06
154	-1.08e-05	5.91e-06	-4.93e-06	-4.71e-06		154	-1.08e-05	5.91e-06	-4.93e-06	-4.71e-06
155	-1.06e-05	5.67e-06	-4.7e-06	-4.15e-06		155	-1.06e-05	5.67e-06	-4.7e-06	-4.15e-06
156	-9.16e-06	6.95e-06	-5.63e-06	-4.55e-06		156	-9.16e-06	6.95e-06	-5.63e-06	-4.55e-06
157	-8.46e-06	6.87e-06	-5.86e-06	-3.99e-06		157	-8.46e-06	6.87e-06	-5.86e-06	-3.99e-06
158	-8.46e-06	7.75e-06	-6.56e-06	-4.39e-06		158	-8.46e-06	7.75e-06	-6.56e-06	-4.39e-06
159	-8.69e-06	8.07e-06	-7.02e-06	-3.83e-06		159	-8.69e-06	8.07e-06	-7.02e-06	-3.83e-06
160	-8.46e-06	8.63e-06	-9.12e-06	-3.83e-06		160	-8.46e-06	8.63e-06	-9.12e-06	-3.83e-06
161	-8.92e-06	9.03e-06	-9.82e-06	-4.23e-06		161	-8.92e-06	9.03e-06	-9.82e-06	-4.23e-06
162	-7.3e-06	9.51e-06	-1.05e-05	-4.63e-06		162	-7.3e-06	9.51e-06	-1.05e-05	-4.63e-06
163	-7.76e-06	9.91e-06	-1.12e-05	-4.95e-06		163	-7.76e-06	9.91e-06	-1.12e-05	-4.95e-06
164	-7.99e-06	9.99e-06	-1.17e-05	-5.11e-06		164	-7.99e-06	9.99e-06	-1.17e-05	-5.11e-06
165	-5.67e-06	1.09e-05	-1.28e-05	-5.83e-06		165	-5.67e-06	1.09e-05	-1.28e-05	-5.83e-06
166	-6.13e-06	1.04e-05	-1.26e-05	-5.67e-06		166	-6.13e-06	1.04e-05	-1.26e-05	-5.67e-06
167	-4.74e-06	1.14e-05	-1.4e-05	-6.55e-06		167	-4.74e-06	1.14e-05	-1.4e-05	-6.55e-06
168	-4.04e-06	1.05e-05	-1.24e-05	-6.31e-06		168	-4.04e-06	1.05e-05	-1.24e-05	-6.31e-06
169	-3.81e-06	1.14e-05	-1.26e-05	-6.71e-06		169	-3.81e-06	1.14e-05	-1.26e-05	-6.71e-06
170	-4.04e-06	1.07e-05	-1.14e-05	-5.91e-06		170	-4.04e-06	1.07e-05	-1.14e-05	-5.91e-06
171	-2.65e-06	1.13e-05	-1.26e-05	-6.23e-06		171	-2.65e-06	1.13e-05	-1.26e-05	-6.23e-06
172	-2.65e-06	1.09e-05	-1.19e-05	-5.99e-06		172	-2.65e-06	1.09e-05	-1.19e-05	-5.99e-06
173	-1.72e-06	1.09e-05	-1.28e-05	-5.75e-06		173	-1.72e-06	1.09e-05	-1.28e-05	-5.75e-06
174	-1.02e-06	1.02e-05	-1.28e-05	-5.19e-06		174	-1.02e-06	1.02e-05	-1.28e-05	-5.19e-06
175	-1.25e-06	1.02e-05	-1.31e-05	-5.27e-06		175	-1.25e-06	1.02e-05	-1.31e-05	-5.27e-06
176	-5.53e-07	9.91e-06	-1.31e-05	-5.03e-06		176	-5.53e-07	9.91e-06	-1.31e-05	-5.03e-06
177	-8.81e-08	9.99e-06	-1.35e-05	-4.79e-06		177	-8.81e-08	9.99e-06	-1.35e-05	-4.79e-06
178	1.44e-07	9.59e-06	-1.42e-05	-4.39e-06		178	1.44e-07	9.59e-06	-1.42e-05	-4.39e-06
179	8.42e-07	9.51e-06	-1.4e-05	-4.71e-06		179	8.42e-07	9.51e-06	-1.4e-05	-4.71e-06
180	8.42e-07	9.67e-06	-1.61e-05	-4.31e-06		180	8.42e-07	9.67e-06	-1.61e-05	-4.31e-06
181	6.09e-07	8.79e-06	-1.52e-05	-3.99e-06		181	6.09e-07	8.79e-06	-1.52e-05	-3.99e-06
182	2.47e-06	9.59e-06	-1.61e-05	-4.23e-06		182	2.47e-06	9.59e-06	-1.61e-05	-4.23e-06
183	1.77e-06	9.11e-06	-1.45e-05	-3.35e-06		183	1.77e-06	9.11e-06	-1.45e-05	-3.35e-06
184	3.17e-06	8.95e-06	-1.59e-05	-4.15e-06		184	3.17e-06	8.95e-06	-1.59e-05	-4.15e-06
185	2.47e-06	8.79e-06	-1.47e-05	-3.19e-06		185	2.47e-06	8.79e-06	-1.47e-05	-3.19e-06
186	3.4e-06	8.63e-06	-1.56e-05	-3.91e-06		186	3.4e-06	8.63e-06	-1.56e-05	-3.91e-06
187	3.17e-06	7.35e-06	-1.42e-05	-3.11e-06		187	3.17e-06	7.35e-06	-1.42e-05	-3.11e-06
188	4.79e-06	8.07e-06	-1.52e-05	-3.03e-06		188	4.79e-06	8.07e-06	-1.52e-05	-3.03e-06
189	4.33e-06	7.03e-06	-1.35e-05	-2.47e-06		189	4.33e-06	7.03e-06	-1.35e-05	-2.47e-06
190	5.03e-06	7.11e-06	-1.35e-05	-2.07e-06		190	5.03e-06	7.11e-06	-1.35e-05	-2.07e-06
191	6.19e-06	7.03e-06	-1.21e-05	-1.75e-06		191	6.19e-06	7.03e-06	-1.21e-05	-1.75e-06
192	6.89e-06	6.79e-06	-1.14e-05	-1.75e-06		192	6.89e-06	6.79e-06	-1.14e-05	-1.75e-06
193	7.35e-06	6.55e-06	-1.12e-05	-1.99e-06		193	7.35e-06	6.55e-06	-1.12e-05	-1.99e-06
194	6.65e-06	6.55e-06	-9.82e-06	-1.75e-06		194	6.65e-06	6.55e-06	-9.82e-06	-1.75e-06
195	7.58e-06	6.87e-06	-9.12e-06	-1.67e-06		195	7.58e-06	6.87e-06	-9.12e-06	-1.67e-06
196	7.82e-06	6.39e-06	-7.95e-06	-1.27e-06		196	7.82e-06	6.39e-06	-7.95e-06	-1.27e-06
197	7.82e-06	7.03e-06	-7.95e-06	-1.67e-06		197	7.82e-06	7.03e-06	-7.95e-06	-1.67e-06
198	7.12e-06	6.71e-06	-5.86e-06	-9.49e-07		198	7.12e-06	6.71e-06	-5.86e-06	-9.49e-07
199	7.82e-06	7.11e-06	-6.79e-06	-1.03e-06		199	7.82e-06	7.11e-06	-6.79e-06	-1.03e-06
200	7.12e-06	6.39e-06	-4.93e-06	-5.48e-07		200	7.12e-06	6.39e-06	-4.93e-06	-5.48e-07
201	8.05e-06	7.27e-06	-4.7e-06	-4.68e-07		201	8.05e-06	7.27e-06	-4.7e-06	-4.68e-07
202	7.82e-06	6.39e-06	-4.47e-06	1.72e-07		202	7.82e-06	6.39e-06	-4.47e-06	1.72e-07
203	8.28e-06	6.95e-06	-4.23e-06	4.92e-07		203	8.28e-06	6.95e-06	-4.23e-06	4.92e-07
204	7.58e-06	6.63e-06	-2.61e-06	8.92e-07		204	7.58e-06	6.63e-06	-2.61e-06	8.92e-07
205	8.28e-06	6.95e-06	-2.14e-06	1.21e-06		205	8.28e-06	6.95e-06	-2.14e-06	1.21e-06
206	7.58e-06	6.87e-06	-1.21e-06	1.45e-06		206	7.58e-06	6.87e-06	-1.21e-06	1.45e-06
207	8.51e-06	7.11e-06	-7.47e-07	1.45e-06		207	8.51e-06	7.11e-06	-7.47e-07	1.45e-06
208	6.89e-06	7.43e-06	-9.79e-07	1.29e-06		208	6.89e-06	7.43e-06	-9.79e-07	1.29e-06
209	7.12e-06	6.71e-06	-2.82e-07	1.21e-06		209	7.12e-06	6.71e-06	-2.82e-07	1.21e-06
210	7.35e-06	6.87e-06	-4.94e-08	1.37e-06		210	7.35e-06	6.87e-06	-4.94e-08	1.37e-06
211	6.65e-06	6.71e-06	6.48e-07	1.05e-06		211	6.65e-06	6.71e-06	6.48e-07	1.05e-06
212	6.89e-06	6.63e-06	-4.94e-08	9.73e-07		212	6.89e-06	6.63e-06	-4.94e-08	9.73e-07
213	5.96e-06	5.99e-06	1.81e-06	4.12e-07		213	5.96e-06	5.99e-06	1.81e-06	4.12e-07
214	5.49e-06	6.39e-06	8.81e-07	1.72e-07		214	5.49e-06	6.39e-06	8.81e-07	1.72e-07
215	5.26e-06	6.15e-06	2.51e-06	-2.28e-07		215	5.26e-06	6.15e-06	2.51e-06	-2.28e-07
216	5.96e-06	6.31e-06	1.81e-06	-3.08e-07		216	5.96e-06	6.31e-06	1.81e-06	-3.08e-07
217	5.26e-06	5.51e-06	3.9e-06	2.52e-07		217	5.26e-06	5.51e-06	3.9e-06	2.52e-07
218	5.03e-06	5.91e-06	3.9e-06	9.2e-08		218	5.03e-06	5.91e-06	3.9e-06	9.2e-08
219	4.56e-06	5.59e-06	4.37e-06	4.12e-07		219	4.56e-06	5.59e-06	4.37e-06	4.12e-07
220	5.72e-06	6.07e-06	3.9e-06	5.72e-07		220	5.72e-06	6.07e-06	3.9e-06	5.72e-07
221	4.33e-06	5.27e-06	4.83e-06	4.92e-07		221	4.33e-06	5.27e-06	4.83e-06	4.92e-07
222	4.79e-06	5.51e-06	4.83e-06	4.12e-07		222	4.79e-06	5.51e-06	4.83e-06	4.12e-07
223	4.79e-06	5.11e-06	3.9e-06	2.52e-07		223	4.79e-06	5.11e-06	3.9e-06	2.52e-07
224	4.79e-06	5.11e-06	4.6e-06	6.52e-07		224	4.79e-06	5.11e-06	4.6e-06	6.52e-07
225	3.63e-06	5.11e-06	3.44e-06	5.72e-07		225	3.63e-06	5.11e-06	3.44e-06	5.72e-07
226	4.1e-06	5.27e-06	4.6e-06	3.32e-07		226	4.1e-06	5.27e-06	4.6e-06	3.32e-07
227	4.79e-06	5.11e-06	3.9e-06	-2.28e-07		227	4.79e-06	5.11e-06	3.9e-06	-2.28e-07
228	4.56e-06	4.79e-06	4.37e-06	-6.81e-08		228	4.56e-06	4.79e-06	4.37e-06	-6.81e-08
229	4.79e-06	4.71e-06	3.44e-06	-9.49e-07		229	4.79e-06	4.71e-06	3.44e-06	-9.49e-07
230	3.4e-06	3.99e-06	3.9e-06	-4.68e-07		230	3.4e-06	3.99e-06	3.9e-06	-4.68e-07
231	4.56e-06	4.23e-06	3.67e-06	-4.68e-07		231	4.56e-06	4.23e-06	3.67e-06	-4.68e-07
232	3.86e-06	3.19e-06	5.07e-06	2.52e-07		232	3.86e-06	3.19e-06	5.07e-06	2.52e-07
233	4.56e-06	3.43e-06	4.83e-06	1.72e-07		233	4.56e-06	3.43e-06	4.83e-06	1.72e-07
234	4.33e-06	1.91e-06	4.83e-06	4.12e-07		234	4.33e-06	1.91e-06	4.83e-06	4.12e-07
235	4.56e-06	1.35e-06	6.69e-06	-1.48e-07		235	4.56e-06	1.35e-06	6.69e-06	-1.48e-07
236	4.1e-06	1.45e-07	7.62e-06	1.21e-06		236	4.1e-06	1.45e-07	7.62e-06	1.21e-06
237	5.03e-06	-9.76e-07	7.62e-06	1.13e-06		237	5.03e-06	-9.76e-07	7.62e-06	1.13e-06
238	4.56e-06	-1.14e-06	8.55e-06	1.13e-06		238	4.56e-06	-1.14e-06	8.55e-06	1.13e-06
239	5.49e-06	-1.94e-06	9.25e-06	2.01e-06		239	5.49e-06	-1.94e-06	9.25e-06	2.01e-06
240	5.26e-06	-2.26e-06	1.09e-05	1.93e-06		240	5.26e-06	-2.26e-06	1.09e-05	1.93e-06
241	5.26e-06	-3.46e-06	1.18e-05	1.37e-06		241	5.26e-06	-3.46e-06	1.18e-05	1.37e-06
242	5.26e-06	-3.3e-06	1.2e-05	1.69e-06		242	5.26e-06	-3.3e-06	1.2e-05	1.69e-06
243	5.03e-06	-4.42e-06	1.41e-05	1.61e-06		243	5.03e-06	-4.42e-06	1.41e-05	1.61e-06
244	5.03e-06	-3.7e-06	1.34e-05	1.29e-06		244	5.03e-06	-3.7e-06	1.34e-05	1.29e-06
245	4.56e-06	-4.42e-06	1.44e-05	1.29e-06		245	4.56e-06	-4.42e-06	1.44e-05	1.29e-06
246	5.49e-06	-3.78e-06	1.39e-05	6.52e-07		246	5.49e-06	-3.78e-06	1.39e-05	6.52e-07
247	4.33e-06	-4.42e-06	1.53e-05	9.73e-07		247	4.33e-06	-4.42e-06	1.53e-05	9.73e-07
248	4.33e-06	-3.86e-06	1.41e-05	5.72e-07		248	4.33e-06	-3.86e-06	1.41e-05	5.72e-07
249	3.86e-06	-4.26e-06	1.51e-05	-3.88e-07		249	3.86e-06	-4.26e-06	1.51e-05	-3.88e-07
250	3.86e-06	-3.3e-06	1.51e-05	-3.08e-07		250	3.86e-06	-3.3e-06	1.51e-05	-3.08e-07
251	3.86e-06	-3.7e-06	1.44e-05	-5.48e-07		251	3.86e-06	-3.7e-06	1.44e-05	-5.48e-07
252	3.63e-06	-3.22e-06	1.48e-05	-1.19e-06		252	3.63e-06	-3.22e-06	1.48e-05	-1.19e-06
253	3.4e-06	-2.66e-06	1.39e-05	-1.35e-06		253	3.4e-06	-2.66e-06	1.39e-05	-1.35e-06
254	2.47e-06	-2.34e-06	1.44e-05	-1.43e-06		254	2.47e-06	-2.34e-06	1.44e-05	-1.43e-06
255	1.77e-06	-1.86e-06	1.51e-05	-2.31e-06		255	1.77e-06	-1.86e-06	1.51e-05	-2.31e-06
256	1.77e-06	-2.42e-06	1.48e-05	-2.71e-06		256	1.77e-06	-2.42e-06	1.48e-05	-2.71e-06
257	2.7e-06	-1.86e-06	1.37e-05	-3.43e-06		257	2.7e-06	-1.86e-06	1.37e-05	-3.43e-06
258	1.54e-06	-2.5e-06	1.55e-05	-3.35e-06		258	1.54e-06	-2.5e-06	1.55e-05	-3.35e-06
259	2e-06	-1.94e-06	1.39e-05	-3.99e-06		259	2e-06	-1.94e-06	1.39e-05	-3.99e-06
260	1.31e-06	-2.18e-06	1.55e-05	-4.39e-06		260	1.31e-06	-2.18e-06	1.55e-05	-4.39e-06
261	1.07e-06	-1.22e-06	1.48e-05	-4.63e-06		261	1.07e-06	-1.22e-06	1.48e-05	-4.63e-06
262	1.31e-06	-2.1e-06	1.58e-05	-4.79e-06		262	1.31e-06	-2.1e-06	1.58e-05	-4.79e-06
263	1.07e-06	-1.14e-06	1.44e-05	-4.71e-06		263	1.07e-06	-1.14e-06	1.44e-05	-4.71e-06
264	3.77e-07	-1.46e-06	1.58e-05	-4.87e-06		264	3.77e-07	-1.46e-06	1.58e-05	-4.87e-06
265	1.44e-07	-6.56e-07	1.48e-05	-5.11e-06		265	1.44e-07	-6.56e-07	1.48e-05	-5.11e-06
266	-3.21e-07	-1.22e-06	1.67e-05	-5.27e-06		266	-3.21e-07	-1.22e-06	1.67e-05	-5.27e-06
267	3.77e-07	-7.36e-07	1.65e-05	-4.71e-06		267	3.77e-07	-7.36e-07	1.65e-05	-4.71e-06
268	-7.86e-07	-6.56e-07	1.62e-05	-4.47e-06		268	-7.86e-07	-6.56e-07	1.62e-05	-4.47e-06
269	1.44e-07	-8.96e-07	1.55e-05	-4.23e-06		269	1.44e-07	-8.96e-07	1.55e-05	-4.23e-06
270	-1.25e-06	-4.96e-07	1.51e-05	-4.63e-06		270	-1.25e-06	-4.96e-07	1.51e-05	-4.63e-06
271	-2.18e-06	-1.3e-06	1.62e-05	-4.47e-06		271	-2.18e-06	-1.3e-06	1.62e-05	-4.47e-06
272	-1.72e-06	-7.36e-07	1.55e-05	-4.71e-06		272	-1.72e-06	-7.36e-07	1.55e-05	-4.71e-06
273	-2.18e-06	-1.3e-06	1.65e-05	-4.79e-06		273	-2.18e-06	-1.3e-06	1.65e-05	-4.79e-06
274	-2.41e-06	-8.96e-07	1.58e-05	-5.59e-06		274	-2.41e-06	-8.96e-07	1.58e-05	-5.59e-06
275	-2.41e-06	-1.38e-06	1.65e-05	-5.11e-06		275	-2.41e-06	-1.38e-06	1.65e-05	-5.11e-06
276	-3.58e-06	-5.76e-07	1.39e-05	-5.43e-06		276	-3.58e-06	-5.76e-07	1.39e-05	-5.43e-06
277	-4.27e-06	-9.76e-07	1.6e-05	-6.15e-06		277	-4.27e-06	-9.76e-07	1.6e-05	-6.15e-06
278	-3.81e-06	-4.16e-07	1.48e-05	-6.23e-06		278	-3.81e-06	-4.16e-07	1.48e-05	-6.23e-06
279	-4.74e-06	-1.38e-06	1.6e-05	-6.55e-06		279	-4.74e-06	-1.38e-06	1.6e-05	-6.55e-06
280	-4.51e-06	-5.76e-07	1.58e-05	-6.39e-06		280	-4.51e-06	-5.76e-07	1.58e-05	-6.39e-06
281	-5.2e-06	-7.36e-07	1.62e-05	-5.83e-06		281	-5.2e-06	-7.36e-07	1.62e-05	-5.83e-06
282	-4.51e-06	-9.55e-08	1.62e-05	-6.47e-06		282	-4.51e-06	-9.55e-08	1.62e-05	-6.47e-06
283	-4.97e-06	-1.54e-08	1.67e-05	-6.63e-06		283	-4.97e-06	-1.54e-08	1.67e-05	-6.63e-06
284	-4.51e-06	4.65e-07	1.67e-05	-6.55e-06		284	-4.51e-06	4.65e-07	1.67e-05	-6.55e-06
285	-5.44e-06	3.85e-07	1.67e-05	-6.63e-06		285	-5.44e-06	3.85e-07	1.67e-05	-6.63e-06
286	-5.9e-06	2.25e-07	1.72e-05	-6.23e-06		286	-5.9e-06	2.25e-07	1.72e-05	-6.23e-06
287	-4.97e-06	7.85e-07	1.58e-05	-6.55e-06		287	-4.97e-06	7.85e-07	1.58e-05	-6.55e-06
288	-4.51e-06	7.05e-07	1.65e-05	-6.55e-06		288	-4.51e-06	7.05e-07	1.65e-05	-6.55e-06
289	-4.74e-06	1.59e-06	1.44e-05	-6.79e-06		289	-4.74e-06	1.59e-06	1.44e-05	-6.79e-06
290	-4.04e-06	1.75e-06	1.48e-05	-6.39e-06		290	-4.04e-06	1.75e-06	1.48e-05	-6.39e-06
291	-3.58e-06	2.23e-06	1.37e-05	-6.23e-06		291	-3.58e-06	2.23e-06	1.37e-05	-6.23e-06
292	-4.27e-06	1.43e-06	1.46e-05	-5.51e-06		292	-4.27e-06	1.43e-06	1.46e-05	-5.51e-06
293	-3.34e-06	1.75e-06	1.27e-05	-5.35e-06		293	-3.34e-06	1.75e-06	1.27e-05	-5.35e-06
294	-4.04e-06	1.03e-06	1.27e-05	-5.59e-06		294	-4.04e-06	1.03e-06	1.27e-05	-5.59e-06
295	-2.88e-06	1.91e-06	1.16e-05	-4.87e-06		295	-2.88e-06	1.91e-06	1.16e-05	-4.87e-06
296	-3.58e-06	2.07e-06	1.16e-05	-4.55e-06		296	-3.58e-06	2.07e-06	1.16e-05	-4.55e-06
297	-2.65e-06	2.87e-06	1.06e-05	-3.67e-06		297	-2.65e-06	2.87e-06	1.06e-05	-3.67e-06
298	-3.58e-06	2.87e-06	1.02e-05	-2.71e-06		298	-3.58e-06	2.87e-06	1.02e-05	-2.71e-06
299	-3.11e-06	2.71e-06	1.04e-05	-1.99e-06		299	-3.11e-06	2.71e-06	1.04e-05	-1.99e-06
300	-3.34e-06	2.95e-06	9.95e-06	-1.67e-06		300	-3.34e-06	2.95e-06	9.95e-06	-1.67e-06
301	-2.88e-06	2.71e-06	1.02e-05	-1.11e-06		301	-2.88e-06	2.71e-06	1.02e-05	-1.11e-06
302	-2.88e-06	4.15e-06	8.79e-06	-7.08e-07		302	-2.88e-06	4.15e-06	8.79e-06	-7.08e-07
303	-3.34e-06	4.07e-06	9.72e-06	5.72e-07		303	-3.34e-06	4.07e-06	9.72e-06	5.72e-07
304	-3.58e-06	5.03e-06	7.62e-06	8.92e-07		304	-3.58e-06	5.03e-06	7.62e-06	8.92e-07
305	-3.58e-06	4.95e-06	9.02e-06	2.25e-06		305	-3.58e-06	4.95e-06	9.02e-06	2.25e-06
306	-2.88e-06	6.07e-06	8.32e-06	2.17e-06		306	-2.88e-06	6.07e-06	8.32e-06	2.17e-06
307	-3.11e-06	5.83e-06	8.09e-06	3.37e-06		307	-3.11e-06	5.83e-06	8.09e-06	3.37e-06
308	-2.18e-06	7.19e-06	5.76e-06	3.69e-06		308	-2.18e-06	7.19e-06	5.76e-06	3.69e-06
309	-2.41e-06	7.59e-06	7.39e-06	4.73e-06		309	-2.41e-06	7.59e-06	7.39e-06	4.73e-06
310	-5.53e-07	8.95e-06	5.07e-06	5.7e-06		310	-5.53e-07	8.95e-06	5.07e-06	5.7e-06
311	-7.86e-07	9.27e-06	6e-06	6.66e-06		311	-7.86e-07	9.27e-06	6e-06	6.66e-06
312	6.09e-07	1.02e-05	5.07e-06	6.98e-06		312	6.09e-07	1.02e-05	5.07e-06	6.98e-06
313	1.54e-06	1.02e-05	5.76e-06	7.94e-06		313	1.54e-06	1.02e-05	5.76e-06	7.94e-06
314	2e-06	1.12e-05	5.07e-06	8.9e-06		314	2e-06	1.12e-05	5.07e-06	8.9e-06
315	3.4e-06	1.21e-05	4.6e-06	9.78e-06		315	3.4e-06	1.21e-05	4.6e-06	9.78e-06
316	3.86e-06	1.3e-05	4.14e-06	1.07e-05		316	3.86e-06	1.3e-05	4.14e-06	1.07e-05
317	4.1e-06	1.38e-05	3.44e-06	1.15e-05		317	4.1e-06	1.38e-05	3.44e-06	1.15e-05
318	3.63e-06	1.37e-05	3.67e-06	1.23e-05		318	3.63e-06	1.37e-05	3.67e-06	1.23e-05
319	4.33e-06	1.58e-05	2.74e-06	1.24e-05		319	4.33e-06	1.58e-05	2.74e-06	1.24e-05
320	4.56e-06	1.6e-05	2.74e-06	1.35e-05		320	4.56e-06	1.6e-05	2.74e-06	1.35e-05
321	5.26e-06	1.74e-05	1.83e-07	1.39e-05		321	5.26e-06	1.74e-05	1.83e-07	1.39e-05
322	5.72e-06	1.7e-05	1.58e-06	1.43e-05		322	5.72e-06	1.7e-05	1.58e-06	1.43e-05
323	6.89e-06	1.81e-05	1.83e-07	1.48e-05		323	6.89e-06	1.81e-05	1.83e-07	1.48e-05
324	5.72e-06	1.78e-05	-4.94e-08	1.49e-05		324	5.72e-06	1.78e-05	-4.94e-08	1.49e-05
325	6.89e-06	1.9e-05	-1.21e-06	1.55e-05		325	6.89e-06	1.9e-05	-1.21e-06	1.55e-05
326	6.42e-06	1.96e-05	-1.91e-06	1.55e-05		326	6.42e-06	1.96e-05	-1.91e-06	1.55e-05
327	7.35e-06	2.06e-05	-2.61e-06	1.63e-05		327	7.35e-06	2.06e-05	-2.61e-06	1.63e-05
328	7.35e-06	2.06e-05	-2.14e-06	1.59e-05		328	7.35e-06	2.06e-05	-2.14e-06	1.59e-05
329	6.89e-06	2.11e-05	-3.3e-06	1.6e-05		329	6.89e-06	2.11e-05	-3.3e-06	1.6e-05
330	6.89e-06	2.18e-05	-3.54e-06	1.51e-05		330	6.89e-06	2.18e-05	-3.54e-06	1.51e-05
331	7.35e-06	2.2e-05	-4.23e-06	1.56e-05		331	7.35e-06	2.2e-05	-4.23e-06	1.56e-05
332	5.96e-06	2.25e-05	-5.16e-06	1.47e-05		332	5.96e-06	2.25e-05	-5.16e-06	1.47e-05
333	6.89e-06	2.24e-05	-4.93e-06	1.48e-05		333	6.89e-06	2.24e-05	-4.93e-06	1.48e-05
334	7.35e-06	2.31e-05	-6.79e-06	1.36e-05		334	7.35e-06	2.31e-05	-6.79e-06	1.36e-05
335	6.42e-06	2.25e-05	-6.33e-06	1.42e-05		335	6.42e-06	2.25e-05	-6.33e-06	1.42e-05
336	7.82e-06	2.38e-05	-8.89e-06	1.34e-05		336	7.82e-06	2.38e-05	-8.89e-06	1.34e-05
337	7.12e-06	2.29e-05	-8.65e-06	1.34e-05		337	7.12e-06	2.29e-05	-8.65e-06	1.34e-05
338	7.35e-06	2.37e-05	-1.1e-05	1.25e-05		338	7.35e-06	2.37e-05	-1.1e-05	1.25e-05
339	6.65e-06	2.32e-05	-1.07e-05	1.27e-05		339	6.65e-06	2.32e-05	-1.07e-05	1.27e-05
340	8.28e-06	2.41e-05	-1.28e-05	1.2e-05		340	8.28e-06	2.41e-05	-1.28e-05	1.2e-05
341	8.51e-06	2.43e-05	-1.26e-05	1.23e-05		341	8.51e-06	2.43e-05	-1.26e-05	1.23e-05
342	9.21e-06	2.43e-05	-1.42e-05	1.15e-05		342	9.21e-06	2.43e-05	-1.42e-05	1.15e-05
343	8.51e-06	2.43e-05	-1.47e-05	1.15e-05		343	8.51e-06	2.43e-05	-1.47e-05	1.15e-05
344	8.75e-06	2.4e-05	-1.63e-05	1.15e-05		344	8.75e-06	2.4e-05	-1.63e-05	1.15e-05
345	7.82e-06	2.38e-05	-1.63e-05	1.1e-05		345	7.82e-06	2.38e-05	-1.63e-05	1.1e-05
346	8.28e-06	2.37e-05	-1.63e-05	1.14e-05		346	8.28e-06	2.37e-05	-1.63e-05	1.14e-05
347	6.89e-06	2.38e-05	-1.82e-05	1.07e-05		347	6.89e-06	2.38e-05	-1.82e-05	1.07e-05
348	7.12e-06	2.31e-05	-1.68e-05	1.1e-05		348	7.12e-06	2.31e-05	-1.68e-05	1.1e-05
349	6.89e-06	2.31e-05	-1.91e-05	1.09e-05		349	6.89e-06	2.31e-05	-1.91e-05	1.09e-05
350	5.49e-06	2.22e-05	-1.77e-05	1.12e-05		350	5.49e-06	2.22e-05	-1.77e-05	1.12e-05
351	4.79e-06	2.24e-05	-1.87e-05	1.03e-05		351	4.79e-06	2.24e-05	-1.87e-05	1.03e-05
352	3.63e-06	2.15e-05	-1.75e-05	1.11e-05		352	3.63e-06	2.15e-05	-1.75e-05	1.11e-05
353	3.86e-06	2.2e-05	-1.89e-05	1.1e-05		353	3.86e-06	2.2e-05	-1.89e-05	1.1e-05
354	2.7e-06	2.06e-05	-1.77e-05	1.13e-05		354	2.7e-06	2.06e-05	-1.77e-05	1.13e-05
355	3.17e-06	2.07e-05	-1.82e-05	1.16e-05		355	3.17e-06	2.07e-05	-1.82e-05	1.16e-05
356	2.47e-06	1.98e-05	-1.73e-05	1.16e-05		356	2.47e-06	1.98e-05	-1.73e-05	1.16e-05
357	1.54e-06	1.96e-05	-1.7e-05	1.15e-05		357	1.54e-06	1.96e-05	-1.7e-05	1.15e-05
358	-8.81e-08	1.86e-05	-1.68e-05	1.12e-05		358	-8.81e-08	1.86e-05	-1.68e-05	1.12e-05
359	1.44e-07	1.82e-05	-1.56e-05	1.15e-05		359	1.44e-07	1.82e-05	-1.56e-05	1.15e-05
360	-7.86e-07	1.7e-05	-1.56e-05	1.11e-05		360	-7.86e-07	1.7e-05	-1.56e-05	1.11e-05
361	-5.53e-07	1.62e-05	-1.45e-05	1.07e-05		361	-5.53e-07	1.62e-05	-1.45e-05	1.07e-05
362	-3.21e-07	1.59e-05	-1.45e-05	9.7e-06		362	-3.21e-07	1.59e-05	-1.45e-05	9.7e-06
363	-2.18e-06	1.46e-05	-1.28e-05	1.03e-05		363	-2.18e-06	1.46e-05	-1.28e-05	1.03e-05
364	-2.18e-06	1.37e-05	-1.33e-05	1e-05		364	-2.18e-06	1.37e-05	-1.33e-05	1e-05
365	-3.81e-06	1.21e-05	-1.14e-05	9.86e-06		365	-3.81e-06	1.21e-05	-1.14e-05	9.86e-06
366	-3.58e-06	1.14e-05	-1.17e-05	9.54e-06		366	-3.58e-06	1.14e-05	-1.17e-05	9.54e-06
367	-4.27e-06	9.43e-06	-9.12e-06	9.7e-06		367	-4.27e-06	9.43e-06	-9.12e-06	9.7e-06
368	-4.04e-06	9.67e-06	-9.58e-06	8.98e-06		368	-4.04e-06	9.67e-06	-9.58e-06	8.98e-06
369	-5.9e-06	7.83e-06	-7.95e-06	9.46e-06		369	-5.9e-06	7.83e-06	-7.95e-06	9.46e-06
370	-6.37e-06	7.35e-06	-8.42e-06	9.54e-06		370	-6.37e-06	7.35e-06	-8.42e-06	9.54e-06
371	-7.3e-06	5.03e-06	-7.02e-06	9.94e-06		371	-7.3e-06	5.03e-06	-7.02e-06	9.94e-06
372	-7.06e-06	4.15e-06	-7.02e-06	1.01e-05		372	-7.06e-06	4.15e-06	-7.02e-06	1.01e-05
373	-6.83e-06	3.11e-06	-6.56e-06	1e-05		373	-6.83e-06	3.11e-06	-6.56e-06	1e-05
374	-6.37e-06	2.63e-06	-5.86e-06	9.62e-06		374	-6.37e-06	2.63e-06	-5.86e-06	9.62e-06
375	-6.37e-06	2.23e-06	-5.63e-06	9.46e-06		375	-6.37e-06	2.23e-06	-5.63e-06	9.46e-06
376	-6.6e-06	3.85e-07	-4.47e-06	9.94e-06		376	-6.6e-06	3.85e-07	-4.47e-06	9.94e-06
377	-6.37e-06	-2.56e-07	-4.7e-06	9.22e-06		377	-6.37e-06	-2.56e-07	-4.7e-06	9.22e-06
378	-6.6e-06	-1.94e-06	-2.84e-06	9.62e-06		378	-6.6e-06	-1.94e-06	-2.84e-06	9.62e-06
379	-5.9e-06	-1.86e-06	-4e-06	9.14e-06		379	-5.9e-06	-1.86e-06	-4e-06	9.14e-06
380	-4.27e-06	-2.58e-06	-2.14e-06	9.14e-06		380	-4.27e-06	-2.58e-06	-2.14e-06	9.14e-06
381	-3.11e-06	-2.66e-06	-2.61e-06	8.74e-06		381	-3.11e-06	-2.66e-06	-2.61e-06	8.74e-06
382	-4.74e-06	-4.26e-06	1.83e-07	8.98e-06		382	-4.74e-06	-4.26e-06	1.83e-07	8.98e-06
383	-2.88e-06	-3.7e-06	1.83e-07	9.38e-06		383	-2.88e-06	-3.7e-06	1.83e-07	9.38e-06
384	-3.34e-06	-4.34e-06	2.04e-06	9.46e-06		384	-3.34e-06	-4.34e-06	2.04e-06	9.46e-06
385	-2.65e-06	-3.46e-06	2.04e-06	9.22e-06		385	-2.65e-06	-3.46e-06	2.04e-06	9.22e-06
386	-3.58e-06	-3.62e-06	3.67e-06	8.98e-06		386	-3.58e-06	-3.62e-06	3.67e-06	8.98e-06
387	-2.41e-06	-2.98e-06	4.14e-06	8.66e-06		387	-2.41e-06	-2.98e-06	4.14e-06	8.66e-06
388	-2.41e-06	-3.06e-06	5.3e-06	8.82e-06		388	-2.41e-06	-3.06e-06	5.3e-06	8.82e-06
389	-2.18e-06	-2.98e-06	6.69e-06	9.06e-06		389	-2.18e-06	-2.98e-06	6.69e-06	9.06e-06
390	-2.88e-06	-2.74e-06	7.39e-06	9.14e-06		390	-2.88e-06	-2.74e-06	7.39e-06	9.14e-06
391	-3.34e-06	-1.7e-06	9.25e-06	8.9e-06		391	-3.34e-06	-1.7e-06	9.25e-06	8.9e-06
392	-4.04e-06	-9.76e-07	9.25e-06	7.94e-06		392	-4.04e-06	-9.76e-07	9.25e-06	7.94e-06
393	-4.04e-06	-1.54e-06	1.13e-05	8.02e-06		393	-4.04e-06	-1.54e-06	1.13e-05	8.02e-06
394	-3.58e-06	-8.16e-07	1.13e-05	7.46e-06		394	-3.58e-06	-8.16e-07	1.13e-05	7.46e-06
395	-4.51e-06	-1.7e-06	1.34e-05	7.7e-06		395	-4.51e-06	-1.7e-06	1.34e-05	7.7e-06
396	-4.27e-06	-4.16e-07	1.32e-05	7.06e-06		396	-4.27e-06	-4.16e-07	1.32e-05	7.06e-06
397	-6.13e-06	-6.56e-07	1.51e-05	7.62e-06		397	-6.13e-06	-6.56e-07	1.51e-05	7.62e-06
398	-5.2e-06	6.46e-08	1.46e-05	7.46e-06		398	-5.2e-06	6.46e-08	1.46e-05	7.46e-06
399	-5.2e-06	-1.54e-08	1.6e-05	7.78e-06		399	-5.2e-06	-1.54e-08	1.6e-05	7.78e-06
400	-4.97e-06	6.46e-08	1.65e-05	8.74e-06		400	-4.97e-06	6.46e-08	1.65e-05	8.74e-06
401	-5.9e-06	-8.96e-07	1.69e-05	8.5e-06		401	-5.9e-06	-8.96e-07	1.69e-05	8.5e-06
402	-6.83e-06	-1.94e-06	1.69e-05	8.34e-06		402	-6.83e-06	-1.94e-06	1.69e-05	8.34e-06
403	-2.45e-05	-2.42e-05	7.62e-06	-1.27e-06		403	-2.45e-05	-2.42e-05	7.62e-06	-1.27e-06
404	-4.98e-05	-6.17e-05	-8.42e-06	-1.91e-05		404	-4.98e-05	-6.17e-05	-8.42e-06	-1.91e-05
405	-4.01e-05	-5.15e-05	-4.23e-06	-1.87e-05		405	-4.01e-05	-5.15e-05	-4.23e-06	-1.87e-05
406	5.85e-05	8.17e-05	5.62e-05	3.96e-05		406	5.85e-05	8.17e-05	5.62e-05	3.96e-05
407	0.000284045	0.000397734	0.000207354	0.000197326		407	0.000284045	0.000397734	0.000207354	0.000197326
408	0.000647698	0.000903545	0.000474281	0.000489734		408	0.000647698	0.000903545	0.000474281	0.000489734
409	0.0011311	0.00157017	0.000863511	0.000936632		409	0.0011311	0.00157017	0.000863511	0.000936632
410	0.00169913	0.00236199	0.00137807	0.00154346		410	0.00169913	0.00236199	0.00137807	0.00154346
411	0.00231111	0.00322968	0.00199958	0.00229141		411	0.00231111	0.00322968	0.00199958	0.00229141
412	0.00292448	0.00410195	0.00271293	0.00315599		412	0.00292448	0.00410195	0.00271293	0.00315599
413	0.00350903	0.00492506	0.00348442	0.00410718		413	0.00350903	0.00492506	0.00348442	0.00410718
414	0.00398196	0.00558088	0.00421033	0.00504788		414	0.00398196	0.00558088	0.00421033	0.00504788
415	0.0042189	0.00589042	0.00480859	0.00588356		415	0.0042189	0.00589042	0.00480859	0.00588356
416	0.00422238	0.00584863	0.00528106	0.00659325		416	0.00422238	0.00584863	0.00528106	0.00659325
417	0.00404846	0.00553101	0.00562286	0.00714084		417	0.00404846	0.00553101	0.00562286	0.00714084
418	0.00373829	0.00501127	0.00584119	0.00735265		418	0.00373829	0.00501127	0.00584119	0.00735265
419	0.00333162	0.00434913	0.00594187	0.00741324		419	0.00333162	0.00434913	0.00594187	0.00741324
420	0.00285403	0.00359077	0.00593559	0.00742941		420	0.00285403	0.00359077	0.00593559	0.00742941
421	0.00233297	0.00277574	0.00583259	0.0074114		421	0.00233297	0.00277574	0.00583259	0.0074114
422	0.00178888	0.00193534	0.00564239	0.00736209		422	0.00178888	0.00193534	0.00564239	0.00736209
423	0.00123922	0.00109662	0.00538104	0.00726508		423	0.00123922	0.00109662	0.00538104	0.00726508
424	0.000699549	0.000282227	0.00505668	0.00708729		424	0.000699549	0.000282227	0.00505668	0.00708729
425	0.000180576	-0.000492699	0.0046828	0.00671444		425	0.000180576	-0.000492699	0.0046828	0.00671444
426	-0.000305845	-0.00121279	0.00426892	0.00619702		426	-0.000305845	-0.00121279	0.00426892	0.00619702
427	-0.000757157	-0.00187005	0.00382784	0.00562493		427	-0.000757157	-0.00187005	0.00382784	0.00562493
428	-0.00116499	-0.00245463	0.00336491	0.00501002		428	-0.00116499	-0.00245463	0.00336491	0.00501002
429	-0.00152841	-0.00296788	0.0028929	0.00436669		429	-0.00152841	-0.00296788	0.0028929	0.00436669
430	-0.001843	-0.0034039	0.00241601	0.00370511		430	-0.001843	-0.0034039	0.00241601	0.00370511
431	-0.00211272	-0.00376634	0.00194215	0.00303672		431	-0.00211272	-0.00376634	0.00194215	0.00303672
432	-0.00233407	-0.00405459	0.00147642	0.00236922		432	-0.00233407	-0.00405459	0.00147642	0.00236922
433	-0.00251241	-0.00427296	0.00102674	0.00171204		433	-0.00251241	-0.00427296	0.00102674	0.00171204
434	-0.00264704	-0.00442352	0.000592631	0.00107207		434	-0.00264704	-0.00442352	0.000592631	0.00107207
435	-0.00274144	-0.00451318	0.00018201	0.000454594		435	-0.00274144	-0.00451318	0.00018201	0.000454594
436	-0.00279701	-0.00454519	-0.000205593	-0.000134225		436	-0.00279701	-0.00454519	-0.000205593	-0.000134225
437	-0.0028184	-0.00452582	-0.000567618	-0.000691746		437	-0.0028184	-0.00452582	-0.000567618	-0.000691746
438	-0.00280817	-0.00445962	-0.000900812	-0.00121357		438	-0.00280817	-0.00445962	-0.000900812	-0.00121357
439	-0.0027705	-0.00435212	-0.00120657	-0.00169761		439	-0.0027705	-0.00435212	-0.00120657	-0.00169761
440	-0.00270819	-0.00420876	-0.00148163	-0.00214186		440	-0.00270819	-0.00420876	-0.00148163	-0.00214186
441	-0.00262239	-0.0040341	-0.00172763	-0.00254593		441	-0.00262239	-0.0040341	-0.00172763	-0.00254593
442	-0.00251939	-0.00383462	-0.00194294	-0.00290798		442	-0.00251939	-0.00383462	-0.00194294	-0.00290798
443	-0.00239871	-0.00361242	-0.00213035	-0.00322977		443	-0.00239871	-0.00361242	-0.00213035	-0.00322977
444	-0.00226781	-0.0033742	-0.00228846	-0.00350969		444	-0.00226781	-0.0033742	-0.00228846	-0.00350969
445	-0.00212411	-0.00312181	-0.00242076	-0.00374975		445	-0.00212411	-0.00312181	-0.00242076	-0.00374975
446	-0.00197484	-0.00286174	-0.00252493	-0.00395098		446	-0.00197484	-0.00286174	-0.00252493	-0.00395098
447	-0.00181766	-0.00259439	-0.00260724	-0.00411516		447	-0.00181766	-0.00259439	-0.00260724	-0.00411516
448	-0.00165862	-0.00232576	-0.00266374	-0.00424195		448	-0.00165862	-0.00232576	-0.00266374	-0.00424195
449	-0.00149586	-0.00205576	-0.00269955	-0.0043352		449	-0.00149586	-0.00205576	-0.00269955	-0.0043352
450	-0.00133519	-0.00178897	-0.0027142	-0.00439532		450	-0.00133519	-0.00178897	-0.0027142	-0.00439532
451	-0.00117475	-0.00152738	-0.00271001	-0.00442598		451	-0.00117475	-0.00152738	-0.00271001	-0.00442598
452	-0.00101757	-0.00127099	-0.00268862	-0.0044275		452	-0.00101757	-0.00127099	-0.00268862	-0.0044275
453	-0.000865741	-0.00102453	-0.00265304	-0.00440172		453	-0.000865741	-0.00102453	-0.00265304	-0.00440172
454	-0.000717629	-0.000786469	-0.00260189	-0.00435346		454	-0.000717629	-0.000786469	-0.00260189	-0.00435346
455	-0.000576027	-0.000559778	-0.00253958	-0.00428293		455	-0.000576027	-0.000559778	-0.00253958	-0.00428293
456	-0.000440006	-0.000343573	-0.00246727	-0.00419312		456	-0.000440006	-0.000343573	-0.00246727	-0.00419312
457	-0.000312356	-0.000141617	-0.00238403	-0.0040849		457	-0.000312356	-0.000141617	-0.00238403	-0.0040849
458	-0.000191215	4.9e-05	-0.00229311	-0.00396163		458	-0.000191215	4.9e-05	-0.00229311	-0.00396163
459	-7.89e-05	0.000225234	-0.00219406	-0.00382315		459	-7.89e-05	0.000225234	-0.00219406	-0.00382315
460	2.76e-05	0.000389249	-0.00209245	-0.00367434		460	2.76e-05	0.000389249	-0.00209245	-0.00367434
461	0.000123377	0.000538455	-0.0019834	-0.00351457		461	0.000123377	0.000538455	-0.0019834	-0.00351457
462	0.000213826	0.000675814	-0.00187342	-0.00334856		462	0.000213826	0.000675814	-0.00187342	-0.00334856
463	0.000294973	0.000798525	-0.00175902	-0.00317518		463	0.000294973	0.000798525	-0.00175902	-0.00317518
464	0.000368448	0.000909148	-0.00164579	-0.00299635		464	0.000368448	0.000909148	-0.00164579	-0.00299635
465	0.000432855	0.00100672	-0.00152953	-0.00281385		465	0.000432855	0.00100672	-0.00152953	-0.00281385
466	0.000490286	0.00109173	-0.0014149	-0.00262862		466	0.000490286	0.00109173	-0.0014149	-0.00262862
467	0.000540277	0.00116506	-0.00130027	-0.00244332		467	0.000540277	0.00116506	-0.00130027	-0.00244332
468	0.000583524	0.00122645	-0.00118611	-0.00225793		468	0.000583524	0.00122645	-0.00118611	-0.00225793
469	0.000619797	0.001278	-0.00107613	-0.0020739		469	0.000619797	0.001278	-0.00107613	-0.0020739
470	0.000650024	0.00131818	-0.000967079	-0.00189148		570	0.000420996	0.000479461	-0.000524603	-0.000706075
471	0.0006756	0.00134972	-0.000862447	-0.00171265		571	0.000433087	0.000483143	-0.000538089	-0.000686624
472	0.000692109	0.00137053	-0.000758281	-0.00153671		572	0.00044076	0.000483063	-0.00055204	-0.000669414
473	0.000705827	0.00138454	-0.000660392	-0.00136589		573	0.000446573	0.000480341	-0.000564131	-0.000651403
474	0.000714198	0.00138886	-0.000563433	-0.00119964		574	0.000448666	0.000474578	-0.000578546	-0.000636115
475	0.00071908	0.00138814	-0.000473682	-0.00104027		575	0.000447968	0.000464972	-0.000591567	-0.000621706
476	0.000718383	0.00137934	-0.000386024	-0.000886018		576	0.00044355	0.000453526	-0.000606448	-0.000609859
477	0.000715128	0.00136573	-0.000303714	-0.000738333		577	0.000436575	0.000438477	-0.000620399	-0.000598733
478	0.000707455	0.00134508	-0.000225124	-0.000596812		578	0.000426112	0.000421748	-0.00063714	-0.000590168
479	0.000698154	0.00132051	-0.000150719	-0.000462815		579	0.000414021	0.000400775	-0.000652021	-0.000583124
480	0.000684668	0.00129089	-8.17e-05	-0.000335461		580	0.000399838	0.000379643	-0.000670855	-0.000578962
481	0.000669322	0.00125879	-1.54e-05	-0.000215552		581	0.000384492	0.000355069	-0.000687131	-0.00057632
482	0.000652116	0.00122301	4.51e-05	-0.000102607		582	0.000367286	0.000330415	-0.000706895	-0.0005768
483	0.000633748	0.00118483	0.000102257	3.29e-06		583	0.000347289	0.000302399	-0.000724101	-0.000579202
484	0.000612124	0.0011444	0.00015434	0.000102231		584	0.000326828	0.000274623	-0.000744562	-0.000584405
485	0.00059143	0.0011007	0.000203169	0.000194444		585	0.000304506	0.000244606	-0.000763396	-0.000592249
486	0.000568643	0.00105691	0.000245951	0.000278572		586	0.000281953	0.000215549	-0.000782695	-0.000603136
487	0.000544229	0.00101153	0.000288502	0.000356858		587	0.000257073	0.000184891	-0.000802226	-0.000616183
488	0.00052121	0.000966141	0.000324076	0.000427138		588	0.000233822	0.000154634	-0.000821525	-0.000631712
489	0.000497261	0.000920035	0.000358721	0.000491975		589	0.000209873	0.000124696	-0.000839893	-0.000649803
490	0.000474475	0.000874328	0.00038732	0.000550649		590	0.000184529	9.46e-05	-0.000859192	-0.000669814
491	0.000450061	0.000827021	0.000416152	0.000603159		591	0.000160347	6.51e-05	-0.000879188	-0.000692067
492	0.000427274	0.000782195	0.000438474	0.000649506		592	0.000135468	3.55e-05	-0.000896394	-0.000716
493	0.000403325	0.000737209	0.000460563	0.00069033		593	0.000112217	8.47e-06	-0.000915228	-0.000741535
494	0.000382399	0.000693504	0.000477304	0.00072651		594	8.8e-05	-1.88e-05	-0.000930574	-0.00076787
495	0.000359147	0.000650759	0.00049358	0.000757809		595	6.62e-05	-4.34e-05	-0.000947083	-0.000795966
496	0.000338919	0.000608735	0.000508693	0.000784624		596	4.43e-05	-6.88e-05	-0.000960336	-0.000824383
497	0.000318457	0.000569032	0.000520784	0.000806717		597	2.39e-05	-9e-05	-0.000975682	-0.00085384
498	0.000298694	0.00053021	0.000531247	0.000825688		598	2.93e-06	-0.000110959	-0.000987308	-0.000882817
499	0.000279395	0.000493709	0.000538688	0.000840176		599	-1.47e-05	-0.00012913	-0.000999398	-0.000912514
500	0.000261956	0.000458169	0.000547058	0.000852423		600	-3.33e-05	-0.00014602	-0.00100823	-0.000941491
501	0.00024475	0.00042511	0.000551709	0.000860828		601	-4.8e-05	-0.000160988	-0.0010173	-0.000969987
502	0.000228242	0.000392451	0.000557521	0.000867712		602	-6.45e-05	-0.000174916	-0.00102381	-0.000998483
503	0.000214058	0.000363154	0.000559846	0.000871154		603	-7.73e-05	-0.000187884	-0.00102893	-0.00102578
504	0.000190342	0.000328814	0.000562637	0.000871554		604	-9.03e-05	-0.00019853	-0.00103288	-0.00105203
505	0.000164765	0.000292313	0.000561707	0.000867632		605	-0.000102627	-0.000208776	-0.00103544	-0.00107653
506	0.000156395	0.000268379	0.000564032	0.000865871		606	-0.000113788	-0.00021702	-0.00103846	-0.00110102
507	0.00019941	0.000281267	0.000571472	0.000873955		607	-0.000125414	-0.000226546	-0.00103637	-0.00112312
508	0.000309157	0.000346264	0.000588213	0.000903092		608	-0.000134714	-0.00023367	-0.0010366	-0.00114513
509	0.000495634	0.000470736	0.000617975	0.000961366		609	-0.000144247	-0.000242475	-0.00103218	-0.00116458
510	0.000748145	0.000645797	0.000662386	0.00105374		610	-0.00015192	-0.000248719	-0.00103032	-0.00118371
511	0.00104902	0.00086088	0.000721444	0.00118157		611	-0.000161221	-0.000256803	-0.00102404	-0.00120052
512	0.00137454	0.00109846	0.000792361	0.00134254		612	-0.000168894	-0.000262887	-0.00101916	-0.00121685
513	0.00170192	0.001339	0.000876067	0.00152929		613	-0.000176799	-0.000269931	-0.00101172	-0.0012315
514	0.00201582	0.00156881	0.000965817	0.00173605		614	-0.000183775	-0.000276895	-0.00100451	-0.00124567
515	0.00226949	0.00175604	0.00105301	0.00194377		615	-0.000192145	-0.000283379	-0.000996143	-0.00125823
516	0.0023983	0.00184793	0.00112346	0.00212868		616	-0.000198423	-0.000289622	-0.00098754	-0.00126984
517	0.0023997	0.00183968	0.00118229	0.00228501		617	-0.000206096	-0.000295546	-0.000977077	-0.00128073
518	0.00230576	0.0017534	0.00122321	0.00240412		618	-0.000213072	-0.000301549	-0.000967544	-0.00129049
519	0.00213812	0.00161003	0.00125367	0.0024507		619	-0.000221442	-0.000307793	-0.000957778	-0.0013005
520	0.00191862	0.00142625	0.00126692	0.00245158		620	-0.00022865	-0.000312836	-0.000947083	-0.0013089
521	0.00165821	0.00121364	0.00126902	0.00244222		621	-0.000235858	-0.000318279	-0.00093755	-0.00131803
522	0.00137501	0.000984792	0.00125693	0.00243037		622	-0.000243531	-0.000323162	-0.000927086	-0.00132643
523	0.00107762	0.000746895	0.00123646	0.00241444		623	-0.000250739	-0.000327244	-0.000917553	-0.00133492
524	0.000779999	0.000509718	0.00120461	0.00239299		624	-0.000259342	-0.000331486	-0.00090709	-0.00134252
525	0.000484706	0.000277745	0.00116601	0.00234816		625	-0.000265388	-0.000334928	-0.000900347	-0.00135173
526	0.000203595	5.8e-05	0.00112044	0.00225331		626	-0.000273758	-0.000339011	-0.000891047	-0.00135989
527	-6.26e-05	-0.000147781	0.00106882	0.00212459		627	-0.000279571	-0.000341332	-0.000884769	-0.00136998
528	-0.000307938	-0.000335969	0.00101278	0.00198259		628	-0.000287476	-0.000343733	-0.000877328	-0.0013799
529	-0.00053092	-0.000504306	0.000953262	0.00182923		629	-0.000292824	-0.000344614	-0.000872213	-0.00139127
530	-0.00072879	-0.000652952	0.000890715	0.00166889		630	-0.000300032	-0.000346695	-0.00086733	-0.00140296
531	-0.000899921	-0.000777744	0.000827239	0.00150296		631	-0.000303985	-0.000347416	-0.000864075	-0.00141592
532	-0.00104617	-0.000882844	0.000763762	0.00133454		632	-0.000309333	-0.000348136	-0.000862447	-0.00143065
533	-0.00116592	-0.000965051	0.000697728	0.00116468		633	-0.000313518	-0.000347896	-0.000861517	-0.00144658
534	-0.00126171	-0.00102901	0.000635181	0.000996826		634	-0.000315611	-0.000346695	-0.00086175	-0.00146339
535	-0.0013331	-0.00107239	0.000571007	0.000831451		635	-0.000320029	-0.000346455	-0.000863145	-0.00148092
536	-0.00138285	-0.00109945	0.000509856	0.000670638		636	-0.000321191	-0.000344854	-0.000867795	-0.00150069
537	-0.00141029	-0.00110817	0.000448239	0.000514949		637	-0.000323516	-0.000343894	-0.00087012	-0.00152086
538	-0.00142006	-0.00110233	0.000390343	0.000365743		638	-0.000323051	-0.000342293	-0.000876398	-0.00154352
539	-0.00141215	-0.00108192	0.000333377	0.000223901		639	-0.000323284	-0.000340292	-0.000881513	-0.00156657
540	-0.00138867	-0.00105046	0.000279899	9.01e-05		640	-0.000322121	-0.00033749	-0.000889651	-0.00159066
541	-0.00135239	-0.00100804	0.00022921	-3.5e-05		641	-0.000321424	-0.000336209	-0.000895929	-0.00161604
542	-0.0013031	-0.000956246	0.000178987	-0.000151355		642	-0.000318401	-0.000333568	-0.00090616	-0.00164197
543	-0.00124474	-0.000897172	0.000132949	-0.000258617		643	-0.000317471	-0.000331807	-0.000914531	-0.00166919
544	-0.00117778	-0.000831775	8.81e-05	-0.000357314		644	-0.000314448	-0.000329725	-0.000924529	-0.00169705
545	-0.00110407	-0.000761894	4.74e-05	-0.000445765		645	-0.000312123	-0.000327804	-0.000933132	-0.00172522
546	-0.00102432	-0.000687692	6.93e-06	-0.000526291		646	-0.000308868	-0.000325483	-0.00094499	-0.0017546
547	-0.000940611	-0.000612128	-2.98e-05	-0.000596892		647	-0.000305845	-0.000324602	-0.000957081	-0.00178382
548	-0.000853883	-0.000534883	-6.7e-05	-0.000659968		648	-0.000303985	-0.000323642	-0.000969404	-0.00181455
549	-0.000767155	-0.000458039	-9.98e-05	-0.000713759		649	-0.00030073	-0.000322841	-0.000980565	-0.00184505
550	-0.000678799	-0.000380555	-0.000132583	-0.000760746		650	-0.000297707	-0.000323082	-0.000992423	-0.00187595
551	-0.000591838	-0.000305792	-0.000161647	-0.000799088		651	-0.000294684	-0.000322681	-0.00100451	-0.00190757
552	-0.000504413	-0.000231509	-0.000189549	-0.000830867		652	-0.000292592	-0.000323722	-0.00101637	-0.00193878
553	-0.00042094	-0.000160828	-0.000215358	-0.000856081		653	-0.000289104	-0.000324202	-0.00102986	-0.00197096
554	-0.000337932	-9.21e-05	-0.000239772	-0.000874492		654	-0.000287942	-0.000326363	-0.00104125	-0.0020037
555	-0.000259342	-2.71e-05	-0.000263024	-0.000886899		655	-0.000285849	-0.000327724	-0.00105474	-0.0020366
556	-0.000183775	3.5e-05	-0.000285578	-0.000894744		656	-0.000285384	-0.000331566	-0.00106613	-0.00207054
557	-0.000112625	9.27e-05	-0.000307667	-0.000897865		657	-0.000282826	-0.000333488	-0.00107985	-0.00210424
558	-4.57e-05	0.000146469	-0.000327663	-0.000896665		658	-0.000282594	-0.00033733	-0.00109124	-0.00213842
559	1.78e-05	0.000196578	-0.000347892	-0.000891382		659	-0.000282129	-0.000340692	-0.00110612	-0.00217348
560	7.71e-05	0.000241724	-0.000366725	-0.000882336		660	-0.000282129	-0.000345735	-0.00111961	-0.00220966
561	0.000131515	0.000284228	-0.000385094	-0.00087161		661	-0.000283059	-0.000350778	-0.00113542	-0.0022468
562	0.000181506	0.00032121	-0.0004023	-0.000856722		662	-0.000284221	-0.000357341	-0.0011503	-0.0022845
563	0.000227544	0.000355389	-0.000419971	-0.000841673		663	-0.000285616	-0.000364145	-0.00116472	-0.00232285
564	0.000267072	0.000383566	-0.000436015	-0.000824543		664	-0.000287476	-0.000370549	-0.00118216	-0.00236279
565	0.000303111	0.000409901	-0.000452988	-0.000805732		665	-0.000288872	-0.000378634	-0.0011982	-0.00240393
566	0.000334268	0.000430393	-0.000468567	-0.000786041		666	-0.000293057	-0.000385277	-0.00121843	-0.00244636
567	0.000362868	0.000448483	-0.000483215	-0.000765869		667	-0.000296777	-0.000393842	-0.00123726	-0.0024895
568	0.000385654	0.000462091	-0.000496934	-0.000745858		668	-0.000300032	-0.000402167	-0.00125842	-0.00253385
569	0.000406348	0.000472817	-0.000511582	-0.000725686		669	-0.000305148	-0.000411132	-0.00127818	-0.00257931
570	0.000420996	0.000479461	-0.000524603	-0.000706075		670	-0.000308868	-0.000419697	-0.00130283	-0.00262638
571	0.000433087	0.000483143	-0.000538089	-0.000686624		671	-0.000314913	-0.000429463	-0.00132585	-0.00267473
572	0.00044076	0.000483063	-0.00055204	-0.000669414		672	-0.000318168	-0.000438268	-0.00135166	-0.00272492
573	0.000446573	0.000480341	-0.000564131	-0.000651403		673	-0.000326074	-0.000448114	-0.00137677	-0.00277575
574	0.000448666	0.000474578	-0.000578546	-0.000636115		674	-0.000330957	-0.000457799	-0.00140583	-0.00282914
575	0.000447968	0.000464972	-0.000591567	-0.000621706		675	-0.00033863	-0.000467885	-0.00143374	-0.00288349
576	0.00044355	0.000453526	-0.000606448	-0.000609859		676	-0.000344443	-0.000477891	-0.00146466	-0.00293936
577	0.000436575	0.000438477	-0.000620399	-0.000598733		677	-0.000351418	-0.000488697	-0.00149582	-0.00299708
578	0.000426112	0.000421748	-0.00063714	-0.000590168		678	-0.000358859	-0.000499503	-0.00152767	-0.00305623
579	0.000414021	0.000400775	-0.000652021	-0.000583124		679	-0.000367927	-0.00051119	-0.00156139	-0.00311706
580	0.000399838	0.000379643	-0.000670855	-0.000578962		680	-0.000376762	-0.000523517	-0.0015944	-0.00317934
581	0.000384492	0.000355069	-0.000687131	-0.00057632		681	-0.000387458	-0.000535524	-0.00162998	-0.00324394
582	0.000367286	0.000330415	-0.000706895	-0.0005768		682	-0.000397921	-0.000548171	-0.00166486	-0.00330861
583	0.000347289	0.000302399	-0.000724101	-0.000579202		683	-0.000406524	-0.000560578	-0.00170276	-0.00337545
584	0.000326828	0.000274623	-0.000744562	-0.000584405		684	-0.000418847	-0.000574346	-0.00173787	-0.00344221
585	0.000304506	0.000244606	-0.000763396	-0.000592249		685	-0.000428148	-0.000587954	-0.001776	-0.00351169
586	0.000281953	0.000215549	-0.000782695	-0.000603136		686	-0.000440936	-0.000602442	-0.00181181	-0.00358149
587	0.000257073	0.000184891	-0.000802226	-0.000616183		687	-0.000451632	-0.00061621	-0.00185087	-0.00365249
588	0.000233822	0.000154634	-0.000821525	-0.000631712		688	-0.00046442	-0.000630619	-0.00188737	-0.00372413
589	0.000209873	0.000124696	-0.000839893	-0.000649803		689	-0.000476744	-0.000644547	-0.00192713	-0.00379657
590	0.000184529	9.46e-05	-0.000859192	-0.000669814		690	-0.000489067	-0.000659916	-0.00196526	-0.00387038
591	0.000160347	6.51e-05	-0.000879188	-0.000692067		691	-0.000502088	-0.000675044	-0.00200503	-0.00394514
592	0.000135468	3.55e-05	-0.000896394	-0.000716		692	-0.000514876	-0.000690893	-0.00204385	-0.0040203
593	0.000112217	8.47e-06	-0.000915228	-0.000741535		693	-0.000529059	-0.000706663	-0.00208222	-0.00409579
594	8.8e-05	-1.88e-05	-0.000930574	-0.00076787		694	-0.000542778	-0.000722111	-0.00212198	-0.00417199
595	6.62e-05	-4.34e-05	-0.000947083	-0.000795966		695	-0.000556729	-0.00073748	-0.00216011	-0.00424835
596	4.43e-05	-6.88e-05	-0.000960336	-0.000824383		696	-0.00057161	-0.000752929	-0.00219917	-0.00432464
597	2.39e-05	-9e-05	-0.000975682	-0.00085384		697	-0.000586723	-0.000768458	-0.00223661	-0.00440076
598	2.93e-06	-0.000110959	-0.000987308	-0.000882817		698	-0.000601604	-0.000784227	-0.00227521	-0.00447761
599	-1.47e-05	-0.00012913	-0.000999398	-0.000912514		699	-0.000617648	-0.000800236	-0.00231171	-0.00455237
600	-3.33e-05	-0.00014602	-0.00100823	-0.000941491		700	-0.000631366	-0.000815125	-0.00234938	-0.00462825
601	-4.8e-05	-0.000160988	-0.0010173	-0.000969987		701	-0.000648107	-0.000831134	-0.00238426	-0.00470278
602	-6.45e-05	-0.000174916	-0.00102381	-0.000998483		702	-0.000662523	-0.000845302	-0.00242216	-0.00477786
603	-7.73e-05	-0.000187884	-0.00102893	-0.00102578		703	-0.000677404	-0.000860351	-0.0024568	-0.0048515
604	-9.03e-05	-0.00019853	-0.00103288	-0.00105203		704	-0.00069089	-0.000875	-0.002494	-0.00492418
605	-0.000102627	-0.000208776	-0.00103544	-0.00107653		705	-0.000705771	-0.000890528	-0.00252818	-0.00499679
606	-0.000113788	-0.00021702	-0.00103846	-0.00110102		706	-0.000720419	-0.000904616	-0.00256329	-0.00506795
607	-0.000125414	-0.000226546	-0.00103637	-0.00112312		707	-0.000734835	-0.000920145	-0.00259654	-0.00513807
608	-0.000134714	-0.00023367	-0.0010366	-0.00114513		708	-0.000748089	-0.000934474	-0.00262979	-0.00520739
609	-0.000144247	-0.000242475	-0.00103218	-0.00116458		709	-0.000762737	-0.000949282	-0.00266165	-0.00527503
610	-0.00015192	-0.000248719	-0.00103032	-0.00118371		710	-0.00077506	-0.000964571	-0.00269374	-0.00534099
611	-0.000161221	-0.000256803	-0.00102404	-0.00120052		711	-0.000788546	-0.000978979	-0.00272489	-0.0054055
612	-0.000168894	-0.000262887	-0.00101916	-0.00121685		712	-0.000802032	-0.000994028	-0.00275419	-0.00546802
613	-0.000176799	-0.000269931	-0.00101172	-0.0012315		713	-0.000815053	-0.0010082	-0.00278511	-0.00552957
614	-0.000183775	-0.000276895	-0.00100451	-0.00124567		714	-0.000828771	-0.00102388	-0.00281162	-0.00558873
615	-0.000192145	-0.000283379	-0.000996143	-0.00125823		715	-0.000840164	-0.00103853	-0.00283975	-0.00564708
616	-0.000198423	-0.000289622	-0.00098754	-0.00126984		716	-0.00085365	-0.00105438	-0.00286533	-0.00570263
617	-0.000206096	-0.000295546	-0.000977077	-0.00128073		717	-0.000865043	-0.00106911	-0.002893	-0.00575698
618	-0.000213072	-0.000301549	-0.000967544	-0.00129049		718	-0.000878994	-0.00108504	-0.00291695	-0.00580949
619	-0.000221442	-0.000307793	-0.000957778	-0.0013005		719	-0.00089062	-0.00109961	-0.00294229	-0.00586072
620	-0.00022865	-0.000312836	-0.000947083	-0.0013089		720	-0.000905269	-0.00111562	-0.00296554	-0.00590987
621	-0.000235858	-0.000318279	-0.00093755	-0.00131803		721	-0.000917127	-0.00113075	-0.00298973	-0.00595726
622	-0.000243531	-0.000323162	-0.000927086	-0.00132643		722	-0.000930845	-0.00114644	-0.00301158	-0.00600401
623	-0.000250739	-0.000327244	-0.000917553	-0.00133492		723	-0.000943168	-0.00116308	-0.00303483	-0.00604875
624	-0.000259342	-0.000331486	-0.00090709	-0.00134252		724	-0.000957817	-0.00117837	-0.00305739	-0.00609254
625	-0.000265388	-0.000334928	-0.000900347	-0.00135173		725	-0.000971303	-0.00119502	-0.00307924	-0.00613472
626	-0.000273758	-0.000339011	-0.000891047	-0.00135989		726	-0.000985486	-0.00121103	-0.0031004	-0.00617578
627	-0.000279571	-0.000341332	-0.000884769	-0.00136998		727	-0.000999437	-0.00122808	-0.0031211	-0.00621549
628	-0.000287476	-0.000343733	-0.000877328	-0.0013799		728	-0.00101385	-0.00124465	-0.00314388	-0.00625423
629	-0.000292824	-0.000344614	-0.000872213	-0.00139127		729	-0.00102897	-0.0012625	-0.00316434	-0.00629169
630	-0.000300032	-0.000346695	-0.00086733	-0.00140296		730	-0.00104199	-0.00127899	-0.00318667	-0.00632843
631	-0.000303985	-0.000347416	-0.000864075	-0.00141592		731	-0.00105617	-0.00129636	-0.00320666	-0.00636381
632	-0.000309333	-0.000348136	-0.000862447	-0.00143065		732	-0.00107035	-0.00131277	-0.00322759	-0.00639919
633	-0.000313518	-0.000347896	-0.000861517	-0.00144658		733	-0.00108523	-0.00133038	-0.00324689	-0.00643209
634	-0.000315611	-0.000346695	-0.00086175	-0.00146339		734	-0.00109779	-0.00134719	-0.00326851	-0.00646539
635	-0.000320029	-0.000346455	-0.000863145	-0.00148092		735	-0.00111128	-0.00136432	-0.00328758	-0.00649749
636	-0.000321191	-0.000344854	-0.000867795	-0.00150069		736	-0.00112383	-0.00137993	-0.00330827	-0.00652887
637	-0.000323516	-0.000343894	-0.00087012	-0.00152086		737	-0.00113755	-0.00139674	-0.00332664	-0.00655857
638	-0.000323051	-0.000342293	-0.000876398	-0.00154352		738	-0.00115011	-0.00141323	-0.0033471	-0.00658802
639	-0.000323284	-0.000340292	-0.000881513	-0.00156657		739	-0.00116336	-0.00142964	-0.0033664	-0.00661652
640	-0.000322121	-0.00033749	-0.000889651	-0.00159066		740	-0.00117568	-0.00144565	-0.00338663	-0.00664366
641	-0.000321424	-0.000336209	-0.000895929	-0.00161604		741	-0.0011887	-0.00146198	-0.00340825	-0.00667047
642	-0.000318401	-0.000333568	-0.00090616	-0.00164197		742	-0.00119987	-0.00147799	-0.00342685	-0.00669584
643	-0.000317471	-0.000331807	-0.000914531	-0.00166919		743	-0.00121172	-0.00149312	-0.00344731	-0.00672114
644	-0.000314448	-0.000329725	-0.000924529	-0.00169705		744	-0.00122474	-0.00150936	-0.00346638	-0.00674419
645	-0.000312123	-0.000327804	-0.000933132	-0.00172522		745	-0.00123637	-0.00152505	-0.00348754	-0.00676741
646	-0.000308868	-0.000325483	-0.00094499	-0.0017546		746	-0.00124892	-0.00154138	-0.00350661	-0.00678934
647	-0.000305845	-0.000324602	-0.000957081	-0.00178382		747	-0.00126032	-0.00155731	-0.00352986	-0.00681095
648	-0.000303985	-0.000323642	-0.000969404	-0.00181455		748	-0.00127287	-0.0015734	-0.00354916	-0.00683088
649	-0.00030073	-0.000322841	-0.000980565	-0.00184505		749	-0.0012838	-0.00158941	-0.00357032	-0.00685025
650	-0.000297707	-0.000323082	-0.000992423	-0.00187595		750	-0.00129706	-0.00160694	-0.00358868	-0.00686906
651	-0.000294684	-0.000322681	-0.00100451	-0.00190757		751	-0.00130868	-0.00162295	-0.00361031	-0.00688715
652	-0.000292592	-0.000323722	-0.00101637	-0.00193878		752	-0.00132077	-0.00164	-0.00362937	-0.00690389
653	-0.000289104	-0.000324202	-0.00102986	-0.00197096		753	-0.00133193	-0.00165593	-0.0036503	-0.00692086
654	-0.000287942	-0.000326363	-0.00104125	-0.0020037		754	-0.00134379	-0.00167218	-0.00367076	-0.0069367
655	-0.000285849	-0.000327724	-0.00105474	-0.0020366		755	-0.00135519	-0.00168915	-0.00369099	-0.00695239
656	-0.000285384	-0.000331566	-0.00106613	-0.00207054		756	-0.00136704	-0.001705	-0.00371122	-0.0069672
657	-0.000282826	-0.000333488	-0.00107985	-0.00210424		757	-0.00137867	-0.00172125	-0.00373029	-0.00698169
658	-0.000282594	-0.00033733	-0.00109124	-0.00213842		758	-0.00139029	-0.00173654	-0.00374982	-0.00699562
659	-0.000282129	-0.000340692	-0.00110612	-0.00217348		759	-0.00140122	-0.00175231	-0.00376935	-0.00700891
660	-0.000282129	-0.000345735	-0.00111961	-0.00220966		760	-0.00141262	-0.00176703	-0.00379051	-0.00702179
661	-0.000283059	-0.000350778	-0.00113542	-0.0022468		761	-0.00142285	-0.00178192	-0.00380864	-0.00703468
662	-0.000284221	-0.000357341	-0.0011503	-0.0022845		762	-0.00143447	-0.00179553	-0.0038298	-0.00704709
663	-0.000285616	-0.000364145	-0.00116472	-0.00232285		763	-0.00144587	-0.00181042	-0.00384794	-0.00705861
664	-0.000287476	-0.000370549	-0.00118216	-0.00236279		764	-0.00145703	-0.00182339	-0.0038691	-0.00707078
665	-0.000288872	-0.000378634	-0.0011982	-0.00240393		765	-0.00146795	-0.00183675	-0.0038884	-0.00708239
666	-0.000293057	-0.000385277	-0.00121843	-0.00244636		766	-0.00147772	-0.00184892	-0.00390862	-0.00709351
667	-0.000296777	-0.000393842	-0.00123726	-0.0024895		767	-0.00148981	-0.00186149	-0.00392909	-0.00710456
668	-0.000300032	-0.000402167	-0.00125842	-0.00253385		768	-0.00149981	-0.00187285	-0.00395001	-0.00711609
669	-0.000305148	-0.000411132	-0.00127818	-0.00257931		769	-0.00151097	-0.0018847	-0.00397071	-0.00712769
670	-0.000308868	-0.000419697	-0.00130283	-0.00262638		770	-0.0015212	-0.00189607	-0.00399094	-0.00713882
671	-0.000314913	-0.000429463	-0.00132585	-0.00267473		771	-0.00153166	-0.00190743	-0.00401302	-0.00715019
672	-0.000318168	-0.000438268	-0.00135166	-0.00272492		772	-0.0015412	-0.00191904	-0.00403465	-0.00716123
673	-0.000326074	-0.000448114	-0.00137677	-0.00277575		773	-0.00155073	-0.00192833	-0.00405604	-0.00717244
674	-0.000330957	-0.000457799	-0.00140583	-0.00282914		774	-0.00156096	-0.00193905	-0.0040779	-0.00718285
675	-0.00033863	-0.000467885	-0.00143374	-0.00288349		775	-0.00156933	-0.00194898	-0.00409952	-0.00719437
676	-0.000344443	-0.000477891	-0.00146466	-0.00293936		776	-0.0015791	-0.00195938	-0.00412021	-0.00720454
677	-0.000351418	-0.000488697	-0.00149582	-0.00299708		777	-0.0015877	-0.00196867	-0.00414277	-0.00721414
678	-0.000358859	-0.000499503	-0.00152767	-0.00305623		778	-0.0015977	-0.00197868	-0.00416369	-0.00722351
679	-0.000367927	-0.00051119	-0.00156139	-0.00311706		779	-0.00160607	-0.00198652	-0.00418485	-0.00723303
680	-0.000376762	-0.000523517	-0.0015944	-0.00317934		780	-0.00161514	-0.00199597	-0.00420578	-0.00724136
681	-0.000387458	-0.000535524	-0.00162998	-0.00324394		781	-0.00162281	-0.00200381	-0.0042267	-0.00725009
682	-0.000397921	-0.000548171	-0.00166486	-0.00330861		782	-0.00163211	-0.00201342	-0.00424856	-0.00725849
683	-0.000406524	-0.000560578	-0.00170276	-0.00337545		783	-0.00164164	-0.0020219	-0.00427019	-0.00726698
684	-0.000418847	-0.000574346	-0.00173787	-0.00344221		784	-0.00165094	-0.00203078	-0.00429065	-0.00727466
685	-0.000428148	-0.000587954	-0.001776	-0.00351169		785	-0.00166024	-0.00203967	-0.00430971	-0.0072825
686	-0.000440936	-0.000602442	-0.00181181	-0.00358149		786	-0.00166908	-0.00204776	-0.00432971	-0.00729003
687	-0.000451632	-0.00061621	-0.00185087	-0.00365249		787	-0.00167861	-0.00205744	-0.00434924	-0.00729707
688	-0.00046442	-0.000630619	-0.00188737	-0.00372413		788	-0.00168815	-0.00206665	-0.00436947	-0.00730492
689	-0.000476744	-0.000644547	-0.00192713	-0.00379657		789	-0.00169931	-0.00207721	-0.00438877	-0.00731148
690	-0.000489067	-0.000659916	-0.00196526	-0.00387038		790	-0.00170954	-0.00208714	-0.00440969	-0.0073186
691	-0.000502088	-0.000675044	-0.00200503	-0.00394514		791	-0.00172163	-0.00209754	-0.00442806	-0.00732477
692	-0.000514876	-0.000690893	-0.00204385	-0.0040203		792	-0.00173232	-0.00210771	-0.00444969	-0.00733149
693	-0.000529059	-0.000706663	-0.00208222	-0.00409579		793	-0.00174581	-0.002119	-0.00446759	-0.00733701
694	-0.000542778	-0.000722111	-0.00212198	-0.00417199		794	-0.00175767	-0.0021306	-0.00448805	-0.00734294
695	-0.000556729	-0.00073748	-0.00216011	-0.00424835		795	-0.00177092	-0.00214325	-0.00450689	-0.00734838
696	-0.00057161	-0.000752929	-0.00219917	-0.00432464		796	-0.00178441	-0.00215566	-0.00452758	-0.00735447
697	-0.000586723	-0.000768458	-0.00223661	-0.00440076		797	-0.00179975	-0.00216919	-0.00454758	-0.00735975
698	-0.000601604	-0.000784227	-0.00227521	-0.00447761		798	-0.0018144	-0.00218311	-0.00456711	-0.00736415
699	-0.000617648	-0.000800236	-0.00231171	-0.00455237		799	-0.00183044	-0.00219696	-0.0045864	-0.00736879
700	-0.000631366	-0.000815125	-0.00234938	-0.00462825		800	-0.00184579	-0.00221225	-0.0046057	-0.00737256
701	-0.000648107	-0.000831134	-0.00238426	-0.00470278		801	-0.00186184	-0.00222738	-0.00462431	-0.00737688
702	-0.000662523	-0.000845302	-0.00242216	-0.00477786		802	-0.00187834	-0.00224499	-0.00464407	-0.00737992
703	-0.000677404	-0.000860351	-0.0024568	-0.0048515		803	-0.00189532	-0.00226148	-0.00466383	-0.0073832
704	-0.00069089	-0.000875	-0.002494	-0.00492418		804	-0.00191252	-0.00228013	-0.00468197	-0.00738544
705	-0.000705771	-0.000890528	-0.00252818	-0.00499679		805	-0.00192973	-0.00229766	-0.00470127	-0.0073876
706	-0.000720419	-0.000904616	-0.00256329	-0.00506795		806	-0.00194787	-0.00231663	-0.00471871	-0.00738928
707	-0.000734835	-0.000920145	-0.00259654	-0.00513807		807	-0.00196437	-0.00233512	-0.00473824	-0.00739072
708	-0.000748089	-0.000934474	-0.00262979	-0.00520739		808	-0.00198251	-0.00235569	-0.00475498	-0.00739073
709	-0.000762737	-0.000949282	-0.00266165	-0.00527503		809	-0.00199925	-0.0023749	-0.00477405	-0.00739089
710	-0.00077506	-0.000964571	-0.00269374	-0.00534099		810	-0.00201716	-0.00239564	-0.00479032	-0.00739056
711	-0.000788546	-0.000978979	-0.00272489	-0.0054055		811	-0.00203529	-0.00241565	-0.00480915	-0.00739016
712	-0.000802032	-0.000994028	-0.00275419	-0.00546802		812	-0.00205366	-0.00243614	-0.0048245	-0.00738808
713	-0.000815053	-0.0010082	-0.00278511	-0.00552957		813	-0.00207017	-0.00245575	-0.0048431	-0.00738664
714	-0.000828771	-0.00102388	-0.00281162	-0.00558873		814	-0.00208761	-0.00247616	-0.00485914	-0.0073844
715	-0.000840164	-0.00103853	-0.00283975	-0.00564708		815	-0.00210365	-0.00249697	-0.00487635	-0.0073824
716	-0.00085365	-0.00105438	-0.00286533	-0.00570263		816	-0.00212039	-0.00251682	-0.00489263	-0.0073796
717	-0.000865043	-0.00106911	-0.002893	-0.00575698		817	-0.00213806	-0.00253668	-0.00490797	-0.00737656
718	-0.000878994	-0.00108504	-0.00291695	-0.00580949		818	-0.00215411	-0.00255613	-0.00492402	-0.00737383
719	-0.00089062	-0.00109961	-0.00294229	-0.00586072		819	-0.00217038	-0.00257614	-0.0049396	-0.00736927
720	-0.000905269	-0.00111562	-0.00296554	-0.00590987		820	-0.00218456	-0.00259527	-0.00495657	-0.00736607
721	-0.000917127	-0.00113075	-0.00298973	-0.00595726		821	-0.00220084	-0.00261568	-0.00497006	-0.00736167
722	-0.000930845	-0.00114644	-0.00301158	-0.00600401		822	-0.00221479	-0.00263409	-0.00498587	-0.00735775
723	-0.000943168	-0.00116308	-0.00303483	-0.00604875		823	-0.0022306	-0.00265402	-0.00500005	-0.00735254
724	-0.000957817	-0.00117837	-0.00305739	-0.00609254		824	-0.00224479	-0.0026722	-0.00501586	-0.00734718
725	-0.000971303	-0.00119502	-0.00307924	-0.00613472		825	-0.0022606	-0.00269109	-0.00503074	-0.00734166
726	-0.000985486	-0.00121103	-0.0031004	-0.00617578		826	-0.00227315	-0.00270878	-0.00504539	-0.00733629
727	-0.000999437	-0.00122808	-0.0031211	-0.00621549		827	-0.0022878	-0.00272775	-0.00505888	-0.00733021
728	-0.00101385	-0.00124465	-0.00314388	-0.00625423		828	-0.00230036	-0.00274504	-0.00507399	-0.00732445
729	-0.00102897	-0.0012625	-0.00316434	-0.00629169		829	-0.00231477	-0.00276361	-0.00508771	-0.00731796
730	-0.00104199	-0.00127899	-0.00318667	-0.00632843		830	-0.00232756	-0.0027805	-0.00510073	-0.00731108
731	-0.00105617	-0.00129636	-0.00320666	-0.00636381		831	-0.00234128	-0.00279707	-0.00511445	-0.00730404
732	-0.00107035	-0.00131277	-0.00322759	-0.00639919		832	-0.00235453	-0.00281452	-0.00512723	-0.00729723
733	-0.00108523	-0.00133038	-0.00324689	-0.00643209		833	-0.00236732	-0.00283029	-0.00514072	-0.00729027
734	-0.00109779	-0.00134719	-0.00326851	-0.00646539		834	-0.00238058	-0.00284733	-0.00515142	-0.00728274
735	-0.00111128	-0.00136432	-0.00328758	-0.00649749		835	-0.00239383	-0.00286254	-0.0051649	-0.00727522
736	-0.00112383	-0.00137993	-0.00330827	-0.00652887		836	-0.00240732	-0.00287895	-0.00517537	-0.00726665
737	-0.00113755	-0.00139674	-0.00332664	-0.00655857		837	-0.00241964	-0.00289352	-0.00518676	-0.00725761
738	-0.00115011	-0.00141323	-0.0033471	-0.00658802		838	-0.00243405	-0.00290929	-0.00519676	-0.00724824
739	-0.00116336	-0.00142964	-0.0033664	-0.00661652		839	-0.00244638	-0.00292386	-0.00520769	-0.0072388
740	-0.00117568	-0.00144565	-0.00338663	-0.00664366		840	-0.0024601	-0.00293907	-0.00521745	-0.00722887
741	-0.0011887	-0.00146198	-0.00340825	-0.00667047		841	-0.00247126	-0.00295276	-0.00522861	-0.00721887
742	-0.00119987	-0.00147799	-0.00342685	-0.00669584		842	-0.00248474	-0.00296757	-0.00523768	-0.0072087
743	-0.00121172	-0.00149312	-0.00344731	-0.00672114		843	-0.0024973	-0.00298133	-0.00524837	-0.00719701
744	-0.00122474	-0.00150936	-0.00346638	-0.00674419		844	-0.00251032	-0.00299526	-0.00525721	-0.00718517
745	-0.00123637	-0.00152505	-0.00348754	-0.00676741		845	-0.00252381	-0.00300839	-0.00526698	-0.00717308
746	-0.00124892	-0.00154138	-0.00350661	-0.00678934		846	-0.00253682	-0.00302144	-0.00527628	-0.00716107
747	-0.00126032	-0.00155731	-0.00352986	-0.00681095		847	-0.00255008	-0.00303448	-0.00528488	-0.00714867
748	-0.00127287	-0.0015734	-0.00354916	-0.00683088		848	-0.00256147	-0.00304681	-0.00529395	-0.0071361
749	-0.0012838	-0.00158941	-0.00357032	-0.00685025		849	-0.00257496	-0.0030597	-0.00530139	-0.00712353
750	-0.00129706	-0.00160694	-0.00358868	-0.00686906		850	-0.00258682	-0.00307138	-0.00531046	-0.00711048
751	-0.00130868	-0.00162295	-0.00361031	-0.00688715		851	-0.00260054	-0.00308491	-0.00531767	-0.0070968
752	-0.00132077	-0.00164	-0.00362937	-0.00690389		852	-0.00261332	-0.00309668	-0.0053272	-0.00708287
753	-0.00133193	-0.00165593	-0.0036503	-0.00692086		853	-0.00262634	-0.00310925	-0.00533464	-0.0070695
754	-0.00134379	-0.00167218	-0.00367076	-0.0069367		854	-0.00263774	-0.00312061	-0.00534533	-0.00705725
755	-0.00135519	-0.00168915	-0.00369099	-0.00695239		855	-0.00265006	-0.00313286	-0.00535231	-0.00704404
756	-0.00136704	-0.001705	-0.00371122	-0.0069672		856	-0.00266122	-0.00314383	-0.00536208	-0.00703116
757	-0.00137867	-0.00172125	-0.00373029	-0.00698169		857	-0.00267354	-0.00315567	-0.00537138	-0.00701747
758	-0.00139029	-0.00173654	-0.00374982	-0.00699562		858	-0.00268424	-0.00316632	-0.00538161	-0.00700474
759	-0.00140122	-0.00175231	-0.00376935	-0.00700891		859	-0.00269749	-0.00317657	-0.00539044	-0.00699218
760	-0.00141262	-0.00176703	-0.00379051	-0.00702179		860	-0.00270749	-0.00318633	-0.00540044	-0.00697985
761	-0.00142285	-0.00178192	-0.00380864	-0.00703468		861	-0.00271795	-0.0031961	-0.00540997	-0.00696832
762	-0.00143447	-0.00179553	-0.0038298	-0.00704709		862	-0.00272679	-0.00320554	-0.00541904	-0.00695664
763	-0.00144587	-0.00181042	-0.00384794	-0.00705861		863	-0.00273749	-0.00321467	-0.00543043	-0.00694519
764	-0.00145703	-0.00182339	-0.0038691	-0.00707078		864	-0.00274702	-0.00322355	-0.00543881	-0.0069331
765	-0.00146795	-0.00183675	-0.0038884	-0.00708239		865	-0.00275655	-0.00323084	-0.00544927	-0.00692277
766	-0.00147772	-0.00184892	-0.00390862	-0.00709351		866	-0.00276609	-0.00323972	-0.00545787	-0.00691165
767	-0.00148981	-0.00186149	-0.00392909	-0.00710456		867	-0.00277422	-0.00324709	-0.0054681	-0.00690229
768	-0.00149981	-0.00187285	-0.00395001	-0.00711609		868	-0.00278236	-0.00325493	-0.00547601	-0.00689084
769	-0.00151097	-0.0018847	-0.00397071	-0.00712769		869	-0.0027891	-0.00326125	-0.00548577	-0.00688163
770	-0.0015212	-0.00189607	-0.00399094	-0.00713882		870	-0.00279771	-0.00326862	-0.00549414	-0.00687059
771	-0.00153166	-0.00190743	-0.00401302	-0.00715019		871	-0.00280468	-0.0032747	-0.00550275	-0.0068617
772	-0.0015412	-0.00191904	-0.00403465	-0.00716123		872	-0.00281329	-0.00328191	-0.00551042	-0.00685226
773	-0.00155073	-0.00192833	-0.00405604	-0.00717244		873	-0.00281863	-0.00328751	-0.00551879	-0.00684305
774	-0.00156096	-0.00193905	-0.0040779	-0.00718285		874	-0.00282607	-0.00329375	-0.005526	-0.00683424
775	-0.00156933	-0.00194898	-0.00409952	-0.00719437		875	-0.00283119	-0.0032992	-0.0055346	-0.00682496
776	-0.0015791	-0.00195938	-0.00412021	-0.00720454		876	-0.00283724	-0.00330488	-0.00554274	-0.00681583
777	-0.0015877	-0.00196867	-0.00414277	-0.00721414		877	-0.00284281	-0.00331016	-0.00555088	-0.00680711
778	-0.0015977	-0.00197868	-0.00416369	-0.00722351		878	-0.00284886	-0.00331561	-0.00555785	-0.00679887
779	-0.00160607	-0.00198652	-0.00418485	-0.00723303		879	-0.0028556	-0.00332097	-0.0055639	-0.00679062
780	-0.00161514	-0.00199597	-0.00420578	-0.00724136		880	-0.00286072	-0.00332521	-0.00557134	-0.00678237
781	-0.00162281	-0.00200381	-0.0042267	-0.00725009		881	-0.0028656	-0.00333081	-0.00557669	-0.00677373
782	-0.00163211	-0.00201342	-0.00424856	-0.00725849		882	-0.00287048	-0.00333498	-0.00558413	-0.00676581
783	-0.00164164	-0.0020219	-0.00427019	-0.00726698		883	-0.00287653	-0.00334042	-0.00558924	-0.0067574
784	-0.00165094	-0.00203078	-0.00429065	-0.00727466		884	-0.00288211	-0.0033449	-0.00559529	-0.00674947
785	-0.00166024	-0.00203967	-0.00430971	-0.0072825		885	-0.00288839	-0.00335035	-0.00559831	-0.00674099
786	-0.00166908	-0.00204776	-0.00432971	-0.00729003		886	-0.0028935	-0.00335531	-0.00560366	-0.00673323
787	-0.00167861	-0.00205744	-0.00434924	-0.00729707		887	-0.00290001	-0.00336003	-0.00560831	-0.00672554
788	-0.00168815	-0.00206665	-0.00436947	-0.00730492		888	-0.00290443	-0.00336435	-0.00561389	-0.00671786
789	-0.00169931	-0.00207721	-0.00438877	-0.00731148		889	-0.00291048	-0.00337052	-0.0056197	-0.00670961
790	-0.00170954	-0.00208714	-0.00440969	-0.0073186		890	-0.00291699	-0.00337604	-0.00562435	-0.00670217
791	-0.00172163	-0.00209754	-0.00442806	-0.00732477		891	-0.00292443	-0.00338156	-0.00562947	-0.00669528
792	-0.00173232	-0.00210771	-0.00444969	-0.00733149		892	-0.00293117	-0.00338749	-0.00563296	-0.00668752
793	-0.00174581	-0.002119	-0.00446759	-0.00733701		893	-0.00293791	-0.00339341	-0.00563784	-0.00668088
794	-0.00175767	-0.0021306	-0.00448805	-0.00734294		894	-0.00294535	-0.00340069	-0.00564295	-0.00667367
795	-0.00177092	-0.00214325	-0.00450689	-0.00734838		895	-0.00295187	-0.00340622	-0.0056497	-0.00666727
796	-0.00178441	-0.00215566	-0.00452758	-0.00735447		896	-0.00296023	-0.00341422	-0.00565458	-0.00666006
797	-0.00179975	-0.00216919	-0.00454758	-0.00735975		897	-0.00296744	-0.00342063	-0.00565993	-0.00665374
798	-0.0018144	-0.00218311	-0.00456711	-0.00736415		898	-0.00297651	-0.00342895	-0.00566458	-0.00664678
799	-0.00183044	-0.00219696	-0.0045864	-0.00736879		899	-0.00298442	-0.00343551	-0.00567062	-0.00664085
800	-0.00184579	-0.00221225	-0.0046057	-0.00737256		900	-0.00299232	-0.00344448	-0.00567574	-0.00663373
801	-0.00186184	-0.00222738	-0.00462431	-0.00737688		901	-0.00300069	-0.003452	-0.00568295	-0.00662741
802	-0.00187834	-0.00224499	-0.00464407	-0.00737992		902	-0.0030093	-0.00346017	-0.00568806	-0.00662132
803	-0.00189532	-0.00226148	-0.00466383	-0.0073832		903	-0.00301743	-0.00346833	-0.00569434	-0.00661572
804	-0.00191252	-0.00228013	-0.00468197	-0.00738544		904	-0.00302674	-0.00347658	-0.00570015	-0.00661028
805	-0.00192973	-0.00229766	-0.00470127	-0.0073876		905	-0.0030358	-0.0034845	-0.00570573	-0.00660427
806	-0.00194787	-0.00231663	-0.00471871	-0.00738928		906	-0.00304487	-0.00349227	-0.00571131	-0.00659899
807	-0.00196437	-0.00233512	-0.00473824	-0.00739072		907	-0.0030544	-0.00349995	-0.00571666	-0.00659443
808	-0.00198251	-0.00235569	-0.00475498	-0.00739073		908	-0.00306324	-0.00350716	-0.00572201	-0.0065893
809	-0.00199925	-0.0023749	-0.00477405	-0.00739089		909	-0.00307301	-0.00351524	-0.00572689	-0.00658458
810	-0.00201716	-0.00239564	-0.00479032	-0.00739056		910	-0.00308091	-0.00352204	-0.00573294	-0.00658074
811	-0.00203529	-0.00241565	-0.00480915	-0.00739016		911	-0.00309068	-0.00352973	-0.00573573	-0.00657578
812	-0.00205366	-0.00243614	-0.0048245	-0.00738808		912	-0.00309858	-0.00353693	-0.00574084	-0.00657169
813	-0.00207017	-0.00245575	-0.0048431	-0.00738664		913	-0.00310811	-0.00354406	-0.00574386	-0.00656745
814	-0.00208761	-0.00247616	-0.00485914	-0.0073844		914	-0.00311695	-0.00355006	-0.00574921	-0.00656393
815	-0.00210365	-0.00249697	-0.00487635	-0.0073824		915	-0.00312532	-0.00355742	-0.00575317	-0.00656025
816	-0.00212039	-0.00251682	-0.00489263	-0.0073796		916	-0.00313299	-0.00356343	-0.00575828	-0.00655745
817	-0.00213806	-0.00253668	-0.00490797	-0.00737656		917	-0.00314183	-0.00357095	-0.00576084	-0.0065544
818	-0.00215411	-0.00255613	-0.00492402	-0.00737383		918	-0.00314857	-0.00357672	-0.00576433	-0.00655144
819	-0.00217038	-0.00257614	-0.0049396	-0.00736927		919	-0.00315717	-0.00358376	-0.00576781	-0.00654928
820	-0.00218456	-0.00259527	-0.00495657	-0.00736607		920	-0.00316462	-0.0035896	-0.00576898	-0.00654736
821	-0.00220084	-0.00261568	-0.00497006	-0.00736167		921	-0.00317252	-0.00359593	-0.00577316	-0.00654536
822	-0.00221479	-0.00263409	-0.00498587	-0.00735775		922	-0.00318019	-0.00360281	-0.00577479	-0.00654408
823	-0.0022306	-0.00265402	-0.00500005	-0.00735254		923	-0.00318647	-0.00360857	-0.00577804	-0.0065432
824	-0.00224479	-0.0026722	-0.00501586	-0.00734718		924	-0.00319322	-0.00361506	-0.00578014	-0.00654136
825	-0.0022606	-0.00269109	-0.00503074	-0.00734166		925	-0.00319949	-0.00362026	-0.00578269	-0.00654096
826	-0.00227315	-0.00270878	-0.00504539	-0.00733629		926	-0.00320647	-0.0036269	-0.0057827	-0.00654008
827	-0.0022878	-0.00272775	-0.00505888	-0.00733021		927	-0.00321228	-0.00363283	-0.00578548	-0.00653927
828	-0.00230036	-0.00274504	-0.00507399	-0.00732445		928	-0.00321902	-0.00363899	-0.00578618	-0.00653807
829	-0.00231477	-0.00276361	-0.00508771	-0.00731796		929	-0.00322437	-0.00364436	-0.00578781	-0.00653743
830	-0.00232756	-0.0027805	-0.00510073	-0.00731108		930	-0.00323042	-0.00365076	-0.00578781	-0.00653655
831	-0.00234128	-0.00279707	-0.00511445	-0.00730404		931	-0.0032346	-0.00365636	-0.0057906	-0.00653551
832	-0.00235453	-0.00281452	-0.00512723	-0.00729723		932	-0.00323995	-0.00366228	-0.00579013	-0.00653479
833	-0.00236732	-0.00283029	-0.00514072	-0.00729027		933	-0.0032446	-0.00366789	-0.005792	-0.00653391
834	-0.00238058	-0.00284733	-0.00515142	-0.00728274		934	-0.00324972	-0.00367293	-0.00579246	-0.00653287
835	-0.00239383	-0.00286254	-0.0051649	-0.00727522		935	-0.00325506	-0.00367862	-0.00579316	-0.00653239
836	-0.00240732	-0.00287895	-0.00517537	-0.00726665		936	-0.00326064	-0.00368358	-0.00579316	-0.00653119
837	-0.00241964	-0.00289352	-0.00518676	-0.00725761		937	-0.00326529	-0.00368902	-0.00579362	-0.00652975
838	-0.00243405	-0.00290929	-0.00519676	-0.00724824		938	-0.00327134	-0.00369398	-0.00579362	-0.00652927
839	-0.00244638	-0.00292386	-0.00520769	-0.0072388		939	-0.00327622	-0.00369959	-0.00579316	-0.00652751
840	-0.0024601	-0.00293907	-0.00521745	-0.00722887		940	-0.00328227	-0.00370415	-0.00579316	-0.00652623
841	-0.00247126	-0.00295276	-0.00522861	-0.00721887		941	-0.00328855	-0.00370903	-0.00579153	-0.00652423
842	-0.00248474	-0.00296757	-0.00523768	-0.0072087		942	-0.0032932	-0.00371407	-0.00579176	-0.00652311
843	-0.0024973	-0.00298133	-0.00524837	-0.00719701		943	-0.00329901	-0.00371864	-0.00578944	-0.00652094
844	-0.00251032	-0.00299526	-0.00525721	-0.00718517		944	-0.0033032	-0.00372312	-0.00579107	-0.0065199
845	-0.00252381	-0.00300839	-0.00526698	-0.00717308		945	-0.00330924	-0.00372768	-0.00578897	-0.00651814
846	-0.00253682	-0.00302144	-0.00527628	-0.00716107		946	-0.00331389	-0.00373136	-0.00578944	-0.0065167
847	-0.00255008	-0.00303448	-0.00528488	-0.00714867		947	-0.00332017	-0.00373617	-0.00578688	-0.00651486
848	-0.00256147	-0.00304681	-0.00529395	-0.0071361		948	-0.00332412	-0.00373993	-0.00578665	-0.0065131
849	-0.00257496	-0.0030597	-0.00530139	-0.00712353		949	-0.003329	-0.00374457	-0.00578502	-0.00651174
850	-0.00258682	-0.00307138	-0.00531046	-0.00711048		950	-0.00333296	-0.00374842	-0.00578432	-0.00651054
851	-0.00260054	-0.00308491	-0.00531767	-0.0070968		951	-0.00333737	-0.0037521	-0.00578293	-0.00650998
852	-0.00261332	-0.00309668	-0.0053272	-0.00708287		952	-0.00334133	-0.0037557	-0.0057813	-0.00650958
853	-0.00262634	-0.00310925	-0.00533464	-0.0070695		953	-0.00334551	-0.00375842	-0.0057806	-0.00650902
854	-0.00263774	-0.00312061	-0.00534533	-0.00705725		954	-0.00334946	-0.0037621	-0.00577781	-0.00650822
855	-0.00265006	-0.00313286	-0.00535231	-0.00704404		955	-0.00335272	-0.0037645	-0.00577712	-0.0065083
856	-0.00266122	-0.00314383	-0.00536208	-0.00703116		956	-0.0033569	-0.00376746	-0.00577549	-0.00650774
857	-0.00267354	-0.00315567	-0.00537138	-0.00701747		957	-0.00335993	-0.00376947	-0.00577525	-0.0065087
858	-0.00268424	-0.00316632	-0.00538161	-0.00700474		958	-0.00336365	-0.00377243	-0.005772	-0.0065087
859	-0.00269749	-0.00317657	-0.00539044	-0.00699218		959	-0.00336621	-0.00377323	-0.00577177	-0.00650942
860	-0.00270749	-0.00318633	-0.00540044	-0.00697985		960	-0.00336969	-0.00377603	-0.00576828	-0.00650982
861	-0.00271795	-0.0031961	-0.00540997	-0.00696832		961	-0.00337155	-0.00377811	-0.00576851	-0.00651046
862	-0.00272679	-0.00320554	-0.00541904	-0.00695664		962	-0.00337458	-0.00378099	-0.00576572	-0.0065111
863	-0.00273749	-0.00321467	-0.00543043	-0.00694519		963	-0.00337574	-0.00378283	-0.00576526	-0.00651158
864	-0.00274702	-0.00322355	-0.00543881	-0.0069331		964	-0.00337853	-0.00378572	-0.0057634	-0.00651302
865	-0.00275655	-0.00323084	-0.00544927	-0.00692277		965	-0.00337923	-0.00378796	-0.005762	-0.0065131
866	-0.00276609	-0.00323972	-0.00545787	-0.00691165		966	-0.00338225	-0.00379092	-0.00575968	-0.00651454
867	-0.00277422	-0.00324709	-0.0054681	-0.00690229		967	-0.00338411	-0.00379372	-0.00575758	-0.0065151
868	-0.00278236	-0.00325493	-0.00547601	-0.00689084		968	-0.00338574	-0.00379652	-0.00575526	-0.00651662
869	-0.0027891	-0.00326125	-0.00548577	-0.00688163		969	-0.00338876	-0.0037998	-0.005752	-0.00651702
870	-0.00279771	-0.00326862	-0.00549414	-0.00687059		970	-0.00339085	-0.00380245	-0.00574944	-0.00651847
871	-0.00280468	-0.0032747	-0.00550275	-0.0068617		971	-0.00339295	-0.00380605	-0.00574619	-0.00651862
872	-0.00281329	-0.00328191	-0.00551042	-0.00685226		972	-0.00339388	-0.00380861	-0.0057441	-0.00652054
873	-0.00281863	-0.00328751	-0.00551879	-0.00684305		973	-0.0033976	-0.00381253	-0.00573852	-0.00652102
874	-0.00282607	-0.00329375	-0.005526	-0.00683424		974	-0.00339922	-0.00381509	-0.00573596	-0.00652174
875	-0.00283119	-0.0032992	-0.0055346	-0.00682496		975	-0.00340225	-0.00381926	-0.00573061	-0.00652311
876	-0.00283724	-0.00330488	-0.00554274	-0.00681583		976	-0.00340457	-0.00382246	-0.00572712	-0.00652423
877	-0.00284281	-0.00331016	-0.00555088	-0.00680711		977	-0.0034069	-0.00382606	-0.0057234	-0.00652503
878	-0.00284886	-0.00331561	-0.00555785	-0.00679887		978	-0.00340945	-0.0038291	-0.00571992	-0.00652575
879	-0.0028556	-0.00332097	-0.0055639	-0.00679062		979	-0.00341178	-0.00383286	-0.00571573	-0.00652719
880	-0.00286072	-0.00332521	-0.00557134	-0.00678237		980	-0.00341434	-0.00383599	-0.00571201	-0.00652735
881	-0.0028656	-0.00333081	-0.00557669	-0.00677373		981	-0.00341759	-0.00383895	-0.00570876	-0.00652895
882	-0.00287048	-0.00333498	-0.00558413	-0.00676581		982	-0.00341945	-0.00384199	-0.0057048	-0.00652943
883	-0.00287653	-0.00334042	-0.00558924	-0.0067574		983	-0.00342247	-0.00384503	-0.00570155	-0.00653127
884	-0.00288211	-0.0033449	-0.00559529	-0.00674947		984	-0.00342457	-0.00384807	-0.00569899	-0.00653239
885	-0.00288839	-0.00335035	-0.00559831	-0.00674099		985	-0.00342782	-0.00385007	-0.0056969	-0.00653359
886	-0.0028935	-0.00335531	-0.00560366	-0.00673323		986	-0.00343108	-0.00385295	-0.00569201	-0.00653447
887	-0.00290001	-0.00336003	-0.00560831	-0.00672554		987	-0.00343294	-0.00385424	-0.00569039	-0.00653567
888	-0.00290443	-0.00336435	-0.00561389	-0.00671786		988	-0.00343619	-0.0038564	-0.00568573	-0.00653631
889	-0.00291048	-0.00337052	-0.0056197	-0.00670961		989	-0.00343782	-0.00385744	-0.00568318	-0.00653776
890	-0.00291699	-0.00337604	-0.00562435	-0.00670217		990	-0.00344084	-0.0038596	-0.0056783	-0.00653832
891	-0.00292443	-0.00338156	-0.00562947	-0.00669528		991	-0.0034427	-0.0038608	-0.00567643	-0.00653904
892	-0.00293117	-0.00338749	-0.00563296	-0.00668752		992	-0.00344526	-0.00386272	-0.00567225	-0.00653992
893	-0.00293791	-0.00339341	-0.00563784	-0.00668088		993	-0.00344596	-0.00386328	-0.00566876	-0.00654048
894	-0.00294535	-0.00340069	-0.00564295	-0.00667367		994	-0.00344852	-0.00386488	-0.00566411	-0.00654039
895	-0.00295187	-0.00340622	-0.0056497	-0.00666727		995	-0.00344875	-0.0038656	-0.00566016	-0.0065408
896	-0.00296023	-0.00341422	-0.00565458	-0.00666006		996	-0.00345107	-0.00386632	-0.00565551	-0.0065416
897	-0.00296744	-0.00342063	-0.00565993	-0.00665374		997	-0.0034527	-0.00386752	-0.00565156	-0.00654264
898	-0.00297651	-0.00342895	-0.00566458	-0.00664678		998	-0.00345503	-0.00386824	-0.00564737	-0.00654272
899	-0.00298442	-0.00343551	-0.00567062	-0.00664085		999	-0.00345689	-0.00386872	-0.00564202	-0.0065428
900	-0.00299232	-0.00344448	-0.00567574	-0.00663373		1000	-0.00345875	-0.00386888	-0.00563807	-0.00654304
901	-0.00300069	-0.003452	-0.00568295	-0.00662741		1001	-0.00345944	-0.00386944	-0.00563295	-0.00654272
902	-0.0030093	-0.00346017	-0.00568806	-0.00662132		1002	-0.00345968	-0.00386864	-0.00562947	-0.00654312
903	-0.00301743	-0.00346833	-0.00569434	-0.00661572		1003	-0.00346177	-0.00386912	-0.00562389	-0.00654264
904	-0.00302674	-0.00347658	-0.00570015	-0.00661028		1004	-0.00346154	-0.0038684	-0.00561877	-0.00654296
905	-0.0030358	-0.0034845	-0.00570573	-0.00660427		1005	-0.00346479	-0.0038688	-0.00561319	-0.00654224
906	-0.00304487	-0.00349227	-0.00571131	-0.00659899		1006	-0.00346363	-0.003868	-0.00560854	-0.00654232
907	-0.0030544	-0.00349995	-0.00571666	-0.00659443		1007	-0.00346503	-0.00386744	-0.00560366	-0.00654064
908	-0.00306324	-0.00350716	-0.00572201	-0.0065893		1008	-0.00346479	-0.00386736	-0.00559878	-0.00653999
909	-0.00307301	-0.00351524	-0.00572689	-0.00658458		1009	-0.00346596	-0.00386632	-0.0055925	-0.00653927
910	-0.00308091	-0.00352204	-0.00573294	-0.00658074		1010	-0.00346549	-0.00386584	-0.00558761	-0.00653872
911	-0.00309068	-0.00352973	-0.00573573	-0.00657578		1011	-0.00346688	-0.00386592	-0.00558203	-0.00653847
912	-0.00309858	-0.00353693	-0.00574084	-0.00657169		1012	-0.00346735	-0.00386528	-0.00557576	-0.00653719
913	-0.00310811	-0.00354406	-0.00574386	-0.00656745		1013	-0.00346758	-0.00386504	-0.00557111	-0.00653655
914	-0.00311695	-0.00355006	-0.00574921	-0.00656393		1014	-0.00346758	-0.00386472	-0.00556529	-0.00653487
915	-0.00312532	-0.00355742	-0.00575317	-0.00656025		1015	-0.00346828	-0.003864	-0.00556041	-0.00653439
916	-0.00313299	-0.00356343	-0.00575828	-0.00655745		1016	-0.00346875	-0.003864	-0.00555413	-0.00653375
917	-0.00314183	-0.00357095	-0.00576084	-0.0065544		1017	-0.00346944	-0.00386328	-0.00554948	-0.00653343
918	-0.00314857	-0.00357672	-0.00576433	-0.00655144		1018	-0.00346968	-0.00386312	-0.00554227	-0.00653303
919	-0.00315717	-0.00358376	-0.00576781	-0.00654928		1019	-0.00346944	-0.00386232	-0.00553855	-0.00653263
920	-0.00316462	-0.0035896	-0.00576898	-0.00654736		1020	-0.00346991	-0.00386192	-0.00553181	-0.00653199
921	-0.00317252	-0.00359593	-0.00577316	-0.00654536		1021	-0.00346921	-0.00386128	-0.00552902	-0.00653247
922	-0.00318019	-0.00360281	-0.00577479	-0.00654408		1022	-0.00346851	-0.00386152	-0.00552251	-0.00653183
923	-0.00318647	-0.00360857	-0.00577804	-0.0065432		1023	-0.00346805	-0.0038604	-0.00551786	-0.00653223
924	-0.00319322	-0.00361506	-0.00578014	-0.00654136		1024	-0.00346735	-0.00386048	-0.00551205	-0.00653191
925	-0.00319949	-0.00362026	-0.00578269	-0.00654096		1025	-0.00346712	-0.00385936	-0.00550763	-0.00653215
926	-0.00320647	-0.0036269	-0.0057827	-0.00654008		1026	-0.00346642	-0.00385944	-0.00550298	-0.00653199
927	-0.00321228	-0.00363283	-0.00578548	-0.00653927		1027	-0.00346619	-0.00385912	-0.0054974	-0.00653239
928	-0.00321902	-0.00363899	-0.00578618	-0.00653807		1028	-0.00346503	-0.0038584	-0.00549345	-0.00653263
929	-0.00322437	-0.00364436	-0.00578781	-0.00653743		1029	-0.00346409	-0.00385768	-0.00548786	-0.00653311
930	-0.00323042	-0.00365076	-0.00578781	-0.00653655		1030	-0.00346293	-0.0038568	-0.00548275	-0.00653383
931	-0.0032346	-0.00365636	-0.0057906	-0.00653551		1031	-0.00346247	-0.00385632	-0.00547647	-0.00653327
932	-0.00323995	-0.00366228	-0.00579013	-0.00653479		1032	-0.0034613	-0.00385504	-0.00547112	-0.00653423
933	-0.0032446	-0.00366789	-0.005792	-0.00653391		1033	-0.00346131	-0.00385456	-0.00546485	-0.00653423
934	-0.00324972	-0.00367293	-0.00579246	-0.00653287		1034	-0.00346014	-0.00385287	-0.00545996	-0.00653503
935	-0.00325506	-0.00367862	-0.00579316	-0.00653239		1035	-0.00345968	-0.00385215	-0.00545322	-0.00653527
936	-0.00326064	-0.00368358	-0.00579316	-0.00653119		1036	-0.00345875	-0.00385007	-0.0054488	-0.00653511
937	-0.00326529	-0.00368902	-0.00579362	-0.00652975		1037	-0.00345875	-0.00384919	-0.00544159	-0.00653535
938	-0.00327134	-0.00369398	-0.00579362	-0.00652927		1038	-0.00345805	-0.00384735	-0.00543601	-0.00653527
939	-0.00327622	-0.00369959	-0.00579316	-0.00652751		1039	-0.00345758	-0.00384655	-0.00542927	-0.00653511
940	-0.00328227	-0.00370415	-0.00579316	-0.00652623		1040	-0.00345642	-0.00384399	-0.00542416	-0.00653535
941	-0.00328855	-0.00370903	-0.00579153	-0.00652423		1041	-0.00345619	-0.00384207	-0.00541695	-0.00653583
942	-0.0032932	-0.00371407	-0.00579176	-0.00652311		1042	-0.00345503	-0.00383999	-0.00541114	-0.00653495
943	-0.00329901	-0.00371864	-0.00578944	-0.00652094		1043	-0.00345549	-0.00383775	-0.00540416	-0.00653495
944	-0.0033032	-0.00372312	-0.00579107	-0.0065199		1044	-0.0034541	-0.00383518	-0.00539718	-0.00653407
945	-0.00330924	-0.00372768	-0.00578897	-0.00651814		1045	-0.00345317	-0.00383222	-0.00539207	-0.00653375
946	-0.00331389	-0.00373136	-0.00578944	-0.0065167		1046	-0.00345224	-0.00382966	-0.00538486	-0.00653335
947	-0.00332017	-0.00373617	-0.00578688	-0.00651486		1047	-0.00345154	-0.00382534	-0.00538021	-0.00653287
948	-0.00332412	-0.00373993	-0.00578665	-0.0065131		1048	-0.00345154	-0.0038219	-0.00537277	-0.00653207
949	-0.003329	-0.00374457	-0.00578502	-0.00651174		1049	-0.00344991	-0.00381741	-0.00536905	-0.00653087
950	-0.00333296	-0.00374842	-0.00578432	-0.00651054		1050	-0.00344875	-0.00381365	-0.00536138	-0.00652983
951	-0.00333737	-0.0037521	-0.00578293	-0.00650998		1051	-0.00344689	-0.00380813	-0.00535789	-0.00652903
952	-0.00334133	-0.0037557	-0.0057813	-0.00650958		1052	-0.00344573	-0.00380429	-0.00535091	-0.00652743
953	-0.00334551	-0.00375842	-0.0057806	-0.00650902		1053	-0.0034441	-0.00379884	-0.00534696	-0.00652711
954	-0.00334946	-0.0037621	-0.00577781	-0.00650822		1054	-0.00344433	-0.00379444	-0.00533975	-0.00652623
955	-0.00335272	-0.0037645	-0.00577712	-0.0065083		1055	-0.0034427	-0.00378892	-0.00533487	-0.00652511
956	-0.0033569	-0.00376746	-0.00577549	-0.00650774		1056	-0.00344131	-0.00378395	-0.0053279	-0.00652383
957	-0.00335993	-0.00376947	-0.00577525	-0.0065087		1057	-0.00343852	-0.00377963	-0.00532394	-0.00652215
958	-0.00336365	-0.00377243	-0.005772	-0.0065087		1058	-0.00343736	-0.00377491	-0.0053179	-0.00652102
959	-0.00336621	-0.00377323	-0.00577177	-0.00650942		1059	-0.0034348	-0.00377051	-0.00531162	-0.0065199
960	-0.00336969	-0.00377603	-0.00576828	-0.00650982		1060	-0.0034327	-0.00376691	-0.00530604	-0.00651838
961	-0.00337155	-0.00377811	-0.00576851	-0.00651046		1061	-0.00343131	-0.00376427	-0.00529953	-0.00651598
962	-0.00337458	-0.00378099	-0.00576572	-0.0065111		1062	-0.00342945	-0.00376058	-0.00529488	-0.0065147
963	-0.00337574	-0.00378283	-0.00576526	-0.00651158		1063	-0.00342689	-0.00375818	-0.0052886	-0.00651214
964	-0.00337853	-0.00378572	-0.0057634	-0.00651302		1064	-0.0034248	-0.00375546	-0.00528418	-0.00651078
965	-0.00337923	-0.00378796	-0.005762	-0.0065131		1065	-0.00342364	-0.00375466	-0.00527697	-0.00650822
966	-0.00338225	-0.00379092	-0.00575968	-0.00651454		1066	-0.00342108	-0.0037529	-0.00527209	-0.00650653
967	-0.00338411	-0.00379372	-0.00575758	-0.0065151		1067	-0.00341992	-0.0037533	-0.00526535	-0.00650461
968	-0.00338574	-0.00379652	-0.00575526	-0.00651662		1068	-0.00341759	-0.0037521	-0.00526093	-0.00650261
969	-0.00338876	-0.0037998	-0.005752	-0.00651702		1069	-0.00341666	-0.0037529	-0.00525558	-0.00650013
970	-0.00339085	-0.00380245	-0.00574944	-0.00651847		1070	-0.0034141	-0.0037525	-0.00525024	-0.00649789
971	-0.00339295	-0.00380605	-0.00574619	-0.00651862		1071	-0.00341248	-0.00375426	-0.00524373	-0.00649613
972	-0.00339388	-0.00380861	-0.0057441	-0.00652054		1072	-0.00341062	-0.00375562	-0.00523675	-0.00649405
973	-0.0033976	-0.00381253	-0.00573852	-0.00652102		1073	-0.00340922	-0.00375738	-0.00523164	-0.00649205
974	-0.00339922	-0.00381509	-0.00573596	-0.00652174		1074	-0.00340713	-0.00376002	-0.00522559	-0.00648949
975	-0.00340225	-0.00381926	-0.00573061	-0.00652311		1075	-0.00340573	-0.00376234	-0.00521978	-0.00648709
976	-0.00340457	-0.00382246	-0.00572712	-0.00652423		1076	-0.00340457	-0.00376546	-0.00521303	-0.00648436
977	-0.0034069	-0.00382606	-0.0057234	-0.00652503		1077	-0.00340364	-0.00376875	-0.00520699	-0.00648188
978	-0.00340945	-0.0038291	-0.00571992	-0.00652575		1078	-0.00340364	-0.00377251	-0.00519838	-0.00647988
979	-0.00341178	-0.00383286	-0.00571573	-0.00652719		1079	-0.00340201	-0.00377635	-0.00519304	-0.00647748
980	-0.00341434	-0.00383599	-0.00571201	-0.00652735		1080	-0.00340201	-0.00378043	-0.00518467	-0.00647516
981	-0.00341759	-0.00383895	-0.00570876	-0.00652895		1081	-0.00340062	-0.00378444	-0.00517955	-0.00647268
982	-0.00341945	-0.00384199	-0.0057048	-0.00652943		1082	-0.00339992	-0.00378932	-0.00517188	-0.00646915
983	-0.00342247	-0.00384503	-0.00570155	-0.00653127		1083	-0.00339922	-0.00379356	-0.00516746	-0.00646755
984	-0.00342457	-0.00384807	-0.00569899	-0.00653239		1084	-0.00339946	-0.00379836	-0.00516002	-0.00646483
985	-0.00342782	-0.00385007	-0.0056969	-0.00653359		1085	-0.00339852	-0.00380204	-0.00515351	-0.00646275
986	-0.00343108	-0.00385295	-0.00569201	-0.00653447		1086	-0.00339852	-0.00380645	-0.00514653	-0.00646035
987	-0.00343294	-0.00385424	-0.00569039	-0.00653567		1087	-0.00339736	-0.00381045	-0.00513979	-0.00645795
988	-0.00343619	-0.0038564	-0.00568573	-0.00653631		1088	-0.00339643	-0.00381485	-0.00513398	-0.00645563
989	-0.00343782	-0.00385744	-0.00568318	-0.00653776		1089	-0.00339388	-0.00381878	-0.00512723	-0.00645282
990	-0.00344084	-0.0038596	-0.0056783	-0.00653832		1090	-0.00339388	-0.00382254	-0.00512119	-0.00645082
991	-0.0034427	-0.0038608	-0.00567643	-0.00653904		1091	-0.00339341	-0.00382646	-0.00511445	-0.00644762
992	-0.00344526	-0.00386272	-0.00567225	-0.00653992		1092	-0.00339341	-0.00382918	-0.00510794	-0.0064457
993	-0.00344596	-0.00386328	-0.00566876	-0.00654048		1093	-0.00339202	-0.00383222	-0.00510026	-0.00644274
994	-0.00344852	-0.00386488	-0.00566411	-0.00654039		1094	-0.00339108	-0.00383447	-0.00509468	-0.00644058
995	-0.00344875	-0.0038656	-0.00566016	-0.0065408		1095	-0.00338992	-0.00383751	-0.00508724	-0.0064373
996	-0.00345107	-0.00386632	-0.00565551	-0.0065416		1096	-0.00338829	-0.00383879	-0.00508189	-0.00643425
997	-0.0034527	-0.00386752	-0.00565156	-0.00654264		1097	-0.00338853	-0.00384055	-0.00507469	-0.00643105
998	-0.00345503	-0.00386824	-0.00564737	-0.00654272		1098	-0.0033876	-0.00384087	-0.00506911	-0.00642809
999	-0.00345689	-0.00386872	-0.00564202	-0.0065428		1099	-0.0033876	-0.00384191	-0.0050619	-0.00642521
1000	-0.00345875	-0.00386888	-0.00563807	-0.00654304		1100	-0.00338551	-0.00384159	-0.00505609	-0.00642241
1001	-0.00345944	-0.00386944	-0.00563295	-0.00654272		1101	-0.00338457	-0.00384207	-0.00504911	-0.00641848
1002	-0.00345968	-0.00386864	-0.00562947	-0.00654312		1102	-0.00338178	-0.00384135	-0.00504376	-0.00641576
1003	-0.00346177	-0.00386912	-0.00562389	-0.00654264		1103	-0.00338155	-0.00384047	-0.00503748	-0.0064116
1004	-0.00346154	-0.0038684	-0.00561877	-0.00654296		1104	-0.00337923	-0.00383839	-0.00503097	-0.006408
1005	-0.00346479	-0.0038688	-0.00561319	-0.00654224		1105	-0.0033783	-0.00383591	-0.00502539	-0.00640528
1006	-0.00346363	-0.003868	-0.00560854	-0.00654232		1106	-0.00337597	-0.00383406	-0.00501888	-0.0064016
1007	-0.00346503	-0.00386744	-0.00560366	-0.00654064		1107	-0.00337365	-0.0038315	-0.00501307	-0.00639871
1008	-0.00346479	-0.00386736	-0.00559878	-0.00653999		1108	-0.00337109	-0.00382934	-0.0050061	-0.00639479
1009	-0.00346596	-0.00386632	-0.0055925	-0.00653927		1109	-0.00336737	-0.00382574	-0.00500191	-0.00639167
1010	-0.00346549	-0.00386584	-0.00558761	-0.00653872		1110	-0.00336597	-0.00382286	-0.00499354	-0.00638695
1011	-0.00346688	-0.00386592	-0.00558203	-0.00653847		1111	-0.00336225	-0.00381869	-0.00498889	-0.00638326
1012	-0.00346735	-0.00386528	-0.00557576	-0.00653719		1112	-0.0033597	-0.00381557	-0.00498075	-0.0063795
1013	-0.00346758	-0.00386504	-0.00557111	-0.00653655		1113	-0.00335644	-0.00381141	-0.00497587	-0.0063759
1014	-0.00346758	-0.00386472	-0.00556529	-0.00653487		1114	-0.00335342	-0.00380821	-0.00496912	-0.00637222
1015	-0.00346828	-0.003864	-0.00556041	-0.00653439		1115	-0.0033497	-0.00380405	-0.00496331	-0.00636806
1016	-0.00346875	-0.003864	-0.00555413	-0.00653375		1116	-0.00334691	-0.00380028	-0.00495657	-0.00636421
1017	-0.00346944	-0.00386328	-0.00554948	-0.00653343		1117	-0.00334249	-0.00379556	-0.00494983	-0.00636005
1018	-0.00346968	-0.00386312	-0.00554227	-0.00653303		1118	-0.00333877	-0.00379156	-0.00494308	-0.00635581
1019	-0.00346944	-0.00386232	-0.00553855	-0.00653263		1119	-0.00333435	-0.00378708	-0.00493611	-0.00635181
1020	-0.00346991	-0.00386192	-0.00553181	-0.00653199		1120	-0.00333086	-0.00378235	-0.0049289	-0.0063482
1021	-0.00346921	-0.00386128	-0.00552902	-0.00653247		1121	-0.00332621	-0.00377875	-0.00492169	-0.0063438
1022	-0.00346851	-0.00386152	-0.00552251	-0.00653183		1122	-0.00332296	-0.00377467	-0.00491518	-0.0063398
1023	-0.00346805	-0.0038604	-0.00551786	-0.00653223		1123	-0.003319	-0.00377123	-0.00490611	-0.00633532
1024	-0.00346735	-0.00386048	-0.00551205	-0.00653191		1124	-0.00331552	-0.00376667	-0.0048996	-0.00633123
1025	-0.00346712	-0.00385936	-0.00550763	-0.00653215		1125	-0.00331133	-0.00376306	-0.00489053	-0.00632675
1026	-0.00346642	-0.00385944	-0.00550298	-0.00653199		1126	-0.00330808	-0.00375842	-0.00488333	-0.00632307
1027	-0.00346619	-0.00385912	-0.0054974	-0.00653239		1127	-0.00330389	-0.00375602	-0.00487356	-0.00631915
1028	-0.00346503	-0.0038584	-0.00549345	-0.00653263		1128	-0.00329854	-0.0037513	-0.00486612	-0.00631563
1029	-0.00346409	-0.00385768	-0.00548786	-0.00653311		1129	-0.00329529	-0.00374785	-0.00485705	-0.00631139
1030	-0.00346293	-0.0038568	-0.00548275	-0.00653383		1130	-0.00329087	-0.00374337	-0.00484961	-0.00630786
1031	-0.00346247	-0.00385632	-0.00547647	-0.00653327		1131	-0.00328692	-0.00374009	-0.00484008	-0.00630402
1032	-0.0034613	-0.00385504	-0.00547112	-0.00653423		1132	-0.00328111	-0.00373657	-0.00483171	-0.00630034
1033	-0.00346131	-0.00385456	-0.00546485	-0.00653423		1133	-0.00327646	-0.00373257	-0.00482287	-0.00629729
1034	-0.00346014	-0.00385287	-0.00545996	-0.00653503		1134	-0.00327111	-0.00372928	-0.00481404	-0.00629345
1035	-0.00345968	-0.00385215	-0.00545322	-0.00653527		1135	-0.00326715	-0.00372536	-0.00480543	-0.00629057
1036	-0.00345875	-0.00385007	-0.0054488	-0.00653511		1136	-0.00326227	-0.00372248	-0.00479683	-0.00628697
1037	-0.00345875	-0.00384919	-0.00544159	-0.00653535		1137	-0.00325855	-0.00371904	-0.00478962	-0.00628361
1038	-0.00345805	-0.00384735	-0.00543601	-0.00653527		1138	-0.0032539	-0.00371608	-0.00477986	-0.00627937
1039	-0.00345758	-0.00384655	-0.00542927	-0.00653511		1139	-0.00324925	-0.00371095	-0.00477172	-0.00627616
1040	-0.00345642	-0.00384399	-0.00542416	-0.00653535		1140	-0.00324507	-0.00370783	-0.00476288	-0.00627224
1041	-0.00345619	-0.00384207	-0.00541695	-0.00653583		1141	-0.00324041	-0.00370351	-0.00475544	-0.00626864
1042	-0.00345503	-0.00383999	-0.00541114	-0.00653495		1142	-0.00323693	-0.00370015	-0.00474661	-0.0062648
1043	-0.00345549	-0.00383775	-0.00540416	-0.00653495		1143	-0.00323181	-0.00369582	-0.00474056	-0.00626095
1044	-0.0034541	-0.00383518	-0.00539718	-0.00653407		1144	-0.00322972	-0.0036923	-0.00473173	-0.00625703
1045	-0.00345317	-0.00383222	-0.00539207	-0.00653375		1145	-0.00322391	-0.00368734	-0.00472475	-0.00625327
1046	-0.00345224	-0.00382966	-0.00538486	-0.00653335		1146	-0.00322112	-0.00368318	-0.00471545	-0.00624887
1047	-0.00345154	-0.00382534	-0.00538021	-0.00653287		1147	-0.00321623	-0.0036787	-0.00470917	-0.00624526
1048	-0.00345154	-0.0038219	-0.00537277	-0.00653207		1148	-0.00321228	-0.00367429	-0.00470173	-0.00624166
1049	-0.00344991	-0.00381741	-0.00536905	-0.00653087		1149	-0.0032074	-0.00367021	-0.00469476	-0.00623726
1050	-0.00344875	-0.00381365	-0.00536138	-0.00652983		1150	-0.00320345	-0.00366549	-0.00468802	-0.00623406
1051	-0.00344689	-0.00380813	-0.00535789	-0.00652903		1151	-0.00319973	-0.00366092	-0.00467895	-0.0062299
1052	-0.00344573	-0.00380429	-0.00535091	-0.00652743		1152	-0.00319577	-0.00365644	-0.0046722	-0.00622645
1053	-0.0034441	-0.00379884	-0.00534696	-0.00652711		1153	-0.00319205	-0.00365196	-0.00466407	-0.00622229
1054	-0.00344433	-0.00379444	-0.00533975	-0.00652623		1154	-0.00318694	-0.00364652	-0.00465686	-0.00621821
1055	-0.0034427	-0.00378892	-0.00533487	-0.00652511		1155	-0.00318252	-0.00364347	-0.00464825	-0.00621397
1056	-0.00344131	-0.00378395	-0.0053279	-0.00652383		1156	-0.00317787	-0.00363787	-0.00464151	-0.00621068
1057	-0.00343852	-0.00377963	-0.00532394	-0.00652215		1157	-0.00317508	-0.00363451	-0.00463244	-0.00620612
1058	-0.00343736	-0.00377491	-0.0053179	-0.00652102		1158	-0.00317043	-0.00362907	-0.00462547	-0.00620148
1059	-0.0034348	-0.00377051	-0.00531162	-0.0065199		1159	-0.00316694	-0.00362522	-0.0046164	-0.00619732
1060	-0.0034327	-0.00376691	-0.00530604	-0.00651838		1160	-0.00316136	-0.00362018	-0.00461012	-0.0061926
1061	-0.00343131	-0.00376427	-0.00529953	-0.00651598		1161	-0.00315857	-0.00361618	-0.00460152	-0.00618795
1062	-0.00342945	-0.00376058	-0.00529488	-0.0065147		1162	-0.00315345	-0.00361186	-0.00459408	-0.00618363
1063	-0.00342689	-0.00375818	-0.0052886	-0.00651214		1163	-0.00315136	-0.00360849	-0.00458664	-0.00617891
1064	-0.0034248	-0.00375546	-0.00528418	-0.00651078		1164	-0.00314764	-0.00360409	-0.0045792	-0.0061737
1065	-0.00342364	-0.00375466	-0.00527697	-0.00650822		1165	-0.00314439	-0.00360057	-0.00457222	-0.00616882
1066	-0.00342108	-0.0037529	-0.00527209	-0.00650653		1166	-0.00314067	-0.00359705	-0.00456455	-0.00616386
1067	-0.00341992	-0.0037533	-0.00526535	-0.00650461		1167	-0.00313695	-0.00359193	-0.00455757	-0.00615986
1068	-0.00341759	-0.0037521	-0.00526093	-0.00650261		1168	-0.00313392	-0.00358936	-0.00454827	-0.00615489
1069	-0.00341666	-0.0037529	-0.00525558	-0.00650013		1169	-0.00312951	-0.00358472	-0.00454107	-0.00615113
1070	-0.0034141	-0.0037525	-0.00525024	-0.00649789		1170	-0.00312648	-0.00358216	-0.004532	-0.00614609
1071	-0.00341248	-0.00375426	-0.00524373	-0.00649613		1171	-0.00312299	-0.0035784	-0.00452665	-0.00614185
1072	-0.00341062	-0.00375562	-0.00523675	-0.00649405		1172	-0.00311997	-0.00357632	-0.00451688	-0.00613672
1073	-0.00340922	-0.00375738	-0.00523164	-0.00649205		1173	-0.00311579	-0.00357199	-0.0045113	-0.0061332
1074	-0.00340713	-0.00376002	-0.00522559	-0.00648949		1174	-0.00311253	-0.00356959	-0.00450107	-0.0061284
1075	-0.00340573	-0.00376234	-0.00521978	-0.00648709		1175	-0.00310742	-0.00356567	-0.0044941	-0.00612431
1076	-0.00340457	-0.00376546	-0.00521303	-0.00648436		1176	-0.00310556	-0.00356431	-0.00448549	-0.00611999
1077	-0.00340364	-0.00376875	-0.00520699	-0.00648188		1177	-0.00310184	-0.00356127	-0.00447991	-0.00611503
1078	-0.00340364	-0.00377251	-0.00519838	-0.00647988		1178	-0.00309858	-0.00355847	-0.00447085	-0.00611039
1079	-0.00340201	-0.00377635	-0.00519304	-0.00647748		1179	-0.00309486	-0.00355622	-0.00446457	-0.00610582
1080	-0.00340201	-0.00378043	-0.00518467	-0.00647516		1180	-0.00309021	-0.00355414	-0.00445643	-0.00610206
1081	-0.00340062	-0.00378444	-0.00517955	-0.00647268		1181	-0.00308696	-0.00355214	-0.00444922	-0.00609774
1082	-0.00339992	-0.00378932	-0.00517188	-0.00646915		1182	-0.00308347	-0.00354942	-0.00444271	-0.00609286
1083	-0.00339922	-0.00379356	-0.00516746	-0.00646755		1183	-0.00308021	-0.00354798	-0.00443411	-0.00608781
1084	-0.00339946	-0.00379836	-0.00516002	-0.00646483		1184	-0.00307696	-0.00354502	-0.00442806	-0.00608365
1085	-0.00339852	-0.00380204	-0.00515351	-0.00646275		1185	-0.00307393	-0.00354342	-0.00442085	-0.00607853
1086	-0.00339852	-0.00380645	-0.00514653	-0.00646035		1186	-0.00306998	-0.00354061	-0.00441551	-0.00607373
1087	-0.00339736	-0.00381045	-0.00513979	-0.00645795		1187	-0.0030658	-0.00353861	-0.00440807	-0.00606877
1088	-0.00339643	-0.00381485	-0.00513398	-0.00645563		1188	-0.00306184	-0.00353541	-0.00440272	-0.0060638
1089	-0.00339388	-0.00381878	-0.00512723	-0.00645282		1189	-0.00305882	-0.00353357	-0.00439528	-0.00605892
1090	-0.00339388	-0.00382254	-0.00512119	-0.00645082		1190	-0.0030544	-0.00353085	-0.0043897	-0.00605387
1091	-0.00339341	-0.00382646	-0.00511445	-0.00644762		1191	-0.00305161	-0.00352853	-0.00438226	-0.00604899
1092	-0.00339341	-0.00382918	-0.00510794	-0.0064457		1192	-0.00304836	-0.00352525	-0.00437644	-0.00604355
1093	-0.00339202	-0.00383222	-0.00510026	-0.00644274		1193	-0.0030451	-0.0035222	-0.00436947	-0.00603931
1094	-0.00339108	-0.00383447	-0.00509468	-0.00644058		1194	-0.00304092	-0.00351892	-0.00436389	-0.0060341
1095	-0.00338992	-0.00383751	-0.00508724	-0.0064373		1195	-0.0030379	-0.00351524	-0.00435761	-0.00602938
1096	-0.00338829	-0.00383879	-0.00508189	-0.00643425		1196	-0.00303487	-0.00351236	-0.00434994	-0.00602466
1097	-0.00338853	-0.00384055	-0.00507469	-0.00643105		1197	-0.00303255	-0.00350796	-0.00434389	-0.00601986
1098	-0.0033876	-0.00384087	-0.00506911	-0.00642809		1198	-0.00302929	-0.00350515	-0.00433599	-0.00601529
1099	-0.0033876	-0.00384191	-0.0050619	-0.00642521		1199	-0.00302511	-0.00350075	-0.00432994	-0.00601041
1100	-0.00338551	-0.00384159	-0.00505609	-0.00642241		1200	-0.00302255	-0.00349803	-0.00432227	-0.00600489
1101	-0.00338457	-0.00384207	-0.00504911	-0.00641848		1201	-0.00301697	-0.00349315	-0.00431646	-0.00600056
1102	-0.00338178	-0.00384135	-0.00504376	-0.00641576		1202	-0.00301488	-0.00349043	-0.00430832	-0.00599568
1103	-0.00338155	-0.00384047	-0.00503748	-0.0064116		1203	-0.00301046	-0.0034857	-0.0043025	-0.00599008
1104	-0.00337923	-0.00383839	-0.00503097	-0.006408		1204	-0.00300767	-0.00348194	-0.0042939	-0.0059852
1105	-0.0033783	-0.00383591	-0.00502539	-0.00640528		1205	-0.00300325	-0.00347682	-0.00428786	-0.00597959
1106	-0.00337597	-0.00383406	-0.00501888	-0.0064016		1206	-0.00299953	-0.00347378	-0.00427925	-0.00597471
1107	-0.00337365	-0.0038315	-0.00501307	-0.00639871		1207	-0.00299441	-0.00346921	-0.00427274	-0.00596871
1108	-0.00337109	-0.00382934	-0.0050061	-0.00639479		1208	-0.00299186	-0.00346489	-0.00426553	-0.00596398
1109	-0.00336737	-0.00382574	-0.00500191	-0.00639167		1209	-0.0029879	-0.00346057	-0.00425809	-0.00595838
1110	-0.00336597	-0.00382286	-0.00499354	-0.00638695		1210	-0.00298418	-0.00345649	-0.00425065	-0.00595318
1111	-0.00336225	-0.00381869	-0.00498889	-0.00638326		1211	-0.00298023	-0.00345248	-0.00424391	-0.00594669
1112	-0.0033597	-0.00381557	-0.00498075	-0.0063795		1212	-0.00297581	-0.003448	-0.00423624	-0.00594157
1113	-0.00335644	-0.00381141	-0.00497587	-0.0063759		1213	-0.0029714	-0.00344472	-0.00422926	-0.00593565
1114	-0.00335342	-0.00380821	-0.00496912	-0.00637222		1214	-0.00296814	-0.00344	-0.00422298	-0.005931
1115	-0.0033497	-0.00380405	-0.00496331	-0.00636806		1215	-0.00296395	-0.00343607	-0.00421531	-0.005925
1116	-0.00334691	-0.00380028	-0.00495657	-0.00636421		1216	-0.00295884	-0.00343087	-0.0042102	-0.00591964
1117	-0.00334249	-0.00379556	-0.00494983	-0.00636005		1217	-0.00295582	-0.00342767	-0.00420276	-0.00591339
1118	-0.00333877	-0.00379156	-0.00494308	-0.00635581		1218	-0.0029507	-0.00342311	-0.00419787	-0.00590755
1119	-0.00333435	-0.00378708	-0.00493611	-0.00635181		1219	-0.00294768	-0.00341934	-0.0041895	-0.00590147
1120	-0.00333086	-0.00378235	-0.0049289	-0.0063482		1220	-0.0029428	-0.00341438	-0.00418346	-0.0058957
1121	-0.00332621	-0.00377875	-0.00492169	-0.0063438		1221	-0.00293861	-0.00341022	-0.00417578	-0.00589026
1122	-0.00332296	-0.00377467	-0.00491518	-0.0063398		1222	-0.00293326	-0.00340574	-0.00417067	-0.00588386
1123	-0.003319	-0.00377123	-0.00490611	-0.00633532		1223	-0.00292954	-0.00340157	-0.00416346	-0.00587809
1124	-0.00331552	-0.00376667	-0.0048996	-0.00633123		1224	-0.00292443	-0.00339741	-0.00415718	-0.00587185
1125	-0.00331133	-0.00376306	-0.00489053	-0.00632675		1225	-0.00291908	-0.00339317	-0.00415044	-0.00586609
1126	-0.00330808	-0.00375842	-0.00488333	-0.00632307		1226	-0.00291396	-0.00338901	-0.00414393	-0.00586032
1127	-0.00330389	-0.00375602	-0.00487356	-0.00631915		1227	-0.00290955	-0.00338404	-0.00413719	-0.00585456
1128	-0.00329854	-0.0037513	-0.00486612	-0.00631563		1228	-0.00290466	-0.0033806	-0.00413114	-0.00584848
1129	-0.00329529	-0.00374785	-0.00485705	-0.00631139		1229	-0.00290048	-0.00337588	-0.00412603	-0.00584279
1130	-0.00329087	-0.00374337	-0.00484961	-0.00630786		1230	-0.00289676	-0.00337172	-0.00411928	-0.00583631
1131	-0.00328692	-0.00374009	-0.00484008	-0.00630402		1231	-0.00289164	-0.00336635	-0.00411417	-0.00583055
1132	-0.00328111	-0.00373657	-0.00483171	-0.00630034		1232	-0.00288653	-0.00336275	-0.00410626	-0.0058239
1133	-0.00327646	-0.00373257	-0.00482287	-0.00629729		1233	-0.00288048	-0.00335731	-0.00410092	-0.00581806
1134	-0.00327111	-0.00372928	-0.00481404	-0.00629345		1234	-0.00287514	-0.00335347	-0.00409324	-0.00581182
1135	-0.00326715	-0.00372536	-0.00480543	-0.00629057		1235	-0.00286932	-0.00334826	-0.00408836	-0.00580573
1136	-0.00326227	-0.00372248	-0.00479683	-0.00628697		1236	-0.00286583	-0.00334394	-0.00408068	-0.00579909
1137	-0.00325855	-0.00371904	-0.00478962	-0.00628361		1237	-0.00285956	-0.0033393	-0.00407511	-0.00579204
1138	-0.0032539	-0.00371608	-0.00477986	-0.00627937		1238	-0.00285491	-0.0033337	-0.0040672	-0.00578556
1139	-0.00324925	-0.00371095	-0.00477172	-0.00627616		1239	-0.00284816	-0.00332857	-0.00406022	-0.00577932
1140	-0.00324507	-0.00370783	-0.00476288	-0.00627224		1240	-0.00284258	-0.00332385	-0.00405325	-0.00577299
1141	-0.00324041	-0.00370351	-0.00475544	-0.00626864		1241	-0.00283724	-0.00331921	-0.00404534	-0.00576643
1142	-0.00323693	-0.00370015	-0.00474661	-0.0062648		1242	-0.00283165	-0.00331448	-0.00403883	-0.00575987
1143	-0.00323181	-0.00369582	-0.00474056	-0.00626095		1243	-0.002827	-0.00330952	-0.00403023	-0.00575226
1144	-0.00322972	-0.0036923	-0.00473173	-0.00625703		1244	-0.00282166	-0.00330408	-0.00402349	-0.00574602
1145	-0.00322391	-0.00368734	-0.00472475	-0.00625327		1245	-0.00281538	-0.0033004	-0.00401512	-0.00573961
1146	-0.00322112	-0.00368318	-0.00471545	-0.00624887		1246	-0.00280933	-0.00329551	-0.00400907	-0.00573377
1147	-0.00321623	-0.0036787	-0.00470917	-0.00624526		1247	-0.00280515	-0.00329239	-0.00399977	-0.00572721
1148	-0.00321228	-0.00367429	-0.00470173	-0.00624166		1248	-0.00279957	-0.00328791	-0.00399373	-0.00572096
1149	-0.0032074	-0.00367021	-0.00469476	-0.00623726		1249	-0.00279538	-0.00328455	-0.00398512	-0.00571464
1150	-0.00320345	-0.00366549	-0.00468802	-0.00623406		1250	-0.00279073	-0.00328014	-0.00397838	-0.0057088
1151	-0.00319973	-0.00366092	-0.00467895	-0.0062299		1251	-0.00278608	-0.00327638	-0.00396954	-0.00570327
1152	-0.00319577	-0.00365644	-0.0046722	-0.00622645		1252	-0.00278143	-0.00327294	-0.0039635	-0.00569767
1153	-0.00319205	-0.00365196	-0.00466407	-0.00622229		1253	-0.00277771	-0.00326982	-0.00395652	-0.00569215
1154	-0.00318694	-0.00364652	-0.00465686	-0.00621821		1254	-0.00277213	-0.0032663	-0.00394885	-0.00568646
1155	-0.00318252	-0.00364347	-0.00464825	-0.00621397		1255	-0.00276864	-0.00326269	-0.00394095	-0.00568086
1156	-0.00317787	-0.00363787	-0.00464151	-0.00621068		1256	-0.00276492	-0.00325965	-0.0039335	-0.0056751
1157	-0.00317508	-0.00363451	-0.00463244	-0.00620612		1257	-0.00276144	-0.00325541	-0.00392699	-0.00567013
1158	-0.00317043	-0.00362907	-0.00462547	-0.00620148		1258	-0.00275748	-0.00325293	-0.00391955	-0.00566373
1159	-0.00316694	-0.00362522	-0.0046164	-0.00619732		1259	-0.00275353	-0.00324909	-0.00391444	-0.00565861
1160	-0.00316136	-0.00362018	-0.00461012	-0.0061926		1260	-0.00274981	-0.003247	-0.0039056	-0.00565268
1161	-0.00315857	-0.00361618	-0.00460152	-0.00618795		1261	-0.00274632	-0.00324276	-0.00389956	-0.00564756
1162	-0.00315345	-0.00361186	-0.00459408	-0.00618363		1262	-0.00274307	-0.00324116	-0.00389095	-0.00564164
1163	-0.00315136	-0.00360849	-0.00458664	-0.00617891		1263	-0.00273958	-0.0032378	-0.00388561	-0.00563604
1164	-0.00314764	-0.00360409	-0.0045792	-0.0061737		1264	-0.00273702	-0.00323596	-0.0038784	-0.00563035
1165	-0.00314439	-0.00360057	-0.00457222	-0.00616882		1265	-0.00273307	-0.00323292	-0.00387282	-0.00562467
1166	-0.00314067	-0.00359705	-0.00456455	-0.00616386		1266	-0.00273028	-0.00323084	-0.00386514	-0.00561914
1167	-0.00313695	-0.00359193	-0.00455757	-0.00615986		1267	-0.00272609	-0.00322787	-0.00385933	-0.0056133
1168	-0.00313392	-0.00358936	-0.00454827	-0.00615489		1268	-0.00272377	-0.00322627	-0.00385119	-0.00560786
1169	-0.00312951	-0.00358472	-0.00454107	-0.00615113		1269	-0.00271912	-0.00322331	-0.00384491	-0.00560177
1170	-0.00312648	-0.00358216	-0.004532	-0.00614609		1270	-0.00271702	-0.00322163	-0.00383864	-0.00559673
1171	-0.00312299	-0.0035784	-0.00452665	-0.00614185		1271	-0.002714	-0.00322003	-0.00383259	-0.00559089
1172	-0.00311997	-0.00357632	-0.00451688	-0.00613672		1272	-0.00271028	-0.00321739	-0.00382562	-0.0055852
1173	-0.00311579	-0.00357199	-0.0045113	-0.0061332		1273	-0.00270703	-0.00321515	-0.00381818	-0.00557968
1174	-0.00311253	-0.00356959	-0.00450107	-0.0061284		1274	-0.00270214	-0.00321259	-0.00381213	-0.0055744
1175	-0.00310742	-0.00356567	-0.0044941	-0.00612431		1275	-0.00269935	-0.00321114	-0.00380492	-0.00556832
1176	-0.00310556	-0.00356431	-0.00448549	-0.00611999		1276	-0.00269494	-0.00320754	-0.00379934	-0.00556327
1177	-0.00310184	-0.00356127	-0.00447991	-0.00611503		1277	-0.00269121	-0.00320522	-0.0037912	-0.00555711
1178	-0.00309858	-0.00355847	-0.00447085	-0.00611039		1278	-0.00268587	-0.00320178	-0.00378469	-0.00555199
1179	-0.00309486	-0.00355622	-0.00446457	-0.00610582		1279	-0.00268261	-0.00319938	-0.00377679	-0.00554574
1180	-0.00309021	-0.00355414	-0.00445643	-0.00610206		1280	-0.00267587	-0.00319562	-0.00377028	-0.00554022
1181	-0.00308696	-0.00355214	-0.00444922	-0.00609774		1281	-0.00267192	-0.00319225	-0.00376261	-0.00553438
1182	-0.00308347	-0.00354942	-0.00444271	-0.00609286		1282	-0.0026668	-0.00318905	-0.00375633	-0.00552813
1183	-0.00308021	-0.00354798	-0.00443411	-0.00608781		1283	-0.00266308	-0.00318537	-0.00374749	-0.00552261
1184	-0.00307696	-0.00354502	-0.00442806	-0.00608365		1284	-0.00265773	-0.00318177	-0.00374028	-0.00551653
1185	-0.00307393	-0.00354342	-0.00442085	-0.00607853		1285	-0.00265262	-0.00317801	-0.00373261	-0.00551124
1186	-0.00306998	-0.00354061	-0.00441551	-0.00607373		1286	-0.0026475	-0.00317408	-0.00372517	-0.00550468
1187	-0.0030658	-0.00353861	-0.00440807	-0.00606877		1287	-0.00264355	-0.00316952	-0.0037175	-0.00549916
1188	-0.00306184	-0.00353541	-0.00440272	-0.0060638		1288	-0.00263797	-0.00316592	-0.00370889	-0.00549291
1189	-0.00305882	-0.00353357	-0.00439528	-0.00605892		1289	-0.00263425	-0.00316104	-0.00370145	-0.00548811
1190	-0.0030544	-0.00353085	-0.0043897	-0.00605387		1290	-0.0026296	-0.00315719	-0.00369146	-0.00548195
1191	-0.00305161	-0.00352853	-0.00438226	-0.00604899		1291	-0.00262425	-0.00315183	-0.00368471	-0.00547626
1192	-0.00304836	-0.00352525	-0.00437644	-0.00604355		1292	-0.002621	-0.00314791	-0.00367564	-0.0054701
1193	-0.0030451	-0.0035222	-0.00436947	-0.00603931		1293	-0.00261588	-0.00314287	-0.00366867	-0.00546386
1194	-0.00304092	-0.00351892	-0.00436389	-0.0060341		1294	-0.00261193	-0.00313902	-0.00365983	-0.00545769
1195	-0.0030379	-0.00351524	-0.00435761	-0.00602938		1295	-0.00260728	-0.00313374	-0.00365286	-0.00545153
1196	-0.00303487	-0.00351236	-0.00434994	-0.00602466		1296	-0.00260332	-0.00313022	-0.00364425	-0.00544544
1197	-0.00303255	-0.00350796	-0.00434389	-0.00601986		1297	-0.00259821	-0.0031255	-0.00363844	-0.00543896
1198	-0.00302929	-0.00350515	-0.00433599	-0.00601529		1298	-0.00259542	-0.00312165	-0.00362937	-0.00543264
1199	-0.00302511	-0.00350075	-0.00432994	-0.00601041		1299	-0.00258984	-0.00311685	-0.00362333	-0.00542663
1200	-0.00302255	-0.00349803	-0.00432227	-0.00600489		1300	-0.00258705	-0.00311261	-0.00361566	-0.00542063
1201	-0.00301697	-0.00349315	-0.00431646	-0.00600056		1301	-0.0025824	-0.00310781	-0.00360868	-0.00541527
1202	-0.00301488	-0.00349043	-0.00430832	-0.00599568		1302	-0.00257961	-0.00310348	-0.00360147	-0.00540854
1203	-0.00301046	-0.0034857	-0.0043025	-0.00599008		1303	-0.00257542	-0.0030994	-0.00359427	-0.00540246
1204	-0.00300767	-0.00348194	-0.0042939	-0.0059852		1304	-0.00257124	-0.00309436	-0.00358706	-0.00539702
1205	-0.00300325	-0.00347682	-0.00428786	-0.00597959		1305	-0.00256775	-0.0030906	-0.00358031	-0.00539101
1206	-0.00299953	-0.00347378	-0.00427925	-0.00597471		1306	-0.00256473	-0.00308563	-0.0035738	-0.00538581
1207	-0.00299441	-0.00346921	-0.00427274	-0.00596871		1307	-0.0025617	-0.00308275	-0.00356636	-0.00537925
1208	-0.00299186	-0.00346489	-0.00426553	-0.00596398		1308	-0.00255752	-0.00307747	-0.00356101	-0.00537436
1209	-0.0029879	-0.00346057	-0.00425809	-0.00595838		1309	-0.00255403	-0.00307395	-0.00355288	-0.00536836
1210	-0.00298418	-0.00345649	-0.00425065	-0.00595318		1310	-0.00255031	-0.00306882	-0.0035473	-0.00536227
1211	-0.00298023	-0.00345248	-0.00424391	-0.00594669		1311	-0.00254682	-0.00306482	-0.00353893	-0.00535587
1212	-0.00297581	-0.003448	-0.00423624	-0.00594157		1312	-0.00254241	-0.00306034	-0.00353358	-0.00535035
1213	-0.0029714	-0.00344472	-0.00422926	-0.00593565		1313	-0.00253962	-0.00305594	-0.00352614	-0.00534475
1214	-0.00296814	-0.00344	-0.00422298	-0.005931		1314	-0.00253566	-0.00305169	-0.00351939	-0.00533794
1215	-0.00296395	-0.00343607	-0.00421531	-0.005925		1315	-0.00253171	-0.00304785	-0.00351288	-0.00533226
1216	-0.00295884	-0.00343087	-0.0042102	-0.00591964		1316	-0.00252706	-0.00304353	-0.00350544	-0.00532601
1217	-0.00295582	-0.00342767	-0.00420276	-0.00591339		1317	-0.00252264	-0.00303921	-0.00349917	-0.00532025
1218	-0.0029507	-0.00342311	-0.00419787	-0.00590755		1318	-0.00251846	-0.00303544	-0.00349265	-0.00531345
1219	-0.00294768	-0.00341934	-0.0041895	-0.00590147		1319	-0.0025145	-0.00303168	-0.00348638	-0.00530817
1220	-0.0029428	-0.00341438	-0.00418346	-0.0058957		1320	-0.00251148	-0.003028	-0.00347847	-0.0053012
1221	-0.00293861	-0.00341022	-0.00417578	-0.00589026		1321	-0.00250753	-0.0030236	-0.00347243	-0.00529528
1222	-0.00293326	-0.00340574	-0.00417067	-0.00588386		1322	-0.00250334	-0.00302008	-0.00346522	-0.00528863
1223	-0.00292954	-0.00340157	-0.00416346	-0.00587809		1323	-0.00249869	-0.00301559	-0.00345987	-0.00528207
1224	-0.00292443	-0.00339741	-0.00415718	-0.00587185		1324	-0.00249451	-0.00301263	-0.00345196	-0.00527503
1225	-0.00291908	-0.00339317	-0.00415044	-0.00586609		1325	-0.00248916	-0.00300775	-0.00344592	-0.00526838
1226	-0.00291396	-0.00338901	-0.00414393	-0.00586032		1326	-0.00248614	-0.00300439	-0.00343801	-0.0052611
1227	-0.00290955	-0.00338404	-0.00413719	-0.00585456		1327	-0.00248125	-0.00299934	-0.0034322	-0.00525429
1228	-0.00290466	-0.0033806	-0.00413114	-0.00584848		1328	-0.00247614	-0.00299574	-0.00342546	-0.00524805
1229	-0.00290048	-0.00337588	-0.00412603	-0.00584279		1329	-0.00247149	-0.0029907	-0.00341825	-0.00524101
1230	-0.00289676	-0.00337172	-0.00411928	-0.00583631		1330	-0.00246637	-0.00298598	-0.00341081	-0.00523436
1231	-0.00289164	-0.00336635	-0.00411417	-0.00583055		1331	-0.00246149	-0.00298205	-0.00340407	-0.005227
1232	-0.00288653	-0.00336275	-0.00410626	-0.0058239		1332	-0.00245754	-0.00297661	-0.00339663	-0.0052202
1233	-0.00288048	-0.00335731	-0.00410092	-0.00581806		1333	-0.00245219	-0.00297253	-0.00338965	-0.00521379
1234	-0.00287514	-0.00335347	-0.00409324	-0.00581182		1334	-0.00244731	-0.00296732	-0.00338314	-0.00520811
1235	-0.00286932	-0.00334826	-0.00408836	-0.00580573		1335	-0.00244219	-0.00296292	-0.00337686	-0.00520122
1236	-0.00286583	-0.00334394	-0.00408068	-0.00579909		1336	-0.00243777	-0.00295764	-0.00336942	-0.00519514
1237	-0.00285956	-0.0033393	-0.00407511	-0.00579204		1337	-0.00243359	-0.00295372	-0.00336152	-0.00518786
1238	-0.00285491	-0.0033337	-0.0040672	-0.00578556		1338	-0.00242754	-0.00294795	-0.00335547	-0.00518145
1239	-0.00284816	-0.00332857	-0.00406022	-0.00577932		1339	-0.00242289	-0.00294387	-0.00334687	-0.00517465
1240	-0.00284258	-0.00332385	-0.00405325	-0.00577299		1340	-0.00241592	-0.00293827	-0.00334292	-0.00516825
1241	-0.00283724	-0.00331921	-0.00404534	-0.00576643		1341	-0.00241127	-0.00293451	-0.00333524	-0.0051612
1242	-0.00283165	-0.00331448	-0.00403883	-0.00575987		1342	-0.00240569	-0.0029285	-0.0033285	-0.00515384
1243	-0.002827	-0.00330952	-0.00403023	-0.00575226		1343	-0.00240057	-0.0029241	-0.00332106	-0.00514687
1244	-0.00282166	-0.00330408	-0.00402349	-0.00574602		1344	-0.00239546	-0.0029193	-0.00331408	-0.00513951
1245	-0.00281538	-0.0033004	-0.00401512	-0.00573961		1345	-0.00238988	-0.00291337	-0.00330688	-0.00513302
1246	-0.00280933	-0.00329551	-0.00400907	-0.00573377		1346	-0.00238383	-0.00290841	-0.0032999	-0.0051259
1247	-0.00280515	-0.00329239	-0.00399977	-0.00572721		1347	-0.00237848	-0.00290385	-0.00329409	-0.00511998
1248	-0.00279957	-0.00328791	-0.00399373	-0.00572096		1348	-0.0023729	-0.00289872	-0.00328735	-0.00511285
1249	-0.00279538	-0.00328455	-0.00398512	-0.00571464		1349	-0.00236849	-0.00289344	-0.00328014	-0.00510613
1250	-0.00279073	-0.00328014	-0.00397838	-0.0057088		1350	-0.00236383	-0.0028888	-0.00327293	-0.00509852
1251	-0.00278608	-0.00327638	-0.00396954	-0.00570327		1351	-0.00235872	-0.00288344	-0.00326735	-0.00509156
1252	-0.00278143	-0.00327294	-0.0039635	-0.00569767		1352	-0.00235407	-0.00287903	-0.00326061	-0.0050838
1253	-0.00277771	-0.00326982	-0.00395652	-0.00569215		1353	-0.00234965	-0.00287375	-0.00325642	-0.00507667
1254	-0.00277213	-0.0032663	-0.00394885	-0.00568646		1354	-0.00234523	-0.00286895	-0.00324968	-0.00506939
1255	-0.00276864	-0.00326269	-0.00394095	-0.00568086		1355	-0.00234081	-0.00286439	-0.0032441	-0.00506202
1256	-0.00276492	-0.00325965	-0.0039335	-0.0056751		1356	-0.00233593	-0.00285926	-0.00323666	-0.00505442
1257	-0.00276144	-0.00325541	-0.00392699	-0.00567013		1357	-0.00233082	-0.00285358	-0.00323247	-0.00504713
1258	-0.00275748	-0.00325293	-0.00391955	-0.00566373		1358	-0.00232686	-0.00284886	-0.00322596	-0.00503977
1259	-0.00275353	-0.00324909	-0.00391444	-0.00565861		1359	-0.00232105	-0.00284397	-0.00322108	-0.00503257
1260	-0.00274981	-0.003247	-0.0039056	-0.00565268		1360	-0.00231756	-0.00283949	-0.00321503	-0.00502568
1261	-0.00274632	-0.00324276	-0.00389956	-0.00564756		1361	-0.00231268	-0.00283485	-0.00320899	-0.00501896
1262	-0.00274307	-0.00324116	-0.00389095	-0.00564164		1362	-0.00230826	-0.0028294	-0.00320294	-0.00501184
1263	-0.00273958	-0.0032378	-0.00388561	-0.00563604		1363	-0.00230361	-0.00282468	-0.00319713	-0.00500447
1264	-0.00273702	-0.00323596	-0.0038784	-0.00563035		1364	-0.00229966	-0.00281964	-0.00319248	-0.00499807
1265	-0.00273307	-0.00323292	-0.00387282	-0.00562467		1365	-0.00229454	-0.00281548	-0.00318597	-0.00499134
1266	-0.00273028	-0.00323084	-0.00386514	-0.00561914		1366	-0.00229036	-0.00281067	-0.00318039	-0.0049847
1267	-0.00272609	-0.00322787	-0.00385933	-0.0056133		1367	-0.00228687	-0.00280731	-0.00317295	-0.00497789
1268	-0.00272377	-0.00322627	-0.00385119	-0.00560786		1368	-0.00228176	-0.00280219	-0.00316806	-0.00497109
1269	-0.00271912	-0.00322331	-0.00384491	-0.00560177		1369	-0.00227757	-0.00279843	-0.00316132	-0.00496389
1270	-0.00271702	-0.00322163	-0.00383864	-0.00559673		1370	-0.00227292	-0.00279282	-0.00315551	-0.00495652
1271	-0.002714	-0.00322003	-0.00383259	-0.00559089		1371	-0.00226874	-0.00278986	-0.00314784	-0.00494924
1272	-0.00271028	-0.00321739	-0.00382562	-0.0055852		1372	-0.00226362	-0.00278514	-0.00314156	-0.00494235
1273	-0.00270703	-0.00321515	-0.00381818	-0.00557968		1373	-0.00225967	-0.00278162	-0.00313412	-0.00493515
1274	-0.00270214	-0.00321259	-0.00381213	-0.0055744		1374	-0.00225432	-0.00277681	-0.00312807	-0.00492763
1275	-0.00269935	-0.00321114	-0.00380492	-0.00556832		1375	-0.0022499	-0.00277209	-0.0031211	-0.00492066
1276	-0.00269494	-0.00320754	-0.00379934	-0.00556327		1376	-0.00224455	-0.00276745	-0.00311505	-0.00491346
1277	-0.00269121	-0.00320522	-0.0037912	-0.00555711		1377	-0.0022399	-0.00276281	-0.00310924	-0.00490689
1278	-0.00268587	-0.00320178	-0.00378469	-0.00555199		1378	-0.00223549	-0.00275849	-0.00310249	-0.00489937
1279	-0.00268261	-0.00319938	-0.00377679	-0.00554574		1379	-0.00223084	-0.00275416	-0.00309645	-0.00489273
1280	-0.00267587	-0.00319562	-0.00377028	-0.00554022		1380	-0.00222526	-0.00275024	-0.00308947	-0.0048848
1281	-0.00267192	-0.00319225	-0.00376261	-0.00553438		1381	-0.00222177	-0.0027444	-0.00308389	-0.00487824
1282	-0.0026668	-0.00318905	-0.00375633	-0.00552813		1382	-0.00221689	-0.00274031	-0.00307831	-0.00487047
1283	-0.00266308	-0.00318537	-0.00374749	-0.00552261		1383	-0.00221317	-0.00273479	-0.00307297	-0.00486391
1284	-0.00265773	-0.00318177	-0.00374028	-0.00551653		1384	-0.00220944	-0.00273063	-0.00306622	-0.00485606
1285	-0.00265262	-0.00317801	-0.00373261	-0.00551124		1385	-0.00220433	-0.00272566	-0.00306227	-0.00484894
1286	-0.0026475	-0.00317408	-0.00372517	-0.00550468		1386	-0.00220061	-0.0027207	-0.00305553	-0.0048415
1287	-0.00264355	-0.00316952	-0.0037175	-0.00549916		1387	-0.00219619	-0.00271494	-0.00305157	-0.00483357
1288	-0.00263797	-0.00316592	-0.00370889	-0.00549291		1388	-0.00219247	-0.00271078	-0.00304483	-0.00482685
1289	-0.00263425	-0.00316104	-0.00370145	-0.00548811		1389	-0.00218736	-0.00270565	-0.00303925	-0.00481956
1290	-0.0026296	-0.00315719	-0.00369146	-0.00548195		1390	-0.00218387	-0.00270093	-0.00303321	-0.00481268
1291	-0.00262425	-0.00315183	-0.00368471	-0.00547626		1391	-0.00217759	-0.00269661	-0.00302763	-0.00480532
1292	-0.002621	-0.00314791	-0.00367564	-0.0054701		1392	-0.00217457	-0.00269213	-0.00302042	-0.00479811
1293	-0.00261588	-0.00314287	-0.00366867	-0.00546386		1393	-0.00217015	-0.00268812	-0.00301577	-0.00479067
1294	-0.00261193	-0.00313902	-0.00365983	-0.00545769		1394	-0.00216643	-0.00268332	-0.00300926	-0.00478354
1295	-0.00260728	-0.00313374	-0.00365286	-0.00545153		1395	-0.00216155	-0.00267996	-0.00300298	-0.00477698
1296	-0.00260332	-0.00313022	-0.00364425	-0.00544544		1396	-0.00215806	-0.0026754	-0.0029974	-0.00477066
1297	-0.00259821	-0.0031255	-0.00363844	-0.00543896		1397	-0.00215434	-0.0026722	-0.00298996	-0.00476249
1298	-0.00259542	-0.00312165	-0.00362937	-0.00543264		1398	-0.00214876	-0.00266763	-0.00298484	-0.00475513
1299	-0.00258984	-0.00311685	-0.00362333	-0.00542663		1399	-0.00214457	-0.00266339	-0.00297764	-0.0047476
1300	-0.00258705	-0.00311261	-0.00361566	-0.00542063		1400	-0.00214015	-0.00265883	-0.00297368	-0.00474104
1301	-0.0025824	-0.00310781	-0.00360868	-0.00541527		1401	-0.0021362	-0.00265547	-0.00296647	-0.00473383
1302	-0.00257961	-0.00310348	-0.00360147	-0.00540854		1402	-0.00213178	-0.00265154	-0.00296089	-0.00472663
1303	-0.00257542	-0.0030994	-0.00359427	-0.00540246		1403	-0.00212806	-0.0026477	-0.00295322	-0.00471943
1304	-0.00257124	-0.00309436	-0.00358706	-0.00539702		1404	-0.00212272	-0.00264354	-0.00294811	-0.0047119
1305	-0.00256775	-0.0030906	-0.00358031	-0.00539101		1405	-0.00211853	-0.00263922	-0.00294113	-0.00470438
1306	-0.00256473	-0.00308563	-0.0035738	-0.00538581		1406	-0.00211411	-0.00263513	-0.00293532	-0.00469661
1307	-0.0025617	-0.00308275	-0.00356636	-0.00537925		1407	-0.00211063	-0.00263073	-0.00292811	-0.00468941
1308	-0.00255752	-0.00307747	-0.00356101	-0.00537436		1408	-0.00210597	-0.00262737	-0.00292206	-0.00468236
1309	-0.00255403	-0.00307395	-0.00355288	-0.00536836		1409	-0.00210086	-0.00262273	-0.00291555	-0.00467572
1310	-0.00255031	-0.00306882	-0.0035473	-0.00536227		1410	-0.00209644	-0.00261928	-0.00290881	-0.00466788
1311	-0.00254682	-0.00306482	-0.00353893	-0.00535587		1411	-0.00209249	-0.00261456	-0.002903	-0.00466067
1312	-0.00254241	-0.00306034	-0.00353358	-0.00535035		1412	-0.00208714	-0.00261128	-0.00289556	-0.00465323
1313	-0.00253962	-0.00305594	-0.00352614	-0.00534475		1413	-0.00208319	-0.0026072	-0.00288951	-0.00464554
1314	-0.00253566	-0.00305169	-0.00351939	-0.00533794		1414	-0.002079	-0.00260351	-0.00288184	-0.00463858
1315	-0.00253171	-0.00304785	-0.00351288	-0.00533226		1415	-0.00207435	-0.00259935	-0.00287603	-0.00463122
1316	-0.00252706	-0.00304353	-0.00350544	-0.00532601		1416	-0.00207133	-0.00259655	-0.00286859	-0.00462401
1317	-0.00252264	-0.00303921	-0.00349917	-0.00532025		1417	-0.00206668	-0.00259183	-0.00286324	-0.00461673
1318	-0.00251846	-0.00303544	-0.00349265	-0.00531345		1418	-0.00206435	-0.00258823	-0.0028558	-0.00460944
1319	-0.0025145	-0.00303168	-0.00348638	-0.00530817		1419	-0.00205878	-0.00258374	-0.00285022	-0.00460248
1320	-0.00251148	-0.003028	-0.00347847	-0.0053012		1420	-0.00205691	-0.00258006	-0.00284347	-0.00459551
1321	-0.00250753	-0.0030236	-0.00347243	-0.00529528		1421	-0.0020525	-0.00257558	-0.0028365	-0.00458887
1322	-0.00250334	-0.00302008	-0.00346522	-0.00528863		1422	-0.00204947	-0.00257062	-0.00283022	-0.00458215
1323	-0.00249869	-0.00301559	-0.00345987	-0.00528207		1423	-0.00204552	-0.00256685	-0.00282534	-0.00457534
1324	-0.00249451	-0.00301263	-0.00345196	-0.00527503		1424	-0.00204273	-0.00256237	-0.00282069	-0.00456838
1325	-0.00248916	-0.00300775	-0.00344592	-0.00526838		1425	-0.00203831	-0.00255893	-0.00281418	-0.00456117
1326	-0.00248614	-0.00300439	-0.00343801	-0.0052611		1426	-0.00203436	-0.00255325	-0.00280929	-0.00455437
1327	-0.00248125	-0.00299934	-0.0034322	-0.00525429		1427	-0.00203041	-0.00254892	-0.00280348	-0.00454741
1328	-0.00247614	-0.00299574	-0.00342546	-0.00524805		1428	-0.00202599	-0.00254364	-0.00279976	-0.00454109
1329	-0.00247149	-0.0029907	-0.00341825	-0.00524101		1429	-0.0020232	-0.00253964	-0.00279325	-0.0045334
1330	-0.00246637	-0.00298598	-0.00341081	-0.00523436		1430	-0.00201762	-0.00253516	-0.00279069	-0.00452716
1331	-0.00246149	-0.00298205	-0.00340407	-0.005227		1431	-0.0020146	-0.00253115	-0.00278442	-0.00452003
1332	-0.00245754	-0.00297661	-0.00339663	-0.0052202		1432	-0.00200995	-0.00252659	-0.00278116	-0.00451323
1333	-0.00245219	-0.00297253	-0.00338965	-0.00521379		1433	-0.00200599	-0.00252227	-0.00277488	-0.00450602
1334	-0.00244731	-0.00296732	-0.00338314	-0.00520811		1434	-0.00200065	-0.00251715	-0.00277093	-0.00449914
1335	-0.00244219	-0.00296292	-0.00337686	-0.00520122		1435	-0.00199739	-0.00251346	-0.00276442	-0.00449258
1336	-0.00243777	-0.00295764	-0.00336942	-0.00519514		1436	-0.00199251	-0.0025089	-0.00275977	-0.00448521
1337	-0.00243359	-0.00295372	-0.00336152	-0.00518786		1437	-0.00198879	-0.00250562	-0.00275372	-0.00447817
1338	-0.00242754	-0.00294795	-0.00335547	-0.00518145		1438	-0.0019839	-0.00250194	-0.00274907	-0.0044708
1339	-0.00242289	-0.00294387	-0.00334687	-0.00517465		1439	-0.00198042	-0.00249777	-0.00274256	-0.00446376
1340	-0.00241592	-0.00293827	-0.00334292	-0.00516825		1440	-0.00197646	-0.00249441	-0.00273559	-0.00445647
1341	-0.00241127	-0.00293451	-0.00333524	-0.0051612		1441	-0.00197274	-0.00249001	-0.00272931	-0.00444943
1342	-0.00240569	-0.0029285	-0.0033285	-0.00515384		1442	-0.00196902	-0.00248681	-0.00272187	-0.00444207
1343	-0.00240057	-0.0029241	-0.00332106	-0.00514687		1443	-0.00196507	-0.00248241	-0.00271699	-0.00443582
1344	-0.00239546	-0.0029193	-0.00331408	-0.00513951		1444	-0.00196112	-0.00247952	-0.00270908	-0.00442878
1345	-0.00238988	-0.00291337	-0.00330688	-0.00513302		1445	-0.00195693	-0.00247512	-0.0027042	-0.00442213
1346	-0.00238383	-0.00290841	-0.0032999	-0.0051259		1446	-0.00195275	-0.00247184	-0.00269652	-0.00441525
1347	-0.00237848	-0.00290385	-0.00329409	-0.00511998		1447	-0.00194787	-0.00246784	-0.00269094	-0.00440837
1348	-0.0023729	-0.00289872	-0.00328735	-0.00511285		1448	-0.00194484	-0.00246407	-0.00268304	-0.00440164
1349	-0.00236849	-0.00289344	-0.00328014	-0.00510613		1449	-0.00194042	-0.00245935	-0.00267723	-0.00439524
1350	-0.00236383	-0.0028888	-0.00327293	-0.00509852		1450	-0.00193764	-0.00245583	-0.00267048	-0.0043894
1351	-0.00235872	-0.00288344	-0.00326735	-0.00509156		1451	-0.00193298	-0.00245135	-0.0026642	-0.00438235
1352	-0.00235407	-0.00287903	-0.00326061	-0.0050838		1452	-0.00192787	-0.00244799	-0.00265816	-0.00437635
1353	-0.00234965	-0.00287375	-0.00325642	-0.00507667		1453	-0.00192461	-0.00244342	-0.00265188	-0.00436954
1354	-0.00234523	-0.00286895	-0.00324968	-0.00506939		1454	-0.00192136	-0.00243926	-0.0026456	-0.0043637
1355	-0.00234081	-0.00286439	-0.0032441	-0.00506202		1455	-0.00191764	-0.0024359	-0.00263886	-0.00435682
1356	-0.00233593	-0.00285926	-0.00323666	-0.00505442		1456	-0.00191438	-0.00243134	-0.00263258	-0.00435081
1357	-0.00233082	-0.00285358	-0.00323247	-0.00504713		1457	-0.00190997	-0.00242773	-0.00262584	-0.00434361
1358	-0.00232686	-0.00284886	-0.00322596	-0.00503977		1458	-0.00190578	-0.00242381	-0.00262026	-0.00433745
1359	-0.00232105	-0.00284397	-0.00322108	-0.00503257		1459	-0.00190206	-0.00242093	-0.00261259	-0.0043304
1360	-0.00231756	-0.00283949	-0.00321503	-0.00502568		1460	-0.0018988	-0.00241693	-0.00260724	-0.00432432
1361	-0.00231268	-0.00283485	-0.00320899	-0.00501896		1461	-0.00189671	-0.00241365	-0.0026005	-0.00431767
1362	-0.00230826	-0.0028294	-0.00320294	-0.00501184		1462	-0.00189299	-0.00240988	-0.00259654	-0.00431079
1363	-0.00230361	-0.00282468	-0.00319713	-0.00500447		1463	-0.00188881	-0.00240644	-0.00258957	-0.00430391
1364	-0.00229966	-0.00281964	-0.00319248	-0.00499807		1464	-0.00188416	-0.00240244	-0.00258445	-0.00429694
1365	-0.00229454	-0.00281548	-0.00318597	-0.00499134		1465	-0.00188183	-0.00239932	-0.00257841	-0.00429054
1366	-0.00229036	-0.00281067	-0.00318039	-0.0049847		1466	-0.00187765	-0.00239539	-0.00257236	-0.00428326
1367	-0.00228687	-0.00280731	-0.00317295	-0.00497789		1467	-0.00187509	-0.00239155	-0.00256794	-0.00427701
1368	-0.00228176	-0.00280219	-0.00316806	-0.00497109		1468	-0.00187113	-0.00238811	-0.00256306	-0.00426997
1369	-0.00227757	-0.00279843	-0.00316132	-0.00496389		1469	-0.00186858	-0.00238387	-0.00255818	-0.00426332
1370	-0.00227292	-0.00279282	-0.00315551	-0.00495652		1470	-0.00186393	-0.00238027	-0.0025519	-0.00425532
1371	-0.00226874	-0.00278986	-0.00314784	-0.00494924		1471	-0.0018609	-0.00237586	-0.00254725	-0.00424835
1372	-0.00226362	-0.00278514	-0.00314156	-0.00494235		1472	-0.00185672	-0.00237202	-0.00254074	-0.00424043
1373	-0.00225967	-0.00278162	-0.00313412	-0.00493515		1473	-0.00185323	-0.00236706	-0.00253655	-0.00423331
1374	-0.00225432	-0.00277681	-0.00312807	-0.00492763		1474	-0.00184905	-0.00236354	-0.00253004	-0.00422546
1375	-0.0022499	-0.00277209	-0.0031211	-0.00492066		1475	-0.00184463	-0.00235873	-0.00252679	-0.00421754
1376	-0.00224455	-0.00276745	-0.00311505	-0.00491346		1476	-0.001843	-0.00235481	-0.00251912	-0.00420953
1377	-0.0022399	-0.00276281	-0.00310924	-0.00490689		1477	-0.00183905	-0.00234977	-0.00251609	-0.00420177
1378	-0.00223549	-0.00275849	-0.00310249	-0.00489937		1478	-0.00183603	-0.00234561	-0.00250889	-0.004194
1379	-0.00223084	-0.00275416	-0.00309645	-0.00489273		1479	-0.00183161	-0.00234016	-0.0025054	-0.00418672
1380	-0.00222526	-0.00275024	-0.00308947	-0.0048848		1480	-0.00182882	-0.00233568	-0.00249842	-0.00417888
1381	-0.00222177	-0.0027444	-0.00308389	-0.00487824		1481	-0.00182556	-0.00233112	-0.002494	-0.00417183
1382	-0.00221689	-0.00274031	-0.00307831	-0.00487047		1482	-0.00182184	-0.00232664	-0.00248842	-0.00416391
1383	-0.00221317	-0.00273479	-0.00307297	-0.00486391		1483	-0.00181859	-0.00232191	-0.00248494	-0.00415646
1384	-0.00220944	-0.00273063	-0.00306622	-0.00485606		1484	-0.00181487	-0.00231687	-0.00247959	-0.00414982
1385	-0.00220433	-0.00272566	-0.00306227	-0.00484894		1485	-0.00181138	-0.00231223	-0.00247354	-0.00414301
1386	-0.00220061	-0.0027207	-0.00305553	-0.0048415		1486	-0.00180673	-0.00230662	-0.00246819	-0.00413597
1387	-0.00219619	-0.00271494	-0.00305157	-0.00483357		1487	-0.00180347	-0.00230182	-0.00246285	-0.00412885
1388	-0.00219247	-0.00271078	-0.00304483	-0.00482685		1488	-0.00179929	-0.0022975	-0.00245936	-0.00412172
1389	-0.00218736	-0.00270565	-0.00303925	-0.00481956		1489	-0.0017958	-0.00229334	-0.00245331	-0.00411436
1390	-0.00218387	-0.00270093	-0.00303321	-0.00481268		1490	-0.00179092	-0.00228781	-0.00245006	-0.00410795
1391	-0.00217759	-0.00269661	-0.00302763	-0.00480532		1491	-0.00178813	-0.00228357	-0.00244332	-0.00410123
1392	-0.00217457	-0.00269213	-0.00302042	-0.00479811		1492	-0.00178371	-0.00227837	-0.0024382	-0.00409379
1393	-0.00217015	-0.00268812	-0.00301577	-0.00479067		1493	-0.00177952	-0.0022738	-0.00243332	-0.00408682
1394	-0.00216643	-0.00268332	-0.00300926	-0.00478354		1494	-0.00177394	-0.00226876	-0.00242867	-0.0040793
1395	-0.00216155	-0.00267996	-0.00300298	-0.00477698		1495	-0.00176953	-0.0022646	-0.00242355	-0.00407273
1396	-0.00215806	-0.0026754	-0.0029974	-0.00477066		1496	-0.00176464	-0.00225924	-0.0024203	-0.00406545
1397	-0.00215434	-0.0026722	-0.00298996	-0.00476249		1497	-0.00176139	-0.00225476	-0.00241379	-0.00405848
1398	-0.00214876	-0.00266763	-0.00298484	-0.00475513		1498	-0.00175697	-0.00225003	-0.00240914	-0.00405136
1399	-0.00214457	-0.00266339	-0.00297764	-0.0047476		1499	-0.00175186	-0.00224491	-0.00240449	-0.00404512
1400	-0.00214015	-0.00265883	-0.00297368	-0.00474104		1500	-0.00174604	-0.00224043	-0.00239914	-0.00403791
1401	-0.0021362	-0.00265547	-0.00296647	-0.00473383		1501	-0.00174232	-0.00223554	-0.00239565	-0.00403143
1402	-0.00213178	-0.00265154	-0.00296089	-0.00472663		1502	-0.00173674	-0.00223146	-0.0023903	-0.00402487
1403	-0.00212806	-0.0026477	-0.00295322	-0.00471943		1503	-0.00173279	-0.00222666	-0.00238635	-0.0040191
1404	-0.00212272	-0.00264354	-0.00294811	-0.0047119		1504	-0.00172837	-0.0022233	-0.00238007	-0.00401222
1405	-0.00211853	-0.00263922	-0.00294113	-0.00470438		1505	-0.00172395	-0.00221897	-0.00237658	-0.00400605
1406	-0.00211411	-0.00263513	-0.00293532	-0.00469661		1506	-0.00171837	-0.00221593	-0.00237124	-0.00399965
1407	-0.00211063	-0.00263073	-0.00292811	-0.00468941		1507	-0.00171465	-0.00221185	-0.00236752	-0.00399333
1408	-0.00210597	-0.00262737	-0.00292206	-0.00468236		1508	-0.00170977	-0.00220881	-0.00236287	-0.00398676
1409	-0.00210086	-0.00262273	-0.00291555	-0.00467572		1509	-0.00170535	-0.00220465	-0.00235938	-0.00398012
1410	-0.00209644	-0.00261928	-0.00290881	-0.00466788		1510	-0.00170186	-0.00220104	-0.00235357	-0.0039738
1411	-0.00209249	-0.00261456	-0.002903	-0.00466067		1511	-0.00169675	-0.00219752	-0.00235147	-0.00396699
1412	-0.00208714	-0.00261128	-0.00289556	-0.00465323		1512	-0.0016928	-0.00219344	-0.00234729	-0.00396091
1413	-0.00208319	-0.0026072	-0.00288951	-0.00464554		1513	-0.00168815	-0.00219032	-0.00234403	-0.00395419
1414	-0.002079	-0.00260351	-0.00288184	-0.00463858		1514	-0.00168489	-0.00218576	-0.00234054	-0.0039481
1415	-0.00207435	-0.00259935	-0.00287603	-0.00463122		1515	-0.00168071	-0.00218247	-0.00233729	-0.00394098
1416	-0.00207133	-0.00259655	-0.00286859	-0.00462401		1516	-0.00167722	-0.00217751	-0.0023338	-0.00393505
1417	-0.00206668	-0.00259183	-0.00286324	-0.00461673		1517	-0.00167373	-0.00217399	-0.00232985	-0.00392817
1418	-0.00206435	-0.00258823	-0.0028558	-0.00460944		1518	-0.00167094	-0.00216927	-0.00232752	-0.00392241
1419	-0.00205878	-0.00258374	-0.00285022	-0.00460248		1519	-0.00166838	-0.00216502	-0.00232334	-0.00391544
1420	-0.00205691	-0.00258006	-0.00284347	-0.00459551		1520	-0.0016649	-0.0021607	-0.00232101	-0.00390888
1421	-0.0020525	-0.00257558	-0.0028365	-0.00458887		1521	-0.00166211	-0.00215614	-0.00231567	-0.00390216
1422	-0.00204947	-0.00257062	-0.00283022	-0.00458215		1522	-0.00165769	-0.00215109	-0.00231218	-0.00389535
1423	-0.00204552	-0.00256685	-0.00282534	-0.00457534		1523	-0.00165536	-0.00214701	-0.0023073	-0.00388839
1424	-0.00204273	-0.00256237	-0.00282069	-0.00456838		1524	-0.00165118	-0.00214229	-0.00230427	-0.00388182
1425	-0.00203831	-0.00255893	-0.00281418	-0.00456117		1525	-0.00164862	-0.00213781	-0.00229916	-0.00387446
1426	-0.00203436	-0.00255325	-0.00280929	-0.00455437		1526	-0.00164536	-0.00213284	-0.00229567	-0.00386766
1427	-0.00203041	-0.00254892	-0.00280348	-0.00454741		1527	-0.0016435	-0.0021286	-0.00229055	-0.00386029
1428	-0.00202599	-0.00254364	-0.00279976	-0.00454109		1528	-0.00164025	-0.00212436	-0.0022873	-0.00385317
1429	-0.0020232	-0.00253964	-0.00279325	-0.0045334		1529	-0.00163769	-0.00212012	-0.00228242	-0.003847
1430	-0.00201762	-0.00253516	-0.00279069	-0.00452716		1530	-0.0016335	-0.00211588	-0.00227893	-0.00383972
1431	-0.0020146	-0.00253115	-0.00278442	-0.00452003		1531	-0.00163141	-0.00211131	-0.00227451	-0.00383364
1432	-0.00200995	-0.00252659	-0.00278116	-0.00451323		1532	-0.00162886	-0.00210739	-0.00226986	-0.00382651
1433	-0.00200599	-0.00252227	-0.00277488	-0.00450602		1533	-0.0016256	-0.00210219	-0.00226684	-0.00381923
1434	-0.00200065	-0.00251715	-0.00277093	-0.00449914		1534	-0.00162281	-0.00209866	-0.00226149	-0.00381258
1435	-0.00199739	-0.00251346	-0.00276442	-0.00449258		1535	-0.00161862	-0.0020945	-0.00225847	-0.00380562
1436	-0.00199251	-0.0025089	-0.00275977	-0.00448521		1536	-0.0016156	-0.00209098	-0.00225289	-0.00379842
1437	-0.00198879	-0.00250562	-0.00275372	-0.00447817		1537	-0.00161142	-0.00208674	-0.0022494	-0.00379193
1438	-0.0019839	-0.00250194	-0.00274907	-0.0044708		1538	-0.00160909	-0.00208338	-0.00224405	-0.00378529
1439	-0.00198042	-0.00249777	-0.00274256	-0.00446376		1539	-0.00160514	-0.00207889	-0.00224173	-0.00377808
1440	-0.00197646	-0.00249441	-0.00273559	-0.00445647		1540	-0.00160235	-0.00207569	-0.00223661	-0.00377144
1441	-0.00197274	-0.00249001	-0.00272931	-0.00444943		1541	-0.00159863	-0.00207153	-0.00223359	-0.00376448
1442	-0.00196902	-0.00248681	-0.00272187	-0.00444207		1542	-0.00159584	-0.00206865	-0.00222801	-0.00375807
1443	-0.00196507	-0.00248241	-0.00271699	-0.00443582		1543	-0.00159165	-0.00206497	-0.00222452	-0.00375071
1444	-0.00196112	-0.00247952	-0.00270908	-0.00442878		1544	-0.0015877	-0.0020616	-0.00221917	-0.00374399
1445	-0.00195693	-0.00247512	-0.0027042	-0.00442213		1545	-0.00158514	-0.00205808	-0.00221499	-0.00373694
1446	-0.00195275	-0.00247184	-0.00269652	-0.00441525		1546	-0.00158189	-0.00205456	-0.0022108	-0.00373022
1447	-0.00194787	-0.00246784	-0.00269094	-0.00440837		1547	-0.00157863	-0.00205152	-0.00220638	-0.00372301
1448	-0.00194484	-0.00246407	-0.00268304	-0.00440164		1548	-0.00157491	-0.00204791	-0.00220289	-0.00371613
1449	-0.00194042	-0.00245935	-0.00267723	-0.00439524		1549	-0.00157166	-0.00204495	-0.00219732	-0.00370924
1450	-0.00193764	-0.00245583	-0.00267048	-0.0043894		1550	-0.00156701	-0.00204119	-0.00219406	-0.00370244
1451	-0.00193298	-0.00245135	-0.0026642	-0.00438235		1551	-0.00156259	-0.00203815	-0.00218778	-0.00369508
1452	-0.00192787	-0.00244799	-0.00265816	-0.00437635		1552	-0.00155817	-0.00203335	-0.00218429	-0.00368851
1453	-0.00192461	-0.00244342	-0.00265188	-0.00436954		1553	-0.00155468	-0.00203127	-0.00217895	-0.00368091
1454	-0.00192136	-0.00243926	-0.0026456	-0.0043637		1554	-0.0015505	-0.00202726	-0.00217546	-0.00367386
1455	-0.00191764	-0.0024359	-0.00263886	-0.00435682		1555	-0.00154678	-0.0020239	-0.00216965	-0.00366714
1456	-0.00191438	-0.00243134	-0.00263258	-0.00435081		1556	-0.00154166	-0.00202038	-0.00216616	-0.00365986
1457	-0.00190997	-0.00242773	-0.00262584	-0.00434361		1557	-0.00153724	-0.00201734	-0.0021622	-0.00365305
1458	-0.00190578	-0.00242381	-0.00262026	-0.00433745		1558	-0.00153259	-0.00201397	-0.00215779	-0.00364625
1459	-0.00190206	-0.00242093	-0.00261259	-0.0043304		1559	-0.00152887	-0.00201045	-0.00215267	-0.00363944
1460	-0.0018988	-0.00241693	-0.00260724	-0.00432432		1560	-0.00152422	-0.00200773	-0.00214872	-0.00363176
1461	-0.00189671	-0.00241365	-0.0026005	-0.00431767		1561	-0.00152097	-0.00200389	-0.00214314	-0.00362536
1462	-0.00189299	-0.00240988	-0.00259654	-0.00431079		1562	-0.00151632	-0.00200133	-0.00213779	-0.00361847
1463	-0.00188881	-0.00240644	-0.00258957	-0.00430391		1563	-0.0015133	-0.00199741	-0.00213407	-0.00361183
1464	-0.00188416	-0.00240244	-0.00258445	-0.00429694		1564	-0.00150865	-0.00199501	-0.00212826	-0.00360534
1465	-0.00188183	-0.00239932	-0.00257841	-0.00429054		1565	-0.00150423	-0.00199156	-0.00212407	-0.00359806
1466	-0.00187765	-0.00239539	-0.00257236	-0.00428326		1566	-0.00150051	-0.00198932	-0.00211826	-0.0035907
1467	-0.00187509	-0.00239155	-0.00256794	-0.00427701		1567	-0.00149586	-0.00198548	-0.00211245	-0.00358413
1468	-0.00187113	-0.00238811	-0.00256306	-0.00426997		1568	-0.00149307	-0.00198236	-0.0021064	-0.00357741
1469	-0.00186858	-0.00238387	-0.00255818	-0.00426332		1569	-0.00148888	-0.00197852	-0.00210198	-0.0035706
1470	-0.00186393	-0.00238027	-0.0025519	-0.00425532		1570	-0.00148539	-0.00197507	-0.00209594	-0.00356388
1471	-0.0018609	-0.00237586	-0.00254725	-0.00424835		1571	-0.00148028	-0.00197147	-0.00209129	-0.00355708
1472	-0.00185672	-0.00237202	-0.00254074	-0.00424043		1572	-0.00147679	-0.00196827	-0.00208408	-0.00354995
1473	-0.00185323	-0.00236706	-0.00253655	-0.00423331		1573	-0.00147284	-0.00196491	-0.00207896	-0.00354299
1474	-0.00184905	-0.00236354	-0.00253004	-0.00422546		1574	-0.00146912	-0.00196099	-0.00207222	-0.00353651
1475	-0.00184463	-0.00235873	-0.00252679	-0.00421754		1575	-0.0014654	-0.0019569	-0.00206711	-0.0035297
1476	-0.001843	-0.00235481	-0.00251912	-0.00420953		1576	-0.00146237	-0.0019529	-0.00206176	-0.00352338
1477	-0.00183905	-0.00234977	-0.00251609	-0.00420177		1577	-0.00145982	-0.00194962	-0.00205664	-0.00351649
1478	-0.00183603	-0.00234561	-0.00250889	-0.004194		1578	-0.00145656	-0.00194554	-0.00205106	-0.00350985
1479	-0.00183161	-0.00234016	-0.0025054	-0.00418672		1579	-0.00145261	-0.0019425	-0.00204409	-0.00350329
1480	-0.00182882	-0.00233568	-0.00249842	-0.00417888		1580	-0.00144912	-0.00193889	-0.00203897	-0.00349704
1481	-0.00182556	-0.00233112	-0.002494	-0.00417183		1581	-0.0014461	-0.00193553	-0.002032	-0.00349064
1482	-0.00182184	-0.00232664	-0.00248842	-0.00416391		1582	-0.00144261	-0.00193161	-0.00202874	-0.0034852
1483	-0.00181859	-0.00232191	-0.00248494	-0.00415646		1583	-0.00144075	-0.00192849	-0.00202223	-0.00347879
1484	-0.00181487	-0.00231687	-0.00247959	-0.00414982		1584	-0.00143587	-0.0019244	-0.00201898	-0.00347303
1485	-0.00181138	-0.00231223	-0.00247354	-0.00414301		1585	-0.00143401	-0.00192152	-0.002012	-0.00346694
1486	-0.00180673	-0.00230662	-0.00246819	-0.00413597		1586	-0.00142936	-0.00191736	-0.00200875	-0.00346054
1487	-0.00180347	-0.00230182	-0.00246285	-0.00412885		1587	-0.00142726	-0.00191488	-0.00200363	-0.0034547
1488	-0.00179929	-0.0022975	-0.00245936	-0.00412172		1588	-0.00142378	-0.00191056	-0.00199991	-0.00344821
1489	-0.0017958	-0.00229334	-0.00245331	-0.00411436		1589	-0.00142075	-0.00190687	-0.00199456	-0.00344269
1490	-0.00179092	-0.00228781	-0.00245006	-0.00410795		1590	-0.0014175	-0.00190327	-0.00198991	-0.00343661
1491	-0.00178813	-0.00228357	-0.00244332	-0.00410123		1591	-0.00141564	-0.00189983	-0.00198503	-0.003431
1492	-0.00178371	-0.00227837	-0.0024382	-0.00409379		1592	-0.00141192	-0.00189719	-0.00197991	-0.00342444
1493	-0.00177952	-0.0022738	-0.00243332	-0.00408682		1593	-0.0014089	-0.00189303	-0.00197619	-0.0034186
1494	-0.00177394	-0.00226876	-0.00242867	-0.0040793		1594	-0.00140541	-0.00189006	-0.00197224	-0.00341235
1495	-0.00176953	-0.0022646	-0.00242355	-0.00407273		1595	-0.00140238	-0.0018859	-0.00196898	-0.00340691
1496	-0.00176464	-0.00225924	-0.0024203	-0.00406545		1596	-0.00140006	-0.0018835	-0.00196271	-0.00340067
1497	-0.00176139	-0.00225476	-0.00241379	-0.00405848		1597	-0.00139587	-0.00187918	-0.00195992	-0.00339546
1498	-0.00175697	-0.00225003	-0.00240914	-0.00405136		1598	-0.00139262	-0.00187654	-0.00195434	-0.00338986
1499	-0.00175186	-0.00224491	-0.00240449	-0.00404512		1599	-0.00138936	-0.00187205	-0.00195108	-0.00338418
1500	-0.00174604	-0.00224043	-0.00239914	-0.00403791		1600	-0.00138634	-0.00186941	-0.00194643	-0.00337865
1501	-0.00174232	-0.00223554	-0.00239565	-0.00403143		1601	-0.00138076	-0.00186501	-0.00194341	-0.00337305
1502	-0.00173674	-0.00223146	-0.0023903	-0.00402487		1602	-0.00137844	-0.00186133	-0.00193806	-0.00336777
1503	-0.00173279	-0.00222666	-0.00238635	-0.0040191		1603	-0.00137402	-0.00185732	-0.00193457	-0.00336176
1504	-0.00172837	-0.0022233	-0.00238007	-0.00401222		1604	-0.00137169	-0.00185348	-0.00193062	-0.00335592
1505	-0.00172395	-0.00221897	-0.00237658	-0.00400605		1605	-0.00136728	-0.00184956	-0.00192597	-0.00334968
1506	-0.00171837	-0.00221593	-0.00237124	-0.00399965		1606	-0.00136448	-0.00184596	-0.00192271	-0.00334375
1507	-0.00171465	-0.00221185	-0.00236752	-0.00399333		1607	-0.001361	-0.00184276	-0.00191807	-0.00333719
1508	-0.00170977	-0.00220881	-0.00236287	-0.00398676		1608	-0.00135774	-0.00183819	-0.00191434	-0.00333159
1509	-0.00170535	-0.00220465	-0.00235938	-0.00398012		1609	-0.00135472	-0.00183483	-0.0019083	-0.00332462
1510	-0.00170186	-0.00220104	-0.00235357	-0.0039738		1610	-0.00135077	-0.00183091	-0.00190551	-0.00331894
1511	-0.00169675	-0.00219752	-0.00235147	-0.00396699		1611	-0.00134751	-0.00182827	-0.00189993	-0.00331206
1512	-0.0016928	-0.00219344	-0.00234729	-0.00396091		1612	-0.00134449	-0.00182491	-0.00189737	-0.00330629
1513	-0.00168815	-0.00219032	-0.00234403	-0.00395419		1613	-0.0013417	-0.00182251	-0.00189133	-0.00329989
1514	-0.00168489	-0.00218576	-0.00234054	-0.0039481		1614	-0.00133775	-0.00181882	-0.00188807	-0.00329372
1515	-0.00168071	-0.00218247	-0.00233729	-0.00394098		1615	-0.00133589	-0.00181618	-0.00188179	-0.00328716
1516	-0.00167722	-0.00217751	-0.0023338	-0.00393505		1616	-0.00133193	-0.00181242	-0.00187831	-0.0032806
1517	-0.00167373	-0.00217399	-0.00232985	-0.00392817		1617	-0.00132868	-0.00180914	-0.00187342	-0.00327444
1518	-0.00167094	-0.00216927	-0.00232752	-0.00392241		1618	-0.00132472	-0.00180618	-0.0018711	-0.00326819
1519	-0.00166838	-0.00216502	-0.00232334	-0.00391544		1619	-0.00132263	-0.00180345	-0.00186598	-0.00326227
1520	-0.0016649	-0.0021607	-0.00232101	-0.00390888		1620	-0.00131868	-0.00180057	-0.00186133	-0.0032561
1521	-0.00166211	-0.00215614	-0.00231567	-0.00390216		1621	-0.00131682	-0.00179737	-0.00185645	-0.00324978
1522	-0.00165769	-0.00215109	-0.00231218	-0.00389535		1622	-0.00131333	-0.00179465	-0.0018511	-0.00324305
1523	-0.00165536	-0.00214701	-0.0023073	-0.00388839		1623	-0.00131031	-0.00179097	-0.00184854	-0.00323737
1524	-0.00165118	-0.00214229	-0.00230427	-0.00388182		1624	-0.00130798	-0.00178816	-0.0018425	-0.00323121
1525	-0.00164862	-0.00213781	-0.00229916	-0.00387446		1625	-0.0013045	-0.00178496	-0.00183901	-0.00322577
1526	-0.00164536	-0.00213284	-0.00229567	-0.00386766		1626	-0.00130171	-0.0017824	-0.0018332	-0.00321888
1527	-0.0016435	-0.0021286	-0.00229055	-0.00386029		1627	-0.00129892	-0.00177856	-0.00182994	-0.0032124
1528	-0.00164025	-0.00212436	-0.0022873	-0.00385317		1628	-0.00129636	-0.00177528	-0.0018239	-0.00320592
1529	-0.00163769	-0.00212012	-0.00228242	-0.003847		1629	-0.0012938	-0.00177152	-0.00182204	-0.00319967
1530	-0.0016335	-0.00211588	-0.00227893	-0.00383972		1630	-0.00129148	-0.00176799	-0.00181622	-0.00319343
1531	-0.00163141	-0.00211131	-0.00227451	-0.00383364		1631	-0.00128776	-0.00176367	-0.0018139	-0.00318718
1532	-0.00162886	-0.00210739	-0.00226986	-0.00382651		1632	-0.0012852	-0.00176039	-0.00180855	-0.00318102
1533	-0.0016256	-0.00210219	-0.00226684	-0.00381923		1633	-0.00128125	-0.00175671	-0.0018046	-0.00317478
1534	-0.00162281	-0.00209866	-0.00226149	-0.00381258		1634	-0.00128008	-0.00175343	-0.00179995	-0.00316893
1535	-0.00161862	-0.0020945	-0.00225847	-0.00380562		1635	-0.00127636	-0.00174982	-0.00179576	-0.00316253
1536	-0.0016156	-0.00209098	-0.00225289	-0.00379842		1636	-0.0012745	-0.00174566	-0.00179181	-0.00315757
1537	-0.00161142	-0.00208674	-0.0022494	-0.00379193		1637	-0.00127101	-0.00174182	-0.00178762	-0.00315236
1538	-0.00160909	-0.00208338	-0.00224405	-0.00378529		1638	-0.00126846	-0.00173782	-0.00178414	-0.00314708
1539	-0.00160514	-0.00207889	-0.00224173	-0.00377808		1639	-0.00126636	-0.00173437	-0.00177902	-0.00314204
1540	-0.00160235	-0.00207569	-0.00223661	-0.00377144		1640	-0.00126218	-0.00173061	-0.001776	-0.00313708
1541	-0.00159863	-0.00207153	-0.00223359	-0.00376448		1641	-0.00125916	-0.00172717	-0.00177065	-0.00313203
1542	-0.00159584	-0.00206865	-0.00222801	-0.00375807		1642	-0.00125544	-0.00172277	-0.00176833	-0.00312651
1543	-0.00159165	-0.00206497	-0.00222452	-0.00375071		1643	-0.00125334	-0.00171916	-0.00176298	-0.00312139
1544	-0.0015877	-0.0020616	-0.00221917	-0.00374399		1644	-0.00124869	-0.00171492	-0.00176019	-0.00311634
1545	-0.00158514	-0.00205808	-0.00221499	-0.00373694		1645	-0.00124613	-0.00171172	-0.00175461	-0.00311074
1546	-0.00158189	-0.00205456	-0.0022108	-0.00373022		1646	-0.00124195	-0.00170804	-0.00175112	-0.00310578
1547	-0.00157863	-0.00205152	-0.00220638	-0.00372301		1647	-0.00124055	-0.00170468	-0.00174717	-0.00310009
1548	-0.00157491	-0.00204791	-0.00220289	-0.00371613		1648	-0.00123521	-0.00170075	-0.00174275	-0.00309385
1549	-0.00157166	-0.00204495	-0.00219732	-0.00370924		1649	-0.00123288	-0.00169699	-0.0017381	-0.00308889
1550	-0.00156701	-0.00204119	-0.00219406	-0.00370244		1650	-0.00122986	-0.00169419	-0.00173461	-0.00308248
1551	-0.00156259	-0.00203815	-0.00218778	-0.00369508		1651	-0.0012266	-0.00169003	-0.00173066	-0.00307736
1552	-0.00155817	-0.00203335	-0.00218429	-0.00368851		1652	-0.00122335	-0.00168699	-0.00172601	-0.00307168
1553	-0.00155468	-0.00203127	-0.00217895	-0.00368091		1653	-0.00122033	-0.00168315	-0.00172275	-0.00306632
1554	-0.0015505	-0.00202726	-0.00217546	-0.00367386		1654	-0.00121684	-0.00167962	-0.00171834	-0.00306063
1555	-0.00154678	-0.0020239	-0.00216965	-0.00366714		1655	-0.00121382	-0.00167562	-0.00171554	-0.00305511
1556	-0.00154166	-0.00202038	-0.00216616	-0.00365986		1656	-0.00121079	-0.00167258	-0.00170996	-0.00304943
1557	-0.00153724	-0.00201734	-0.0021622	-0.00365305		1657	-0.00120824	-0.0016681	-0.00170787	-0.00304374
1558	-0.00153259	-0.00201397	-0.00215779	-0.00364625		1658	-0.00120498	-0.00166433	-0.00170322	-0.0030387
1559	-0.00152887	-0.00201045	-0.00215267	-0.00363944		1659	-0.00120196	-0.00166033	-0.00170206	-0.00303366
1560	-0.00152422	-0.00200773	-0.00214872	-0.00363176		1660	-0.00119963	-0.00165625	-0.00169764	-0.00302773
1561	-0.00152097	-0.00200389	-0.00214314	-0.00362536		1661	-0.00119684	-0.00165177	-0.00169601	-0.00302221
1562	-0.00151632	-0.00200133	-0.00213779	-0.00361847		1662	-0.00119475	-0.001648	-0.00169183	-0.00301701
1563	-0.0015133	-0.00199741	-0.00213407	-0.00361183		1663	-0.00119126	-0.00164408	-0.00168927	-0.00301132
1564	-0.00150865	-0.00199501	-0.00212826	-0.00360534		1664	-0.00118987	-0.00164024	-0.00168601	-0.0030062
1565	-0.00150423	-0.00199156	-0.00212407	-0.00359806		1665	-0.00118684	-0.00163624	-0.00168299	-0.00300012
1566	-0.00150051	-0.00198932	-0.00211826	-0.0035907		1666	-0.00118475	-0.0016324	-0.00168044	-0.00299507
1567	-0.00149586	-0.00198548	-0.00211245	-0.00358413		1667	-0.00118243	-0.00162839	-0.00167764	-0.00298955
1568	-0.00149307	-0.00198236	-0.0021064	-0.00357741		1668	-0.00117964	-0.00162471	-0.00167462	-0.00298459
1569	-0.00148888	-0.00197852	-0.00210198	-0.0035706		1669	-0.00117708	-0.00162143	-0.0016702	-0.0029781
1570	-0.00148539	-0.00197507	-0.00209594	-0.00356388		1670	-0.00117382	-0.00161695	-0.00166834	-0.0029725
1571	-0.00148028	-0.00197147	-0.00209129	-0.00355708		1671	-0.00117103	-0.00161414	-0.00166393	-0.0029661
1572	-0.00147679	-0.00196827	-0.00208408	-0.00354995		1672	-0.00116708	-0.0016103	-0.00166137	-0.00296041
1573	-0.00147284	-0.00196491	-0.00207896	-0.00354299		1673	-0.00116522	-0.00160638	-0.00165858	-0.00295481
1574	-0.00146912	-0.00196099	-0.00207222	-0.00353651		1674	-0.0011608	-0.00160174	-0.00165532	-0.00294873
1575	-0.0014654	-0.0019569	-0.00206711	-0.0035297		1675	-0.00115848	-0.00159854	-0.00165114	-0.00294288
1576	-0.00146237	-0.0019529	-0.00206176	-0.00352338		1676	-0.00115429	-0.00159405	-0.00164765	-0.00293648
1577	-0.00145982	-0.00194962	-0.00205664	-0.00351649		1677	-0.00115104	-0.00159021	-0.00164277	-0.0029312
1578	-0.00145656	-0.00194554	-0.00205106	-0.00350985		1678	-0.00114662	-0.00158597	-0.00164091	-0.00292495
1579	-0.00145261	-0.0019425	-0.00204409	-0.00350329		1679	-0.00114476	-0.00158181	-0.00163672	-0.00291959
1580	-0.00144912	-0.00193889	-0.00203897	-0.00349704		1680	-0.00114081	-0.0015778	-0.00163509	-0.00291351
1581	-0.0014461	-0.00193553	-0.002032	-0.00349064		1681	-0.00113592	-0.0015734	-0.00163068	-0.0029079
1582	-0.00144261	-0.00193161	-0.00202874	-0.0034852		1682	-0.00113313	-0.0015694	-0.00162649	-0.00290198
1583	-0.00144075	-0.00192849	-0.00202223	-0.00347879		1683	-0.00112965	-0.00156468	-0.00162417	-0.00289654
1584	-0.00143587	-0.0019244	-0.00201898	-0.00347303		1684	-0.00112639	-0.00156148	-0.00162045	-0.00289061
1585	-0.00143401	-0.00192152	-0.002012	-0.00346694		1685	-0.0011229	-0.00155747	-0.00161882	-0.00288501
1586	-0.00142936	-0.00191736	-0.00200875	-0.00346054		1686	-0.00111988	-0.00155443	-0.00161556	-0.00287917
1587	-0.00142726	-0.00191488	-0.00200363	-0.0034547		1687	-0.00111616	-0.00155027	-0.0016144	-0.00287372
1588	-0.00142378	-0.00191056	-0.00199991	-0.00344821		1688	-0.00111337	-0.00154723	-0.00160975	-0.00286804
1589	-0.00142075	-0.00190687	-0.00199456	-0.00344269		1689	-0.00110849	-0.00154306	-0.00160812	-0.00286292
1590	-0.0014175	-0.00190327	-0.00198991	-0.00343661		1690	-0.00110639	-0.00154026	-0.0016037	-0.00285675
1591	-0.00141564	-0.00189983	-0.00198503	-0.003431		1691	-0.00110151	-0.00153658	-0.00160301	-0.00285099
1592	-0.00141192	-0.00189719	-0.00197991	-0.00342444		1692	-0.00109826	-0.00153362	-0.00159882	-0.00284539
1593	-0.0014089	-0.00189303	-0.00197619	-0.0034186		1693	-0.00109407	-0.00152994	-0.0015965	-0.00284002
1594	-0.00140541	-0.00189006	-0.00197224	-0.00341235		1694	-0.00109175	-0.00152649	-0.00159208	-0.00283426
1595	-0.00140238	-0.0018859	-0.00196898	-0.00340691		1695	-0.00108826	-0.00152329	-0.00158836	-0.00282858
1596	-0.00140006	-0.0018835	-0.00196271	-0.00340067		1696	-0.001085	-0.00152009	-0.0015858	-0.00282361
1597	-0.00139587	-0.00187918	-0.00195992	-0.00339546		1697	-0.00108128	-0.00151753	-0.00158371	-0.00281785
1598	-0.00139262	-0.00187654	-0.00195434	-0.00338986		1698	-0.00107849	-0.00151377	-0.00158138	-0.00281257
1599	-0.00138936	-0.00187205	-0.00195108	-0.00338418		1699	-0.00107617	-0.00151105	-0.00157859	-0.00280737
1600	-0.00138634	-0.00186941	-0.00194643	-0.00337865		1700	-0.00107338	-0.00150696	-0.0015765	-0.0028028
1601	-0.00138076	-0.00186501	-0.00194341	-0.00337305		1701	-0.00107105	-0.00150416	-0.00157348	-0.00279712
1602	-0.00137844	-0.00186133	-0.00193806	-0.00336777		1702	-0.00106756	-0.00150032	-0.00157185	-0.00279272
1603	-0.00137402	-0.00185732	-0.00193457	-0.00336176		1703	-0.00106594	-0.00149784	-0.00156999	-0.00278727
1604	-0.00137169	-0.00185348	-0.00193062	-0.00335592		1704	-0.00106175	-0.00149416	-0.0015686	-0.00278183
1605	-0.00136728	-0.00184956	-0.00192597	-0.00334968		1705	-0.00106059	-0.00149159	-0.00156488	-0.00277631
1606	-0.00136448	-0.00184596	-0.00192271	-0.00334375		1706	-0.00105757	-0.00148807	-0.00156278	-0.00277166
1607	-0.001361	-0.00184276	-0.00191807	-0.00333719		1707	-0.00105547	-0.00148535	-0.00155906	-0.00276646
1608	-0.00135774	-0.00183819	-0.00191434	-0.00333159		1708	-0.00105245	-0.00148239	-0.00155767	-0.0027615
1609	-0.00135472	-0.00183483	-0.0019083	-0.00332462		1709	-0.00105013	-0.00147959	-0.00155534	-0.00275742
1610	-0.00135077	-0.00183091	-0.00190551	-0.00331894		1710	-0.00104733	-0.00147719	-0.00155302	-0.00275221
1611	-0.00134751	-0.00182827	-0.00189993	-0.00331206		1711	-0.00104524	-0.0014743	-0.00154999	-0.00274765
1612	-0.00134449	-0.00182491	-0.00189737	-0.00330629		1712	-0.00104315	-0.0014715	-0.00154697	-0.00274269
1613	-0.0013417	-0.00182251	-0.00189133	-0.00329989		1713	-0.00104315	-0.00146902	-0.00154395	-0.00273877
1614	-0.00133775	-0.00181882	-0.00188807	-0.00329372		1714	-0.00104082	-0.00146686	-0.00154023	-0.00273404
1615	-0.00133589	-0.00181618	-0.00188179	-0.00328716		1715	-0.00103803	-0.00146414	-0.00153883	-0.0027298
1616	-0.00133193	-0.00181242	-0.00187831	-0.0032806		1716	-0.00103594	-0.00146222	-0.00153558	-0.00272516
1617	-0.00132868	-0.00180914	-0.00187342	-0.00327444		1717	-0.00103455	-0.00145958	-0.00153372	-0.00272035
1618	-0.00132472	-0.00180618	-0.0018711	-0.00326819		1718	-0.00103338	-0.00145821	-0.00152953	-0.00271515
1619	-0.00132263	-0.00180345	-0.00186598	-0.00326227		1719	-0.00103176	-0.00145517	-0.00152744	-0.00271123
1620	-0.00131868	-0.00180057	-0.00186133	-0.0032561		1720	-0.00103129	-0.00145397	-0.00152325	-0.00270659
1621	-0.00131682	-0.00179737	-0.00185645	-0.00324978		1721	-0.00102873	-0.00145133	-0.00152093	-0.00270235
1622	-0.00131333	-0.00179465	-0.0018511	-0.00324305		1722	-0.00102734	-0.00145037	-0.00151767	-0.00269746
1623	-0.00131031	-0.00179097	-0.00184854	-0.00323737		1723	-0.00102501	-0.00144813	-0.00151558	-0.00269298
1624	-0.00130798	-0.00178816	-0.0018425	-0.00323121		1724	-0.00102292	-0.00144597	-0.00151209	-0.00268818
1625	-0.0013045	-0.00178496	-0.00183901	-0.00322577		1725	-0.00102106	-0.00144381	-0.00150954	-0.00268369
1626	-0.00130171	-0.0017824	-0.0018332	-0.00321888		1726	-0.00101943	-0.00144133	-0.00150582	-0.00267881
1627	-0.00129892	-0.00177856	-0.00182994	-0.0032124		1727	-0.00101664	-0.00143916	-0.0015014	-0.00267361
1628	-0.00129636	-0.00177528	-0.0018239	-0.00320592		1728	-0.00101432	-0.0014362	-0.00149884	-0.00266945
1629	-0.0012938	-0.00177152	-0.00182204	-0.00319967		1729	-0.00101199	-0.0014342	-0.00149559	-0.0026636
1630	-0.00129148	-0.00176799	-0.00181622	-0.00319343		1730	-0.0010092	-0.00142996	-0.00149163	-0.00265928
1631	-0.00128776	-0.00176367	-0.0018139	-0.00318718		1731	-0.00100827	-0.00142756	-0.00148768	-0.0026536
1632	-0.0012852	-0.00176039	-0.00180855	-0.00318102		1732	-0.00100688	-0.00142355	-0.00148559	-0.00264935
1633	-0.00128125	-0.00175671	-0.0018046	-0.00317478		1733	-0.00100525	-0.00142115	-0.0014807	-0.00264431
1634	-0.00128008	-0.00175343	-0.00179995	-0.00316893		1734	-0.00100316	-0.00141691	-0.00147884	-0.00263943
1635	-0.00127636	-0.00174982	-0.00179576	-0.00316253		1735	-0.00100106	-0.00141371	-0.00147466	-0.00263407
1636	-0.0012745	-0.00174566	-0.00179181	-0.00315757		1736	-0.000998507	-0.00141043	-0.0014721	-0.00262894
1637	-0.00127101	-0.00174182	-0.00178762	-0.00315236		1737	-0.00099781	-0.00140667	-0.00146768	-0.00262422
1638	-0.00126846	-0.00173782	-0.00178414	-0.00314708		1738	-0.000995019	-0.00140386	-0.00146513	-0.0026191
1639	-0.00126636	-0.00173437	-0.00177902	-0.00314204		1739	-0.000994089	-0.00140114	-0.00146117	-0.00261429
1640	-0.00126218	-0.00173061	-0.001776	-0.00313708		1740	-0.000992462	-0.00139778	-0.00145769	-0.00260925
1641	-0.00125916	-0.00172717	-0.00177065	-0.00313203		1741	-0.000990136	-0.00139466	-0.00145466	-0.00260493
1642	-0.00125544	-0.00172277	-0.00176833	-0.00312651		1742	-0.000987114	-0.00139186	-0.00145141	-0.00259948
1643	-0.00125334	-0.00171916	-0.00176298	-0.00312139		1743	-0.000985021	-0.00138857	-0.00144815	-0.00259508
1644	-0.00124869	-0.00171492	-0.00176019	-0.00311634		1744	-0.000982696	-0.00138673	-0.0014442	-0.00259068
1645	-0.00124613	-0.00171172	-0.00175461	-0.00311074		1745	-0.000980138	-0.00138393	-0.00144234	-0.00258644
1646	-0.00124195	-0.00170804	-0.00175112	-0.00310578		1746	-0.000978743	-0.00138201	-0.00143839	-0.00258139
1647	-0.00124055	-0.00170468	-0.00174717	-0.00310009		1747	-0.000975953	-0.00137881	-0.00143536	-0.00257715
1648	-0.00123521	-0.00170075	-0.00174275	-0.00309385		1748	-0.000974093	-0.00137705	-0.00143164	-0.00257203
1649	-0.00123288	-0.00169699	-0.0017381	-0.00308889		1749	-0.000970838	-0.00137433	-0.00142885	-0.00256771
1650	-0.00122986	-0.00169419	-0.00173461	-0.00308248		1750	-0.00096828	-0.00137225	-0.00142351	-0.00256338
1651	-0.0012266	-0.00169003	-0.00173066	-0.00307736		1751	-0.000965257	-0.00136976	-0.00142071	-0.00255882
1652	-0.00122335	-0.00168699	-0.00172601	-0.00307168		1752	-0.000963165	-0.00136824	-0.00141793	-0.0025541
1653	-0.00122033	-0.00168315	-0.00172275	-0.00306632		1753	-0.000960142	-0.00136568	-0.0014156	-0.0025489
1654	-0.00121684	-0.00167962	-0.00171834	-0.00306063		1754	-0.000958747	-0.00136288	-0.00141165	-0.00254489
1655	-0.00121382	-0.00167562	-0.00171554	-0.00305511		1755	-0.000954562	-0.00136008	-0.00140862	-0.00253985
1656	-0.00121079	-0.00167258	-0.00170996	-0.00304943		1756	-0.000952934	-0.00135736	-0.00140444	-0.00253569
1657	-0.00120824	-0.0016681	-0.00170787	-0.00304374		1757	-0.000949214	-0.00135496	-0.00140049	-0.00253161
1658	-0.00120498	-0.00166433	-0.00170322	-0.0030387		1758	-0.000948051	-0.00135255	-0.00139677	-0.00252736
1659	-0.00120196	-0.00166033	-0.00170206	-0.00303366		1759	-0.000944099	-0.00135031	-0.00139421	-0.0025224
1660	-0.00119963	-0.00165625	-0.00169764	-0.00302773		1760	-0.000942006	-0.00134711	-0.00139095	-0.00251832
1661	-0.00119684	-0.00165177	-0.00169601	-0.00302221		1761	-0.000938983	-0.00134567	-0.00138607	-0.00251392
1662	-0.00119475	-0.001648	-0.00169183	-0.00301701		1762	-0.000936658	-0.00134239	-0.00138305	-0.00250975
1663	-0.00119126	-0.00164408	-0.00168927	-0.00301132		1763	-0.00093503	-0.00133991	-0.0013791	-0.00250615
1664	-0.00118987	-0.00164024	-0.00168601	-0.0030062		1764	-0.00093131	-0.00133679	-0.001377	-0.00250183
1665	-0.00118684	-0.00163624	-0.00168299	-0.00300012		1765	-0.000929683	-0.0013351	-0.00137212	-0.00249791
1666	-0.00118475	-0.0016324	-0.00168044	-0.00299507		1766	-0.000926195	-0.00133198	-0.00137142	-0.00249366
1667	-0.00118243	-0.00162839	-0.00167764	-0.00298955		1767	-0.0009248	-0.00132918	-0.00136654	-0.00248966
1668	-0.00117964	-0.00162471	-0.00167462	-0.00298459		1768	-0.000920847	-0.00132638	-0.00136491	-0.00248622
1669	-0.00117708	-0.00162143	-0.0016702	-0.0029781		1769	-0.000919685	-0.00132326	-0.00136073	-0.00248318
1670	-0.00117382	-0.00161695	-0.00166834	-0.0029725		1770	-0.000916197	-0.00132038	-0.0013591	-0.00247854
1671	-0.00117103	-0.00161414	-0.00166393	-0.0029661		1771	-0.000915034	-0.00131773	-0.00135561	-0.00247477
1672	-0.00116708	-0.0016103	-0.00166137	-0.00296041		1772	-0.000910849	-0.00131517	-0.00135329	-0.00247077
1673	-0.00116522	-0.00160638	-0.00165858	-0.00295481		1773	-0.000908524	-0.00131317	-0.00135073	-0.00246669
1674	-0.0011608	-0.00160174	-0.00165532	-0.00294873		1774	-0.000906664	-0.00131109	-0.00134771	-0.00246261
1675	-0.00115848	-0.00159854	-0.00165114	-0.00294288		1775	-0.000904339	-0.00130877	-0.00134585	-0.00245924
1676	-0.00115429	-0.00159405	-0.00164765	-0.00293648		1776	-0.000902246	-0.00130717	-0.00134236	-0.00245508
1677	-0.00115104	-0.00159021	-0.00164277	-0.0029312		1777	-0.000899688	-0.00130453	-0.00134143	-0.00245124
1678	-0.00114662	-0.00158597	-0.00164091	-0.00292495		1778	-0.000898526	-0.00130269	-0.0013384	-0.00244636
1679	-0.00114476	-0.00158181	-0.00163672	-0.00291959		1779	-0.000895735	-0.00129988	-0.00133794	-0.00244252
1680	-0.00114081	-0.0015778	-0.00163509	-0.00291351		1780	-0.00089434	-0.00129812	-0.00133399	-0.00243843
1681	-0.00113592	-0.0015734	-0.00163068	-0.0029079		1781	-0.000891085	-0.00129492	-0.00133352	-0.00243443
1682	-0.00113313	-0.0015694	-0.00162649	-0.00290198		1782	-0.00088969	-0.00129212	-0.00133027	-0.00243091
1683	-0.00112965	-0.00156468	-0.00162417	-0.00289654		1783	-0.000886667	-0.00128892	-0.0013298	-0.00242659
1684	-0.00112639	-0.00156148	-0.00162045	-0.00289061		1784	-0.000886202	-0.00128556	-0.00132701	-0.00242274
1685	-0.0011229	-0.00155747	-0.00161882	-0.00288501		1785	-0.000882715	-0.00128187	-0.00132538	-0.00241786
1686	-0.00111988	-0.00155443	-0.00161556	-0.00287917		1786	-0.000881552	-0.00127827	-0.00132329	-0.0024141
1687	-0.00111616	-0.00155027	-0.0016144	-0.00287372		1787	-0.000879459	-0.00127499	-0.00132097	-0.00240986
1688	-0.00111337	-0.00154723	-0.00160975	-0.00286804		1788	-0.000877367	-0.00127067	-0.00131794	-0.00240633
1689	-0.00110849	-0.00154306	-0.00160812	-0.00286292		1789	-0.000874344	-0.00126747	-0.00131562	-0.00240185
1690	-0.00110639	-0.00154026	-0.0016037	-0.00285675		1790	-0.000872716	-0.00126338	-0.00131353	-0.00239753
1691	-0.00110151	-0.00153658	-0.00160301	-0.00285099		1791	-0.000870159	-0.00126026	-0.00131074	-0.00239337
1692	-0.00109826	-0.00153362	-0.00159882	-0.00284539		1792	-0.000867369	-0.00125562	-0.00130888	-0.00238864
1693	-0.00109407	-0.00152994	-0.0015965	-0.00284002		1793	-0.000867369	-0.00125298	-0.00130515	-0.00238456
1694	-0.00109175	-0.00152649	-0.00159208	-0.00283426		1794	-0.000864578	-0.0012493	-0.00130283	-0.00237984
1695	-0.00108826	-0.00152329	-0.00158836	-0.00282858		1795	-0.000863183	-0.00124689	-0.00129958	-0.00237576
1696	-0.001085	-0.00152009	-0.0015858	-0.00282361		1796	-0.000860626	-0.00124273	-0.00129888	-0.00237095
1697	-0.00108128	-0.00151753	-0.00158371	-0.00281785		1797	-0.000859231	-0.00123977	-0.00129562	-0.00236663
1698	-0.00107849	-0.00151377	-0.00158138	-0.00281257		1798	-0.000857138	-0.00123649	-0.00129516	-0.00236167
1699	-0.00107617	-0.00151105	-0.00157859	-0.00280737		1799	-0.000855743	-0.00123345	-0.0012926	-0.00235727
1700	-0.00107338	-0.00150696	-0.0015765	-0.0028028		1800	-0.000853418	-0.00122984	-0.00129097	-0.00235294
1701	-0.00107105	-0.00150416	-0.00157348	-0.00279712		1801	-0.00085179	-0.00122656	-0.00128934	-0.00234894
1702	-0.00106756	-0.00150032	-0.00157185	-0.00279272		1802	-0.000849465	-0.00122368	-0.00128748	-0.00234414
1703	-0.00106594	-0.00149784	-0.00156999	-0.00278727		1803	-0.000848302	-0.00122008	-0.00128609	-0.00234006
1704	-0.00106175	-0.00149416	-0.0015686	-0.00278183		1804	-0.00084621	-0.00121776	-0.00128446	-0.00233565
1705	-0.00106059	-0.00149159	-0.00156488	-0.00277631		1805	-0.000844815	-0.00121408	-0.00128446	-0.00233133
1706	-0.00105757	-0.00148807	-0.00156278	-0.00277166		1806	-0.00084342	-0.00121271	-0.00128214	-0.00232717
1707	-0.00105547	-0.00148535	-0.00155906	-0.00276646		1807	-0.000841559	-0.00120911	-0.00128167	-0.00232277
1708	-0.00105245	-0.00148239	-0.00155767	-0.0027615		1808	-0.000840862	-0.00120719	-0.00127911	-0.00231796
1709	-0.00105013	-0.00147959	-0.00155534	-0.00275742		1809	-0.000838072	-0.00120383	-0.00127865	-0.0023138
1710	-0.00104733	-0.00147719	-0.00155302	-0.00275221		1810	-0.000837142	-0.00120207	-0.00127609	-0.0023094
1711	-0.00104524	-0.0014743	-0.00154999	-0.00274765		1811	-0.000833886	-0.00119911	-0.00127656	-0.00230532
1712	-0.00104315	-0.0014715	-0.00154697	-0.00274269		1812	-0.000832724	-0.00119718	-0.00127423	-0.00230091
1713	-0.00104315	-0.00146902	-0.00154395	-0.00273877		1813	-0.000829934	-0.00119438	-0.0012733	-0.00229683
1714	-0.00104082	-0.00146686	-0.00154023	-0.00273404		1814	-0.000827609	-0.00119158	-0.00127028	-0.00229203
1715	-0.00103803	-0.00146414	-0.00153883	-0.0027298		1815	-0.000825051	-0.00118934	-0.00126842	-0.00228747
1716	-0.00103594	-0.00146222	-0.00153558	-0.00272516		1816	-0.000822958	-0.00118614	-0.00126516	-0.00228338
1717	-0.00103455	-0.00145958	-0.00153372	-0.00272035		1817	-0.000817843	-0.00118438	-0.001264	-0.00227866
1718	-0.00103338	-0.00145821	-0.00152953	-0.00271515		1818	-0.000817378	-0.0011815	-0.00126191	-0.00227474
1719	-0.00103176	-0.00145517	-0.00152744	-0.00271123		1819	-0.000813425	-0.00117885	-0.00125935	-0.0022701
1720	-0.00103129	-0.00145397	-0.00152325	-0.00270659		1820	-0.000810635	-0.00117541	-0.00125726	-0.00226513
1721	-0.00102873	-0.00145133	-0.00152093	-0.00270235		1821	-0.000807612	-0.00117317	-0.00125447	-0.00226001
1722	-0.00102734	-0.00145037	-0.00151767	-0.00269746		1822	-0.000805055	-0.00116965	-0.00125144	-0.00225513
1723	-0.00102501	-0.00144813	-0.00151558	-0.00269298		1823	-0.000802962	-0.00116837	-0.00124772	-0.00225089
1724	-0.00102292	-0.00144597	-0.00151209	-0.00268818		1824	-0.000799707	-0.00116533	-0.00124656	-0.0022468
1725	-0.00102106	-0.00144381	-0.00150954	-0.00268369		1825	-0.000798079	-0.0011634	-0.00124284	-0.002242
1726	-0.00101943	-0.00144133	-0.00150582	-0.00267881		1826	-0.000795522	-0.00116084	-0.00124121	-0.0022376
1727	-0.00101664	-0.00143916	-0.0015014	-0.00267361		1827	-0.000793661	-0.00115892	-0.00123773	-0.00223311
1728	-0.00101432	-0.0014362	-0.00149884	-0.00266945		1828	-0.000790406	-0.00115676	-0.00123563	-0.00222959
1729	-0.00101199	-0.0014342	-0.00149559	-0.0026636		1829	-0.000787616	-0.00115452	-0.00123191	-0.00222551
1730	-0.0010092	-0.00142996	-0.00149163	-0.00265928		1830	-0.000785523	-0.00115324	-0.00122982	-0.00222127
1731	-0.00100827	-0.00142756	-0.00148768	-0.0026536		1831	-0.000784593	-0.00115132	-0.00122656	-0.00221815
1732	-0.00100688	-0.00142355	-0.00148559	-0.00264935		1832	-0.000781803	-0.0011498	-0.00122331	-0.0022139
1733	-0.00100525	-0.00142115	-0.0014807	-0.00264431		1833	-0.000779246	-0.00114748	-0.00122075	-0.00221038
1734	-0.00100316	-0.00141691	-0.00147884	-0.00263943		1834	-0.000777618	-0.00114532	-0.00121726	-0.0022059
1735	-0.00100106	-0.00141371	-0.00147466	-0.00263407		1835	-0.000775758	-0.00114259	-0.00121471	-0.0022027
1736	-0.000998507	-0.00141043	-0.0014721	-0.00262894		1836	-0.0007732	-0.00114067	-0.00121029	-0.0021987
1737	-0.00099781	-0.00140667	-0.00146768	-0.00262422		1837	-0.000771107	-0.00113731	-0.00120866	-0.00219477
1738	-0.000995019	-0.00140386	-0.00146513	-0.0026191		1838	-0.000769247	-0.00113507	-0.00120401	-0.00219029
1739	-0.000994089	-0.00140114	-0.00146117	-0.00261429		1839	-0.000765992	-0.00113115	-0.00120262	-0.00218597
1740	-0.000992462	-0.00139778	-0.00145769	-0.00260925		1840	-0.000765295	-0.00112859	-0.0011989	-0.0021822
1741	-0.000990136	-0.00139466	-0.00145466	-0.00260493		1841	-0.000763434	-0.00112474	-0.00119773	-0.00217764
1742	-0.000987114	-0.00139186	-0.00145141	-0.00259948		1842	-0.000761342	-0.00112234	-0.00119355	-0.00217356
1743	-0.000985021	-0.00138857	-0.00144815	-0.00259508		1843	-0.000758784	-0.0011185	-0.00119192	-0.00216964
1744	-0.000982696	-0.00138673	-0.0014442	-0.00259068		1844	-0.000758319	-0.00111578	-0.00118797	-0.00216555
1745	-0.000980138	-0.00138393	-0.00144234	-0.00258644		1845	-0.000754831	-0.00111266	-0.00118588	-0.00216147
1746	-0.000978743	-0.00138201	-0.00143839	-0.00258139		1846	-0.000754366	-0.00110977	-0.00118216	-0.00215811
1747	-0.000975953	-0.00137881	-0.00143536	-0.00257715		1847	-0.000749949	-0.00110681	-0.00118006	-0.00215435
1748	-0.000974093	-0.00137705	-0.00143164	-0.00257203		1848	-0.000749949	-0.00110385	-0.0011775	-0.00215099
1749	-0.000970838	-0.00137433	-0.00142885	-0.00256771		1849	-0.000746228	-0.00110073	-0.00117379	-0.00214762
1750	-0.00096828	-0.00137225	-0.00142351	-0.00256338		1850	-0.000744601	-0.00109745	-0.0011703	-0.0021449
1751	-0.000965257	-0.00136976	-0.00142071	-0.00255882		1851	-0.000742508	-0.00109529	-0.00116704	-0.0021417
1752	-0.000963165	-0.00136824	-0.00141793	-0.0025541		1852	-0.000739718	-0.00109264	-0.00116472	-0.00213826
1753	-0.000960142	-0.00136568	-0.0014156	-0.0025489		1853	-0.000737625	-0.00109064	-0.001161	-0.0021349
1754	-0.000958747	-0.00136288	-0.00141165	-0.00254489		1854	-0.000735765	-0.00108704	-0.0011596	-0.00213162
1755	-0.000954562	-0.00136008	-0.00140862	-0.00253985		1855	-0.000734138	-0.00108536	-0.00115495	-0.00212833
1756	-0.000952934	-0.00135736	-0.00140444	-0.00253569		1856	-0.000731812	-0.00108216	-0.00115356	-0.00212537
1757	-0.000949214	-0.00135496	-0.00140049	-0.00253161		1857	-0.000729487	-0.00108064	-0.00114844	-0.00212209
1758	-0.000948051	-0.00135255	-0.00139677	-0.00252736		1858	-0.000726232	-0.001078	-0.00114728	-0.00211913
1759	-0.000944099	-0.00135031	-0.00139421	-0.0025224		1859	-0.000724604	-0.00107616	-0.00114332	-0.00211625
1760	-0.000942006	-0.00134711	-0.00139095	-0.00251832		1860	-0.000722279	-0.00107359	-0.001141	-0.00211281
1761	-0.000938983	-0.00134567	-0.00138607	-0.00251392		1861	-0.000721349	-0.00107079	-0.00113728	-0.00211048
1762	-0.000936658	-0.00134239	-0.00138305	-0.00250975		1862	-0.000718792	-0.00106855	-0.00113542	-0.00210696
1763	-0.00093503	-0.00133991	-0.0013791	-0.00250615		1863	-0.000717164	-0.00106655	-0.00113263	-0.00210472
1764	-0.00093131	-0.00133679	-0.001377	-0.00250183		1864	-0.000714839	-0.00106471	-0.00113007	-0.00210104
1765	-0.000929683	-0.0013351	-0.00137212	-0.00249791		1865	-0.000712514	-0.00106199	-0.00112891	-0.00209864
1766	-0.000926195	-0.00133198	-0.00137142	-0.00249366		1866	-0.000711584	-0.00105983	-0.00112542	-0.00209519
1767	-0.0009248	-0.00132918	-0.00136654	-0.00248966		1867	-0.000711119	-0.0010571	-0.00112379	-0.00209207
1768	-0.000920847	-0.00132638	-0.00136491	-0.00248622		1868	-0.000709724	-0.0010555	-0.00112124	-0.00208895
1769	-0.000919685	-0.00132326	-0.00136073	-0.00248318		1869	-0.000708793	-0.00105302	-0.00112054	-0.00208559
1770	-0.000916197	-0.00132038	-0.0013591	-0.00247854		1870	-0.000706701	-0.00105198	-0.00111705	-0.00208223
1771	-0.000915034	-0.00131773	-0.00135561	-0.00247477		1871	-0.000704376	-0.00104982	-0.00111566	-0.00207926
1772	-0.000910849	-0.00131517	-0.00135329	-0.00247077		1872	-0.000703911	-0.00104846	-0.00111217	-0.00207582
1773	-0.000908524	-0.00131317	-0.00135073	-0.00246669		1873	-0.000701818	-0.00104614	-0.001111	-0.00207238
1774	-0.000906664	-0.00131109	-0.00134771	-0.00246261		1874	-0.000700888	-0.0010447	-0.00110682	-0.00206862
1775	-0.000904339	-0.00130877	-0.00134585	-0.00245924		1875	-0.000698098	-0.00104294	-0.00110542	-0.00206486
1776	-0.000902246	-0.00130717	-0.00134236	-0.00245508		1876	-0.000696238	-0.00104134	-0.0011017	-0.00206142
1777	-0.000899688	-0.00130453	-0.00134143	-0.00245124		1877	-0.00069461	-0.00104038	-0.00110008	-0.00205741
1778	-0.000898526	-0.00130269	-0.0013384	-0.00244636		1878	-0.000694145	-0.00103853	-0.00109705	-0.00205501
1779	-0.000895735	-0.00129988	-0.00133794	-0.00244252		1879	-0.000692285	-0.00103749	-0.0010931	-0.00205085
1780	-0.00089434	-0.00129812	-0.00133399	-0.00243843		1880	-0.00069182	-0.00103653	-0.00108961	-0.00204765
1781	-0.000891085	-0.00129492	-0.00133352	-0.00243443		1881	-0.000689495	-0.00103589	-0.00108589	-0.00204324
1782	-0.00088969	-0.00129212	-0.00133027	-0.00243091		1882	-0.000688332	-0.00103493	-0.00108403	-0.00203972
1783	-0.000886667	-0.00128892	-0.0013298	-0.00242659		1883	-0.00068717	-0.00103445	-0.00107985	-0.00203532
1784	-0.000886202	-0.00128556	-0.00132701	-0.00242274		1884	-0.000685542	-0.00103333	-0.00107799	-0.0020314
1785	-0.000882715	-0.00128187	-0.00132538	-0.00241786		1885	-0.000685774	-0.00103253	-0.00107287	-0.00202756
1786	-0.000881552	-0.00127827	-0.00132329	-0.0024141		1886	-0.000684147	-0.00103133	-0.00107148	-0.00202363
1787	-0.000879459	-0.00127499	-0.00132097	-0.00240986		1887	-0.000683449	-0.00103101	-0.00106683	-0.00201931
1788	-0.000877367	-0.00127067	-0.00131794	-0.00240633		1888	-0.000680892	-0.00102941	-0.00106497	-0.00201515
1789	-0.000874344	-0.00126747	-0.00131562	-0.00240185		1889	-0.000681357	-0.00102829	-0.00106078	-0.00201115
1790	-0.000872716	-0.00126338	-0.00131353	-0.00239753		1890	-0.000678799	-0.00102621	-0.00105915	-0.00200746
1791	-0.000870159	-0.00126026	-0.00131074	-0.00239337		1891	-0.000678567	-0.00102477	-0.00105497	-0.00200402
1792	-0.000867369	-0.00125562	-0.00130888	-0.00238864		1892	-0.000677404	-0.00102252	-0.00105311	-0.00199922
1793	-0.000867369	-0.00125298	-0.00130515	-0.00238456		1893	-0.000676009	-0.00102004	-0.00104962	-0.00199634
1794	-0.000864578	-0.0012493	-0.00130283	-0.00237984		1894	-0.000673916	-0.00101844	-0.00104706	-0.00199249
1795	-0.000863183	-0.00124689	-0.00129958	-0.00237576		1895	-0.000672754	-0.0010154	-0.00104544	-0.00198969
1796	-0.000860626	-0.00124273	-0.00129888	-0.00237095		1896	-0.000670894	-0.00101316	-0.00104148	-0.00198633
1797	-0.000859231	-0.00123977	-0.00129562	-0.00236663		1897	-0.000670196	-0.00101068	-0.00103893	-0.00198297
1798	-0.000857138	-0.00123649	-0.00129516	-0.00236167		1898	-0.000668336	-0.00100876	-0.0010359	-0.00197889
1799	-0.000855743	-0.00123345	-0.0012926	-0.00235727		1899	-0.000666941	-0.0010062	-0.00103404	-0.00197593
1800	-0.000853418	-0.00122984	-0.00129097	-0.00235294		1900	-0.000666476	-0.00100451	-0.00103009	-0.00197272
1801	-0.00085179	-0.00122656	-0.00128934	-0.00234894		1901	-0.000663453	-0.00100235	-0.00102893	-0.00196944
1802	-0.000849465	-0.00122368	-0.00128748	-0.00234414		1902	-0.000662291	-0.00100043	-0.00102498	-0.00196552
1803	-0.000848302	-0.00122008	-0.00128609	-0.00234006		1903	-0.000659965	-0.00099779	-0.00102335	-0.00196176
1804	-0.00084621	-0.00121776	-0.00128446	-0.00233565		1904	-0.000659035	-0.000995469	-0.00102009	-0.00195808
1805	-0.000844815	-0.00121408	-0.00128446	-0.00233133		1905	-0.000656245	-0.000992988	-0.00101753	-0.00195463
1806	-0.00084342	-0.00121271	-0.00128214	-0.00232717		1906	-0.00065485	-0.000990986	-0.00101521	-0.00195103
1807	-0.000841559	-0.00120911	-0.00128167	-0.00232277		1907	-0.000651595	-0.000988505	-0.00101172	-0.00194719
1808	-0.000840862	-0.00120719	-0.00127911	-0.00231796		1908	-0.0006502	-0.000986824	-0.00100963	-0.00194415
1809	-0.000838072	-0.00120383	-0.00127865	-0.0023138		1909	-0.000648107	-0.000984422	-0.00100754	-0.00194055
1810	-0.000837142	-0.00120207	-0.00127609	-0.0023094		1910	-0.000646944	-0.000982021	-0.00100614	-0.00193798
1811	-0.000833886	-0.00119911	-0.00127656	-0.00230532		1911	-0.000645084	-0.00097914	-0.00100312	-0.0019343
1812	-0.000832724	-0.00119718	-0.00127423	-0.00230091		1912	-0.000641597	-0.000976818	-0.00100196	-0.00193094
1813	-0.000829934	-0.00119438	-0.0012733	-0.00229683		1913	-0.000640434	-0.000974176	-0.000999166	-0.00192766
1814	-0.000827609	-0.00119158	-0.00127028	-0.00229203		1914	-0.000638341	-0.000971455	-0.000998468	-0.0019247
1815	-0.000825051	-0.00118934	-0.00126842	-0.00228747		1915	-0.000635784	-0.000970094	-0.000994981	-0.00192093
1816	-0.000822958	-0.00118614	-0.00126516	-0.00228338		1916	-0.000632994	-0.000967052	-0.000994748	-0.00191821
1817	-0.000817843	-0.00118438	-0.001264	-0.00227866		1917	-0.000630436	-0.000964811	-0.00099126	-0.00191445
1818	-0.000817378	-0.0011815	-0.00126191	-0.00227474		1918	-0.000628111	-0.000961129	-0.000990563	-0.00191109
1819	-0.000813425	-0.00117885	-0.00125935	-0.0022701		1919	-0.000626251	-0.000959448	-0.00098754	-0.00190789
1820	-0.000810635	-0.00117541	-0.00125726	-0.00226513		1920	-0.000623228	-0.000956647	-0.00098661	-0.0019042
1821	-0.000807612	-0.00117317	-0.00125447	-0.00226001		1921	-0.000621833	-0.000954485	-0.000984285	-0.00190156
1822	-0.000805055	-0.00116965	-0.00125144	-0.00225513		1922	-0.000619043	-0.000952164	-0.00098289	-0.0018978
1823	-0.000802962	-0.00116837	-0.00124772	-0.00225089		1923	-0.000617648	-0.000949602	-0.000981262	-0.00189508
1824	-0.000799707	-0.00116533	-0.00124656	-0.0022468		1924	-0.000615787	-0.000947521	-0.000979402	-0.0018914
1825	-0.000798079	-0.0011634	-0.00124284	-0.002242		1925	-0.000613462	-0.0009444	-0.000978472	-0.00188836
1826	-0.000795522	-0.00116084	-0.00124121	-0.0022376		1926	-0.000612067	-0.000942398	-0.000976147	-0.00188523
1827	-0.000793661	-0.00115892	-0.00123773	-0.00223311		1927	-0.00060951	-0.000939997	-0.000975915	-0.00188243
1828	-0.000790406	-0.00115676	-0.00123563	-0.00222959		1928	-0.000608812	-0.000937516	-0.000973357	-0.00187883
1829	-0.000787616	-0.00115452	-0.00123191	-0.00222551		1929	-0.000607882	-0.000934714	-0.000971962	-0.00187547
1830	-0.000785523	-0.00115324	-0.00122982	-0.00222127		1930	-0.000605789	-0.000932633	-0.000969404	-0.00187219
1831	-0.000784593	-0.00115132	-0.00122656	-0.00221815		1931	-0.000605324	-0.000929031	-0.000968241	-0.00186867
1832	-0.000781803	-0.0011498	-0.00122331	-0.0022139		1932	-0.000603929	-0.00092775	-0.000965219	-0.00186498
1833	-0.000779246	-0.00114748	-0.00122075	-0.00221038		1933	-0.000601837	-0.000925108	-0.000964986	-0.00186202
1834	-0.000777618	-0.00114532	-0.00121726	-0.0022059		1934	-0.000600442	-0.000924388	-0.000962661	-0.0018589
1835	-0.000775758	-0.00114259	-0.00121471	-0.0022027		1935	-0.000598349	-0.000922307	-0.000962429	-0.00185578
1836	-0.0007732	-0.00114067	-0.00121029	-0.0021987		1936	-0.000597186	-0.000920706	-0.000959871	-0.00185297
1837	-0.000771107	-0.00113731	-0.00120866	-0.00219477		1937	-0.000595791	-0.000919105	-0.000958243	-0.00184969
1838	-0.000769247	-0.00113507	-0.00120401	-0.00219029		1938	-0.000595326	-0.000916864	-0.000956151	-0.00184673
1839	-0.000765992	-0.00113115	-0.00120262	-0.00218597		1939	-0.000593234	-0.000915823	-0.000954291	-0.00184409
1840	-0.000765295	-0.00112859	-0.0011989	-0.0021822		1940	-0.000592769	-0.000913902	-0.000953128	-0.00184161
1841	-0.000763434	-0.00112474	-0.00119773	-0.00217764		1941	-0.000590211	-0.000911901	-0.0009515	-0.00183809
1842	-0.000761342	-0.00112234	-0.00119355	-0.00217356		1942	-0.000589281	-0.00090998	-0.000950338	-0.0018356
1843	-0.000758784	-0.0011185	-0.00119192	-0.00216964		1943	-0.000588816	-0.000908299	-0.00094778	-0.00183224
1844	-0.000758319	-0.00111578	-0.00118797	-0.00216555		1944	-0.000587653	-0.000905737	-0.000947083	-0.00182976
1845	-0.000754831	-0.00111266	-0.00118588	-0.00216147		1945	-0.000586491	-0.000904216	-0.00094406	-0.0018268
1846	-0.000754366	-0.00110977	-0.00118216	-0.00215811		1946	-0.00058463	-0.000902135	-0.000943595	-0.0018244
1847	-0.000749949	-0.00110681	-0.00118006	-0.00215435		1947	-0.000584165	-0.000900054	-0.000940805	-0.00182128
1848	-0.000749949	-0.00110385	-0.0011775	-0.00215099		1948	-0.00058184	-0.000896852	-0.000941735	-0.00181896
1849	-0.000746228	-0.00110073	-0.00117379	-0.00214762		1949	-0.000582073	-0.000895251	-0.000938712	-0.00181567
1850	-0.000744601	-0.00109745	-0.0011703	-0.0021449		1950	-0.000580445	-0.000892049	-0.000938014	-0.00181287
1851	-0.000742508	-0.00109529	-0.00116704	-0.0021417		1951	-0.000580213	-0.000890288	-0.000936154	-0.00181063
1852	-0.000739718	-0.00109264	-0.00116472	-0.00213826		1952	-0.000579283	-0.000887807	-0.000934527	-0.00180719
1853	-0.000737625	-0.00109064	-0.001161	-0.0021349		1953	-0.000578818	-0.000884685	-0.000932667	-0.00180495
1854	-0.000735765	-0.00108704	-0.0011596	-0.00213162		1954	-0.000576493	-0.000882364	-0.000931504	-0.00180175
1855	-0.000734138	-0.00108536	-0.00115495	-0.00212833		1955	-0.000576725	-0.000878842	-0.000930574	-0.00179886
1856	-0.000731812	-0.00108216	-0.00115356	-0.00212537		1956	-0.00057533	-0.000876921	-0.000928249	-0.00179526
1857	-0.000729487	-0.00108064	-0.00114844	-0.00212209		1957	-0.000575097	-0.000874599	-0.000927319	-0.00179262
1858	-0.000726232	-0.001078	-0.00114728	-0.00211913		1958	-0.0005744	-0.000872678	-0.000924529	-0.00178982
1859	-0.000724604	-0.00107616	-0.00114332	-0.00211625		1959	-0.000573005	-0.000870197	-0.000923134	-0.00178678
1860	-0.000722279	-0.00107359	-0.001141	-0.00211281		1960	-0.000572075	-0.000868115	-0.000920808	-0.00178414
1861	-0.000721349	-0.00107079	-0.00113728	-0.00211048		1961	-0.000570215	-0.000865474	-0.000919181	-0.00178037
1862	-0.000718792	-0.00106855	-0.00113542	-0.00210696		1962	-0.000569517	-0.000863873	-0.000916623	-0.00177725
1863	-0.000717164	-0.00106655	-0.00113263	-0.00210472		1963	-0.000568587	-0.000861872	-0.000916856	-0.00177413
1864	-0.000714839	-0.00106471	-0.00113007	-0.00210104		1964	-0.000568122	-0.000860671	-0.000913135	-0.00177157
1865	-0.000712514	-0.00106199	-0.00112891	-0.00209864		1965	-0.000566029	-0.00085867	-0.00091267	-0.00176893
1866	-0.000711584	-0.00105983	-0.00112542	-0.00209519		1966	-0.000564169	-0.000856749	-0.00090895	-0.00176669
1867	-0.000711119	-0.0010571	-0.00112379	-0.00209207		1967	-0.000560682	-0.000854748	-0.000909183	-0.00176316
1868	-0.000709724	-0.0010555	-0.00112124	-0.00208895		1968	-0.000560216	-0.000852827	-0.000907323	-0.00176084
1869	-0.000708793	-0.00105302	-0.00112054	-0.00208559		1969	-0.000558124	-0.000851706	-0.000905695	-0.00175676
1870	-0.000706701	-0.00105198	-0.00111705	-0.00208223		1970	-0.000557426	-0.000849945	-0.0009043	-0.00175492
1871	-0.000704376	-0.00104982	-0.00111566	-0.00207926		1971	-0.000555566	-0.000848504	-0.000902672	-0.00175156
1872	-0.000703911	-0.00104846	-0.00111217	-0.00207582		1972	-0.000555101	-0.000846103	-0.00090151	-0.00174988
1873	-0.000701818	-0.00104614	-0.001111	-0.00207238		1973	-0.000552311	-0.000844502	-0.000899417	-0.00174651
1874	-0.000700888	-0.0010447	-0.00110682	-0.00206862		1974	-0.000552078	-0.00084178	-0.00089965	-0.00174371
1875	-0.000698098	-0.00104294	-0.00110542	-0.00206486		1975	-0.000550683	-0.00084042	-0.000897557	-0.00174059
1876	-0.000696238	-0.00104134	-0.0011017	-0.00206142		1976	-0.000548591	-0.000837858	-0.000897789	-0.00173731
1877	-0.00069461	-0.00104038	-0.00110008	-0.00205741		1977	-0.000547428	-0.000836017	-0.000894767	-0.00173475
1878	-0.000694145	-0.00103853	-0.00109705	-0.00205501		1978	-0.00054487	-0.000833776	-0.000893604	-0.00173179
1879	-0.000692285	-0.00103749	-0.0010931	-0.00205085		1979	-0.000543475	-0.000832095	-0.000891046	-0.0017285
1880	-0.00069182	-0.00103653	-0.00108961	-0.00204765		1980	-0.000541383	-0.000829853	-0.000891279	-0.00172522
1881	-0.000689495	-0.00103589	-0.00108589	-0.00204324		1981	-0.000540453	-0.000828413	-0.000888721	-0.00172146
1882	-0.000688332	-0.00103493	-0.00108403	-0.00203972		1982	-0.000537663	-0.000826732	-0.000887791	-0.00171818
1883	-0.00068717	-0.00103445	-0.00107985	-0.00203532		1983	-0.0005365	-0.000824971	-0.000886629	-0.00171514
1884	-0.000685542	-0.00103333	-0.00107799	-0.0020314		1984	-0.000534175	-0.00082353	-0.000885699	-0.00171161
1885	-0.000685774	-0.00103253	-0.00107287	-0.00202756		1985	-0.000533477	-0.000821769	-0.000885466	-0.00170833
1886	-0.000684147	-0.00103133	-0.00107148	-0.00202363		1986	-0.000531152	-0.000820968	-0.000883839	-0.00170489
1887	-0.000683449	-0.00103101	-0.00106683	-0.00201931		1987	-0.000529292	-0.000819368	-0.000883141	-0.00170177
1888	-0.000680892	-0.00102941	-0.00106497	-0.00201515		1988	-0.000527664	-0.000819047	-0.000881513	-0.00169777
1889	-0.000681357	-0.00102829	-0.00106078	-0.00201115		1989	-0.000525572	-0.000817766	-0.000880816	-0.00169472
1890	-0.000678799	-0.00102621	-0.00105915	-0.00200746		1990	-0.000524177	-0.000817526	-0.000878723	-0.00169104
1891	-0.000678567	-0.00102477	-0.00105497	-0.00200402		1991	-0.000522317	-0.000816166	-0.000878723	-0.00168768
1892	-0.000677404	-0.00102252	-0.00105311	-0.00199922		1992	-0.000521852	-0.000815925	-0.000876631	-0.00168432
1893	-0.000676009	-0.00102004	-0.00104962	-0.00199634		1993	-0.000518829	-0.000814164	-0.000876398	-0.00168104
1894	-0.000673916	-0.00101844	-0.00104706	-0.00199249		1994	-0.000517434	-0.000813844	-0.000873608	-0.00167759
1895	-0.000672754	-0.0010154	-0.00104544	-0.00198969		1995	-0.000514411	-0.000812404	-0.00087384	-0.00167415
1896	-0.000670894	-0.00101316	-0.00104148	-0.00198633		1996	-0.000513946	-0.000811203	-0.000872213	-0.00167079
1897	-0.000670196	-0.00101068	-0.00103893	-0.00198297		1997	-0.000511621	-0.000810162	-0.00087198	-0.00166727
1898	-0.000668336	-0.00100876	-0.0010359	-0.00197889		1998	-0.000509063	-0.000808641	-0.000869423	-0.00166439
1899	-0.000666941	-0.0010062	-0.00103404	-0.00197593		1999	-0.00050604	-0.00080728	-0.000868725	-0.0016611
1900	-0.000666476	-0.00100451	-0.00103009	-0.00197272		2000	-0.000504645	-0.000805359	-0.000866632	-0.0016583
1901	-0.000663453	-0.00100235	-0.00102893	-0.00196944		2001	-0.000502088	-0.000804239	-0.000864772	-0.0016547
1902	-0.000662291	-0.00100043	-0.00102498	-0.00196552		2002	-0.000500693	-0.000801597	-0.000862447	-0.00165246
1903	-0.000659965	-0.00099779	-0.00102335	-0.00196176		2003	-0.0004986	-0.000799916	-0.000861517	-0.00164878
1904	-0.000659035	-0.000995469	-0.00102009	-0.00195808		2004	-0.000496972	-0.000796474	-0.000860122	-0.00164558
1905	-0.000656245	-0.000992988	-0.00101753	-0.00195463		2005	-0.000495345	-0.000794953	-0.000857099	-0.00164221
1906	-0.00065485	-0.000990986	-0.00101521	-0.00195103		2006	-0.000493252	-0.000791592	-0.000857099	-0.00163917
1907	-0.000651595	-0.000988505	-0.00101172	-0.00194719		2007	-0.000492322	-0.00078943	-0.000853611	-0.00163589
1908	-0.0006502	-0.000986824	-0.00100963	-0.00194415		2008	-0.000489299	-0.000786068	-0.000853147	-0.00163261
1909	-0.000648107	-0.000984422	-0.00100754	-0.00194055		2009	-0.000488602	-0.000784067	-0.000850124	-0.00162925
1910	-0.000646944	-0.000982021	-0.00100614	-0.00193798		2010	-0.000486509	-0.000781105	-0.000850821	-0.00162564
1911	-0.000645084	-0.00097914	-0.00100312	-0.0019343		2011	-0.000484649	-0.000778624	-0.000847101	-0.001623
1912	-0.000641597	-0.000976818	-0.00100196	-0.00193094		2012	-0.000483022	-0.000775822	-0.000845706	-0.00161988
1913	-0.000640434	-0.000974176	-0.000999166	-0.00192766		2013	-0.000481394	-0.000773581	-0.000842683	-0.00161684
1914	-0.000638341	-0.000971455	-0.000998468	-0.0019247		2014	-0.000479301	-0.00077102	-0.000841986	-0.00161396
1915	-0.000635784	-0.000970094	-0.000994981	-0.00192093		2015	-0.000477441	-0.000768538	-0.000839196	-0.00161092
1916	-0.000632994	-0.000967052	-0.000994748	-0.00191821		2016	-0.000476511	-0.000767498	-0.000837103	-0.00160843
1917	-0.000630436	-0.000964811	-0.00099126	-0.00191445		2017	-0.000475581	-0.000765256	-0.000835708	-0.00160547
1918	-0.000628111	-0.000961129	-0.000990563	-0.00191109		2018	-0.000474651	-0.000763575	-0.000833383	-0.00160299
1919	-0.000626251	-0.000959448	-0.00098754	-0.00190789		2019	-0.000473488	-0.000761094	-0.000831755	-0.00160059
1920	-0.000623228	-0.000956647	-0.00098661	-0.0019042		2020	-0.000473256	-0.000759893	-0.0008285	-0.00159787
1921	-0.000621833	-0.000954485	-0.000984285	-0.00190156		2021	-0.000471396	-0.000757892	-0.000827803	-0.00159531
1922	-0.000619043	-0.000952164	-0.00098289	-0.0018978		2022	-0.000471628	-0.000757092	-0.00082478	-0.00159331
1923	-0.000617648	-0.000949602	-0.000981262	-0.00189508		2023	-0.000470001	-0.000755491	-0.000825012	-0.00159058
1924	-0.000615787	-0.000947521	-0.000979402	-0.0018914		2024	-0.000470466	-0.00075445	-0.000821757	-0.00158786
1925	-0.000613462	-0.0009444	-0.000978472	-0.00188836		2025	-0.000469071	-0.000752209	-0.00082199	-0.00158506
1926	-0.000612067	-0.000942398	-0.000976147	-0.00188523		2026	-0.000469536	-0.000751008	-0.000819432	-0.0015833
1927	-0.00060951	-0.000939997	-0.000975915	-0.00188243		2027	-0.00046721	-0.000749247	-0.000818502	-0.00158058
1928	-0.000608812	-0.000937516	-0.000973357	-0.00187883		2028	-0.000466978	-0.000747566	-0.000816177	-0.0015785
1929	-0.000607882	-0.000934714	-0.000971962	-0.00187547		2029	-0.00046628	-0.000746606	-0.000814549	-0.00157618
1930	-0.000605789	-0.000932633	-0.000969404	-0.00187219		2030	-0.000466048	-0.000745245	-0.000813852	-0.00157353
1931	-0.000605324	-0.000929031	-0.000968241	-0.00186867		2031	-0.000464885	-0.000744124	-0.000811991	-0.00157017
1932	-0.000603929	-0.00092775	-0.000965219	-0.00186498		2032	-0.000464188	-0.000741883	-0.000809899	-0.00156753
1933	-0.000601837	-0.000925108	-0.000964986	-0.00186202		2033	-0.000463723	-0.000741723	-0.000806876	-0.00156425
1934	-0.000600442	-0.000924388	-0.000962661	-0.0018589		2034	-0.000463258	-0.000739962	-0.000805248	-0.00156153
1935	-0.000598349	-0.000922307	-0.000962429	-0.00185578		2035	-0.000462793	-0.000739962	-0.000802923	-0.00155784
1936	-0.000597186	-0.000920706	-0.000959871	-0.00185297		2036	-0.000462793	-0.000738361	-0.000802226	-0.0015552
1937	-0.000595791	-0.000919105	-0.000958243	-0.00184969		2037	-0.000462328	-0.000738201	-0.000799668	-0.0015524
1938	-0.000595326	-0.000916864	-0.000956151	-0.00184673		2038	-0.000461398	-0.00073684	-0.000798273	-0.00154912
1939	-0.000593234	-0.000915823	-0.000954291	-0.00184409		2039	-0.000461165	-0.00073644	-0.00079525	-0.00154664
1940	-0.000592769	-0.000913902	-0.000953128	-0.00184161		2040	-0.00045884	-0.000735559	-0.00079432	-0.00154384
1941	-0.000590211	-0.000911901	-0.0009515	-0.00183809		2041	-0.000458375	-0.000735799	-0.000790833	-0.00154096
1942	-0.000589281	-0.00090998	-0.000950338	-0.0018356		2042	-0.000456515	-0.000735719	-0.000790135	-0.00153823
1943	-0.000588816	-0.000908299	-0.00094778	-0.00183224		2043	-0.000455817	-0.000735479	-0.00078781	-0.00153607
1944	-0.000587653	-0.000905737	-0.000947083	-0.00182976		2044	-0.000453725	-0.000735639	-0.000786182	-0.00153343
1945	-0.000586491	-0.000904216	-0.00094406	-0.0018268		2045	-0.00045233	-0.000734759	-0.000784322	-0.00153151
1946	-0.00058463	-0.000902135	-0.000943595	-0.0018244		2046	-0.000450469	-0.000734358	-0.000781997	-0.00152887
1947	-0.000584165	-0.000900054	-0.000940805	-0.00182128		2047	-0.000449307	-0.000733878	-0.000780369	-0.00152647
1948	-0.00058184	-0.000896852	-0.000941735	-0.00181896		2048	-0.000447912	-0.000733958	-0.000777812	-0.00152391
1949	-0.000582073	-0.000895251	-0.000938712	-0.00181567		2049	-0.000445587	-0.000732678	-0.000777114	-0.00152174
1950	-0.000580445	-0.000892049	-0.000938014	-0.00181287		2050	-0.000445354	-0.000732357	-0.000773394	-0.00151862
1951	-0.000580213	-0.000890288	-0.000936154	-0.00181063		2051	-0.000443261	-0.000730036	-0.000773162	-0.00151686
1952	-0.000579283	-0.000887807	-0.000934527	-0.00180719		2052	-0.000441401	-0.000729315	-0.000768976	-0.00151462
1953	-0.000578818	-0.000884685	-0.000932667	-0.00180495		2053	-0.000438844	-0.000726834	-0.000768046	-0.00151198
1954	-0.000576493	-0.000882364	-0.000931504	-0.00180175		2054	-0.000438611	-0.000726834	-0.000765256	-0.0015099
1955	-0.000576725	-0.000878842	-0.000930574	-0.00179886		2055	-0.000436286	-0.000724513	-0.000764093	-0.00150702
1956	-0.00057533	-0.000876921	-0.000928249	-0.00179526		2056	-0.000436519	-0.000723552	-0.000760606	-0.00150429
1957	-0.000575097	-0.000874599	-0.000927319	-0.00179262		2057	-0.000435356	-0.000721311	-0.000759443	-0.00150181
1958	-0.0005744	-0.000872678	-0.000924529	-0.00178982		2058	-0.000434891	-0.00071899	-0.000757118	-0.00150013
1959	-0.000573005	-0.000870197	-0.000923134	-0.00178678		2059	-0.000432798	-0.000717068	-0.000754793	-0.00149765
1960	-0.000572075	-0.000868115	-0.000920808	-0.00178414		2060	-0.000433263	-0.000714587	-0.000752933	-0.00149605
1961	-0.000570215	-0.000865474	-0.000919181	-0.00178037		2061	-0.000432798	-0.000713387	-0.000750608	-0.00149325
1962	-0.000569517	-0.000863873	-0.000916623	-0.00177725		2062	-0.000431868	-0.000710745	-0.000748282	-0.00149125
1963	-0.000568587	-0.000861872	-0.000916856	-0.00177413		2063	-0.000431171	-0.000708504	-0.00074619	-0.00148869
1964	-0.000568122	-0.000860671	-0.000913135	-0.00177157		2064	-0.000431171	-0.000704981	-0.000744097	-0.001487
1965	-0.000566029	-0.00085867	-0.00091267	-0.00176893		2065	-0.000430241	-0.000703621	-0.000741307	-0.00148468
1966	-0.000564169	-0.000856749	-0.00090895	-0.00176669		2066	-0.000430008	-0.000700819	-0.000739679	-0.00148228
1967	-0.000560682	-0.000854748	-0.000909183	-0.00176316		2067	-0.000430008	-0.000699778	-0.000736657	-0.0014794
1968	-0.000560216	-0.000852827	-0.000907323	-0.00176084		2068	-0.000429078	-0.000696897	-0.000735959	-0.00147724
1969	-0.000558124	-0.000851706	-0.000905695	-0.00175676		2069	-0.000429311	-0.000695216	-0.000733169	-0.001475
1970	-0.000557426	-0.000849945	-0.0009043	-0.00175492		2070	-0.000427915	-0.000692414	-0.000732936	-0.00147228
1971	-0.000555566	-0.000848504	-0.000902672	-0.00175156		2071	-0.000428148	-0.000691614	-0.000730146	-0.00147051
1972	-0.000555101	-0.000846103	-0.00090151	-0.00174988		2072	-0.000425823	-0.000689453	-0.000728286	-0.00146803
1973	-0.000552311	-0.000844502	-0.000899417	-0.00174651		2073	-0.000425358	-0.000688172	-0.000725961	-0.00146635
1974	-0.000552078	-0.00084178	-0.00089965	-0.00174371		2074	-0.000423498	-0.000686971	-0.000724333	-0.00146419
1975	-0.000550683	-0.00084042	-0.000897557	-0.00174059		2075	-0.000423033	-0.00068513	-0.000722938	-0.00146283
1976	-0.000548591	-0.000837858	-0.000897789	-0.00173731		2076	-0.000421173	-0.000683769	-0.000721543	-0.00146019
1977	-0.000547428	-0.000836017	-0.000894767	-0.00173475		2077	-0.000421405	-0.000682409	-0.000718985	-0.00145843
1978	-0.00054487	-0.000833776	-0.000893604	-0.00173179		2078	-0.000419778	-0.000681928	-0.000717823	-0.00145515
1979	-0.000543475	-0.000832095	-0.000891046	-0.0017285		2079	-0.00042001	-0.000680647	-0.000716428	-0.00145315
1980	-0.000541383	-0.000829853	-0.000891279	-0.00172522		2080	-0.000418615	-0.000679527	-0.000714103	-0.00145026
1981	-0.000540453	-0.000828413	-0.000888721	-0.00172146		2081	-0.000418382	-0.000677766	-0.000714335	-0.00144858
1982	-0.000537663	-0.000826732	-0.000887791	-0.00171818		2082	-0.000417452	-0.000677206	-0.00071201	-0.0014461
1983	-0.0005365	-0.000824971	-0.000886629	-0.00171514		2083	-0.000416755	-0.000675284	-0.000712708	-0.00144386
1984	-0.000534175	-0.00082353	-0.000885699	-0.00171161		2084	-0.000415825	-0.000674804	-0.00071015	-0.00144058
1985	-0.000533477	-0.000821769	-0.000885466	-0.00170833		2085	-0.000413965	-0.000672883	-0.000710382	-0.00143778
1986	-0.000531152	-0.000820968	-0.000883839	-0.00170489		2086	-0.000414197	-0.000671682	-0.000707592	-0.00143505
1987	-0.000529292	-0.000819368	-0.000883141	-0.00170177		2087	-0.000412569	-0.000669601	-0.000707127	-0.00143233
1988	-0.000527664	-0.000819047	-0.000881513	-0.00169777		2088	-0.000412337	-0.00066784	-0.000704802	-0.00142993
1989	-0.000525572	-0.000817766	-0.000880816	-0.00169472		2089	-0.000409547	-0.000666399	-0.000704105	-0.00142665
1990	-0.000524177	-0.000817526	-0.000878723	-0.00169104		2090	-0.000408617	-0.000664798	-0.000702244	-0.00142401
1991	-0.000522317	-0.000816166	-0.000878723	-0.00168768		2091	-0.000407687	-0.000663918	-0.000701547	-0.00142113
1992	-0.000521852	-0.000815925	-0.000876631	-0.00168432		2092	-0.000408152	-0.000662237	-0.000699687	-0.00141857
1993	-0.000518829	-0.000814164	-0.000876398	-0.00168104		2093	-0.000406989	-0.000661116	-0.000697129	-0.0014152
1994	-0.000517434	-0.000813844	-0.000873608	-0.00167759		2094	-0.000406757	-0.000659115	-0.000695967	-0.0014132
1995	-0.000514411	-0.000812404	-0.00087384	-0.00167415		2095	-0.000405594	-0.000658395	-0.000694339	-0.0014104
1996	-0.000513946	-0.000811203	-0.000872213	-0.00167079		2096	-0.000403734	-0.000656714	-0.000693409	-0.00140824
1997	-0.000511621	-0.000810162	-0.00087198	-0.00166727		2097	-0.000403036	-0.000656153	-0.000690154	-0.00140584
1998	-0.000509063	-0.000808641	-0.000869423	-0.00166439		2098	-0.000402106	-0.000654552	-0.000689456	-0.00140344
[truncated: 2,002 more rows]
