# Supplementary material for: Structural plasticity of dendritic secretory compartments during LTP-induced synaptogenesis
Source: eLife journal article supplement (doi:10.7554/elife.46356), 2019-08-21
Supplement: supp [file elife-46356-supp-v1.zip › elife_poa_e46356_Figure_2_source_data_1.xlsx]

## Sheet: Fig2A
Fig2A	Condition	Series	Dendrite	Sample Image Sections
	Control	FXBVK	d23	102-105
	LTP	DCPBM	d35	99-102

## Sheet: Fig2B
Condition	Experiment	Series	Dendrite	PSD<0.05 per micron	PSD 0.05< to .10 per micron	PSD 0.1<to 0.15 per micron	PSD 0.15<to.2 per micron	PSD 0.2< per micron
Control	GC048	PWCNZ	d07	0.258325	0	0	0	0.172217
Control	GC048	PWCNZ	d11	0.493019	0.16434	0.16434	0	0
Control	GC046	FXBVK	d20	0.504383	0.336255	0.252191	0.168128	0
Control	GC046	FXBVK	d23	0.36016	0.4502	0.18008	0	0
Control	GC048	PWCNZ	d25	0.164247	0.24637	0.24637	0	0.164247
Control	GC048	PWCNZ	d26	0.255653	0.0852178	0	0.0852178	0.255653
Control	GC046	FXBVK	D61	0.49162	0.24581	0.24581	0	0
Control	GC046	FXBVK	d69	0.831059	0.302203	0	0.0755508	0
TBS	GC048	DCPBM	d13	1.11596	0.171686	0.0858428	0.0858428	0
TBS	GC046	FZYJV	d17	1.36408	0.104929	0.209858	0	0
TBS	GC048	DCPBM	d25	1.67915	0.353506	0	0	0
TBS	GC046	FZYJV	d26	1.54464	0.77232	0.154464	0.154464	0
TBS	GC046	FZYJV	d28	0.992457	0	0	0.14178	0.14178
TBS	GC046	FZYJV	d30	1.95088	0.410711	0.205356	0.308033	0
TBS	GC048	DCPBM	d32	2.16033	0.216033	0.216033	0.108017	0
TBS	GC048	DCPBM	d35	1.58026	0.748544	0.0831716	0.166343	0

## Sheet: Fig2C
Condition	Experiment	Series	Dendrite	% Spines w/SER
Control	GC046	FXBVK	D20	40
Control	GC046	FXBVK	D23	45.4545
Control	GC046	FXBVK	D61	33.3333
Control	GC046	FXBVK	D69	27.7778
Control	GC048	PWCNZ	D07	57.1429
Control	GC048	PWCNZ	D11	25
Control	GC048	PWCNZ	D25	50
Control	GC048	PWCNZ	D26	44.4444
TBS	GC046	FZYJV	D17	25
TBS	GC046	FZYJV	D26	11.1111
TBS	GC046	FZYJV	D28	25
TBS	GC046	FZYJV	D30	34.4828
TBS	GC048	DCPBM	D13	5
TBS	GC048	DCPBM	D25	28
TBS	GC048	DCPBM	D32	32.1429
TBS	GC048	DCPBM	D35	18.75

## Sheet: Fig2D
Condition	Experiment	Series	Dendrite	DenLeng	Total Spines total CONfa <0.05	Sp total CONfa <0.05/um	SER YES- N,H_total CONfa <0.05	Sp total CONfa<0.05 w SER N,H/um
Control	GC046	FXBVK	D20	11.8957	6	0.504383	2	0.168128
Control	GC046	FXBVK	D23	11.1062	4	0.36016	2	0.18008
Control	GC046	FXBVK	D61	12.2045	6	0.49162	2	0.163873
Control	GC046	FXBVK	D69	13.2361	8	0.604407	1	0.0755508
Control	GC048	PWCNZ	D07	11.6133	3	0.258325	2	0.172217
Control	GC048	PWCNZ	D11	12.1699	6	0.493019	1	0.0821698
Control	GC048	PWCNZ	D25	12.1768	1	0.0821235	1	0.0821235
Control	GC048	PWCNZ	D26	11.7346	3	0.255653	1	0.0852178
TBS	GC046	FZYJV	D17	9.53025	13	1.36408	2	0.209858
TBS	GC046	FZYJV	D26	6.474	10	1.54464	1	0.154464
TBS	GC046	FZYJV	D28	7.0532	7	0.992457	1	0.14178
TBS	GC046	FZYJV	D30	9.7392	18	1.8482	4	0.410711
TBS	GC048	DCPBM	D13	11.6492	11	0.944271	0	0
TBS	GC048	DCPBM	D25	11.3152	19	1.67915	5	0.441882
TBS	GC048	DCPBM	D32	9.25784	18	1.9443	6	0.648099
TBS	GC048	DCPBM	D35	12.0233	18	1.49709	1	0.0831716

## Sheet: Fig2E
Condition	Expt	Series	Dendrite	SER Name	CONfa	SER VOL
Control	GC048	PWCNZ	d07	d07ser11	<0.05	0.000159708
Control	GC048	PWCNZ	d07	d07ser07	<0.05	0.00324858
Control	GC048	PWCNZ	d11	d11ser05	<0.05	0.000127339
Control	GC046	FXBVK	d20	d20ser06	<0.05	0.000742433
Control	GC046	FXBVK	d20	d20ser17	<0.05	0.00248978
Control	GC046	FXBVK	d23	d23ser04	<0.05	0.000732617
Control	GC046	FXBVK	d23	d23ser12	<0.05	0.00174273
Control	GC048	PWCNZ	d25	d25ser14	<0.05	0.00278908
Control	GC048	PWCNZ	d26	d26ser13	<0.05	0.00074756
Control	GC046	FXBVK	d61	d61ser01	<0.05	0.000267662
Control	GC046	FXBVK	d61	d61ser13	<0.05	0.00175816
Control	GC046	FXBVK	d69	d69ser08	<0.05	0.000576645
TBS	GC046	FZYJV	d17	d17ser10	<0.05	0.00502903
TBS	GC046	FZYJV	d17	d17ser16	<0.05	0.000776658
TBS	GC048	DCPBM	d25	d25ser11	<0.05	0.00198891
TBS	GC048	DCPBM	d25	d25ser12	<0.05	0.00122811
TBS	GC048	DCPBM	d25	d25ser13	<0.05	0.00141807
TBS	GC048	DCPBM	d25	d25ser14	<0.05	0.00148029
TBS	GC048	DCPBM	d25	d25ser17	<0.05	0.00180545
TBS	GC046	FZYJV	d28	d28ser13	<0.05	0.00113373
TBS	GC046	FZYJV	d30	d30ser01	<0.05	0.000231757
TBS	GC046	FZYJV	d30	d30ser09b	<0.05	0.00164708
TBS	GC046	FZYJV	d30	d30ser26	<0.05	0.00221774
TBS	GC048	DCPBM	d32	d32ser03	<0.05	0.00246528
TBS	GC048	DCPBM	d32	d32ser06	<0.05	0.000550555
TBS	GC048	DCPBM	d32	d32ser06	<0.05	0.000550555
TBS	GC048	DCPBM	d32	d32ser22	<0.05	0.0025334

## Sheet: Fig2F
Expt	Series	Dendrite	Condition	SER Name	CONfa	SER SA
GC048	PWCNZ	d07	Control	d07ser11	<0.05	0.0234044
GC048	PWCNZ	d07	Control	d07ser07	<0.05	0.204632
GC048	PWCNZ	d11	Control	d11ser05	<0.05	0.0116741
GC046	FXBVK	d20	Control	d20ser06	<0.05	0.0467517
GC046	FXBVK	d20	Control	d20ser17	<0.05	0.197003
GC046	FXBVK	d23	Control	d23ser04	<0.05	0.0501415
GC046	FXBVK	d23	Control	d23ser12	<0.05	0.076796
GC048	PWCNZ	d25	Control	d25ser14	<0.05	0.154924
GC048	PWCNZ	d26	Control	d26ser13	<0.05	0.0501909
GC046	FXBVK	d61	Control	d61ser01	<0.05	0.0278664
GC046	FXBVK	d61	Control	d61ser13	<0.05	0.115926
GC046	FXBVK	d69	Control	d69ser08	<0.05	0.0323902
GC046	FZYJV	d17	TBS	d17ser10	<0.05	0.291916
GC046	FZYJV	d17	TBS	d17ser16	<0.05	0.0577669
GC048	DCPBM	d25	TBS	d25ser11	<0.05	0.117174
GC048	DCPBM	d25	TBS	d25ser12	<0.05	0.0845527
GC048	DCPBM	d25	TBS	d25ser13	<0.05	0.104239
GC048	DCPBM	d25	TBS	d25ser14	<0.05	0.118819
GC048	DCPBM	d25	TBS	d25ser17	<0.05	0.110879
GC046	FZYJV	d28	TBS	d28ser13	<0.05	0.244461
GC046	FZYJV	d30	TBS	d30ser01	<0.05	0.0199974
GC046	FZYJV	d30	TBS	d30ser09b	<0.05	0.11633
GC046	FZYJV	d30	TBS	d30ser26	<0.05	0.142733
GC048	DCPBM	d32	TBS	d32ser03	<0.05	0.0871558
GC048	DCPBM	d32	TBS	d32ser06	<0.05	0.0413434
GC048	DCPBM	d32	TBS	d32ser06	<0.05	0.0413434
GC048	DCPBM	d32	TBS	d32ser22	<0.05	0.151861

## Sheet: Fig2G
Condition	Experiment	Series	Dendrite	DenLeng	All Sp CONfa >=0.05	All Sp CONfa>=0.05/um	SERY Total CONfa >=0.05	Sp total CONfa>=0.05 w SER N,H/um
Control	GC046	FXBVK	D20	11.8957	9	0.756574	4	0.336255
Control	GC046	FXBVK	D23	11.1062	7	0.63028	3	0.27012
Control	GC046	FXBVK	D61	12.2045	6	0.49162	3	0.24581
Control	GC046	FXBVK	D69	13.2361	6	0.453305	4	0.302203
Control	GC048	PWCNZ	D07	11.6133	2	0.172217	2	0.172217
Control	GC048	PWCNZ	D11	12.1699	4	0.328679	2	0.16434
Control	GC048	PWCNZ	D25	12.1768	9	0.739111	4	0.328494
Control	GC048	PWCNZ	D26	11.7346	5	0.426089	3	0.255653
TBS	GC046	FZYJV	D17	9.53025	3	0.314787	3	0.314787
TBS	GC046	FZYJV	D26	6.474	7	1.08125	2	0.308928
TBS	GC046	FZYJV	D28	7.0532	2	0.283559	2	0.283559
TBS	GC046	FZYJV	D30	9.7392	10	1.02678	7	0.718745
TBS	GC048	DCPBM	D13	11.6492	5	0.429214	1	0.0858428
TBS	GC048	DCPBM	D25	11.3152	4	0.353506	3	0.265129
TBS	GC048	DCPBM	D32	9.25784	7	0.756116	6	0.648099
TBS	GC048	DCPBM	D35	12.0233	13	1.08123	5	0.415858

## Sheet: Fig2H
Condition	Experiment	Series	Dendrite	SER Name	CONfa	SER VOL
Control	GC048	PWCNZ	d07	d07ser06	>=0.05	0.00834925
Control	GC048	PWCNZ	d07	d07ser10	>=0.05	0.00870625
Control	GC048	PWCNZ	d11	d11ser10	>=0.05	0.0020844
Control	GC048	PWCNZ	d11	d11ser16	>=0.05	0.000356947
Control	GC046	FXBVK	d20	d20ser01	>=0.05	0.00356312
Control	GC046	FXBVK	d20	d20ser04	>=0.05	0.000765424
Control	GC046	FXBVK	d20	d20ser05	>=0.05	0.00184522
Control	GC046	FXBVK	d20	d20ser11	>=0.05	0.00265304
Control	GC046	FXBVK	d23	d23ser01	>=0.05	0.00698632
Control	GC046	FXBVK	d23	d23ser02	>=0.05	0.00274943
Control	GC046	FXBVK	d23	d23ser06	>=0.05	0.00620967
Control	GC048	PWCNZ	d25	d25ser02	>=0.05	0.00319487
Control	GC048	PWCNZ	d25	d25ser03	>=0.05	0.00423042
Control	GC048	PWCNZ	d25	d25ser10	>=0.05	0.0101604
Control	GC048	PWCNZ	d25	d25ser12	>=0.05	0.00016383
Control	GC048	PWCNZ	d26	d26ser06	>=0.05	0.0164135
Control	GC048	PWCNZ	d26	d26ser11	>=0.05	0.0110606
Control	GC048	PWCNZ	d26	d26ser12	>=0.05	0.00863056
Control	GC046	FXBVK	d61	d61ser02	>=0.05	0.00112487
Control	GC046	FXBVK	d61	d61ser10	>=0.05	0.00147151
Control	GC046	FXBVK	d61	d61ser23	>=0.05	0.00375782
Control	GC046	FXBVK	d69	d69ser10	>=0.05	0.00359567
Control	GC046	FXBVK	d69	d69ser11	>=0.05	0.00268722
Control	GC046	FXBVK	d69	d69ser12	>=0.05	0.00184555
Control	GC046	FXBVK	d69	d69ser19	>=0.05	0.000467911
Control	GC048	DCPBM	d13	d13ser19	>=0.05	0.00756575
Control	GC046	FZYJV	d17	d17ser05	>=0.05	0.000502425
Control	GC046	FZYJV	d17	d17ser09	>=0.05	0.00552413
Control	GC046	FZYJV	d17	d17ser13	>=0.05	0.000749102
TBS	GC048	DCPBM	d25	d25ser06	>=0.05	0.00332101
TBS	GC048	DCPBM	d25	d25ser24	>=0.05	0.00141683
TBS	GC048	DCPBM	d25	d25ser25	>=0.05	0.00072642
TBS	GC046	FZYJV	d26	d26ser15	>=0.05	0.000935946
TBS	GC046	FZYJV	d26	d26ser19	>=0.05	0.00406329
TBS	GC046	FZYJV	d28	d28ser12	>=0.05	0.00150086
TBS	GC046	FZYJV	d28	d28ser15	>=0.05	0.00441894
TBS	GC046	FZYJV	d30	d30ser06	>=0.05	0.0054205
TBS	GC046	FZYJV	d30	d30ser09a	>=0.05	0.00290019
TBS	GC046	FZYJV	d30	d30ser15	>=0.05	0.00133381
TBS	GC046	FZYJV	d30	d30ser20	>=0.05	0.00150214
TBS	GC046	FZYJV	d30	d30ser24a	>=0.05	0.00166449
TBS	GC046	FZYJV	d30	d30ser27	>=0.05	0.00146358
TBS	GC046	FZYJV	d30	d30ser28	>=0.05	0.00434019
TBS	GC048	DCPBM	d32	d32ser09	>=0.05	0.00118582
TBS	GC048	DCPBM	d32	d32ser10	>=0.05	0.00165413
TBS	GC048	DCPBM	d32	d32ser13	>=0.05	0.00139096
TBS	GC048	DCPBM	d32	d32ser17	>=0.05	0.00520989
TBS	GC048	DCPBM	d32	d32ser26	>=0.05	0.00686171
TBS	GC048	DCPBM	d32	d32ser27	>=0.05	0.00340534
TBS	GC048	DCPBM	d35	d35ser08	>=0.05	0.000757557
TBS	GC048	DCPBM	d35	d35ser13	>=0.05	0.00718729
TBS	GC048	DCPBM	d35	d35ser15	>=0.05	0.00438971
TBS	GC048	DCPBM	d35	d35ser23	>=0.05	0.00526203
TBS	GC048	DCPBM	d35	d35ser24	>=0.05	0.00808366

## Sheet: Fig2I
Condition	Experiment	Series	Dendrite	SER Name	CONfa	SER SA
Control	GC048	PWCNZ	d07	d07ser06	>=0.05	0.511875
Control	GC048	PWCNZ	d07	d07ser10	>=0.05	0.353265
Control	GC048	PWCNZ	d11	d11ser10	>=0.05	0.141046
Control	GC048	PWCNZ	d11	d11ser16	>=0.05	0.0236846
Control	GC046	FXBVK	d20	d20ser01	>=0.05	0.243928
Control	GC046	FXBVK	d20	d20ser04	>=0.05	0.0569729
Control	GC046	FXBVK	d20	d20ser05	>=0.05	0.12825
Control	GC046	FXBVK	d20	d20ser11	>=0.05	0.134286
Control	GC046	FXBVK	d23	d23ser01	>=0.05	0.328889
Control	GC046	FXBVK	d23	d23ser02	>=0.05	0.0914338
Control	GC046	FXBVK	d23	d23ser06	>=0.05	0.394027
Control	GC048	PWCNZ	d25	d25ser02	>=0.05	0.218589
Control	GC048	PWCNZ	d25	d25ser03	>=0.05	0.383372
Control	GC048	PWCNZ	d25	d25ser10	>=0.05	0.476711
Control	GC048	PWCNZ	d25	d25ser12	>=0.05	0.0147907
Control	GC048	PWCNZ	d26	d26ser06	>=0.05	0.99049
Control	GC048	PWCNZ	d26	d26ser11	>=0.05	0.395118
Control	GC048	PWCNZ	d26	d26ser12	>=0.05	0.413831
Control	GC046	FXBVK	d61	d61ser02	>=0.05	0.0771795
Control	GC046	FXBVK	d61	d61ser10	>=0.05	0.0906542
Control	GC046	FXBVK	d61	d61ser23	>=0.05	0.215551
Control	GC046	FXBVK	d69	d69ser10	>=0.05	0.150051
Control	GC046	FXBVK	d69	d69ser11	>=0.05	0.146139
Control	GC046	FXBVK	d69	d69ser12	>=0.05	0.11269
Control	GC046	FXBVK	d69	d69ser19	>=0.05	0.0225038
Control	GC048	DCPBM	d13	d13ser19	>=0.05	0.31602
Control	GC046	FZYJV	d17	d17ser05	>=0.05	0.0390422
Control	GC046	FZYJV	d17	d17ser09	>=0.05	0.241406
Control	GC046	FZYJV	d17	d17ser13	>=0.05	0.0824239
TBS	GC048	DCPBM	d25	d25ser06	>=0.05	0.16267
TBS	GC048	DCPBM	d25	d25ser24	>=0.05	0.0766986
TBS	GC048	DCPBM	d25	d25ser25	>=0.05	0.0457801
TBS	GC046	FZYJV	d26	d26ser15	>=0.05	0.0802097
TBS	GC046	FZYJV	d26	d26ser19	>=0.05	0.223311
TBS	GC046	FZYJV	d28	d28ser12	>=0.05	0.103582
TBS	GC046	FZYJV	d28	d28ser15	>=0.05	0.24712
TBS	GC046	FZYJV	d30	d30ser06	>=0.05	0.293279
TBS	GC046	FZYJV	d30	d30ser09a	>=0.05	0.212644
TBS	GC046	FZYJV	d30	d30ser15	>=0.05	0.100281
TBS	GC046	FZYJV	d30	d30ser20	>=0.05	0.0654965
TBS	GC046	FZYJV	d30	d30ser24a	>=0.05	0.107981
TBS	GC046	FZYJV	d30	d30ser27	>=0.05	0.0863472
TBS	GC046	FZYJV	d30	d30ser28	>=0.05	0.351499
TBS	GC048	DCPBM	d32	d32ser09	>=0.05	0.0696189
TBS	GC048	DCPBM	d32	d32ser10	>=0.05	0.117483
TBS	GC048	DCPBM	d32	d32ser13	>=0.05	0.0789814
TBS	GC048	DCPBM	d32	d32ser17	>=0.05	0.0696373
TBS	GC048	DCPBM	d32	d32ser26	>=0.05	0.213445
TBS	GC048	DCPBM	d32	d32ser27	>=0.05	0.194732
TBS	GC048	DCPBM	d35	d35ser08	>=0.05	0.0558079
TBS	GC048	DCPBM	d35	d35ser13	>=0.05	0.301755
TBS	GC048	DCPBM	d35	d35ser15	>=0.05	0.186014
TBS	GC048	DCPBM	d35	d35ser23	>=0.05	0.350232
TBS	GC048	DCPBM	d35	d35ser24	>=0.05	0.332864

## Sheet: Summary Statistics
Fig2B	Sp total CONfa<0.05						Fig2B	Sp total CONfa 0.05 to 0.1							Fig2B	Sp total CONfa 0.1 to 0.15						Fig2B	Sp total CONfa 0.15 to 0.2						Fig2B	Sp total CONfa > 0.2
	SS	Degr. Of Freedom	MS	F	p			SS	Degr. Of Freedom	MS	F	p				SS	Degr. Of Freedom	MS	F	p			SS	Degr. Of Freedom	MS	F	p			SS	Degr. Of Freedom	MS	F	p
Intercept	15.4965	1	15.4965	154.21	3.29866e-08		Intercept	1.32718	1	1.32718	25.5301	0.000283226			Intercept	0.260998	1	0.260998	22.3925	0.000486817		Intercept	0.104551	1	0.104551	14.5203	0.00248173		Intercept	0.0336628	1	0.0336628	8.17393	0.0143803
Experiment	0.00690279	1	0.00690279	0.0686919	0.797696		Experiment	0.0253393	1	0.0253393	0.487436	0.49838			Experiment	0.0127691	1	0.0127691	1.09553	0.315874		Experiment	0.0101272	1	0.0101272	1.40648	0.258593		Experiment	0.0126753	1	0.0126753	3.07778	0.104845
DECODE	5.0955	1	5.0955	50.707	1.21209e-05		DECODE	0.05609	1	0.05609	1.07897	0.319406			DECODE	0.00112336	1	0.00112336	0.0963796	0.761544		DECODE	0.0252479	1	0.0252479	3.50648	0.0856897		DECODE	0.0126753	1	0.0126753	3.07778	0.104845
Experiment*DECODE	0.180545	1	0.180545	1.79666	0.204943		Experiment*DECODE	0.0676454	1	0.0676454	1.30125	0.27624			Experiment*DECODE	0.00042788	1	0.00042788	0.0367103	0.85126		Experiment*DECODE	0.00045811	1	0.00045811	0.0636233	0.805127		Experiment*DECODE	0.0336628	1	0.0336628	8.17393	0.0143803
Error	1.20587	12	0.100489				Error	0.623818	12	0.0519848					Error	0.139867	12	0.0116556				Error	0.0864042	12	0.00720035				Error	0.0494198	12	0.00411831
NOTE: "DECODE"=CON vs LTP							NOTE: "DECODE"=CON vs LTP								NOTE: "DECODE"=CON vs LTP							NOTE: "DECODE"=CON vs LTP							NOTE: "DECODE"=CON vs LTP
SS Condition / (SS Condition + SS Error) = effect size							SS Condition / (SS Condition + SS Error) = effect size								SS Condition / (SS Condition + SS Error) = effect size							SS Condition / (SS Condition + SS Error) = effect size							SS Condition / (SS Condition + SS Error) = effect size
Effect size:							Effect size:								Effect size:							Effect size:							Effect size:
Eta squared	0.808634						Eta squared	(N.S.)							Eta squared	(N.S.)						Eta squared	(N.S.)						Eta squared	(N.S.)
DECODE	Mean	Std Err	-0.95	0.95	N		DECODE	Mean	Std Err	-0.95	0.95	N			DECODE	Mean	Std Err	-0.95	0.95	N		DECODE	Mean	Std Err	-0.95	0.95	N		DECODE	Mean	Std Err	-0.95	0.95	N
120CON	0.419808	0.074245	0.244247	0.59537	8		120CON	0.2288	0.0506513	0.109028	0.348571	8			120CON	0.136099	0.0413984	0.0382072	0.233991	8		120CON	0.041112	0.0222467	-0.0114931	0.0937171	8		120CON	0.0740147	0.0373614	-0.0143311	0.16236	8
120LTP	1.54847	0.13917	1.21938	1.87755	8		120LTP	0.347216	0.101166	0.107997	0.586435	8			120LTP	0.119341	0.031929	0.0438406	0.194841	8		120LTP	0.12056	0.0351716	0.0373924	0.203727	8		120LTP	0.0177224	0.0177224	-0.0241845	0.0596294	8
Fig2C	% Sp +SER
	F(1, 12)=2.5944, p=.13322
	SS	Degr. Of Freedom	MS	F	p
Intercept	15790.4	1	15790.4	129.74	8.62631e-08
tiss	1290	1	1290	10.5991	0.00688421
Experiment	20.9778	1	20.9778	0.172362	0.685348
tiss*Experiment	108.799	1	108.799	0.893931	0.363064
Error	1460.5	12	121.708
NOTE: "tiss" = CON vs LTP
SS Condition / (SS Condition + SS Error) = effect size
Effect size:
Eta squared	0.870753
DECODE	Mean	Std Err	-0.95	0.95	N
control	40.3941	3.92102	36.4731	44.3151	8
TBS	22.4358	3.60879	18.8271	26.0446	8
Fig2D	Sp total CONfa<0.05 w SER N,H/um
	F(1, 12)=2.5944, p=.13322
	SS	Degr. Of Freedom	MS	F	p
Intercept	0.600364	1	0.600364	21.3419	0.000590471
tiss	0.0729818	1	0.0729818	2.59437	0.133218
Experiment	0.000511167	1	0.000511167	0.0181711	0.895005
tiss*Experiment	0.0111431	1	0.0111431	0.396118	0.540898
Error	0.33757	12	0.0281308
NOTE: "tiss" = CON vs LTP
SS Condition / (SS Condition + SS Error) = effect size
Effect size:
Eta squared	(N.S.)
DECODE	Mean	Std Err	minus std err	plus std err	N
control	0.12617	0.0170734	0.109097	0.143243	8
TBS	0.261246	0.0771015	0.184144	0.338347	8
Fig2E	AVG SER VOL psd<0.05_by total PSD
	SS	Deg Freedom	MS	F	P
Intercept	4.77338e-05	1	4.77338e-05	28.7696	9.99431e-05
EXPERIMENT	3.16053e-10	1	3.16053e-10	0.000190488	0.989183
DECODE(EXPERIMENT)	3.29647e-07	1	3.29647e-07	0.198681	0.662603
Series+Dendrite(EXPERIMENT*DECODE)	8.40666e-06	9	9.34073e-07	0.562974	0.805529
DECODE	1.21304e-06	1	1.21304e-06	0.731112	0.406918
Error	2.32285e-05	14	1.65918e-06
NOTE: "DECODE"=CON vs LTP
DECODE	Mean	Std Err	-0.95	0.95	N
120CON	0.00128186	0.000314236	0.000590229	0.00197349	12
120LTP	0.00167044	0.000301084	0.00102468	0.0023162	15
Fig2F	AVG SER SA psd<0.05_by total PSD
	SS	Deg Freedom	MS	F	P
Intercept	0.250682	1	0.250682	45.7719	9.08894e-06
EXPERIMENT	0.00534904	1	0.00534904	0.976679	0.339794
DECODE(EXPERIMENT)	0.0408732	9	0.00454146	0.829224	0.601261
Series+Dendrite(EXPERIMENT*DECODE)	0.0110232	1	0.0110232	2.01273	0.177862
DECODE	0.0181388	1	0.0181388	3.31196	0.0902209
Error	0.0766747	14	0.00547676
NOTE: "DECODE"=CON vs LTP
DECODE	Mean	Std Err	-0.95	0.95	N
120CON	0.0826417	0.0198088	0.0390428	0.126241	12
120LTP	0.115371	0.0189225	0.0747866	0.155956	15
Fig2G	Sp total CONfa>=0.05 w SER N,H/um
	SS	Degr. Of Freedom	MS	F	p
Intercept	1.63587	1	1.63587	60.7175	4.9178e-06
tiss	0.0583048	1	0.0583048	2.16407	0.167002
Experiment	0.012364	1	0.012364	0.458909	0.510984
tiss*Experiment	3.19079e-05	1	3.19079e-05	0.00118431	0.973113
Error	0.323307	12	0.0269423
SS Condition / (SS Condition + SS Error) = effect size
Effect size:
Eta squared	0.152786
DECODE	Mean	Std Err	minus std err	plus std err	N
control	0.259387	0.0229377	0.236449	0.282324	8
TBS	0.380119	0.0739497	0.306169	0.454068	8
Fig2H	AVG SER VOL psd>=0.05_by total PSD
	SS	Deg Freedom	MS	F	P
Intercept	0.000677415	1	0.000677415	120.119	2.51577e-13
EXPERIMENT	6.38422e-05	1	6.38422e-05	11.3205	0.00176231
DECODE(EXPERIMENT)	2.85272e-05	1	2.85272e-05	5.05845	0.0303823
Series+Dendrite(EXPERIMENT*DECODE)	0.000219693	12	1.83077e-05	3.24633	0.00275352
DECODE	3.22608e-05	1	3.22608e-05	5.72051	0.0218216
Error	0.000214301	38	5.63951e-06
NOTE: "DECODE"=CON vs LTP
SS Condition / (SS Condition + SS Error) = effect size
Effect size:
Eta squared	0.130843
DECODE	Mean	Std Err	-0.95	0.95	N
120CON	0.00439363	0.000733024	0.0028921	0.00589516	29
120LTP	0.00321585	0.000440076	0.00230758	0.00412412	25
Fig2I	AVG SER SA psd>=0.05
	SS	Deg Freedom	MS	F	P
Intercept	1.83409	1	1.83409	103.711	2.05247e-12
EXPERIMENT	0.0941427	1	0.0941427	5.32344	0.026583
DECODE(EXPERIMENT)	0.481995	12	0.0401662	2.27126	0.0272555
Series+Dendrite(EXPERIMENT*DECODE)	0.107877	1	0.107877	6.10005	0.018123
DECODE	0.0811242	1	0.0811242	4.58729	0.0386819
Error	0.672013	38	0.0176846
NOTE: "DECODE"=CON vs LTP
SS Condition / (SS Condition + SS Error) = effect size
Effect size:
Eta squared	0.107715
DECODE	Mean	Std Err	-0.95	0.95	N
120CON	0.234283	0.0384323	0.155558	0.313008	29
120LTP	0.165099	0.0201986	0.123411	0.206787	25
