# Supplementary material for: Structural plasticity of dendritic secretory compartments during LTP-induced synaptogenesis
Source: eLife journal article supplement (doi:10.7554/elife.46356), 2019-08-21
Supplement: supp [file elife-46356-supp-v1.zip › elife_poa_e46356_Figure_3_source_data_1.xlsx]

## Sheet: Fig3A
Fig3A	Condition	Series	Dendrite	Section
	CON - Aspiny	PWCNZ	d25	180
	CON - Spiny	PWCNZ	d25	163
	LTP - Aspiny	DCPBM	d25	119
	LTP - Spiny	DCPBM	d25	107

## Sheet: Fig3B
Fig3B	Condition	Series	Dendrite
	CON	PWCNZ	d25
	LTP	PWCNZ	d25

## Sheet: Fig3C
Condition	Experiment	Series	Dendrite	DenLeng	ShaftSERSA	ShaftSERSA/um
Control	GC046	FXBVK	D20	11.8957	7.90149	0.664229
Control	GC046	FXBVK	D23	11.1062	5.80013	0.522244
Control	GC046	FXBVK	D61	12.2045	7.13383	0.584523
Control	GC046	FXBVK	D69	13.2361	5.11349	0.386329
Control	GC048	PWCNZ	D07	11.6133	10.4956	0.90376
Control	GC048	PWCNZ	D11	12.1699	6.82617	0.560905
Control	GC048	PWCNZ	D25	12.1768	8.92328	0.732811
Control	GC048	PWCNZ	D26	11.7346	9.56311	0.814947
TBS	GC046	FZYJV	D17	9.53025	5.83429	0.612187
TBS	GC046	FZYJV	D26	6.474	2.11863	0.327252
TBS	GC046	FZYJV	D28	7.0532	3.22301	0.456957
TBS	GC046	FZYJV	D30	9.7392	4.33306	0.444909
TBS	GC048	DCPBM	D13	11.6492	7.07627	0.607447
TBS	GC048	DCPBM	D25	11.3152	6.62145	0.58518
TBS	GC048	DCPBM	D32	9.25784	5.86814	0.633856
TBS	GC048	DCPBM	D35	12.0233	7.54461	0.627497

## Sheet: Fig3D
Condition	Experiment	Series	Dendrite	DenLeng	ShaftSERvol	ShaftSERvol/um
Control	GC046	FXBVK	D20	11.8957	0.123831	0.0104097
Control	GC046	FXBVK	D23	11.1062	0.122618	0.0110405
Control	GC046	FXBVK	D61	12.2045	0.0921079	0.00754702
Control	GC046	FXBVK	D69	13.2361	0.0959437	0.00724863
Control	GC048	PWCNZ	D07	11.6133	0.173717	0.0149585
Control	GC048	PWCNZ	D11	12.1699	0.104515	0.00858798
Control	GC048	PWCNZ	D25	12.1768	0.13838	0.0113642
Control	GC048	PWCNZ	D26	11.7346	0.14536	0.0123873
TBS	GC046	FZYJV	D17	9.53025	0.0923997	0.00969542
TBS	GC046	FZYJV	D26	6.474	0.0302224	0.00466828
TBS	GC046	FZYJV	D28	7.0532	0.0464475	0.00658531
TBS	GC046	FZYJV	D30	9.7392	0.0594373	0.00610289
TBS	GC048	DCPBM	D13	11.6492	0.109929	0.00943661
TBS	GC048	DCPBM	D25	11.3152	0.090223	0.00797359
TBS	GC048	DCPBM	D32	9.25784	0.0896885	0.00968784
TBS	GC048	DCPBM	D35	12.0233	0.111012	0.00923305

## Sheet: Fig3E
Condition	Experiment	Series	Dendrite	Section	# Sp in Segment	# Syn in Segment	Aspiny vs Spiny	Summed Shaft SER x-area
Control	GC046	FXBVK	FXBVK D20	41	1	1	Spiny	0.0198707
Control	GC046	FXBVK	FXBVK D20	42	1	1	Spiny	0.0223375
Control	GC046	FXBVK	FXBVK D20	43	1	1	Spiny	0.00961129
Control	GC046	FXBVK	FXBVK D20	44	1	1	Spiny	0.0308899
Control	GC046	FXBVK	FXBVK D20	45	1	1	Spiny	0.022173
Control	GC046	FXBVK	FXBVK D20	46	1	1	Spiny	0.0162262
Control	GC046	FXBVK	FXBVK D20	47	0	0	Aspiny	0.0104715
Control	GC046	FXBVK	FXBVK D20	48	0	0	Aspiny	0.00535884
Control	GC046	FXBVK	FXBVK D20	49	0	0	Aspiny	0.00851909
Control	GC046	FXBVK	FXBVK D20	50	0	0	Aspiny	0.0151118
Control	GC046	FXBVK	FXBVK D20	51	0	0	Aspiny	0.00686989
Control	GC046	FXBVK	FXBVK D20	52	0	0	Aspiny	0.00371622
Control	GC046	FXBVK	FXBVK D20	53	0	0	Aspiny	0.00186006
Control	GC046	FXBVK	FXBVK D20	54	1	1	Spiny	0.00238946
Control	GC046	FXBVK	FXBVK D20	55	1	1	Spiny	0.00651729
Control	GC046	FXBVK	FXBVK D20	56	1	1	Spiny	0.00402796
Control	GC046	FXBVK	FXBVK D20	57	1	1	Spiny	0.00167283
Control	GC046	FXBVK	FXBVK D20	58	1	1	Spiny	0.0108737
Control	GC046	FXBVK	FXBVK D20	59	1	1	Spiny	0.0128614
Control	GC046	FXBVK	FXBVK D20	60	1	1	Spiny	0.00907795
Control	GC046	FXBVK	FXBVK D20	61	1	1	Spiny	0.00371607
Control	GC046	FXBVK	FXBVK D20	62	1	1	Spiny	0.00695462
Control	GC046	FXBVK	FXBVK D20	63	0	0	Aspiny	0.000447672
Control	GC046	FXBVK	FXBVK D20	64	0	0	Aspiny	0.0110677
Control	GC046	FXBVK	FXBVK D20	65	0	0	Aspiny	0.0113107
Control	GC046	FXBVK	FXBVK D20	66	0	0	Aspiny	0.00340879
Control	GC046	FXBVK	FXBVK D20	67	0	0	Aspiny	0.00551902
Control	GC046	FXBVK	FXBVK D20	68	0	0	Aspiny	0.0169357
Control	GC046	FXBVK	FXBVK D20	69	0	0	Aspiny	0.017515
Control	GC046	FXBVK	FXBVK D20	70	0	0	Aspiny	0.0167489
Control	GC046	FXBVK	FXBVK D20	71	1	1	Spiny	0.00857337
Control	GC046	FXBVK	FXBVK D20	72	1	1	Spiny	0.0279591
Control	GC046	FXBVK	FXBVK D20	73	0	0	Aspiny	0.0301598
Control	GC046	FXBVK	FXBVK D20	74	0	0	Aspiny	0.0303542
Control	GC046	FXBVK	FXBVK D20	75	0	0	Aspiny	0.0269329
Control	GC046	FXBVK	FXBVK D20	76	2	2	Spiny	0.0229874
Control	GC046	FXBVK	FXBVK D20	77	2	2	Spiny	0.0143754
Control	GC046	FXBVK	FXBVK D20	78	2	2	Spiny	0.0052935
Control	GC046	FXBVK	FXBVK D20	79	2	2	Spiny	0.0121904
Control	GC046	FXBVK	FXBVK D20	80	2	2	Spiny	0.0125539
Control	GC046	FXBVK	FXBVK D20	81	2	2	Spiny	0.00656728
Control	GC046	FXBVK	FXBVK D20	82	2	2	Spiny	0.0071554
Control	GC046	FXBVK	FXBVK D20	83	2	2	Spiny	0.00879225
Control	GC046	FXBVK	FXBVK D20	84	2	2	Spiny	0.0146482
Control	GC046	FXBVK	FXBVK D20	85	0	0	Aspiny	0.0203256
Control	GC046	FXBVK	FXBVK D20	86	0	0	Aspiny	0.0191108
Control	GC046	FXBVK	FXBVK D20	87	0	0	Aspiny	0.0110416
Control	GC046	FXBVK	FXBVK D20	88	0	0	Aspiny	0.00933543
Control	GC046	FXBVK	FXBVK D20	89	1	1	Spiny	0.00833567
Control	GC046	FXBVK	FXBVK D20	90	1	1	Spiny	0.012187
Control	GC046	FXBVK	FXBVK D20	91	1	1	Spiny	0.00280216
Control	GC046	FXBVK	FXBVK D20	92	1	1	Spiny	0.00570933
Control	GC046	FXBVK	FXBVK D20	93	0	0	Aspiny	0.00413565
Control	GC046	FXBVK	FXBVK D20	94	0	0	Aspiny	0.00173074
Control	GC046	FXBVK	FXBVK D20	95	0	0	Aspiny	0.00180703
Control	GC046	FXBVK	FXBVK D20	96	0	0	Aspiny	0.00322059
Control	GC046	FXBVK	FXBVK D20	97	0	0	Aspiny	0.0024714
Control	GC046	FXBVK	FXBVK D20	98	0	0	Aspiny	0.00403398
Control	GC046	FXBVK	FXBVK D20	99	0	0	Aspiny	0.00474157
Control	GC046	FXBVK	FXBVK D20	100	0	0	Aspiny	0.00351411
Control	GC046	FXBVK	FXBVK D20	101	0	0	Aspiny	0.00538898
Control	GC046	FXBVK	FXBVK D20	102	0	0	Aspiny	0.00565797
Control	GC046	FXBVK	FXBVK D20	103	0	0	Aspiny	0.00487432
Control	GC046	FXBVK	FXBVK D20	104	0	0	Aspiny	0.0011426
Control	GC046	FXBVK	FXBVK D20	105	1	1	Spiny	0.00341673
Control	GC046	FXBVK	FXBVK D20	106	1	1	Spiny	0.00469536
Control	GC046	FXBVK	FXBVK D20	107	1	1	Spiny	0.00799305
Control	GC046	FXBVK	FXBVK D20	108	0	0	Aspiny	0.00542844
Control	GC046	FXBVK	FXBVK D20	109	0	0	Aspiny	0.00131378
Control	GC046	FXBVK	FXBVK D20	110	0	0	Aspiny	0.00393391
Control	GC046	FXBVK	FXBVK D20	111	0	0	Aspiny	0.00396221
Control	GC046	FXBVK	FXBVK D20	112	0	0	Aspiny	0.00454993
Control	GC046	FXBVK	FXBVK D20	113	0	0	Aspiny	0.00777993
Control	GC046	FXBVK	FXBVK D20	114	0	0	Aspiny	0.017106
Control	GC046	FXBVK	FXBVK D20	115	0	0	Aspiny	0.0107891
Control	GC046	FXBVK	FXBVK D20	116	0	0	Aspiny	0.00786025
Control	GC046	FXBVK	FXBVK D20	117	1	1	Spiny	0.00953565
Control	GC046	FXBVK	FXBVK D20	118	1	1	Spiny	0.00889351
Control	GC046	FXBVK	FXBVK D20	119	1	1	Spiny	0.00957276
Control	GC046	FXBVK	FXBVK D20	120	1	1	Spiny	0.0125327
Control	GC046	FXBVK	FXBVK D20	121	0	0	Aspiny	0.0121285
Control	GC046	FXBVK	FXBVK D20	122	0	0	Aspiny	0.0116038
Control	GC046	FXBVK	FXBVK D20	123	0	0	Aspiny	0.00969978
Control	GC046	FXBVK	FXBVK D20	124	0	0	Aspiny	0.00772677
Control	GC046	FXBVK	FXBVK D20	125	0	0	Aspiny	0.003863
Control	GC046	FXBVK	FXBVK D20	126	0	0	Aspiny	0.0225404
Control	GC046	FXBVK	FXBVK D20	127	0	0	Aspiny	0.0199627
Control	GC046	FXBVK	FXBVK D20	128	0	0	Aspiny	0.0102314
Control	GC046	FXBVK	FXBVK D20	129	0	0	Aspiny	0.00565695
Control	GC046	FXBVK	FXBVK D20	130	0	0	Aspiny	0.00536077
Control	GC046	FXBVK	FXBVK D20	131	0	0	Aspiny	0.00333821
Control	GC046	FXBVK	FXBVK D20	132	0	0	Aspiny	0.0106607
Control	GC046	FXBVK	FXBVK D20	133	0	0	Aspiny	0.0124446
Control	GC046	FXBVK	FXBVK D20	134	1	1	Spiny	0.00797728
Control	GC046	FXBVK	FXBVK D20	135	1	1	Spiny	0.0110611
Control	GC046	FXBVK	FXBVK D20	136	1	1	Spiny	0.0309667
Control	GC046	FXBVK	FXBVK D20	137	1	1	Spiny	0.0286978
Control	GC046	FXBVK	FXBVK D20	138	1	1	Spiny	0.0231656
Control	GC046	FXBVK	FXBVK D20	139	1	1	Spiny	0.0139481
Control	GC046	FXBVK	FXBVK D20	140	0	0	Aspiny	0.0107663
Control	GC046	FXBVK	FXBVK D20	141	0	0	Aspiny	0.0138519
Control	GC046	FXBVK	FXBVK D20	142	0	0	Aspiny	0.0198735
Control	GC046	FXBVK	FXBVK D20	143	0	0	Aspiny	0.00978054
Control	GC046	FXBVK	FXBVK D20	144	0	0	Aspiny	0.0326379
Control	GC046	FXBVK	FXBVK D20	145	0	0	Aspiny	0.017599
Control	GC046	FXBVK	FXBVK D20	146	0	0	Aspiny	0.0196876
Control	GC046	FXBVK	FXBVK D20	147	2	2	Spiny	0.0134139
Control	GC046	FXBVK	FXBVK D20	148	2	2	Spiny	0.0205146
Control	GC046	FXBVK	FXBVK D20	149	2	2	Spiny	0.0180422
Control	GC046	FXBVK	FXBVK D20	150	2	2	Spiny	0.0391717
Control	GC046	FXBVK	FXBVK D20	151	2	2	Spiny	0.0336575
Control	GC046	FXBVK	FXBVK D20	152	2	2	Spiny	0.0421014
Control	GC046	FXBVK	FXBVK D20	153	2	2	Spiny	0.0263824
Control	GC046	FXBVK	FXBVK D20	154	2	2	Spiny	0.032726
Control	GC046	FXBVK	FXBVK D20	155	2	2	Spiny	0.0273975
Control	GC046	FXBVK	FXBVK D20	156	0	0	Aspiny	0.0073874
Control	GC046	FXBVK	FXBVK D20	157	0	0	Aspiny	0.00116522
Control	GC046	FXBVK	FXBVK D20	158	0	0	Aspiny	0.00264633
Control	GC046	FXBVK	FXBVK D20	159	0	0	Aspiny	0.00419345
Control	GC046	FXBVK	FXBVK D20	160	0	0	Aspiny	0.00249945
Control	GC046	FXBVK	FXBVK D20	161	0	0	Aspiny	0.00422827
Control	GC046	FXBVK	FXBVK D20	162	1	1	Spiny	0.0047759
Control	GC046	FXBVK	FXBVK D20	163	1	1	Spiny	0.000433545
Control	GC046	FXBVK	FXBVK D20	164	1	1	Spiny	0.00330494
Control	GC046	FXBVK	FXBVK D20	165	0	0	Aspiny	0.00893705
Control	GC046	FXBVK	FXBVK D20	166	0	0	Aspiny	0.0128928
Control	GC046	FXBVK	FXBVK D20	167	0	0	Aspiny	0.0109998
Control	GC046	FXBVK	FXBVK D20	168	0	0	Aspiny	0.0123154
Control	GC046	FXBVK	FXBVK D20	169	0	0	Aspiny	0.0113763
Control	GC046	FXBVK	FXBVK D20	170	0	0	Aspiny	0.00463672
Control	GC046	FXBVK	FXBVK D20	171	0	0	Aspiny	0.00285676
Control	GC046	FXBVK	FXBVK D20	172	0	0	Aspiny	0.00157367
Control	GC046	FXBVK	FXBVK D20	173	0	0	Aspiny	0.00367544
Control	GC046	FXBVK	FXBVK D20	174	0	0	Aspiny	0.00436442
Control	GC046	FXBVK	FXBVK D20	175	0	0	Aspiny	0.00941502
Control	GC046	FXBVK	FXBVK D20	176	0	0	Aspiny	0.0114582
Control	GC046	FXBVK	FXBVK D20	177	0	0	Aspiny	0.00830343
Control	GC046	FXBVK	FXBVK D20	178	0	0	Aspiny	0.00629829
Control	GC046	FXBVK	FXBVK D20	179	0	0	Aspiny	0.00586771
Control	GC046	FXBVK	FXBVK D20	180	0	0	Aspiny	0.002863
Control	GC046	FXBVK	FXBVK D20	181	0	0	Aspiny	0.00123862
Control	GC046	FXBVK	FXBVK D20	182	0	0	Aspiny	0.00210285
Control	GC046	FXBVK	FXBVK D20	183	0	0	Aspiny	0.0120895
Control	GC046	FXBVK	FXBVK D20	184	0	0	Aspiny	0.0163684
Control	GC046	FXBVK	FXBVK D20	185	2	2	Spiny	0.0217628
Control	GC046	FXBVK	FXBVK D20	186	2	2	Spiny	0.0197943
Control	GC046	FXBVK	FXBVK D20	187	2	2	Spiny	0.013153
Control	GC046	FXBVK	FXBVK D20	188	2	2	Spiny	0.00864093
Control	GC046	FXBVK	FXBVK D20	189	2	2	Spiny	0.0131199
Control	GC046	FXBVK	FXBVK D20	190	2	2	Spiny	0.0133409
Control	GC046	FXBVK	FXBVK D20	191	2	2	Spiny	0.00354079
Control	GC046	FXBVK	FXBVK D20	192	2	2	Spiny	0.000523408
Control	GC046	FXBVK	FXBVK D20	193	2	2	Spiny	0.00132659
Control	GC046	FXBVK	FXBVK D20	194	2	2	Spiny	0.00343167
Control	GC046	FXBVK	FXBVK D20	195	0	0	Aspiny	0.00491259
Control	GC046	FXBVK	FXBVK D20	196	0	0	Aspiny	0.00495071
Control	GC046	FXBVK	FXBVK D20	197	0	0	Aspiny	0.00339037
Control	GC046	FXBVK	FXBVK D20	198	0	0	Aspiny	0.00283195
Control	GC046	FXBVK	FXBVK D20	199	0	0	Aspiny	0.00702026
Control	GC046	FXBVK	FXBVK D20	200	0	0	Aspiny	0.0133184
Control	GC046	FXBVK	FXBVK D20	201	0	0	Aspiny	0.0212868
Control	GC046	FXBVK	FXBVK D20	202	0	0	Aspiny	0.0197788
Control	GC046	FXBVK	FXBVK D20	203	0	0	Aspiny	0.0273444
Control	GC046	FXBVK	FXBVK D20	204	0	0	Aspiny	0.0256489
Control	GC046	FXBVK	FXBVK D20	205	0	0	Aspiny	0.0191335
Control	GC046	FXBVK	FXBVK D20	206	1	1	Spiny	0.0202443
Control	GC046	FXBVK	FXBVK D20	207	1	1	Spiny	0.0176991
Control	GC046	FXBVK	FXBVK D20	208	1	1	Spiny	0.018619
Control	GC046	FXBVK	FXBVK D20	209	1	1	Spiny	0.0132639
Control	GC046	FXBVK	FXBVK D20	210	1	1	Spiny	0.0142916
Control	GC046	FXBVK	FXBVK D20	211	1	1	Spiny	0.00584078
Control	GC046	FXBVK	FXBVK D20	212	0	0	Aspiny	0.00420325
Control	GC046	FXBVK	FXBVK D20	213	0	0	Aspiny	0.0122503
Control	GC046	FXBVK	FXBVK D20	214	0	0	Aspiny	0.00462146
Control	GC046	FXBVK	FXBVK D20	215	0	0	Aspiny	0.00384887
Control	GC046	FXBVK	FXBVK D23	51	1	1	Spiny	0.00758203
Control	GC046	FXBVK	FXBVK D23	52	1	1	Spiny	0.0110752
Control	GC046	FXBVK	FXBVK D23	53	1	1	Spiny	0.0195399
Control	GC046	FXBVK	FXBVK D23	54	1	1	Spiny	0.0136063
Control	GC046	FXBVK	FXBVK D23	55	1	1	Spiny	0.0135538
Control	GC046	FXBVK	FXBVK D23	56	0	0	Aspiny	0.0154989
Control	GC046	FXBVK	FXBVK D23	57	0	0	Aspiny	0.00611021
Control	GC046	FXBVK	FXBVK D23	58	0	0	Aspiny	0.00332641
Control	GC046	FXBVK	FXBVK D23	59	0	0	Aspiny	0.0079713
Control	GC046	FXBVK	FXBVK D23	60	0	0	Aspiny	0.00894326
Control	GC046	FXBVK	FXBVK D23	61	0	0	Aspiny	0.00774955
Control	GC046	FXBVK	FXBVK D23	62	0	0	Aspiny	0.00693838
Control	GC046	FXBVK	FXBVK D23	63	0	0	Aspiny	0.00604254
Control	GC046	FXBVK	FXBVK D23	64	0	0	Aspiny	0.00417614
Control	GC046	FXBVK	FXBVK D23	65	0	0	Aspiny	0.00159583
Control	GC046	FXBVK	FXBVK D23	66	0	0	Aspiny	0.00407821
Control	GC046	FXBVK	FXBVK D23	67	0	0	Aspiny	0.00167784
Control	GC046	FXBVK	FXBVK D23	68	0	0	Aspiny	0.00392387
Control	GC046	FXBVK	FXBVK D23	69	0	0	Aspiny	0.00858784
Control	GC046	FXBVK	FXBVK D23	70	0	0	Aspiny	0.0128701
Control	GC046	FXBVK	FXBVK D23	71	0	0	Aspiny	0.00968347
Control	GC046	FXBVK	FXBVK D23	72	0	0	Aspiny	0.00182798
Control	GC046	FXBVK	FXBVK D23	73	0	0	Aspiny	0.00417023
Control	GC046	FXBVK	FXBVK D23	74	0	0	Aspiny	0.0144143
Control	GC046	FXBVK	FXBVK D23	75	0	0	Aspiny	0.0110243
Control	GC046	FXBVK	FXBVK D23	76	1	1	Spiny	0.00971621
Control	GC046	FXBVK	FXBVK D23	77	1	1	Spiny	0.00711297
Control	GC046	FXBVK	FXBVK D23	78	1	1	Spiny	0.00437861
Control	GC046	FXBVK	FXBVK D23	79	1	1	Spiny	0.00415199
Control	GC046	FXBVK	FXBVK D23	80	1	1	Spiny	0.00676953
Control	GC046	FXBVK	FXBVK D23	81	0	0	Aspiny	0.00557698
Control	GC046	FXBVK	FXBVK D23	82	0	0	Aspiny	0.00283432
Control	GC046	FXBVK	FXBVK D23	83	0	0	Aspiny	0.00102654
Control	GC046	FXBVK	FXBVK D23	84	0	0	Aspiny	0.000401862
Control	GC046	FXBVK	FXBVK D23	85	0	0	Aspiny	0.000303909
Control	GC046	FXBVK	FXBVK D23	86	0	0	Aspiny	0.000850018
Control	GC046	FXBVK	FXBVK D23	87	0	0	Aspiny	0.000399345
Control	GC046	FXBVK	FXBVK D23	88	0	0	Aspiny	0.000341052
Control	GC046	FXBVK	FXBVK D23	89	0	0	Aspiny	0.000575522
Control	GC046	FXBVK	FXBVK D23	90	0	0	Aspiny	0.000525078
Control	GC046	FXBVK	FXBVK D23	91	1	1	Spiny	0.00124242
Control	GC046	FXBVK	FXBVK D23	92	1	1	Spiny	0.0033043
Control	GC046	FXBVK	FXBVK D23	93	1	1	Spiny	0.00707002
Control	GC046	FXBVK	FXBVK D23	94	1	1	Spiny	0.00649708
Control	GC046	FXBVK	FXBVK D23	95	1	1	Spiny	0.0058551
Control	GC046	FXBVK	FXBVK D23	96	1	1	Spiny	0.00309749
Control	GC046	FXBVK	FXBVK D23	97	1	1	Spiny	0.00245838
Control	GC046	FXBVK	FXBVK D23	98	1	1	Spiny	0.00061856
Control	GC046	FXBVK	FXBVK D23	99	1	1	Spiny	0.00119955
Control	GC046	FXBVK	FXBVK D23	100	1	1	Spiny	0.000555477
Control	GC046	FXBVK	FXBVK D23	101	0	0	Aspiny	0.00102717
Control	GC046	FXBVK	FXBVK D23	102	0	0	Aspiny	0.0025047
Control	GC046	FXBVK	FXBVK D23	103	0	0	Aspiny	0.00167427
Control	GC046	FXBVK	FXBVK D23	104	0	0	Aspiny	0.000341853
Control	GC046	FXBVK	FXBVK D23	105	1	1	Spiny	0.000458152
Control	GC046	FXBVK	FXBVK D23	106	1	1	Spiny	0
Control	GC046	FXBVK	FXBVK D23	107	1	1	Spiny	0
Control	GC046	FXBVK	FXBVK D23	108	0	0	Aspiny	0
Control	GC046	FXBVK	FXBVK D23	109	0	0	Aspiny	0
Control	GC046	FXBVK	FXBVK D23	110	1	1	Spiny	0
Control	GC046	FXBVK	FXBVK D23	111	1	1	Spiny	0.000611039
Control	GC046	FXBVK	FXBVK D23	112	1	1	Spiny	0.00900282
Control	GC046	FXBVK	FXBVK D23	113	1	1	Spiny	0.00797416
Control	GC046	FXBVK	FXBVK D23	114	1	1	Spiny	0.00566802
Control	GC046	FXBVK	FXBVK D23	115	1	1	Spiny	0.00971565
Control	GC046	FXBVK	FXBVK D23	116	0	0	Aspiny	0.018436
Control	GC046	FXBVK	FXBVK D23	117	0	0	Aspiny	0.00895966
Control	GC046	FXBVK	FXBVK D23	118	0	0	Aspiny	0.0092516
Control	GC046	FXBVK	FXBVK D23	119	0	0	Aspiny	0.00578747
Control	GC046	FXBVK	FXBVK D23	120	0	0	Aspiny	0.0113954
Control	GC046	FXBVK	FXBVK D23	121	0	0	Aspiny	0.0106157
Control	GC046	FXBVK	FXBVK D23	122	0	0	Aspiny	0.016987
Control	GC046	FXBVK	FXBVK D23	123	0	0	Aspiny	0.012383
Control	GC046	FXBVK	FXBVK D23	124	0	0	Aspiny	0.00744253
Control	GC046	FXBVK	FXBVK D23	125	1	1	Spiny	0.00779926
Control	GC046	FXBVK	FXBVK D23	126	1	1	Spiny	0.00547267
Control	GC046	FXBVK	FXBVK D23	127	1	1	Spiny	0.00570449
Control	GC046	FXBVK	FXBVK D23	128	1	1	Spiny	0.00476848
Control	GC046	FXBVK	FXBVK D23	129	1	1	Spiny	0.000992476
Control	GC046	FXBVK	FXBVK D23	130	1	1	Spiny	0.00487682
Control	GC046	FXBVK	FXBVK D23	131	1	1	Spiny	0.00471904
Control	GC046	FXBVK	FXBVK D23	132	0	0	Aspiny	0.00508709
Control	GC046	FXBVK	FXBVK D23	133	0	0	Aspiny	0.00225424
Control	GC046	FXBVK	FXBVK D23	134	0	0	Aspiny	0.00376614
Control	GC046	FXBVK	FXBVK D23	135	1	1	Spiny	0.00533849
Control	GC046	FXBVK	FXBVK D23	136	1	1	Spiny	0.00664257
Control	GC046	FXBVK	FXBVK D23	137	1	1	Spiny	0.00529
Control	GC046	FXBVK	FXBVK D23	138	1	1	Spiny	0.0208097
Control	GC046	FXBVK	FXBVK D23	139	1	1	Spiny	0.0392958
Control	GC046	FXBVK	FXBVK D23	140	1	1	Spiny	0.0250028
Control	GC046	FXBVK	FXBVK D23	141	0	0	Aspiny	0.0110259
Control	GC046	FXBVK	FXBVK D23	142	0	0	Aspiny	0.00199457
Control	GC046	FXBVK	FXBVK D23	143	0	0	Aspiny	0.00256851
Control	GC046	FXBVK	FXBVK D23	144	0	0	Aspiny	0.00955764
Control	GC046	FXBVK	FXBVK D23	145	0	0	Aspiny	0.00732252
Control	GC046	FXBVK	FXBVK D23	146	0	0	Aspiny	0.00849644
Control	GC046	FXBVK	FXBVK D23	147	0	0	Aspiny	0.0045253
Control	GC046	FXBVK	FXBVK D23	148	0	0	Aspiny	0.000932225
Control	GC046	FXBVK	FXBVK D23	149	0	0	Aspiny	0.00427704
Control	GC046	FXBVK	FXBVK D23	150	0	0	Aspiny	0.00544797
Control	GC046	FXBVK	FXBVK D23	151	0	0	Aspiny	0.0122123
Control	GC046	FXBVK	FXBVK D23	152	0	0	Aspiny	0.0118216
Control	GC046	FXBVK	FXBVK D23	153	0	0	Aspiny	0.00935304
Control	GC046	FXBVK	FXBVK D23	154	0	0	Aspiny	0.00843751
Control	GC046	FXBVK	FXBVK D23	155	0	0	Aspiny	0.0071922
Control	GC046	FXBVK	FXBVK D23	156	0	0	Aspiny	0.00442101
Control	GC046	FXBVK	FXBVK D23	157	0	0	Aspiny	0.00618198
Control	GC046	FXBVK	FXBVK D23	158	1	1	Spiny	0.00509532
Control	GC046	FXBVK	FXBVK D23	159	1	1	Spiny	0.00551565
Control	GC046	FXBVK	FXBVK D23	160	1	1	Spiny	0.00707907
Control	GC046	FXBVK	FXBVK D23	161	1	1	Spiny	0.0167298
Control	GC046	FXBVK	FXBVK D23	162	0	0	Aspiny	0.0140852
Control	GC046	FXBVK	FXBVK D23	163	0	0	Aspiny	0.0159221
Control	GC046	FXBVK	FXBVK D23	164	0	0	Aspiny	0.0111574
Control	GC046	FXBVK	FXBVK D23	165	0	0	Aspiny	0.00587147
Control	GC046	FXBVK	FXBVK D23	166	0	0	Aspiny	0.0194307
Control	GC046	FXBVK	FXBVK D23	167	1	1	Spiny	0.0176591
Control	GC046	FXBVK	FXBVK D23	168	1	1	Spiny	0.0181193
Control	GC046	FXBVK	FXBVK D23	169	1	1	Spiny	0.0153836
Control	GC046	FXBVK	FXBVK D23	170	0	0	Aspiny	0.0222577
Control	GC046	FXBVK	FXBVK D23	171	0	0	Aspiny	0.00914959
Control	GC046	FXBVK	FXBVK D23	172	0	0	Aspiny	0.0110105
Control	GC046	FXBVK	FXBVK D23	173	0	0	Aspiny	0.0147667
Control	GC046	FXBVK	FXBVK D23	174	0	0	Aspiny	0.00744426
Control	GC046	FXBVK	FXBVK D23	175	0	0	Aspiny	0.00714245
Control	GC046	FXBVK	FXBVK D23	176	0	0	Aspiny	0.00328049
Control	GC046	FXBVK	FXBVK D23	177	0	0	Aspiny	0.00014152
Control	GC046	FXBVK	FXBVK D23	178	0	0	Aspiny	0.000242556
Control	GC046	FXBVK	FXBVK D23	179	0	0	Aspiny	0.000151254
Control	GC046	FXBVK	FXBVK D23	180	0	0	Aspiny	0.00809731
Control	GC046	FXBVK	FXBVK D23	181	0	0	Aspiny	0.00827665
Control	GC046	FXBVK	FXBVK D23	182	0	0	Aspiny	0.0124708
Control	GC046	FXBVK	FXBVK D23	183	0	0	Aspiny	0.0153151
Control	GC046	FXBVK	FXBVK D23	184	0	0	Aspiny	0.00952756
Control	GC046	FXBVK	FXBVK D23	185	0	0	Aspiny	0.0199124
Control	GC046	FXBVK	FXBVK D23	186	0	0	Aspiny	0.0230538
Control	GC046	FXBVK	FXBVK D23	187	0	0	Aspiny	0.00682653
Control	GC046	FXBVK	FXBVK D23	188	0	0	Aspiny	0.01519
Control	GC046	FXBVK	FXBVK D23	189	0	0	Aspiny	0.0109184
Control	GC046	FXBVK	FXBVK D23	190	0	0	Aspiny	0.00761037
Control	GC046	FXBVK	FXBVK D23	191	0	0	Aspiny	0.00876691
Control	GC046	FXBVK	FXBVK D23	192	0	0	Aspiny	0.00449743
Control	GC046	FXBVK	FXBVK D23	193	0	0	Aspiny	0.00332689
Control	GC046	FXBVK	FXBVK D23	194	0	0	Aspiny	0.00275228
Control	GC046	FXBVK	FXBVK D23	195	0	0	Aspiny	0.00215082
Control	GC046	FXBVK	FXBVK D23	196	0	0	Aspiny	0.00291487
Control	GC046	FXBVK	FXBVK D23	197	0	0	Aspiny	0.0076747
Control	GC046	FXBVK	FXBVK D23	198	0	0	Aspiny	0.00798306
Control	GC046	FXBVK	FXBVK D23	199	2	2	Spiny	0.0131379
Control	GC046	FXBVK	FXBVK D23	200	2	2	Spiny	0.0226908
Control	GC046	FXBVK	FXBVK D23	201	2	2	Spiny	0.0199112
Control	GC046	FXBVK	FXBVK D23	202	2	2	Spiny	0.0243081
Control	GC046	FXBVK	FXBVK D23	203	2	2	Spiny	0.0267067
Control	GC046	FXBVK	FXBVK D23	204	2	2	Spiny	0.0273706
Control	GC046	FXBVK	FXBVK D23	205	2	2	Spiny	0.0127005
Control	GC046	FXBVK	FXBVK D23	206	2	2	Spiny	0.0130117
Control	GC046	FXBVK	FXBVK D23	207	2	2	Spiny	0.02319
Control	GC046	FXBVK	FXBVK D23	208	2	2	Spiny	0.0255802
Control	GC046	FXBVK	FXBVK D23	209	2	2	Spiny	0.0180746
Control	GC046	FXBVK	FXBVK D23	210	2	2	Spiny	0.0292259
Control	GC046	FXBVK	FXBVK D23	211	0	0	Aspiny	0.017689
Control	GC046	FXBVK	FXBVK D23	212	0	0	Aspiny	0.0182947
Control	GC046	FXBVK	FXBVK D23	213	0	0	Aspiny	0.0139283
Control	GC046	FXBVK	FXBVK D23	214	0	0	Aspiny	0.00747829
Control	GC046	FXBVK	FXBVK D23	215	0	0	Aspiny	0.00586101
Control	GC046	FXBVK	FXBVK D23	216	0	0	Aspiny	0.00624856
Control	GC046	FXBVK	FXBVK D23	217	0	0	Aspiny	0.0068454
Control	GC046	FXBVK	FXBVK D61	41	3	3	Spiny	0.00174209
Control	GC046	FXBVK	FXBVK D61	42	3	3	Spiny	0.00228575
Control	GC046	FXBVK	FXBVK D61	43	3	3	Spiny	0.0186771
Control	GC046	FXBVK	FXBVK D61	44	3	3	Spiny	0.0146587
Control	GC046	FXBVK	FXBVK D61	45	3	3	Spiny	0.00450258
Control	GC046	FXBVK	FXBVK D61	46	3	3	Spiny	0.013858
Control	GC046	FXBVK	FXBVK D61	47	3	3	Spiny	0.00982825
Control	GC046	FXBVK	FXBVK D61	48	3	3	Spiny	0.0147313
Control	GC046	FXBVK	FXBVK D61	49	3	3	Spiny	0.0127417
Control	GC046	FXBVK	FXBVK D61	50	3	3	Spiny	0.0155807
Control	GC046	FXBVK	FXBVK D61	51	3	3	Spiny	0.0168678
Control	GC046	FXBVK	FXBVK D61	52	3	3	Spiny	0.015183
Control	GC046	FXBVK	FXBVK D61	53	0	0	Aspiny	0.0121322
Control	GC046	FXBVK	FXBVK D61	54	0	0	Aspiny	0.0159731
Control	GC046	FXBVK	FXBVK D61	55	0	0	Aspiny	0.0166007
Control	GC046	FXBVK	FXBVK D61	56	0	0	Aspiny	0.0250537
Control	GC046	FXBVK	FXBVK D61	57	0	0	Aspiny	0.0127344
Control	GC046	FXBVK	FXBVK D61	58	2	2	Spiny	0.010188
Control	GC046	FXBVK	FXBVK D61	59	2	2	Spiny	0.0100678
Control	GC046	FXBVK	FXBVK D61	60	2	2	Spiny	0.0246041
Control	GC046	FXBVK	FXBVK D61	61	2	2	Spiny	0.0237081
Control	GC046	FXBVK	FXBVK D61	62	2	2	Spiny	0.0227216
Control	GC046	FXBVK	FXBVK D61	63	2	2	Spiny	0.0180428
Control	GC046	FXBVK	FXBVK D61	64	0	0	Aspiny	0.019923
Control	GC046	FXBVK	FXBVK D61	65	0	0	Aspiny	0.0232528
Control	GC046	FXBVK	FXBVK D61	66	0	0	Aspiny	0.0186556
Control	GC046	FXBVK	FXBVK D61	67	0	0	Aspiny	0.0147361
Control	GC046	FXBVK	FXBVK D61	68	0	0	Aspiny	0.0165696
Control	GC046	FXBVK	FXBVK D61	69	0	0	Aspiny	0.00809974
Control	GC046	FXBVK	FXBVK D61	70	0	0	Aspiny	0.010272
Control	GC046	FXBVK	FXBVK D61	71	0	0	Aspiny	0.00528777
Control	GC046	FXBVK	FXBVK D61	72	0	0	Aspiny	0.00506907
Control	GC046	FXBVK	FXBVK D61	73	0	0	Aspiny	0.00503322
Control	GC046	FXBVK	FXBVK D61	74	0	0	Aspiny	0.0057034
Control	GC046	FXBVK	FXBVK D61	75	1	1	Spiny	0.00571426
Control	GC046	FXBVK	FXBVK D61	76	1	1	Spiny	0.00624637
Control	GC046	FXBVK	FXBVK D61	77	1	1	Spiny	0.00484634
Control	GC046	FXBVK	FXBVK D61	78	1	1	Spiny	0.00293954
Control	GC046	FXBVK	FXBVK D61	79	1	1	Spiny	0.00769857
Control	GC046	FXBVK	FXBVK D61	80	1	1	Spiny	0.00568963
Control	GC046	FXBVK	FXBVK D61	81	0	0	Aspiny	0.00466349
Control	GC046	FXBVK	FXBVK D61	82	0	0	Aspiny	0.00849734
Control	GC046	FXBVK	FXBVK D61	83	0	0	Aspiny	0.0102205
Control	GC046	FXBVK	FXBVK D61	84	0	0	Aspiny	0.00775079
Control	GC046	FXBVK	FXBVK D61	85	0	0	Aspiny	0.00852889
Control	GC046	FXBVK	FXBVK D61	86	0	0	Aspiny	0.00801478
Control	GC046	FXBVK	FXBVK D61	87	0	0	Aspiny	0.00627473
Control	GC046	FXBVK	FXBVK D61	88	0	0	Aspiny	0.00528584
Control	GC046	FXBVK	FXBVK D61	89	0	0	Aspiny	0.00461993
Control	GC046	FXBVK	FXBVK D61	90	0	0	Aspiny	0.00540722
Control	GC046	FXBVK	FXBVK D61	91	1	1	Spiny	0.00870486
Control	GC046	FXBVK	FXBVK D61	92	1	1	Spiny	0.00961812
Control	GC046	FXBVK	FXBVK D61	93	1	1	Spiny	0.0139234
Control	GC046	FXBVK	FXBVK D61	94	1	1	Spiny	0.0098418
Control	GC046	FXBVK	FXBVK D61	95	1	1	Spiny	0.00363699
Control	GC046	FXBVK	FXBVK D61	96	0	0	Aspiny	0.00255693
Control	GC046	FXBVK	FXBVK D61	97	0	0	Aspiny	0.00191354
Control	GC046	FXBVK	FXBVK D61	98	0	0	Aspiny	0.00168123
Control	GC046	FXBVK	FXBVK D61	99	0	0	Aspiny	0.000367264
Control	GC046	FXBVK	FXBVK D61	100	0	0	Aspiny	0.000359712
Control	GC046	FXBVK	FXBVK D61	101	0	0	Aspiny	0.000270297
Control	GC046	FXBVK	FXBVK D61	102	0	0	Aspiny	0.000988658
Control	GC046	FXBVK	FXBVK D61	103	0	0	Aspiny	0.00192
Control	GC046	FXBVK	FXBVK D61	104	0	0	Aspiny	0.00300454
Control	GC046	FXBVK	FXBVK D61	105	0	0	Aspiny	0.0026144
Control	GC046	FXBVK	FXBVK D61	106	0	0	Aspiny	0.00125555
Control	GC046	FXBVK	FXBVK D61	107	0	0	Aspiny	0.00418615
Control	GC046	FXBVK	FXBVK D61	108	0	0	Aspiny	0.00504168
Control	GC046	FXBVK	FXBVK D61	109	0	0	Aspiny	0.0104115
Control	GC046	FXBVK	FXBVK D61	110	0	0	Aspiny	0.00886053
Control	GC046	FXBVK	FXBVK D61	111	0	0	Aspiny	0.00819145
Control	GC046	FXBVK	FXBVK D61	112	0	0	Aspiny	0.0113348
Control	GC046	FXBVK	FXBVK D61	113	0	0	Aspiny	0.00585231
Control	GC046	FXBVK	FXBVK D61	114	0	0	Aspiny	0.00200086
Control	GC046	FXBVK	FXBVK D61	115	1	1	Spiny	0.00541556
Control	GC046	FXBVK	FXBVK D61	116	1	1	Spiny	0.00207298
Control	GC046	FXBVK	FXBVK D61	117	1	1	Spiny	0.00165316
Control	GC046	FXBVK	FXBVK D61	118	1	1	Spiny	0.00690988
Control	GC046	FXBVK	FXBVK D61	119	1	1	Spiny	0.00684388
Control	GC046	FXBVK	FXBVK D61	120	1	1	Spiny	0.0135122
Control	GC046	FXBVK	FXBVK D61	121	1	1	Spiny	0.00842031
Control	GC046	FXBVK	FXBVK D61	122	1	1	Spiny	0.00962116
Control	GC046	FXBVK	FXBVK D61	123	0	0	Aspiny	0.0214939
Control	GC046	FXBVK	FXBVK D61	124	0	0	Aspiny	0.0243997
Control	GC046	FXBVK	FXBVK D61	125	1	1	Spiny	0.0183407
Control	GC046	FXBVK	FXBVK D61	126	1	1	Spiny	0.0154015
Control	GC046	FXBVK	FXBVK D61	127	1	1	Spiny	0.00755214
Control	GC046	FXBVK	FXBVK D61	128	0	0	Aspiny	0.00861627
Control	GC046	FXBVK	FXBVK D61	129	0	0	Aspiny	0.00792581
Control	GC046	FXBVK	FXBVK D61	130	0	0	Aspiny	0.0125924
Control	GC046	FXBVK	FXBVK D61	131	0	0	Aspiny	0.0173862
Control	GC046	FXBVK	FXBVK D61	132	1	1	Spiny	0.00646645
Control	GC046	FXBVK	FXBVK D61	133	1	1	Spiny	0.00245693
Control	GC046	FXBVK	FXBVK D61	134	1	1	Spiny	0.00468468
Control	GC046	FXBVK	FXBVK D61	135	1	1	Spiny	0.00655762
Control	GC046	FXBVK	FXBVK D61	136	1	1	Spiny	0.00387501
Control	GC046	FXBVK	FXBVK D61	137	1	1	Spiny	0.00659052
Control	GC046	FXBVK	FXBVK D61	138	1	1	Spiny	0.0020044
Control	GC046	FXBVK	FXBVK D61	139	1	1	Spiny	0.00703007
Control	GC046	FXBVK	FXBVK D61	140	1	1	Spiny	0.00312035
Control	GC046	FXBVK	FXBVK D61	141	0	0	Aspiny	0.00120752
Control	GC046	FXBVK	FXBVK D61	142	0	0	Aspiny	0.00119734
Control	GC046	FXBVK	FXBVK D61	143	0	0	Aspiny	0.00243647
Control	GC046	FXBVK	FXBVK D61	144	0	0	Aspiny	0.000990323
Control	GC046	FXBVK	FXBVK D61	145	0	0	Aspiny	0.000906658
Control	GC046	FXBVK	FXBVK D61	146	0	0	Aspiny	0.00106296
Control	GC046	FXBVK	FXBVK D61	147	0	0	Aspiny	0.00268062
Control	GC046	FXBVK	FXBVK D61	148	0	0	Aspiny	0.0016329
Control	GC046	FXBVK	FXBVK D61	149	0	0	Aspiny	0.00632578
Control	GC046	FXBVK	FXBVK D61	150	0	0	Aspiny	0.0109266
Control	GC046	FXBVK	FXBVK D61	151	0	0	Aspiny	0.00400568
Control	GC046	FXBVK	FXBVK D61	152	0	0	Aspiny	0.0105622
Control	GC046	FXBVK	FXBVK D61	153	1	1	Spiny	0.00946446
Control	GC046	FXBVK	FXBVK D61	154	1	1	Spiny	0.00581275
Control	GC046	FXBVK	FXBVK D61	155	1	1	Spiny	0.0107752
Control	GC046	FXBVK	FXBVK D61	156	0	0	Aspiny	0.00503747
Control	GC046	FXBVK	FXBVK D61	157	0	0	Aspiny	0.0051253
Control	GC046	FXBVK	FXBVK D61	158	0	0	Aspiny	0.00382063
Control	GC046	FXBVK	FXBVK D61	159	0	0	Aspiny	0.00961458
Control	GC046	FXBVK	FXBVK D61	160	0	0	Aspiny	0.0110098
Control	GC046	FXBVK	FXBVK D61	161	0	0	Aspiny	0.0150487
Control	GC046	FXBVK	FXBVK D61	164	1	1	Spiny	0.00753507
Control	GC046	FXBVK	FXBVK D61	165	1	1	Spiny	0.0140806
Control	GC046	FXBVK	FXBVK D61	166	0	0	Aspiny	0.0059767
Control	GC046	FXBVK	FXBVK D61	167	0	0	Aspiny	0.00434167
Control	GC046	FXBVK	FXBVK D61	168	0	0	Aspiny	0.00407661
Control	GC046	FXBVK	FXBVK D61	169	0	0	Aspiny	0.0020266
Control	GC046	FXBVK	FXBVK D61	170	0	0	Aspiny	0.012008
Control	GC046	FXBVK	FXBVK D61	171	1	1	Spiny	0.0161236
Control	GC046	FXBVK	FXBVK D61	172	1	1	Spiny	0.0208533
Control	GC046	FXBVK	FXBVK D61	173	1	1	Spiny	0.010415
Control	GC046	FXBVK	FXBVK D61	174	1	1	Spiny	0.00731352
Control	GC046	FXBVK	FXBVK D61	175	1	1	Spiny	0.000732711
Control	GC046	FXBVK	FXBVK D61	176	0	0	Aspiny	0.00126912
Control	GC046	FXBVK	FXBVK D61	177	0	0	Aspiny	0
Control	GC046	FXBVK	FXBVK D61	178	0	0	Aspiny	0
Control	GC046	FXBVK	FXBVK D61	179	0	0	Aspiny	0
Control	GC046	FXBVK	FXBVK D61	180	0	0	Aspiny	0.010186
Control	GC046	FXBVK	FXBVK D61	181	0	0	Aspiny	0.0140613
Control	GC046	FXBVK	FXBVK D61	182	0	0	Aspiny	0.0196317
Control	GC046	FXBVK	FXBVK D61	183	1	1	Spiny	0.0179336
Control	GC046	FXBVK	FXBVK D61	189	1	1	Spiny	0.0096093
Control	GC046	FXBVK	FXBVK D61	190	1	1	Spiny	0.00649265
Control	GC046	FXBVK	FXBVK D61	191	1	1	Spiny	0.00258459
Control	GC046	FXBVK	FXBVK D61	192	1	1	Spiny	0.00860796
Control	GC046	FXBVK	FXBVK D61	193	1	1	Spiny	0.00921585
Control	GC046	FXBVK	FXBVK D61	194	1	1	Spiny	0.00429861
Control	GC046	FXBVK	FXBVK D61	195	1	1	Spiny	0.0104255
Control	GC046	FXBVK	FXBVK D61	196	1	1	Spiny	0.00783715
Control	GC046	FXBVK	FXBVK D61	197	1	1	Spiny	0.00752728
Control	GC046	FXBVK	FXBVK D61	198	1	1	Spiny	0.0114771
Control	GC046	FXBVK	FXBVK D61	199	1	1	Spiny	0.00744937
Control	GC046	FXBVK	FXBVK D61	200	1	1	Spiny	0.0146689
Control	GC046	FXBVK	FXBVK D61	201	1	1	Spiny	0.0262208
Control	GC046	FXBVK	FXBVK D61	202	0	0	Aspiny	0.0101394
Control	GC046	FXBVK	FXBVK D61	203	0	0	Aspiny	0.00894818
Control	GC046	FXBVK	FXBVK D61	204	0	0	Aspiny	0.0150368
Control	GC046	FXBVK	FXBVK D61	205	0	0	Aspiny	0.0100911
Control	GC046	FXBVK	FXBVK D61	206	0	0	Aspiny	0.00991704
Control	GC046	FXBVK	FXBVK D61	207	0	0	Aspiny	0.000351764
Control	GC046	FXBVK	FXBVK D61	208	0	0	Aspiny	0.00696573
Control	GC046	FXBVK	FXBVK D61	209	0	0	Aspiny	0.00759682
Control	GC046	FXBVK	FXBVK D61	210	0	0	Aspiny	0.00519858
Control	GC046	FXBVK	FXBVK D61	211	0	0	Aspiny	0.0119968
Control	GC046	FXBVK	FXBVK D61	212	0	0	Aspiny	0.0263882
Control	GC046	FXBVK	FXBVK D61	213	0	0	Aspiny	0.0178119
Control	GC046	FXBVK	FXBVK D69	1	0	0	Aspiny	0.0310092
Control	GC046	FXBVK	FXBVK D69	2	0	0	Aspiny	0.013721
Control	GC046	FXBVK	FXBVK D69	3	3	4	Spiny	0.013021
Control	GC046	FXBVK	FXBVK D69	4	3	4	Spiny	0.0043339
Control	GC046	FXBVK	FXBVK D69	5	3	4	Spiny	0.00295609
Control	GC046	FXBVK	FXBVK D69	6	3	4	Spiny	0.00598558
Control	GC046	FXBVK	FXBVK D69	7	3	4	Spiny	0.0151314
Control	GC046	FXBVK	FXBVK D69	9	3	4	Spiny	0.00927476
Control	GC046	FXBVK	FXBVK D69	10	3	4	Spiny	0.0167103
Control	GC046	FXBVK	FXBVK D69	11	0	0	Aspiny	0.0168164
Control	GC046	FXBVK	FXBVK D69	12	0	0	Aspiny	0.00649151
Control	GC046	FXBVK	FXBVK D69	13	0	0	Aspiny	0.00976166
Control	GC046	FXBVK	FXBVK D69	14	0	0	Aspiny	0.00722291
Control	GC046	FXBVK	FXBVK D69	15	0	0	Aspiny	0.0106171
Control	GC046	FXBVK	FXBVK D69	16	0	0	Aspiny	0.013255
Control	GC046	FXBVK	FXBVK D69	17	0	0	Aspiny	0.0147336
Control	GC046	FXBVK	FXBVK D69	18	0	0	Aspiny	0.0084404
Control	GC046	FXBVK	FXBVK D69	19	0	0	Aspiny	0.00430944
Control	GC046	FXBVK	FXBVK D69	20	0	0	Aspiny	0.00023026
Control	GC046	FXBVK	FXBVK D69	21	0	0	Aspiny	4.40454e-05
Control	GC046	FXBVK	FXBVK D69	22	0	0	Aspiny	6.76898e-05
Control	GC046	FXBVK	FXBVK D69	23	0	0	Aspiny	0
Control	GC046	FXBVK	FXBVK D69	24	0	0	Aspiny	0
Control	GC046	FXBVK	FXBVK D69	25	0	0	Aspiny	0
Control	GC046	FXBVK	FXBVK D69	26	0	0	Aspiny	0.00332344
Control	GC046	FXBVK	FXBVK D69	27	0	0	Aspiny	0.00523026
Control	GC046	FXBVK	FXBVK D69	28	0	0	Aspiny	0.00401636
Control	GC046	FXBVK	FXBVK D69	29	0	0	Aspiny	0.0040723
Control	GC046	FXBVK	FXBVK D69	30	0	0	Aspiny	0.027831
Control	GC046	FXBVK	FXBVK D69	31	3	4	Spiny	0.0348759
Control	GC046	FXBVK	FXBVK D69	32	3	4	Spiny	0.0253162
Control	GC046	FXBVK	FXBVK D69	33	3	4	Spiny	0.01478
Control	GC046	FXBVK	FXBVK D69	34	3	4	Spiny	0.00335733
Control	GC046	FXBVK	FXBVK D69	40	3	4	Spiny	0
Control	GC046	FXBVK	FXBVK D69	41	0	0	Aspiny	0
Control	GC046	FXBVK	FXBVK D69	42	0	0	Aspiny	0.00375151
Control	GC046	FXBVK	FXBVK D69	43	0	0	Aspiny	0.0157824
Control	GC046	FXBVK	FXBVK D69	44	0	0	Aspiny	0.0251582
Control	GC046	FXBVK	FXBVK D69	45	0	0	Aspiny	0.0317164
Control	GC046	FXBVK	FXBVK D69	46	0	0	Aspiny	0.0288676
Control	GC046	FXBVK	FXBVK D69	47	0	0	Aspiny	0.0133936
Control	GC046	FXBVK	FXBVK D69	48	0	0	Aspiny	0.0145208
Control	GC046	FXBVK	FXBVK D69	49	1	1	Spiny	0.0115949
Control	GC046	FXBVK	FXBVK D69	50	1	1	Spiny	0.0108497
Control	GC046	FXBVK	FXBVK D69	51	1	1	Spiny	0.00633433
Control	GC046	FXBVK	FXBVK D69	52	1	1	Spiny	0.00605785
Control	GC046	FXBVK	FXBVK D69	53	0	0	Aspiny	0.014746
Control	GC046	FXBVK	FXBVK D69	54	0	0	Aspiny	0.00162813
Control	GC046	FXBVK	FXBVK D69	55	0	0	Aspiny	0.00902423
Control	GC046	FXBVK	FXBVK D69	56	0	0	Aspiny	0.00502735
Control	GC046	FXBVK	FXBVK D69	57	0	0	Aspiny	0.0242779
Control	GC046	FXBVK	FXBVK D69	58	0	0	Aspiny	0.033211
Control	GC046	FXBVK	FXBVK D69	59	0	0	Aspiny	0.0376801
Control	GC046	FXBVK	FXBVK D69	60	0	0	Aspiny	0.0286294
Control	GC046	FXBVK	FXBVK D69	61	0	0	Aspiny	0.0239957
Control	GC046	FXBVK	FXBVK D69	62	0	0	Aspiny	0.00930265
Control	GC046	FXBVK	FXBVK D69	63	0	0	Aspiny	0
Control	GC046	FXBVK	FXBVK D69	64	0	0	Aspiny	0
Control	GC046	FXBVK	FXBVK D69	65	0	0	Aspiny	0.0031758
Control	GC046	FXBVK	FXBVK D69	66	0	0	Aspiny	0.00428666
Control	GC046	FXBVK	FXBVK D69	67	0	0	Aspiny	0.00107963
Control	GC046	FXBVK	FXBVK D69	68	0	0	Aspiny	0.000557742
Control	GC046	FXBVK	FXBVK D69	69	0	0	Aspiny	0.00544733
Control	GC046	FXBVK	FXBVK D69	70	0	0	Aspiny	0.00915248
Control	GC046	FXBVK	FXBVK D69	71	0	0	Aspiny	0.00858984
Control	GC046	FXBVK	FXBVK D69	72	0	0	Aspiny	0.00116091
Control	GC046	FXBVK	FXBVK D69	73	1	2	Spiny	0.0218719
Control	GC046	FXBVK	FXBVK D69	74	1	2	Spiny	0.0221595
Control	GC046	FXBVK	FXBVK D69	75	1	2	Spiny	0.0205189
Control	GC046	FXBVK	FXBVK D69	76	0	0	Aspiny	0.0144514
Control	GC046	FXBVK	FXBVK D69	77	0	0	Aspiny	0.0148622
Control	GC046	FXBVK	FXBVK D69	78	0	0	Aspiny	0.007235
Control	GC046	FXBVK	FXBVK D69	79	0	0	Aspiny	0.000289332
Control	GC046	FXBVK	FXBVK D69	80	0	0	Aspiny	0.0108615
Control	GC046	FXBVK	FXBVK D69	81	0	0	Aspiny	0.010823
Control	GC046	FXBVK	FXBVK D69	82	0	0	Aspiny	0.0016257
Control	GC046	FXBVK	FXBVK D69	83	0	0	Aspiny	0
Control	GC046	FXBVK	FXBVK D69	84	0	0	Aspiny	0
Control	GC046	FXBVK	FXBVK D69	85	0	0	Aspiny	0
Control	GC046	FXBVK	FXBVK D69	86	0	0	Aspiny	0
Control	GC046	FXBVK	FXBVK D69	87	0	0	Aspiny	0
Control	GC046	FXBVK	FXBVK D69	88	0	0	Aspiny	0
Control	GC046	FXBVK	FXBVK D69	89	1	1	Spiny	0.00692962
Control	GC046	FXBVK	FXBVK D69	90	1	1	Spiny	0.0234467
Control	GC046	FXBVK	FXBVK D69	91	1	1	Spiny	0.030371
Control	GC046	FXBVK	FXBVK D69	92	1	1	Spiny	0.0246332
Control	GC046	FXBVK	FXBVK D69	93	1	1	Spiny	0.0152963
Control	GC046	FXBVK	FXBVK D69	94	0	0	Aspiny	0.00545234
Control	GC046	FXBVK	FXBVK D69	95	0	0	Aspiny	0.000903164
Control	GC046	FXBVK	FXBVK D69	96	1	1	Spiny	0.000832433
Control	GC046	FXBVK	FXBVK D69	97	1	1	Spiny	0.00215336
Control	GC046	FXBVK	FXBVK D69	98	1	1	Spiny	0.00493544
Control	GC046	FXBVK	FXBVK D69	99	1	1	Spiny	0.00650952
Control	GC046	FXBVK	FXBVK D69	100	1	1	Spiny	0.00513166
Control	GC046	FXBVK	FXBVK D69	101	1	1	Spiny	0.00628684
Control	GC046	FXBVK	FXBVK D69	102	1	1	Spiny	0.0119215
Control	GC046	FXBVK	FXBVK D69	103	0	0	Aspiny	0.00522873
Control	GC046	FXBVK	FXBVK D69	104	0	0	Aspiny	0.00646344
Control	GC046	FXBVK	FXBVK D69	105	0	0	Aspiny	0.00661922
Control	GC046	FXBVK	FXBVK D69	106	0	0	Aspiny	0.000510882
Control	GC046	FXBVK	FXBVK D69	107	0	0	Aspiny	0.000929945
Control	GC046	FXBVK	FXBVK D69	108	0	0	Aspiny	0.000701371
Control	GC046	FXBVK	FXBVK D69	109	0	0	Aspiny	0.000763229
Control	GC046	FXBVK	FXBVK D69	110	0	0	Aspiny	0.000773066
Control	GC046	FXBVK	FXBVK D69	111	0	0	Aspiny	0.00102475
Control	GC046	FXBVK	FXBVK D69	112	0	0	Aspiny	0.000891742
Control	GC046	FXBVK	FXBVK D69	113	1	1	Spiny	0.000946242
Control	GC046	FXBVK	FXBVK D69	114	1	1	Spiny	0.000936083
Control	GC046	FXBVK	FXBVK D69	115	1	1	Spiny	0.00116309
Control	GC046	FXBVK	FXBVK D69	116	1	1	Spiny	0.00486456
Control	GC046	FXBVK	FXBVK D69	117	1	1	Spiny	0.00778447
Control	GC046	FXBVK	FXBVK D69	118	1	1	Spiny	0.00907529
Control	GC046	FXBVK	FXBVK D69	119	1	1	Spiny	0.00766041
Control	GC046	FXBVK	FXBVK D69	120	0	0	Aspiny	0.0141757
Control	GC046	FXBVK	FXBVK D69	121	0	0	Aspiny	0.00521549
Control	GC046	FXBVK	FXBVK D69	122	0	0	Aspiny	0.00549103
Control	GC046	FXBVK	FXBVK D69	123	0	0	Aspiny	0.00367392
Control	GC046	FXBVK	FXBVK D69	124	1	1	Spiny	0.00338899
Control	GC046	FXBVK	FXBVK D69	125	1	1	Spiny	0.00685013
Control	GC046	FXBVK	FXBVK D69	126	1	1	Spiny	0.0132156
Control	GC046	FXBVK	FXBVK D69	127	1	1	Spiny	0.0133318
Control	GC046	FXBVK	FXBVK D69	128	1	1	Spiny	0.00522836
Control	GC046	FXBVK	FXBVK D69	129	1	1	Spiny	0.000761551
Control	GC046	FXBVK	FXBVK D69	130	0	0	Aspiny	0.00279759
Control	GC046	FXBVK	FXBVK D69	131	0	0	Aspiny	0.00270191
Control	GC046	FXBVK	FXBVK D69	132	0	0	Aspiny	0.00987356
Control	GC046	FXBVK	FXBVK D69	133	0	0	Aspiny	0.00402488
Control	GC046	FXBVK	FXBVK D69	134	0	0	Aspiny	0.00341091
Control	GC046	FXBVK	FXBVK D69	135	0	0	Aspiny	0.000781879
Control	GC046	FXBVK	FXBVK D69	136	0	0	Aspiny	0.00114153
Control	GC046	FXBVK	FXBVK D69	137	0	0	Aspiny	0.00405966
Control	GC046	FXBVK	FXBVK D69	138	0	0	Aspiny	0.0171147
Control	GC046	FXBVK	FXBVK D69	139	1	1	Spiny	0.0176659
Control	GC046	FXBVK	FXBVK D69	140	1	1	Spiny	0.0189323
Control	GC046	FXBVK	FXBVK D69	141	1	1	Spiny	0.0212267
Control	GC046	FXBVK	FXBVK D69	142	0	0	Aspiny	0.00959126
Control	GC046	FXBVK	FXBVK D69	143	0	0	Aspiny	0.00767638
Control	GC046	FXBVK	FXBVK D69	144	0	0	Aspiny	0.00144295
Control	GC046	FXBVK	FXBVK D69	145	0	0	Aspiny	0.00312733
Control	GC046	FXBVK	FXBVK D69	146	0	0	Aspiny	0.000161664
Control	GC046	FXBVK	FXBVK D69	147	0	0	Aspiny	0.000787005
Control	GC046	FXBVK	FXBVK D69	148	0	0	Aspiny	0.000638608
Control	GC046	FXBVK	FXBVK D69	149	0	0	Aspiny	0.00910611
Control	GC046	FXBVK	FXBVK D69	150	0	0	Aspiny	0.0204964
Control	GC046	FXBVK	FXBVK D69	151	1	1	Spiny	0.0172208
Control	GC046	FXBVK	FXBVK D69	152	1	1	Spiny	0.00691718
Control	GC046	FXBVK	FXBVK D69	153	1	1	Spiny	0.00141794
Control	GC046	FXBVK	FXBVK D69	154	1	1	Spiny	0.00100283
Control	GC046	FXBVK	FXBVK D69	155	0	0	Aspiny	0.000404916
Control	GC046	FXBVK	FXBVK D69	156	0	0	Aspiny	0.000248446
Control	GC046	FXBVK	FXBVK D69	157	0	0	Aspiny	0.000348191
Control	GC046	FXBVK	FXBVK D69	158	0	0	Aspiny	0.000199729
Control	GC046	FXBVK	FXBVK D69	159	0	0	Aspiny	0.000326672
Control	GC046	FXBVK	FXBVK D69	160	0	0	Aspiny	0.000621865
Control	GC046	FXBVK	FXBVK D69	161	0	0	Aspiny	0.000220413
Control	GC046	FXBVK	FXBVK D69	162	0	0	Aspiny	0.000318074
Control	GC046	FXBVK	FXBVK D69	163	0	0	Aspiny	0.00113108
Control	GC046	FXBVK	FXBVK D69	164	0	0	Aspiny	0.00253595
Control	GC046	FXBVK	FXBVK D69	165	0	0	Aspiny	0.00539983
Control	GC046	FXBVK	FXBVK D69	166	1	1	Spiny	0.004359
Control	GC046	FXBVK	FXBVK D69	167	1	1	Spiny	0.00263233
Control	GC046	FXBVK	FXBVK D69	168	1	1	Spiny	0.00124066
Control	GC046	FXBVK	FXBVK D69	169	0	0	Aspiny	0.00151985
Control	GC046	FXBVK	FXBVK D69	170	0	0	Aspiny	0.000916627
Control	GC046	FXBVK	FXBVK D69	171	0	0	Aspiny	0.00398976
Control	GC046	FXBVK	FXBVK D69	172	0	0	Aspiny	0.000545102
Control	GC046	FXBVK	FXBVK D69	173	0	0	Aspiny	0.000372432
Control	GC046	FXBVK	FXBVK D69	174	1	1	Spiny	0.000324072
Control	GC046	FXBVK	FXBVK D69	175	1	1	Spiny	0.000273092
Control	GC046	FXBVK	FXBVK D69	176	1	1	Spiny	0.000722201
Control	GC046	FXBVK	FXBVK D69	177	1	1	Spiny	0.00104664
Control	GC046	FXBVK	FXBVK D69	178	0	0	Aspiny	0.00429074
Control	GC046	FXBVK	FXBVK D69	179	0	0	Aspiny	0.00887695
Control	GC046	FXBVK	FXBVK D69	180	0	0	Aspiny	0.00977439
Control	GC046	FXBVK	FXBVK D69	181	0	0	Aspiny	0.00899552
Control	GC046	FXBVK	FXBVK D69	182	0	0	Aspiny	0.0088299
Control	GC046	FXBVK	FXBVK D69	183	0	0	Aspiny	0.013245
Control	GC046	FXBVK	FXBVK D69	184	0	0	Aspiny	0.0205983
Control	GC046	FXBVK	FXBVK D69	185	0	0	Aspiny	0.0315629
Control	GC046	FXBVK	FXBVK D69	186	0	0	Aspiny	0.013274
Control	GC046	FXBVK	FXBVK D69	187	0	0	Aspiny	0.0117897
Control	GC046	FXBVK	FXBVK D69	188	0	0	Aspiny	0.012162
Control	GC046	FXBVK	FXBVK D69	189	0	0	Aspiny	0.00428152
Control	GC046	FXBVK	FXBVK D69	190	0	0	Aspiny	0.00515972
Control	GC046	FXBVK	FXBVK D69	191	0	0	Aspiny	0.00609716
Control	GC046	FXBVK	FXBVK D69	192	0	0	Aspiny	0.00540474
Control	GC046	FXBVK	FXBVK D69	193	0	0	Aspiny	0.00467735
Control	GC046	FXBVK	FXBVK D69	194	1	1	Spiny	0.00526879
Control	GC046	FXBVK	FXBVK D69	195	1	1	Spiny	0.00315534
Control	GC046	FXBVK	FXBVK D69	196	1	1	Spiny	0.00688106
Control	GC046	FXBVK	FXBVK D69	197	1	1	Spiny	0.00576676
Control	GC046	FXBVK	FXBVK D69	198	1	1	Spiny	0.00670218
Control	GC048	PWCNZ	PWCNZ D07	7	0	0	Aspiny	0.0140353
Control	GC048	PWCNZ	PWCNZ D07	8	0	0	Aspiny	0.0137381
Control	GC048	PWCNZ	PWCNZ D07	9	0	0	Aspiny	0.00965665
Control	GC048	PWCNZ	PWCNZ D07	10	0	0	Aspiny	0.0126589
Control	GC048	PWCNZ	PWCNZ D07	11	0	0	Aspiny	0.00880133
Control	GC048	PWCNZ	PWCNZ D07	12	0	0	Aspiny	0.0092231
Control	GC048	PWCNZ	PWCNZ D07	13	0	0	Aspiny	0.0103374
Control	GC048	PWCNZ	PWCNZ D07	14	0	0	Aspiny	0.00649295
Control	GC048	PWCNZ	PWCNZ D07	15	0	0	Aspiny	0.00508059
Control	GC048	PWCNZ	PWCNZ D07	16	0	0	Aspiny	0.0101206
Control	GC048	PWCNZ	PWCNZ D07	17	0	0	Aspiny	0.00422599
Control	GC048	PWCNZ	PWCNZ D07	18	0	0	Aspiny	0.00683809
Control	GC048	PWCNZ	PWCNZ D07	19	0	0	Aspiny	0.0037088
Control	GC048	PWCNZ	PWCNZ D07	20	0	0	Aspiny	0.0105877
Control	GC048	PWCNZ	PWCNZ D07	21	0	0	Aspiny	0
Control	GC048	PWCNZ	PWCNZ D07	22	0	0	Aspiny	0.0106085
Control	GC048	PWCNZ	PWCNZ D07	23	0	0	Aspiny	0.0245096
Control	GC048	PWCNZ	PWCNZ D07	24	0	0	Aspiny	0.0233484
Control	GC048	PWCNZ	PWCNZ D07	25	0	0	Aspiny	0.0236042
Control	GC048	PWCNZ	PWCNZ D07	26	0	0	Aspiny	0.00985111
Control	GC048	PWCNZ	PWCNZ D07	27	0	0	Aspiny	0.00846939
Control	GC048	PWCNZ	PWCNZ D07	28	0	0	Aspiny	0.00988677
Control	GC048	PWCNZ	PWCNZ D07	29	0	0	Aspiny	0.0103166
Control	GC048	PWCNZ	PWCNZ D07	30	0	0	Aspiny	0.00544994
Control	GC048	PWCNZ	PWCNZ D07	31	0	0	Aspiny	0.0125126
Control	GC048	PWCNZ	PWCNZ D07	32	0	0	Aspiny	0.0124961
Control	GC048	PWCNZ	PWCNZ D07	33	0	0	Aspiny	0.0141872
Control	GC048	PWCNZ	PWCNZ D07	34	0	0	Aspiny	0.0143663
Control	GC048	PWCNZ	PWCNZ D07	35	0	0	Aspiny	0.00508411
Control	GC048	PWCNZ	PWCNZ D07	36	0	0	Aspiny	0.0128105
Control	GC048	PWCNZ	PWCNZ D07	37	0	0	Aspiny	0.0220732
Control	GC048	PWCNZ	PWCNZ D07	38	0	0	Aspiny	0.0179913
Control	GC048	PWCNZ	PWCNZ D07	39	1	1	Spiny	0.0148796
Control	GC048	PWCNZ	PWCNZ D07	40	1	1	Spiny	0.0117404
Control	GC048	PWCNZ	PWCNZ D07	41	1	1	Spiny	0.00325148
Control	GC048	PWCNZ	PWCNZ D07	42	0	0	Aspiny	0.00444561
Control	GC048	PWCNZ	PWCNZ D07	43	0	0	Aspiny	0.00619757
Control	GC048	PWCNZ	PWCNZ D07	44	0	0	Aspiny	0.00686971
Control	GC048	PWCNZ	PWCNZ D07	45	0	0	Aspiny	0.00985684
Control	GC048	PWCNZ	PWCNZ D07	46	0	0	Aspiny	0.00643453
Control	GC048	PWCNZ	PWCNZ D07	47	0	0	Aspiny	0.0149734
Control	GC048	PWCNZ	PWCNZ D07	48	0	0	Aspiny	0.0156695
Control	GC048	PWCNZ	PWCNZ D07	49	0	0	Aspiny	0.017326
Control	GC048	PWCNZ	PWCNZ D07	50	0	0	Aspiny	0.0150444
Control	GC048	PWCNZ	PWCNZ D07	51	0	0	Aspiny	0.0216134
Control	GC048	PWCNZ	PWCNZ D07	52	0	0	Aspiny	0.0114865
Control	GC048	PWCNZ	PWCNZ D07	53	0	0	Aspiny	0.00950357
Control	GC048	PWCNZ	PWCNZ D07	54	0	0	Aspiny	0.00467645
Control	GC048	PWCNZ	PWCNZ D07	55	0	0	Aspiny	0.00873505
Control	GC048	PWCNZ	PWCNZ D07	56	0	0	Aspiny	0.00792605
Control	GC048	PWCNZ	PWCNZ D07	57	1	1	Spiny	0.00786603
Control	GC048	PWCNZ	PWCNZ D07	58	1	1	Spiny	0.00387026
Control	GC048	PWCNZ	PWCNZ D07	59	1	1	Spiny	0.00541724
Control	GC048	PWCNZ	PWCNZ D07	60	1	1	Spiny	0.00154367
Control	GC048	PWCNZ	PWCNZ D07	77	0	0	Aspiny	0.000819559
Control	GC048	PWCNZ	PWCNZ D07	78	0	0	Aspiny	0.00114063
Control	GC048	PWCNZ	PWCNZ D07	79	0	0	Aspiny	0.00131605
Control	GC048	PWCNZ	PWCNZ D07	80	0	0	Aspiny	0.00521541
Control	GC048	PWCNZ	PWCNZ D07	81	0	0	Aspiny	0.00368895
Control	GC048	PWCNZ	PWCNZ D07	82	1	1	Spiny	0.00551331
Control	GC048	PWCNZ	PWCNZ D07	83	1	1	Spiny	0.0114484
Control	GC048	PWCNZ	PWCNZ D07	84	1	1	Spiny	0.00310342
Control	GC048	PWCNZ	PWCNZ D07	85	1	1	Spiny	0.00172071
Control	GC048	PWCNZ	PWCNZ D07	86	1	1	Spiny	0.00436783
Control	GC048	PWCNZ	PWCNZ D07	87	1	1	Spiny	0.00755721
Control	GC048	PWCNZ	PWCNZ D07	88	1	1	Spiny	0.021239
Control	GC048	PWCNZ	PWCNZ D07	89	1	1	Spiny	0.0121674
Control	GC048	PWCNZ	PWCNZ D07	90	1	1	Spiny	0.0152435
Control	GC048	PWCNZ	PWCNZ D07	91	0	0	Aspiny	0.0129757
Control	GC048	PWCNZ	PWCNZ D07	92	0	0	Aspiny	0.00620523
Control	GC048	PWCNZ	PWCNZ D07	93	0	0	Aspiny	0.0060401
Control	GC048	PWCNZ	PWCNZ D07	94	0	0	Aspiny	0.00337601
Control	GC048	PWCNZ	PWCNZ D07	95	0	0	Aspiny	0.00523505
Control	GC048	PWCNZ	PWCNZ D07	96	0	0	Aspiny	0.00692482
Control	GC048	PWCNZ	PWCNZ D07	97	0	0	Aspiny	0.00570072
Control	GC048	PWCNZ	PWCNZ D07	98	0	0	Aspiny	0.0206999
Control	GC048	PWCNZ	PWCNZ D07	99	0	0	Aspiny	0.0190601
Control	GC048	PWCNZ	PWCNZ D07	100	0	0	Aspiny	0.0189785
Control	GC048	PWCNZ	PWCNZ D07	101	0	0	Aspiny	0.0347142
Control	GC048	PWCNZ	PWCNZ D07	102	0	0	Aspiny	0.0381364
Control	GC048	PWCNZ	PWCNZ D07	103	0	0	Aspiny	0.0220236
Control	GC048	PWCNZ	PWCNZ D07	104	0	0	Aspiny	0.0265371
Control	GC048	PWCNZ	PWCNZ D07	105	0	0	Aspiny	0.0372398
Control	GC048	PWCNZ	PWCNZ D07	106	0	0	Aspiny	0.0235049
Control	GC048	PWCNZ	PWCNZ D07	107	0	0	Aspiny	0.0177186
Control	GC048	PWCNZ	PWCNZ D07	108	0	0	Aspiny	0.0135325
Control	GC048	PWCNZ	PWCNZ D07	109	0	0	Aspiny	0.0108292
Control	GC048	PWCNZ	PWCNZ D07	110	0	0	Aspiny	0.0090301
Control	GC048	PWCNZ	PWCNZ D07	111	0	0	Aspiny	0.0208033
Control	GC048	PWCNZ	PWCNZ D07	112	0	0	Aspiny	0.0176497
Control	GC048	PWCNZ	PWCNZ D07	113	0	0	Aspiny	0.0112795
Control	GC048	PWCNZ	PWCNZ D07	114	0	0	Aspiny	0.00629942
Control	GC048	PWCNZ	PWCNZ D07	115	0	0	Aspiny	0.00179471
Control	GC048	PWCNZ	PWCNZ D07	116	0	0	Aspiny	0.00572281
Control	GC048	PWCNZ	PWCNZ D07	117	0	0	Aspiny	0.0107743
Control	GC048	PWCNZ	PWCNZ D07	118	0	0	Aspiny	0.0194996
Control	GC048	PWCNZ	PWCNZ D07	119	0	0	Aspiny	0.0328765
Control	GC048	PWCNZ	PWCNZ D07	120	0	0	Aspiny	0.03945
Control	GC048	PWCNZ	PWCNZ D07	121	0	0	Aspiny	0.0311927
Control	GC048	PWCNZ	PWCNZ D07	122	0	0	Aspiny	0.0503539
Control	GC048	PWCNZ	PWCNZ D07	123	0	0	Aspiny	0.0331607
Control	GC048	PWCNZ	PWCNZ D07	124	0	0	Aspiny	0.035472
Control	GC048	PWCNZ	PWCNZ D07	125	0	0	Aspiny	0.0246405
Control	GC048	PWCNZ	PWCNZ D07	126	0	0	Aspiny	0.0225723
Control	GC048	PWCNZ	PWCNZ D07	127	0	0	Aspiny	0.0340576
Control	GC048	PWCNZ	PWCNZ D07	128	0	0	Aspiny	0.0606424
Control	GC048	PWCNZ	PWCNZ D07	129	0	0	Aspiny	0.0319221
Control	GC048	PWCNZ	PWCNZ D07	130	0	0	Aspiny	0.0187426
Control	GC048	PWCNZ	PWCNZ D07	131	0	0	Aspiny	0.0250086
Control	GC048	PWCNZ	PWCNZ D07	132	0	0	Aspiny	0.034644
Control	GC048	PWCNZ	PWCNZ D07	133	0	0	Aspiny	0.0288171
Control	GC048	PWCNZ	PWCNZ D07	134	0	0	Aspiny	0.0370698
Control	GC048	PWCNZ	PWCNZ D07	135	3	3	Spiny	0.0395743
Control	GC048	PWCNZ	PWCNZ D07	136	3	3	Spiny	0.0706015
Control	GC048	PWCNZ	PWCNZ D07	137	3	3	Spiny	0.0572835
Control	GC048	PWCNZ	PWCNZ D07	138	3	3	Spiny	0.0325125
Control	GC048	PWCNZ	PWCNZ D07	139	3	3	Spiny	0.0648151
Control	GC048	PWCNZ	PWCNZ D07	140	3	3	Spiny	0.0894886
Control	GC048	PWCNZ	PWCNZ D07	141	3	3	Spiny	0.0396136
Control	GC048	PWCNZ	PWCNZ D07	142	3	3	Spiny	0.0522364
Control	GC048	PWCNZ	PWCNZ D07	143	3	3	Spiny	0.0396363
Control	GC048	PWCNZ	PWCNZ D07	144	3	3	Spiny	0.0652886
Control	GC048	PWCNZ	PWCNZ D07	145	3	3	Spiny	0.0618032
Control	GC048	PWCNZ	PWCNZ D07	146	3	3	Spiny	0.0447441
Control	GC048	PWCNZ	PWCNZ D07	147	3	3	Spiny	0.0431009
Control	GC048	PWCNZ	PWCNZ D07	148	3	3	Spiny	0.0169143
Control	GC048	PWCNZ	PWCNZ D07	149	3	3	Spiny	0.0165036
Control	GC048	PWCNZ	PWCNZ D07	150	3	3	Spiny	0.0211387
Control	GC048	PWCNZ	PWCNZ D07	151	3	3	Spiny	0.0143753
Control	GC048	PWCNZ	PWCNZ D07	152	3	3	Spiny	0.0052518
Control	GC048	PWCNZ	PWCNZ D07	153	0	0	Aspiny	0.00835168
Control	GC048	PWCNZ	PWCNZ D07	154	0	0	Aspiny	0.00971162
Control	GC048	PWCNZ	PWCNZ D07	155	0	0	Aspiny	0.0139022
Control	GC048	PWCNZ	PWCNZ D07	156	0	0	Aspiny	0.0081138
Control	GC048	PWCNZ	PWCNZ D07	157	0	0	Aspiny	0.00283201
Control	GC048	PWCNZ	PWCNZ D07	158	0	0	Aspiny	0.0105297
Control	GC048	PWCNZ	PWCNZ D07	159	0	0	Aspiny	0.0122601
Control	GC048	PWCNZ	PWCNZ D07	160	0	0	Aspiny	0.0069625
Control	GC048	PWCNZ	PWCNZ D07	161	0	0	Aspiny	0.0139868
Control	GC048	PWCNZ	PWCNZ D07	162	0	0	Aspiny	0.00779493
Control	GC048	PWCNZ	PWCNZ D07	163	0	0	Aspiny	0.0225453
Control	GC048	PWCNZ	PWCNZ D07	164	0	0	Aspiny	0.0254155
Control	GC048	PWCNZ	PWCNZ D07	165	0	0	Aspiny	0.0130012
Control	GC048	PWCNZ	PWCNZ D07	166	0	0	Aspiny	0.0141957
Control	GC048	PWCNZ	PWCNZ D07	167	0	0	Aspiny	0.00200937
Control	GC048	PWCNZ	PWCNZ D07	168	0	0	Aspiny	0.00170806
Control	GC048	PWCNZ	PWCNZ D07	169	0	0	Aspiny	0.00647022
Control	GC048	PWCNZ	PWCNZ D07	170	0	0	Aspiny	0.00291399
Control	GC048	PWCNZ	PWCNZ D07	171	0	0	Aspiny	0.00108036
Control	GC048	PWCNZ	PWCNZ D07	172	0	0	Aspiny	0.00123717
Control	GC048	PWCNZ	PWCNZ D07	173	0	0	Aspiny	0.00110794
Control	GC048	PWCNZ	PWCNZ D07	174	0	0	Aspiny	0.000950779
Control	GC048	PWCNZ	PWCNZ D07	175	0	0	Aspiny	0.000662469
Control	GC048	PWCNZ	PWCNZ D07	176	0	0	Aspiny	0.00148098
Control	GC048	PWCNZ	PWCNZ D07	177	0	0	Aspiny	0.00598174
Control	GC048	PWCNZ	PWCNZ D07	178	0	0	Aspiny	0.000594646
Control	GC048	PWCNZ	PWCNZ D07	179	0	0	Aspiny	0.000393667
Control	GC048	PWCNZ	PWCNZ D07	180	0	0	Aspiny	0.000572586
Control	GC048	PWCNZ	PWCNZ D07	181	0	0	Aspiny	0.00494362
Control	GC048	PWCNZ	PWCNZ D07	182	0	0	Aspiny	0.00968926
Control	GC048	PWCNZ	PWCNZ D07	183	0	0	Aspiny	0.0106761
Control	GC048	PWCNZ	PWCNZ D07	184	0	0	Aspiny	0.00964297
Control	GC048	PWCNZ	PWCNZ D07	185	0	0	Aspiny	0.00977902
Control	GC048	PWCNZ	PWCNZ D07	186	0	0	Aspiny	0.0115363
Control	GC048	PWCNZ	PWCNZ D07	187	0	0	Aspiny	0.0178539
Control	GC048	PWCNZ	PWCNZ D07	188	0	0	Aspiny	0.00704316
Control	GC048	PWCNZ	PWCNZ D07	189	0	0	Aspiny	0.00705428
Control	GC048	PWCNZ	PWCNZ D07	190	0	0	Aspiny	0.00793292
Control	GC048	PWCNZ	PWCNZ D07	191	0	0	Aspiny	0.0161593
Control	GC048	PWCNZ	PWCNZ D07	192	1	1	Spiny	0.0373318
Control	GC048	PWCNZ	PWCNZ D07	193	1	1	Spiny	0.0546139
Control	GC048	PWCNZ	PWCNZ D07	194	1	1	Spiny	0.0770897
Control	GC048	PWCNZ	PWCNZ D07	195	1	1	Spiny	0.0579589
Control	GC048	PWCNZ	PWCNZ D07	196	1	1	Spiny	0.0549652
Control	GC048	PWCNZ	PWCNZ D07	197	1	1	Spiny	0.0220521
Control	GC048	PWCNZ	PWCNZ D07	198	1	1	Spiny	0.0133728
Control	GC048	PWCNZ	PWCNZ D07	199	1	1	Spiny	0.00647071
Control	GC048	PWCNZ	PWCNZ D11	7	1	1	Spiny	0.00256807
Control	GC048	PWCNZ	PWCNZ D11	8	1	1	Spiny	0.00164577
Control	GC048	PWCNZ	PWCNZ D11	9	1	1	Spiny	0.0010724
Control	GC048	PWCNZ	PWCNZ D11	10	1	1	Spiny	0.00597504
Control	GC048	PWCNZ	PWCNZ D11	11	1	1	Spiny	0.00243714
Control	GC048	PWCNZ	PWCNZ D11	12	0	0	Aspiny	0.00857446
Control	GC048	PWCNZ	PWCNZ D11	13	0	0	Aspiny	0.0103437
Control	GC048	PWCNZ	PWCNZ D11	14	0	0	Aspiny	0.0172696
Control	GC048	PWCNZ	PWCNZ D11	15	1	1	Spiny	0.0191908
Control	GC048	PWCNZ	PWCNZ D11	16	1	1	Spiny	0.0130112
Control	GC048	PWCNZ	PWCNZ D11	17	1	1	Spiny	0.00719573
Control	GC048	PWCNZ	PWCNZ D11	18	1	1	Spiny	0.00674751
Control	GC048	PWCNZ	PWCNZ D11	19	1	1	Spiny	0.0103148
Control	GC048	PWCNZ	PWCNZ D11	20	0	0	Aspiny	0.00724407
Control	GC048	PWCNZ	PWCNZ D11	21	0	0	Aspiny	0.00155125
Control	GC048	PWCNZ	PWCNZ D11	22	0	0	Aspiny	0.00289251
Control	GC048	PWCNZ	PWCNZ D11	23	0	0	Aspiny	0.0052415
Control	GC048	PWCNZ	PWCNZ D11	24	0	0	Aspiny	0.0122359
Control	GC048	PWCNZ	PWCNZ D11	36	3	3	Spiny	0.00335361
Control	GC048	PWCNZ	PWCNZ D11	37	3	3	Spiny	0.00899296
Control	GC048	PWCNZ	PWCNZ D11	38	3	3	Spiny	0.00735581
Control	GC048	PWCNZ	PWCNZ D11	39	3	3	Spiny	0.00569236
Control	GC048	PWCNZ	PWCNZ D11	40	3	3	Spiny	0.00472512
Control	GC048	PWCNZ	PWCNZ D11	41	3	3	Spiny	0.0070412
Control	GC048	PWCNZ	PWCNZ D11	42	3	3	Spiny	0.00631738
Control	GC048	PWCNZ	PWCNZ D11	43	3	3	Spiny	0.0124045
Control	GC048	PWCNZ	PWCNZ D11	44	3	3	Spiny	0.00923104
Control	GC048	PWCNZ	PWCNZ D11	45	3	3	Spiny	0.00581698
Control	GC048	PWCNZ	PWCNZ D11	46	3	3	Spiny	0.00153252
Control	GC048	PWCNZ	PWCNZ D11	47	0	0	Aspiny	0.00816822
Control	GC048	PWCNZ	PWCNZ D11	48	0	0	Aspiny	0.00887627
Control	GC048	PWCNZ	PWCNZ D11	49	0	0	Aspiny	0.0163916
Control	GC048	PWCNZ	PWCNZ D11	50	0	0	Aspiny	0.0123034
Control	GC048	PWCNZ	PWCNZ D11	51	0	0	Aspiny	0.0145928
Control	GC048	PWCNZ	PWCNZ D11	52	0	0	Aspiny	0.0154189
Control	GC048	PWCNZ	PWCNZ D11	53	0	0	Aspiny	0.013299
Control	GC048	PWCNZ	PWCNZ D11	54	0	0	Aspiny	0.00883481
Control	GC048	PWCNZ	PWCNZ D11	55	0	0	Aspiny	0.00647456
Control	GC048	PWCNZ	PWCNZ D11	56	1	1	Spiny	0.00609777
Control	GC048	PWCNZ	PWCNZ D11	57	1	1	Spiny	0.00696095
Control	GC048	PWCNZ	PWCNZ D11	58	0	0	Aspiny	0.00318258
Control	GC048	PWCNZ	PWCNZ D11	59	0	0	Aspiny	0.00395195
Control	GC048	PWCNZ	PWCNZ D11	60	0	0	Aspiny	0.00551376
Control	GC048	PWCNZ	PWCNZ D11	61	0	0	Aspiny	0.0094722
Control	GC048	PWCNZ	PWCNZ D11	62	0	0	Aspiny	0.0101007
Control	GC048	PWCNZ	PWCNZ D11	63	0	0	Aspiny	0.0107722
Control	GC048	PWCNZ	PWCNZ D11	64	1	1	Spiny	0.0115936
Control	GC048	PWCNZ	PWCNZ D11	65	1	1	Spiny	0.00848513
Control	GC048	PWCNZ	PWCNZ D11	66	1	1	Spiny	0.0259989
Control	GC048	PWCNZ	PWCNZ D11	67	1	1	Spiny	0.0197744
Control	GC048	PWCNZ	PWCNZ D11	68	1	1	Spiny	0.0204823
Control	GC048	PWCNZ	PWCNZ D11	69	0	0	Aspiny	0.0166537
Control	GC048	PWCNZ	PWCNZ D11	70	0	0	Aspiny	0.0139049
Control	GC048	PWCNZ	PWCNZ D11	71	0	0	Aspiny	0.0119782
Control	GC048	PWCNZ	PWCNZ D11	72	0	0	Aspiny	0.0139453
Control	GC048	PWCNZ	PWCNZ D11	73	0	0	Aspiny	0.0031636
Control	GC048	PWCNZ	PWCNZ D11	74	0	0	Aspiny	0.000648418
Control	GC048	PWCNZ	PWCNZ D11	75	0	0	Aspiny	0.00041657
Control	GC048	PWCNZ	PWCNZ D11	76	0	0	Aspiny	0.000701252
Control	GC048	PWCNZ	PWCNZ D11	77	0	0	Aspiny	0.00994192
Control	GC048	PWCNZ	PWCNZ D11	78	1	1	Spiny	0.00479143
Control	GC048	PWCNZ	PWCNZ D11	79	1	1	Spiny	0.00603911
Control	GC048	PWCNZ	PWCNZ D11	80	1	1	Spiny	0.00477722
Control	GC048	PWCNZ	PWCNZ D11	81	1	1	Spiny	0.00463161
Control	GC048	PWCNZ	PWCNZ D11	82	1	1	Spiny	0.000376512
Control	GC048	PWCNZ	PWCNZ D11	83	0	0	Aspiny	0.00106908
Control	GC048	PWCNZ	PWCNZ D11	84	0	0	Aspiny	0.00179429
Control	GC048	PWCNZ	PWCNZ D11	85	0	0	Aspiny	0.00167344
Control	GC048	PWCNZ	PWCNZ D11	86	0	0	Aspiny	0.00299252
Control	GC048	PWCNZ	PWCNZ D11	87	0	0	Aspiny	0.00229339
Control	GC048	PWCNZ	PWCNZ D11	88	0	0	Aspiny	0.00682625
Control	GC048	PWCNZ	PWCNZ D11	89	0	0	Aspiny	0.00517149
Control	GC048	PWCNZ	PWCNZ D11	90	0	0	Aspiny	0.00511866
Control	GC048	PWCNZ	PWCNZ D11	91	0	0	Aspiny	0.00994413
Control	GC048	PWCNZ	PWCNZ D11	92	0	0	Aspiny	0.00498803
Control	GC048	PWCNZ	PWCNZ D11	93	0	0	Aspiny	0.00749149
Control	GC048	PWCNZ	PWCNZ D11	94	0	0	Aspiny	0.00644081
Control	GC048	PWCNZ	PWCNZ D11	95	0	0	Aspiny	0.0029184
Control	GC048	PWCNZ	PWCNZ D11	96	0	0	Aspiny	0.00187604
Control	GC048	PWCNZ	PWCNZ D11	97	0	0	Aspiny	0.00206221
Control	GC048	PWCNZ	PWCNZ D11	98	0	0	Aspiny	0.0329286
Control	GC048	PWCNZ	PWCNZ D11	99	0	0	Aspiny	0.0379643
Control	GC048	PWCNZ	PWCNZ D11	100	0	0	Aspiny	0.0265866
Control	GC048	PWCNZ	PWCNZ D11	101	0	0	Aspiny	0.00547339
Control	GC048	PWCNZ	PWCNZ D11	102	0	0	Aspiny	0.00622906
Control	GC048	PWCNZ	PWCNZ D11	103	0	0	Aspiny	0.00493207
Control	GC048	PWCNZ	PWCNZ D11	104	0	0	Aspiny	0.00832965
Control	GC048	PWCNZ	PWCNZ D11	105	0	0	Aspiny	0.0091673
Control	GC048	PWCNZ	PWCNZ D11	106	0	0	Aspiny	0.0157824
Control	GC048	PWCNZ	PWCNZ D11	107	0	0	Aspiny	0.00569325
Control	GC048	PWCNZ	PWCNZ D11	108	0	0	Aspiny	0.00510972
Control	GC048	PWCNZ	PWCNZ D11	109	0	0	Aspiny	0.00470221
Control	GC048	PWCNZ	PWCNZ D11	110	0	0	Aspiny	0.00982318
Control	GC048	PWCNZ	PWCNZ D11	111	0	0	Aspiny	0.0130227
Control	GC048	PWCNZ	PWCNZ D11	112	0	0	Aspiny	0.0111747
Control	GC048	PWCNZ	PWCNZ D11	113	0	0	Aspiny	0.00866498
Control	GC048	PWCNZ	PWCNZ D11	114	0	0	Aspiny	0.00837157
Control	GC048	PWCNZ	PWCNZ D11	115	0	0	Aspiny	0.00683791
Control	GC048	PWCNZ	PWCNZ D11	116	0	0	Aspiny	0.00193333
Control	GC048	PWCNZ	PWCNZ D11	117	0	0	Aspiny	0.00245672
Control	GC048	PWCNZ	PWCNZ D11	118	0	0	Aspiny	0.00114193
Control	GC048	PWCNZ	PWCNZ D11	119	0	0	Aspiny	0.00303858
Control	GC048	PWCNZ	PWCNZ D11	120	0	0	Aspiny	0.00419317
Control	GC048	PWCNZ	PWCNZ D11	121	0	0	Aspiny	0.00366346
Control	GC048	PWCNZ	PWCNZ D11	122	0	0	Aspiny	0.00431782
Control	GC048	PWCNZ	PWCNZ D11	123	0	0	Aspiny	0.00119078
Control	GC048	PWCNZ	PWCNZ D11	124	0	0	Aspiny	0.00803417
Control	GC048	PWCNZ	PWCNZ D11	125	0	0	Aspiny	0.00345297
Control	GC048	PWCNZ	PWCNZ D11	126	0	0	Aspiny	0.00334892
Control	GC048	PWCNZ	PWCNZ D11	127	0	0	Aspiny	0.00432533
Control	GC048	PWCNZ	PWCNZ D11	128	0	0	Aspiny	0.0159511
Control	GC048	PWCNZ	PWCNZ D11	129	0	0	Aspiny	0.0135286
Control	GC048	PWCNZ	PWCNZ D11	130	0	0	Aspiny	0.00168384
Control	GC048	PWCNZ	PWCNZ D11	131	0	0	Aspiny	0.00333041
Control	GC048	PWCNZ	PWCNZ D11	132	0	0	Aspiny	0.0064656
Control	GC048	PWCNZ	PWCNZ D11	133	2	2	Spiny	0.00532163
Control	GC048	PWCNZ	PWCNZ D11	134	2	2	Spiny	0.0320033
Control	GC048	PWCNZ	PWCNZ D11	135	2	2	Spiny	0.0382266
Control	GC048	PWCNZ	PWCNZ D11	136	2	2	Spiny	0.0231149
Control	GC048	PWCNZ	PWCNZ D11	137	2	2	Spiny	0.00840452
Control	GC048	PWCNZ	PWCNZ D11	138	2	2	Spiny	0.0042154
Control	GC048	PWCNZ	PWCNZ D11	139	2	2	Spiny	0.00341752
Control	GC048	PWCNZ	PWCNZ D11	140	2	2	Spiny	0.00437259
Control	GC048	PWCNZ	PWCNZ D11	141	2	2	Spiny	0.0133429
Control	GC048	PWCNZ	PWCNZ D11	142	2	2	Spiny	0.00369853
Control	GC048	PWCNZ	PWCNZ D11	143	0	0	Aspiny	0.00930841
Control	GC048	PWCNZ	PWCNZ D11	144	0	0	Aspiny	0.0288844
Control	GC048	PWCNZ	PWCNZ D11	145	1	1	Spiny	0.00884885
Control	GC048	PWCNZ	PWCNZ D11	146	1	1	Spiny	0.00301799
Control	GC048	PWCNZ	PWCNZ D11	147	1	1	Spiny	0.00199084
Control	GC048	PWCNZ	PWCNZ D11	148	1	1	Spiny	0.00223514
Control	GC048	PWCNZ	PWCNZ D11	149	1	1	Spiny	0.00101263
Control	GC048	PWCNZ	PWCNZ D11	150	0	0	Aspiny	0.0102299
Control	GC048	PWCNZ	PWCNZ D11	151	0	0	Aspiny	0.0227737
Control	GC048	PWCNZ	PWCNZ D11	152	0	0	Aspiny	0.0186361
Control	GC048	PWCNZ	PWCNZ D11	153	0	0	Aspiny	0.0161298
Control	GC048	PWCNZ	PWCNZ D11	154	0	0	Aspiny	0.0111887
Control	GC048	PWCNZ	PWCNZ D11	155	0	0	Aspiny	0.018299
Control	GC048	PWCNZ	PWCNZ D11	156	0	0	Aspiny	0.00562048
Control	GC048	PWCNZ	PWCNZ D11	157	0	0	Aspiny	0.0102431
Control	GC048	PWCNZ	PWCNZ D11	158	0	0	Aspiny	0.00731124
Control	GC048	PWCNZ	PWCNZ D11	159	0	0	Aspiny	0.00475335
Control	GC048	PWCNZ	PWCNZ D11	160	0	0	Aspiny	0.0127414
Control	GC048	PWCNZ	PWCNZ D11	161	0	0	Aspiny	0.0242056
Control	GC048	PWCNZ	PWCNZ D11	162	0	0	Aspiny	0.0263746
Control	GC048	PWCNZ	PWCNZ D11	163	0	0	Aspiny	0.0344754
Control	GC048	PWCNZ	PWCNZ D11	164	0	0	Aspiny	0.0223448
Control	GC048	PWCNZ	PWCNZ D11	165	0	0	Aspiny	0.0193082
Control	GC048	PWCNZ	PWCNZ D11	166	0	0	Aspiny	0.017276
Control	GC048	PWCNZ	PWCNZ D11	167	0	0	Aspiny	0.0177401
Control	GC048	PWCNZ	PWCNZ D11	168	0	0	Aspiny	0.0159121
Control	GC048	PWCNZ	PWCNZ D11	169	0	0	Aspiny	0.0191941
Control	GC048	PWCNZ	PWCNZ D11	170	0	0	Aspiny	0.0104165
Control	GC048	PWCNZ	PWCNZ D11	171	0	0	Aspiny	0.0084695
Control	GC048	PWCNZ	PWCNZ D11	172	0	0	Aspiny	0.00668141
Control	GC048	PWCNZ	PWCNZ D11	173	0	0	Aspiny	0.00805844
Control	GC048	PWCNZ	PWCNZ D11	174	0	0	Aspiny	0.0125996
Control	GC048	PWCNZ	PWCNZ D11	175	0	0	Aspiny	0.0144712
Control	GC048	PWCNZ	PWCNZ D11	176	0	0	Aspiny	0.0175297
Control	GC048	PWCNZ	PWCNZ D11	177	0	0	Aspiny	0.019073
Control	GC048	PWCNZ	PWCNZ D11	178	1	1	Spiny	0.0143889
Control	GC048	PWCNZ	PWCNZ D11	179	1	1	Spiny	0.00471564
Control	GC048	PWCNZ	PWCNZ D11	180	1	1	Spiny	0.0139736
Control	GC048	PWCNZ	PWCNZ D11	181	1	1	Spiny	0.0129153
Control	GC048	PWCNZ	PWCNZ D11	182	1	1	Spiny	0.00670435
Control	GC048	PWCNZ	PWCNZ D11	183	1	1	Spiny	0.0185632
Control	GC048	PWCNZ	PWCNZ D11	184	0	0	Aspiny	0.0123443
Control	GC048	PWCNZ	PWCNZ D11	185	0	0	Aspiny	0.00594315
Control	GC048	PWCNZ	PWCNZ D11	186	0	0	Aspiny	0.00630301
Control	GC048	PWCNZ	PWCNZ D11	187	0	0	Aspiny	0.00502562
Control	GC048	PWCNZ	PWCNZ D11	188	0	0	Aspiny	0.00233902
Control	GC048	PWCNZ	PWCNZ D11	189	0	0	Aspiny	0.00406969
Control	GC048	PWCNZ	PWCNZ D11	190	0	0	Aspiny	0.00532374
Control	GC048	PWCNZ	PWCNZ D11	191	0	0	Aspiny	0.00387067
Control	GC048	PWCNZ	PWCNZ D11	192	0	0	Aspiny	0.0025049
Control	GC048	PWCNZ	PWCNZ D11	193	0	0	Aspiny	0.00330093
Control	GC048	PWCNZ	PWCNZ D11	194	0	0	Aspiny	0.00166324
Control	GC048	PWCNZ	PWCNZ D11	195	0	0	Aspiny	0.000725186
Control	GC048	PWCNZ	PWCNZ D11	196	0	0	Aspiny	0.000922596
Control	GC048	PWCNZ	PWCNZ D11	197	0	0	Aspiny	0.00555636
Control	GC048	PWCNZ	PWCNZ D11	198	0	0	Aspiny	0.0145696
Control	GC048	PWCNZ	PWCNZ D11	199	0	0	Aspiny	0.022812
Control	GC048	PWCNZ	PWCNZ D11	200	0	0	Aspiny	0.026507
Control	GC048	PWCNZ	PWCNZ D11	201	0	0	Aspiny	0.014693
Control	GC048	PWCNZ	PWCNZ D11	202	0	0	Aspiny	0.0100452
Control	GC048	PWCNZ	PWCNZ D11	203	0	0	Aspiny	0.00674139
Control	GC048	PWCNZ	PWCNZ D11	204	0	0	Aspiny	0.0111547
Control	GC048	PWCNZ	PWCNZ D11	205	0	0	Aspiny	0.0140075
Control	GC048	PWCNZ	PWCNZ D11	206	0	0	Aspiny	0.00715878
Control	GC048	PWCNZ	PWCNZ D11	207	0	0	Aspiny	0.00611601
Control	GC048	PWCNZ	PWCNZ D11	208	0	0	Aspiny	0.0149749
Control	GC048	PWCNZ	PWCNZ D11	209	0	0	Aspiny	0.0179894
Control	GC048	PWCNZ	PWCNZ D25	7	0	0	Aspiny	0.0141169
Control	GC048	PWCNZ	PWCNZ D25	8	0	0	Aspiny	0.0139974
Control	GC048	PWCNZ	PWCNZ D25	9	0	0	Aspiny	0.00809454
Control	GC048	PWCNZ	PWCNZ D25	10	0	0	Aspiny	0.0154162
Control	GC048	PWCNZ	PWCNZ D25	11	0	0	Aspiny	0.00541327
Control	GC048	PWCNZ	PWCNZ D25	12	0	0	Aspiny	0.0163347
Control	GC048	PWCNZ	PWCNZ D25	13	0	0	Aspiny	0.0267594
Control	GC048	PWCNZ	PWCNZ D25	14	0	0	Aspiny	0.0267511
Control	GC048	PWCNZ	PWCNZ D25	15	0	0	Aspiny	0.0210791
Control	GC048	PWCNZ	PWCNZ D25	16	0	0	Aspiny	0.0190347
Control	GC048	PWCNZ	PWCNZ D25	17	1	1	Spiny	0.0110775
Control	GC048	PWCNZ	PWCNZ D25	18	1	1	Spiny	0.0146131
Control	GC048	PWCNZ	PWCNZ D25	19	1	1	Spiny	0.0187922
Control	GC048	PWCNZ	PWCNZ D25	20	1	1	Spiny	0.0126041
Control	GC048	PWCNZ	PWCNZ D25	21	1	1	Spiny	0.00227137
Control	GC048	PWCNZ	PWCNZ D25	22	1	1	Spiny	0.00277877
Control	GC048	PWCNZ	PWCNZ D25	23	1	1	Spiny	0.00656562
Control	GC048	PWCNZ	PWCNZ D25	24	1	1	Spiny	0.0059686
Control	GC048	PWCNZ	PWCNZ D25	25	1	1	Spiny	0.0028329
Control	GC048	PWCNZ	PWCNZ D25	26	1	1	Spiny	0.00478226
Control	GC048	PWCNZ	PWCNZ D25	27	1	1	Spiny	0.0151338
Control	GC048	PWCNZ	PWCNZ D25	28	1	1	Spiny	0.0054967
Control	GC048	PWCNZ	PWCNZ D25	29	1	1	Spiny	0.0054967
Control	GC048	PWCNZ	PWCNZ D25	30	1	1	Spiny	0.0062076
Control	GC048	PWCNZ	PWCNZ D25	31	1	1	Spiny	0.00700728
Control	GC048	PWCNZ	PWCNZ D25	32	0	0	Aspiny	0.00458372
Control	GC048	PWCNZ	PWCNZ D25	33	0	0	Aspiny	0.0281718
Control	GC048	PWCNZ	PWCNZ D25	34	0	0	Aspiny	0.0281397
Control	GC048	PWCNZ	PWCNZ D25	35	1	1	Spiny	0.00995255
Control	GC048	PWCNZ	PWCNZ D25	36	1	1	Spiny	0.00851543
Control	GC048	PWCNZ	PWCNZ D25	37	1	1	Spiny	0.0155536
Control	GC048	PWCNZ	PWCNZ D25	38	1	1	Spiny	0.00914089
Control	GC048	PWCNZ	PWCNZ D25	39	1	1	Spiny	0.00980831
Control	GC048	PWCNZ	PWCNZ D25	40	1	1	Spiny	0.0053212
Control	GC048	PWCNZ	PWCNZ D25	41	1	1	Spiny	0.0118524
Control	GC048	PWCNZ	PWCNZ D25	42	1	1	Spiny	0.015011
Control	GC048	PWCNZ	PWCNZ D25	43	1	1	Spiny	0.0170989
Control	GC048	PWCNZ	PWCNZ D25	44	1	1	Spiny	0.00639712
Control	GC048	PWCNZ	PWCNZ D25	45	1	1	Spiny	0.0066653
Control	GC048	PWCNZ	PWCNZ D25	46	1	1	Spiny	0.0135847
Control	GC048	PWCNZ	PWCNZ D25	47	0	0	Aspiny	0.0253704
Control	GC048	PWCNZ	PWCNZ D25	48	0	0	Aspiny	0.0266571
Control	GC048	PWCNZ	PWCNZ D25	49	0	0	Aspiny	0.0310794
Control	GC048	PWCNZ	PWCNZ D25	50	0	0	Aspiny	0.026748
Control	GC048	PWCNZ	PWCNZ D25	51	0	0	Aspiny	0.0167483
Control	GC048	PWCNZ	PWCNZ D25	52	0	0	Aspiny	0.0172307
Control	GC048	PWCNZ	PWCNZ D25	53	0	0	Aspiny	0.0180308
Control	GC048	PWCNZ	PWCNZ D25	54	0	0	Aspiny	0.0261204
Control	GC048	PWCNZ	PWCNZ D25	55	0	0	Aspiny	0.0178353
Control	GC048	PWCNZ	PWCNZ D25	56	0	0	Aspiny	0.0232454
Control	GC048	PWCNZ	PWCNZ D25	57	0	0	Aspiny	0.0324079
Control	GC048	PWCNZ	PWCNZ D25	67	0	0	Aspiny	0.0164309
Control	GC048	PWCNZ	PWCNZ D25	68	0	0	Aspiny	0.0159944
Control	GC048	PWCNZ	PWCNZ D25	69	0	0	Aspiny	0.0114441
Control	GC048	PWCNZ	PWCNZ D25	70	0	0	Aspiny	0.00916226
Control	GC048	PWCNZ	PWCNZ D25	71	0	0	Aspiny	0.00911251
Control	GC048	PWCNZ	PWCNZ D25	72	0	0	Aspiny	0.00915826
Control	GC048	PWCNZ	PWCNZ D25	73	0	0	Aspiny	0.00539453
Control	GC048	PWCNZ	PWCNZ D25	74	0	0	Aspiny	0.00831114
Control	GC048	PWCNZ	PWCNZ D25	75	0	0	Aspiny	0.0129547
Control	GC048	PWCNZ	PWCNZ D25	76	0	0	Aspiny	0.0298727
Control	GC048	PWCNZ	PWCNZ D25	86	2	2	Spiny	0.0117506
Control	GC048	PWCNZ	PWCNZ D25	87	2	2	Spiny	0.0229562
Control	GC048	PWCNZ	PWCNZ D25	88	2	2	Spiny	0.00983924
Control	GC048	PWCNZ	PWCNZ D25	89	2	2	Spiny	0.0177729
Control	GC048	PWCNZ	PWCNZ D25	90	2	2	Spiny	0.0274217
Control	GC048	PWCNZ	PWCNZ D25	91	2	2	Spiny	0.0297714
Control	GC048	PWCNZ	PWCNZ D25	92	2	2	Spiny	0.0135606
Control	GC048	PWCNZ	PWCNZ D25	93	2	2	Spiny	0.00147776
Control	GC048	PWCNZ	PWCNZ D25	94	2	2	Spiny	0.00176868
Control	GC048	PWCNZ	PWCNZ D25	95	2	2	Spiny	0.000510611
Control	GC048	PWCNZ	PWCNZ D25	96	2	2	Spiny	0.0162713
Control	GC048	PWCNZ	PWCNZ D25	97	2	2	Spiny	0.0183063
Control	GC048	PWCNZ	PWCNZ D25	98	0	0	Aspiny	0.00420634
Control	GC048	PWCNZ	PWCNZ D25	99	0	0	Aspiny	0.00476969
Control	GC048	PWCNZ	PWCNZ D25	100	0	0	Aspiny	0.00381017
Control	GC048	PWCNZ	PWCNZ D25	101	0	0	Aspiny	0.00490099
Control	GC048	PWCNZ	PWCNZ D25	102	0	0	Aspiny	0.00686119
Control	GC048	PWCNZ	PWCNZ D25	103	0	0	Aspiny	0.00190504
Control	GC048	PWCNZ	PWCNZ D25	104	0	0	Aspiny	0.0153357
Control	GC048	PWCNZ	PWCNZ D25	105	0	0	Aspiny	0.0204169
Control	GC048	PWCNZ	PWCNZ D25	106	0	0	Aspiny	0.0191135
Control	GC048	PWCNZ	PWCNZ D25	107	0	0	Aspiny	0.0148672
Control	GC048	PWCNZ	PWCNZ D25	108	0	0	Aspiny	0.0152247
Control	GC048	PWCNZ	PWCNZ D25	109	0	0	Aspiny	0.0122888
Control	GC048	PWCNZ	PWCNZ D25	110	0	0	Aspiny	0.0071417
Control	GC048	PWCNZ	PWCNZ D25	111	0	0	Aspiny	0.0124093
Control	GC048	PWCNZ	PWCNZ D25	112	0	0	Aspiny	0.0192256
Control	GC048	PWCNZ	PWCNZ D25	113	0	0	Aspiny	0.0126296
Control	GC048	PWCNZ	PWCNZ D25	114	0	0	Aspiny	0.0261369
Control	GC048	PWCNZ	PWCNZ D25	115	0	0	Aspiny	0.00991975
Control	GC048	PWCNZ	PWCNZ D25	116	0	0	Aspiny	0.0178393
Control	GC048	PWCNZ	PWCNZ D25	117	0	0	Aspiny	0.029831
Control	GC048	PWCNZ	PWCNZ D25	118	0	0	Aspiny	0.027588
Control	GC048	PWCNZ	PWCNZ D25	119	0	0	Aspiny	0.00782199
Control	GC048	PWCNZ	PWCNZ D25	120	0	0	Aspiny	0.00392652
Control	GC048	PWCNZ	PWCNZ D25	121	0	0	Aspiny	0.00359098
Control	GC048	PWCNZ	PWCNZ D25	122	0	0	Aspiny	0.0034092
Control	GC048	PWCNZ	PWCNZ D25	123	0	0	Aspiny	0.00934952
Control	GC048	PWCNZ	PWCNZ D25	124	0	0	Aspiny	0.00686299
Control	GC048	PWCNZ	PWCNZ D25	125	0	0	Aspiny	0.0118593
Control	GC048	PWCNZ	PWCNZ D25	126	0	0	Aspiny	0.0103825
Control	GC048	PWCNZ	PWCNZ D25	127	0	0	Aspiny	0.00943607
Control	GC048	PWCNZ	PWCNZ D25	128	0	0	Aspiny	0.00244265
Control	GC048	PWCNZ	PWCNZ D25	129	0	0	Aspiny	0.00476546
Control	GC048	PWCNZ	PWCNZ D25	130	0	0	Aspiny	0.00497779
Control	GC048	PWCNZ	PWCNZ D25	131	0	0	Aspiny	0.0040404
Control	GC048	PWCNZ	PWCNZ D25	132	0	0	Aspiny	0.00196637
Control	GC048	PWCNZ	PWCNZ D25	133	0	0	Aspiny	0.0046505
Control	GC048	PWCNZ	PWCNZ D25	134	0	0	Aspiny	0.00231176
Control	GC048	PWCNZ	PWCNZ D25	135	0	0	Aspiny	0.00135169
Control	GC048	PWCNZ	PWCNZ D25	136	0	0	Aspiny	0.00165159
Control	GC048	PWCNZ	PWCNZ D25	137	0	0	Aspiny	0.000840864
Control	GC048	PWCNZ	PWCNZ D25	138	0	0	Aspiny	0.0128635
Control	GC048	PWCNZ	PWCNZ D25	139	1	1	Spiny	0.0185049
Control	GC048	PWCNZ	PWCNZ D25	140	1	1	Spiny	0.013638
Control	GC048	PWCNZ	PWCNZ D25	141	1	1	Spiny	0.0155522
Control	GC048	PWCNZ	PWCNZ D25	142	1	1	Spiny	0.00886165
Control	GC048	PWCNZ	PWCNZ D25	143	1	1	Spiny	0.010337
Control	GC048	PWCNZ	PWCNZ D25	144	1	1	Spiny	0.0140646
Control	GC048	PWCNZ	PWCNZ D25	145	1	1	Spiny	0.0115889
Control	GC048	PWCNZ	PWCNZ D25	146	1	1	Spiny	0.0183624
Control	GC048	PWCNZ	PWCNZ D25	147	0	0	Aspiny	0.0181175
Control	GC048	PWCNZ	PWCNZ D25	148	0	0	Aspiny	0.0150351
Control	GC048	PWCNZ	PWCNZ D25	149	3	4	Spiny	0.0148953
Control	GC048	PWCNZ	PWCNZ D25	150	3	4	Spiny	0.0155414
Control	GC048	PWCNZ	PWCNZ D25	151	3	4	Spiny	0.00555744
Control	GC048	PWCNZ	PWCNZ D25	152	3	4	Spiny	0.00595817
Control	GC048	PWCNZ	PWCNZ D25	153	3	4	Spiny	0.00323635
Control	GC048	PWCNZ	PWCNZ D25	154	3	4	Spiny	0.00575965
Control	GC048	PWCNZ	PWCNZ D25	155	3	4	Spiny	0.013337
Control	GC048	PWCNZ	PWCNZ D25	156	3	4	Spiny	0.019596
Control	GC048	PWCNZ	PWCNZ D25	157	3	4	Spiny	0.0160625
Control	GC048	PWCNZ	PWCNZ D25	158	3	4	Spiny	0.0226299
Control	GC048	PWCNZ	PWCNZ D25	159	3	4	Spiny	0.0329927
Control	GC048	PWCNZ	PWCNZ D25	160	3	4	Spiny	0.0182946
Control	GC048	PWCNZ	PWCNZ D25	161	3	4	Spiny	0.0247412
Control	GC048	PWCNZ	PWCNZ D25	162	3	4	Spiny	0.0218516
Control	GC048	PWCNZ	PWCNZ D25	163	3	4	Spiny	0.037889
Control	GC048	PWCNZ	PWCNZ D25	164	3	4	Spiny	0.0319094
Control	GC048	PWCNZ	PWCNZ D25	165	3	4	Spiny	0.0153728
Control	GC048	PWCNZ	PWCNZ D25	166	3	4	Spiny	0.00134193
Control	GC048	PWCNZ	PWCNZ D25	167	3	4	Spiny	0.00526577
Control	GC048	PWCNZ	PWCNZ D25	168	0	0	Aspiny	0.0103192
Control	GC048	PWCNZ	PWCNZ D25	169	0	0	Aspiny	0.0117203
Control	GC048	PWCNZ	PWCNZ D25	170	0	0	Aspiny	0.00638118
Control	GC048	PWCNZ	PWCNZ D25	171	0	0	Aspiny	0.00800409
Control	GC048	PWCNZ	PWCNZ D25	172	0	0	Aspiny	0.0128306
Control	GC048	PWCNZ	PWCNZ D25	173	0	0	Aspiny	0.00952822
Control	GC048	PWCNZ	PWCNZ D25	174	0	0	Aspiny	0.00772742
Control	GC048	PWCNZ	PWCNZ D25	175	0	0	Aspiny	0.0020783
Control	GC048	PWCNZ	PWCNZ D25	176	0	0	Aspiny	0.000986854
Control	GC048	PWCNZ	PWCNZ D25	177	0	0	Aspiny	0.00278807
Control	GC048	PWCNZ	PWCNZ D25	178	0	0	Aspiny	0.00141222
Control	GC048	PWCNZ	PWCNZ D25	179	0	0	Aspiny	0.00128839
Control	GC048	PWCNZ	PWCNZ D25	180	0	0	Aspiny	0.00215743
Control	GC048	PWCNZ	PWCNZ D25	181	0	0	Aspiny	0.00295628
Control	GC048	PWCNZ	PWCNZ D25	182	0	0	Aspiny	0.0133206
Control	GC048	PWCNZ	PWCNZ D25	183	0	0	Aspiny	0.0251767
Control	GC048	PWCNZ	PWCNZ D25	184	0	0	Aspiny	0.0207054
Control	GC048	PWCNZ	PWCNZ D25	185	1	1	Spiny	0.0161792
Control	GC048	PWCNZ	PWCNZ D25	186	1	1	Spiny	0.0122585
Control	GC048	PWCNZ	PWCNZ D25	187	1	1	Spiny	0.00699368
Control	GC048	PWCNZ	PWCNZ D25	188	1	1	Spiny	0.0143963
Control	GC048	PWCNZ	PWCNZ D25	189	0	0	Aspiny	0.033085
Control	GC048	PWCNZ	PWCNZ D25	190	0	0	Aspiny	0.0180922
Control	GC048	PWCNZ	PWCNZ D25	191	0	0	Aspiny	0.0100653
Control	GC048	PWCNZ	PWCNZ D25	192	0	0	Aspiny	0.0118424
Control	GC048	PWCNZ	PWCNZ D25	193	0	0	Aspiny	0.0134732
Control	GC048	PWCNZ	PWCNZ D25	194	0	0	Aspiny	0.00519976
Control	GC048	PWCNZ	PWCNZ D25	195	0	0	Aspiny	0.0122635
Control	GC048	PWCNZ	PWCNZ D25	196	0	0	Aspiny	0.0132624
Control	GC048	PWCNZ	PWCNZ D25	197	0	0	Aspiny	0.00535044
Control	GC048	PWCNZ	PWCNZ D25	198	0	0	Aspiny	0.00599678
Control	GC048	PWCNZ	PWCNZ D25	199	0	0	Aspiny	0.00752169
Control	GC048	PWCNZ	PWCNZ D25	200	0	0	Aspiny	0.015586
Control	GC048	PWCNZ	PWCNZ D25	201	0	0	Aspiny	0.00996603
Control	GC048	PWCNZ	PWCNZ D25	202	0	0	Aspiny	0.0147841
Control	GC048	PWCNZ	PWCNZ D25	203	0	0	Aspiny	0.0374825
Control	GC048	PWCNZ	PWCNZ D25	204	0	0	Aspiny	0.0316217
Control	GC048	PWCNZ	PWCNZ D25	205	0	0	Aspiny	0.0225216
Control	GC048	PWCNZ	PWCNZ D25	206	0	0	Aspiny	0.0108583
Control	GC048	PWCNZ	PWCNZ D25	207	0	0	Aspiny	0.0151785
Control	GC048	PWCNZ	PWCNZ D25	208	0	0	Aspiny	0.0148807
Control	GC048	PWCNZ	PWCNZ D25	209	0	0	Aspiny	0.00318567
Control	GC048	PWCNZ	PWCNZ D25	210	0	0	Aspiny	0.0220774
Control	GC048	PWCNZ	PWCNZ D25	211	0	0	Aspiny	0.0138627
Control	GC048	PWCNZ	PWCNZ D26	8	0	0	Aspiny	0.00356331
Control	GC048	PWCNZ	PWCNZ D26	9	0	0	Aspiny	0.00253367
Control	GC048	PWCNZ	PWCNZ D26	10	2	2	Spiny	0.00356944
Control	GC048	PWCNZ	PWCNZ D26	11	2	2	Spiny	0.00322655
Control	GC048	PWCNZ	PWCNZ D26	12	2	2	Spiny	0.00545571
Control	GC048	PWCNZ	PWCNZ D26	13	2	2	Spiny	0.00622433
Control	GC048	PWCNZ	PWCNZ D26	14	2	2	Spiny	0.00410397
Control	GC048	PWCNZ	PWCNZ D26	15	2	2	Spiny	0.00265365
Control	GC048	PWCNZ	PWCNZ D26	16	2	2	Spiny	0.00100286
Control	GC048	PWCNZ	PWCNZ D26	17	2	2	Spiny	0.00158224
Control	GC048	PWCNZ	PWCNZ D26	18	2	2	Spiny	0.00178917
Control	GC048	PWCNZ	PWCNZ D26	19	2	2	Spiny	0.00115024
Control	GC048	PWCNZ	PWCNZ D26	20	2	2	Spiny	0.00485534
Control	GC048	PWCNZ	PWCNZ D26	21	2	2	Spiny	0.00374907
Control	GC048	PWCNZ	PWCNZ D26	22	2	2	Spiny	0.00499315
Control	GC048	PWCNZ	PWCNZ D26	23	2	2	Spiny	0.00406411
Control	GC048	PWCNZ	PWCNZ D26	24	2	2	Spiny	0.00231214
Control	GC048	PWCNZ	PWCNZ D26	25	2	2	Spiny	0.00137586
Control	GC048	PWCNZ	PWCNZ D26	26	2	2	Spiny	0.000843156
Control	GC048	PWCNZ	PWCNZ D26	27	2	2	Spiny	0.00012905
Control	GC048	PWCNZ	PWCNZ D26	28	0	0	Aspiny	0.00200335
Control	GC048	PWCNZ	PWCNZ D26	29	0	0	Aspiny	0.00200335
Control	GC048	PWCNZ	PWCNZ D26	30	0	0	Aspiny	0.0156296
Control	GC048	PWCNZ	PWCNZ D26	31	0	0	Aspiny	0.0110104
Control	GC048	PWCNZ	PWCNZ D26	32	0	0	Aspiny	0.0199424
Control	GC048	PWCNZ	PWCNZ D26	33	0	0	Aspiny	0.0052921
Control	GC048	PWCNZ	PWCNZ D26	34	0	0	Aspiny	0.0162233
Control	GC048	PWCNZ	PWCNZ D26	35	0	0	Aspiny	0.0105286
Control	GC048	PWCNZ	PWCNZ D26	36	0	0	Aspiny	0.00831796
Control	GC048	PWCNZ	PWCNZ D26	37	0	0	Aspiny	0.0113215
Control	GC048	PWCNZ	PWCNZ D26	38	0	0	Aspiny	0.0109528
Control	GC048	PWCNZ	PWCNZ D26	39	0	0	Aspiny	0.00703016
Control	GC048	PWCNZ	PWCNZ D26	40	1	1	Spiny	0.00780144
Control	GC048	PWCNZ	PWCNZ D26	41	1	1	Spiny	0.0111029
Control	GC048	PWCNZ	PWCNZ D26	42	1	1	Spiny	0.0162141
Control	GC048	PWCNZ	PWCNZ D26	43	1	1	Spiny	0.0166267
Control	GC048	PWCNZ	PWCNZ D26	44	1	1	Spiny	0.0191575
Control	GC048	PWCNZ	PWCNZ D26	45	1	1	Spiny	0.021788
Control	GC048	PWCNZ	PWCNZ D26	46	0	0	Aspiny	0.026569
Control	GC048	PWCNZ	PWCNZ D26	47	0	0	Aspiny	0.0250009
Control	GC048	PWCNZ	PWCNZ D26	48	0	0	Aspiny	0.0299188
Control	GC048	PWCNZ	PWCNZ D26	49	0	0	Aspiny	0.0234751
Control	GC048	PWCNZ	PWCNZ D26	50	0	0	Aspiny	0.0110382
Control	GC048	PWCNZ	PWCNZ D26	51	0	0	Aspiny	0.0114724
Control	GC048	PWCNZ	PWCNZ D26	52	0	0	Aspiny	0.00611531
Control	GC048	PWCNZ	PWCNZ D26	53	0	0	Aspiny	0.00486109
Control	GC048	PWCNZ	PWCNZ D26	54	0	0	Aspiny	0.00236238
Control	GC048	PWCNZ	PWCNZ D26	55	0	0	Aspiny	0.0192485
Control	GC048	PWCNZ	PWCNZ D26	56	0	0	Aspiny	0.0124649
Control	GC048	PWCNZ	PWCNZ D26	57	0	0	Aspiny	0.0179864
Control	GC048	PWCNZ	PWCNZ D26	58	0	0	Aspiny	0.0134017
Control	GC048	PWCNZ	PWCNZ D26	59	0	0	Aspiny	0.012036
Control	GC048	PWCNZ	PWCNZ D26	60	0	0	Aspiny	0.00502533
Control	GC048	PWCNZ	PWCNZ D26	61	0	0	Aspiny	0.00413155
Control	GC048	PWCNZ	PWCNZ D26	62	0	0	Aspiny	0.00493347
Control	GC048	PWCNZ	PWCNZ D26	63	0	0	Aspiny	0.00611394
Control	GC048	PWCNZ	PWCNZ D26	64	0	0	Aspiny	0.00604937
Control	GC048	PWCNZ	PWCNZ D26	65	0	0	Aspiny	0.0027198
Control	GC048	PWCNZ	PWCNZ D26	66	0	0	Aspiny	0.0118128
Control	GC048	PWCNZ	PWCNZ D26	67	0	0	Aspiny	0.0087387
Control	GC048	PWCNZ	PWCNZ D26	68	0	0	Aspiny	0.0114054
Control	GC048	PWCNZ	PWCNZ D26	69	0	0	Aspiny	0.0126213
Control	GC048	PWCNZ	PWCNZ D26	70	0	0	Aspiny	0.0106988
Control	GC048	PWCNZ	PWCNZ D26	71	0	0	Aspiny	0.00769819
Control	GC048	PWCNZ	PWCNZ D26	72	0	0	Aspiny	0.0155175
Control	GC048	PWCNZ	PWCNZ D26	73	0	0	Aspiny	0.00874801
Control	GC048	PWCNZ	PWCNZ D26	74	0	0	Aspiny	0.00295916
Control	GC048	PWCNZ	PWCNZ D26	75	0	0	Aspiny	0.00541576
Control	GC048	PWCNZ	PWCNZ D26	76	0	0	Aspiny	0.00683328
Control	GC048	PWCNZ	PWCNZ D26	77	1	1	Spiny	0.00536345
Control	GC048	PWCNZ	PWCNZ D26	78	1	1	Spiny	0.023006
Control	GC048	PWCNZ	PWCNZ D26	79	1	1	Spiny	0.0163456
Control	GC048	PWCNZ	PWCNZ D26	80	1	1	Spiny	0.0181624
Control	GC048	PWCNZ	PWCNZ D26	81	1	1	Spiny	0.0143817
Control	GC048	PWCNZ	PWCNZ D26	82	0	0	Aspiny	0.0145122
Control	GC048	PWCNZ	PWCNZ D26	83	0	0	Aspiny	0.00942583
Control	GC048	PWCNZ	PWCNZ D26	84	0	0	Aspiny	0.00979902
Control	GC048	PWCNZ	PWCNZ D26	85	0	0	Aspiny	0.0108253
Control	GC048	PWCNZ	PWCNZ D26	86	0	0	Aspiny	0.019698
Control	GC048	PWCNZ	PWCNZ D26	87	0	0	Aspiny	0.0305067
Control	GC048	PWCNZ	PWCNZ D26	88	0	0	Aspiny	0.0300769
Control	GC048	PWCNZ	PWCNZ D26	89	0	0	Aspiny	0.037667
Control	GC048	PWCNZ	PWCNZ D26	90	0	0	Aspiny	0.0209808
Control	GC048	PWCNZ	PWCNZ D26	91	0	0	Aspiny	0.0184682
Control	GC048	PWCNZ	PWCNZ D26	92	0	0	Aspiny	0.0138131
Control	GC048	PWCNZ	PWCNZ D26	93	0	0	Aspiny	0.0133537
Control	GC048	PWCNZ	PWCNZ D26	94	0	0	Aspiny	0.00528156
Control	GC048	PWCNZ	PWCNZ D26	95	0	0	Aspiny	0.00496675
Control	GC048	PWCNZ	PWCNZ D26	96	0	0	Aspiny	0.0113206
Control	GC048	PWCNZ	PWCNZ D26	97	1	1	Spiny	0.0447073
Control	GC048	PWCNZ	PWCNZ D26	98	1	1	Spiny	0.0206027
Control	GC048	PWCNZ	PWCNZ D26	99	1	1	Spiny	0.0501163
Control	GC048	PWCNZ	PWCNZ D26	100	1	1	Spiny	0.0697037
Control	GC048	PWCNZ	PWCNZ D26	101	0	0	Aspiny	0.0446973
Control	GC048	PWCNZ	PWCNZ D26	102	0	0	Aspiny	0.0120017
Control	GC048	PWCNZ	PWCNZ D26	103	0	0	Aspiny	0.0064691
Control	GC048	PWCNZ	PWCNZ D26	104	0	0	Aspiny	0.00828301
Control	GC048	PWCNZ	PWCNZ D26	105	0	0	Aspiny	0.0047957
Control	GC048	PWCNZ	PWCNZ D26	106	0	0	Aspiny	0.0187942
Control	GC048	PWCNZ	PWCNZ D26	107	0	0	Aspiny	0.0061462
Control	GC048	PWCNZ	PWCNZ D26	108	0	0	Aspiny	0.00724093
Control	GC048	PWCNZ	PWCNZ D26	109	0	0	Aspiny	0.0164134
Control	GC048	PWCNZ	PWCNZ D26	110	0	0	Aspiny	0.0247425
Control	GC048	PWCNZ	PWCNZ D26	111	0	0	Aspiny	0.0104315
Control	GC048	PWCNZ	PWCNZ D26	112	0	0	Aspiny	0.00851929
Control	GC048	PWCNZ	PWCNZ D26	113	0	0	Aspiny	0.0141928
Control	GC048	PWCNZ	PWCNZ D26	114	0	0	Aspiny	0.0309434
Control	GC048	PWCNZ	PWCNZ D26	115	0	0	Aspiny	0.0304339
Control	GC048	PWCNZ	PWCNZ D26	116	0	0	Aspiny	0.0447477
Control	GC048	PWCNZ	PWCNZ D26	117	1	1	Spiny	0.0262176
Control	GC048	PWCNZ	PWCNZ D26	118	1	1	Spiny	0.0246938
Control	GC048	PWCNZ	PWCNZ D26	119	1	1	Spiny	0.0317295
Control	GC048	PWCNZ	PWCNZ D26	120	1	1	Spiny	0.0304633
Control	GC048	PWCNZ	PWCNZ D26	121	0	0	Aspiny	0.0230461
Control	GC048	PWCNZ	PWCNZ D26	122	0	0	Aspiny	0.0208152
Control	GC048	PWCNZ	PWCNZ D26	123	0	0	Aspiny	0.0234275
Control	GC048	PWCNZ	PWCNZ D26	124	0	0	Aspiny	0.0145138
Control	GC048	PWCNZ	PWCNZ D26	125	0	0	Aspiny	0.00773767
Control	GC048	PWCNZ	PWCNZ D26	126	0	0	Aspiny	0.00923256
Control	GC048	PWCNZ	PWCNZ D26	127	0	0	Aspiny	0.0154283
Control	GC048	PWCNZ	PWCNZ D26	128	0	0	Aspiny	0.0131421
Control	GC048	PWCNZ	PWCNZ D26	129	0	0	Aspiny	0.0126168
Control	GC048	PWCNZ	PWCNZ D26	130	0	0	Aspiny	0.0220456
Control	GC048	PWCNZ	PWCNZ D26	131	0	0	Aspiny	0.0143842
Control	GC048	PWCNZ	PWCNZ D26	132	0	0	Aspiny	0.0135384
Control	GC048	PWCNZ	PWCNZ D26	133	0	0	Aspiny	0.0131876
Control	GC048	PWCNZ	PWCNZ D26	134	0	0	Aspiny	0.00961267
Control	GC048	PWCNZ	PWCNZ D26	135	0	0	Aspiny	0.0110166
Control	GC048	PWCNZ	PWCNZ D26	136	0	0	Aspiny	0.00957738
Control	GC048	PWCNZ	PWCNZ D26	137	0	0	Aspiny	0.0176646
Control	GC048	PWCNZ	PWCNZ D26	138	0	0	Aspiny	0.0147962
Control	GC048	PWCNZ	PWCNZ D26	139	0	0	Aspiny	0.00690668
Control	GC048	PWCNZ	PWCNZ D26	140	0	0	Aspiny	0.00739959
Control	GC048	PWCNZ	PWCNZ D26	141	0	0	Aspiny	0.00798769
Control	GC048	PWCNZ	PWCNZ D26	142	0	0	Aspiny	0.0111089
Control	GC048	PWCNZ	PWCNZ D26	143	0	0	Aspiny	0.00403105
Control	GC048	PWCNZ	PWCNZ D26	144	0	0	Aspiny	0.00298546
Control	GC048	PWCNZ	PWCNZ D26	145	0	0	Aspiny	0.00237473
Control	GC048	PWCNZ	PWCNZ D26	146	0	0	Aspiny	0.00356154
Control	GC048	PWCNZ	PWCNZ D26	147	0	0	Aspiny	0.00106733
Control	GC048	PWCNZ	PWCNZ D26	148	1	1	Spiny	0.00599158
Control	GC048	PWCNZ	PWCNZ D26	149	1	1	Spiny	0.000671651
Control	GC048	PWCNZ	PWCNZ D26	150	1	1	Spiny	0.00970797
Control	GC048	PWCNZ	PWCNZ D26	151	1	1	Spiny	0.0525217
Control	GC048	PWCNZ	PWCNZ D26	152	1	1	Spiny	0.0214388
Control	GC048	PWCNZ	PWCNZ D26	153	1	1	Spiny	0.0330989
Control	GC048	PWCNZ	PWCNZ D26	154	1	1	Spiny	0.0231532
Control	GC048	PWCNZ	PWCNZ D26	155	0	0	Aspiny	0.0102407
Control	GC048	PWCNZ	PWCNZ D26	156	0	0	Aspiny	0.000778585
Control	GC048	PWCNZ	PWCNZ D26	157	0	0	Aspiny	0.00168794
Control	GC048	PWCNZ	PWCNZ D26	158	0	0	Aspiny	0.000583162
Control	GC048	PWCNZ	PWCNZ D26	159	0	0	Aspiny	0.000668925
Control	GC048	PWCNZ	PWCNZ D26	160	0	0	Aspiny	0.00187872
Control	GC048	PWCNZ	PWCNZ D26	161	0	0	Aspiny	0.00544914
Control	GC048	PWCNZ	PWCNZ D26	162	0	0	Aspiny	0.00220174
Control	GC048	PWCNZ	PWCNZ D26	163	0	0	Aspiny	0.000851043
Control	GC048	PWCNZ	PWCNZ D26	164	0	0	Aspiny	0.000976764
Control	GC048	PWCNZ	PWCNZ D26	165	0	0	Aspiny	0.00181782
Control	GC048	PWCNZ	PWCNZ D26	166	0	0	Aspiny	0.00106485
Control	GC048	PWCNZ	PWCNZ D26	167	0	0	Aspiny	0.00213747
Control	GC048	PWCNZ	PWCNZ D26	168	0	0	Aspiny	0.0034503
Control	GC048	PWCNZ	PWCNZ D26	169	0	0	Aspiny	0.00370335
Control	GC048	PWCNZ	PWCNZ D26	170	0	0	Aspiny	0.00378948
Control	GC048	PWCNZ	PWCNZ D26	171	0	0	Aspiny	0.0126337
Control	GC048	PWCNZ	PWCNZ D26	172	0	0	Aspiny	0.0148371
Control	GC048	PWCNZ	PWCNZ D26	173	0	0	Aspiny	0.0181286
Control	GC048	PWCNZ	PWCNZ D26	174	0	0	Aspiny	0.0220853
Control	GC048	PWCNZ	PWCNZ D26	175	0	0	Aspiny	0.0116244
Control	GC048	PWCNZ	PWCNZ D26	176	0	0	Aspiny	0.0188264
Control	GC048	PWCNZ	PWCNZ D26	177	1	1	Spiny	0.0293438
Control	GC048	PWCNZ	PWCNZ D26	178	1	1	Spiny	0.0340406
Control	GC048	PWCNZ	PWCNZ D26	179	1	1	Spiny	0.0367592
Control	GC048	PWCNZ	PWCNZ D26	180	1	1	Spiny	0.0181856
Control	GC048	PWCNZ	PWCNZ D26	181	1	1	Spiny	0.032796
Control	GC048	PWCNZ	PWCNZ D26	182	1	1	Spiny	0.0216214
Control	GC048	PWCNZ	PWCNZ D26	183	1	1	Spiny	0.0332098
Control	GC048	PWCNZ	PWCNZ D26	184	1	1	Spiny	0.029199
Control	GC048	PWCNZ	PWCNZ D26	185	1	1	Spiny	0.0177298
Control	GC048	PWCNZ	PWCNZ D26	186	0	0	Aspiny	0.0102579
Control	GC048	PWCNZ	PWCNZ D26	187	0	0	Aspiny	0.00951931
Control	GC048	PWCNZ	PWCNZ D26	188	0	0	Aspiny	0.0175748
Control	GC048	PWCNZ	PWCNZ D26	189	0	0	Aspiny	0.0133778
Control	GC048	PWCNZ	PWCNZ D26	190	0	0	Aspiny	0.0105296
Control	GC048	PWCNZ	PWCNZ D26	191	0	0	Aspiny	0.0115013
Control	GC048	PWCNZ	PWCNZ D26	192	0	0	Aspiny	0.00982122
Control	GC048	PWCNZ	PWCNZ D26	193	0	0	Aspiny	0.018739
Control	GC048	PWCNZ	PWCNZ D26	194	1	1	Spiny	0.0186754
Control	GC048	PWCNZ	PWCNZ D26	195	1	1	Spiny	0.00864954
Control	GC048	PWCNZ	PWCNZ D26	196	1	1	Spiny	0.00928046
Control	GC048	PWCNZ	PWCNZ D26	197	1	1	Spiny	0.0133886
Control	GC048	PWCNZ	PWCNZ D26	198	1	1	Spiny	0.00673321
Control	GC048	PWCNZ	PWCNZ D26	199	1	1	Spiny	0.00549179
LTP	GC046	FZYJV	FZYJV D17	16	1	1	Spiny	0.00648452
LTP	GC046	FZYJV	FZYJV D17	17	1	1	Spiny	0.00410243
LTP	GC046	FZYJV	FZYJV D17	18	0	0	Aspiny	0.0123125
LTP	GC046	FZYJV	FZYJV D17	19	0	0	Aspiny	0.00427954
LTP	GC046	FZYJV	FZYJV D17	20	0	0	Aspiny	0.00574221
LTP	GC046	FZYJV	FZYJV D17	21	0	0	Aspiny	0.00811
LTP	GC046	FZYJV	FZYJV D17	22	0	0	Aspiny	0.00785518
LTP	GC046	FZYJV	FZYJV D17	23	3	4	Spiny	0.0147683
LTP	GC046	FZYJV	FZYJV D17	24	3	4	Spiny	0.0243796
LTP	GC046	FZYJV	FZYJV D17	25	3	4	Spiny	0.0267395
LTP	GC046	FZYJV	FZYJV D17	26	3	4	Spiny	0.0171912
LTP	GC046	FZYJV	FZYJV D17	27	3	4	Spiny	0.00717261
LTP	GC046	FZYJV	FZYJV D17	28	3	4	Spiny	0.000517444
LTP	GC046	FZYJV	FZYJV D17	29	3	4	Spiny	0.00152182
LTP	GC046	FZYJV	FZYJV D17	30	3	4	Spiny	0.00334142
LTP	GC046	FZYJV	FZYJV D17	31	0	0	Aspiny	0.0107468
LTP	GC046	FZYJV	FZYJV D17	32	0	0	Aspiny	0.0170727
LTP	GC046	FZYJV	FZYJV D17	33	0	0	Aspiny	0.0163953
LTP	GC046	FZYJV	FZYJV D17	34	0	0	Aspiny	0.00705196
LTP	GC046	FZYJV	FZYJV D17	35	0	0	Aspiny	0.00569598
LTP	GC046	FZYJV	FZYJV D17	36	0	0	Aspiny	0.00713443
LTP	GC046	FZYJV	FZYJV D17	37	1	1	Spiny	0.00226614
LTP	GC046	FZYJV	FZYJV D17	38	1	1	Spiny	0.000970626
LTP	GC046	FZYJV	FZYJV D17	39	1	1	Spiny	0.000975535
LTP	GC046	FZYJV	FZYJV D17	40	1	1	Spiny	0.00257409
LTP	GC046	FZYJV	FZYJV D17	41	1	1	Spiny	0.00228905
LTP	GC046	FZYJV	FZYJV D17	42	1	1	Spiny	0.000821957
LTP	GC046	FZYJV	FZYJV D17	43	1	1	Spiny	0.000301517
LTP	GC046	FZYJV	FZYJV D17	44	1	1	Spiny	0
LTP	GC046	FZYJV	FZYJV D17	45	1	1	Spiny	0.000874735
LTP	GC046	FZYJV	FZYJV D17	46	0	0	Aspiny	0.0025335
LTP	GC046	FZYJV	FZYJV D17	47	0	0	Aspiny	0.00213643
LTP	GC046	FZYJV	FZYJV D17	48	0	0	Aspiny	0.00115486
LTP	GC046	FZYJV	FZYJV D17	49	0	0	Aspiny	0.000945599
LTP	GC046	FZYJV	FZYJV D17	50	0	0	Aspiny	0.000657267
LTP	GC046	FZYJV	FZYJV D17	51	1	1	Spiny	0.000601572
LTP	GC046	FZYJV	FZYJV D17	52	1	1	Spiny	0.00078161
LTP	GC046	FZYJV	FZYJV D17	53	1	1	Spiny	0.00150161
LTP	GC046	FZYJV	FZYJV D17	54	1	1	Spiny	0.00362678
LTP	GC046	FZYJV	FZYJV D17	55	1	1	Spiny	0.010515
LTP	GC046	FZYJV	FZYJV D17	56	0	0	Aspiny	0.0164159
LTP	GC046	FZYJV	FZYJV D17	57	0	0	Aspiny	0.0165525
LTP	GC046	FZYJV	FZYJV D17	58	0	0	Aspiny	0.0226753
LTP	GC046	FZYJV	FZYJV D17	59	0	0	Aspiny	0.0200819
LTP	GC046	FZYJV	FZYJV D17	60	0	0	Aspiny	0.00876525
LTP	GC046	FZYJV	FZYJV D17	61	0	0	Aspiny	0.00933368
LTP	GC046	FZYJV	FZYJV D17	62	0	0	Aspiny	0.00489755
LTP	GC046	FZYJV	FZYJV D17	63	0	0	Aspiny	0.00162582
LTP	GC046	FZYJV	FZYJV D17	64	0	0	Aspiny	0.0110342
LTP	GC046	FZYJV	FZYJV D17	65	0	0	Aspiny	0.00653091
LTP	GC046	FZYJV	FZYJV D17	66	0	0	Aspiny	0.00628426
LTP	GC046	FZYJV	FZYJV D17	67	0	0	Aspiny	0.0176167
LTP	GC046	FZYJV	FZYJV D17	68	0	0	Aspiny	0.0134343
LTP	GC046	FZYJV	FZYJV D17	69	0	0	Aspiny	0.0049548
LTP	GC046	FZYJV	FZYJV D17	70	0	0	Aspiny	0.00219043
LTP	GC046	FZYJV	FZYJV D17	71	0	0	Aspiny	0.00304928
LTP	GC046	FZYJV	FZYJV D17	72	0	0	Aspiny	0.00188646
LTP	GC046	FZYJV	FZYJV D17	73	0	0	Aspiny	0.0051448
LTP	GC046	FZYJV	FZYJV D17	74	0	0	Aspiny	0.0175497
LTP	GC046	FZYJV	FZYJV D17	75	0	0	Aspiny	0.0136499
LTP	GC046	FZYJV	FZYJV D17	76	0	0	Aspiny	0.021178
LTP	GC046	FZYJV	FZYJV D17	77	2	2	Spiny	0.0222374
LTP	GC046	FZYJV	FZYJV D17	78	2	2	Spiny	0.0283715
LTP	GC046	FZYJV	FZYJV D17	79	2	2	Spiny	0.0319791
LTP	GC046	FZYJV	FZYJV D17	80	2	2	Spiny	0.0342456
LTP	GC046	FZYJV	FZYJV D17	81	2	2	Spiny	0.0340969
LTP	GC046	FZYJV	FZYJV D17	82	2	2	Spiny	0.0194537
LTP	GC046	FZYJV	FZYJV D17	83	2	2	Spiny	0.0221521
LTP	GC046	FZYJV	FZYJV D17	84	2	2	Spiny	0.0185613
LTP	GC046	FZYJV	FZYJV D17	85	2	2	Spiny	0.0184466
LTP	GC046	FZYJV	FZYJV D17	86	2	2	Spiny	0.0197209
LTP	GC046	FZYJV	FZYJV D17	87	0	0	Aspiny	0.0185891
LTP	GC046	FZYJV	FZYJV D17	88	0	0	Aspiny	0.0162107
LTP	GC046	FZYJV	FZYJV D17	89	0	0	Aspiny	0.0182674
LTP	GC046	FZYJV	FZYJV D17	90	0	0	Aspiny	0.0188669
LTP	GC046	FZYJV	FZYJV D17	91	0	0	Aspiny	0.0296499
LTP	GC046	FZYJV	FZYJV D17	92	0	0	Aspiny	0.034739
LTP	GC046	FZYJV	FZYJV D17	93	0	0	Aspiny	0.00912953
LTP	GC046	FZYJV	FZYJV D17	94	0	0	Aspiny	0.00234968
LTP	GC046	FZYJV	FZYJV D17	95	1	1	Spiny	0.000943509
LTP	GC046	FZYJV	FZYJV D17	96	1	1	Spiny	0.00525188
LTP	GC046	FZYJV	FZYJV D17	97	0	0	Aspiny	0.00615478
LTP	GC046	FZYJV	FZYJV D17	98	0	0	Aspiny	0.000669223
LTP	GC046	FZYJV	FZYJV D17	99	0	0	Aspiny	0.00188342
LTP	GC046	FZYJV	FZYJV D17	100	0	0	Aspiny	0.00662565
LTP	GC046	FZYJV	FZYJV D17	101	0	0	Aspiny	0.00108017
LTP	GC046	FZYJV	FZYJV D17	102	0	0	Aspiny	0.000792385
LTP	GC046	FZYJV	FZYJV D17	103	0	0	Aspiny	0.00135174
LTP	GC046	FZYJV	FZYJV D17	104	0	0	Aspiny	0.000301622
LTP	GC046	FZYJV	FZYJV D17	105	0	0	Aspiny	0.00102073
LTP	GC046	FZYJV	FZYJV D17	106	2	3	Spiny	0.0229948
LTP	GC046	FZYJV	FZYJV D17	107	2	3	Spiny	0.016062
LTP	GC046	FZYJV	FZYJV D17	108	2	3	Spiny	0.0107467
LTP	GC046	FZYJV	FZYJV D17	109	2	3	Spiny	0.0255747
LTP	GC046	FZYJV	FZYJV D17	110	2	3	Spiny	0.0226372
LTP	GC046	FZYJV	FZYJV D17	111	2	3	Spiny	0.00794538
LTP	GC046	FZYJV	FZYJV D17	112	2	3	Spiny	0.00550186
LTP	GC046	FZYJV	FZYJV D17	113	2	3	Spiny	0.0054059
LTP	GC046	FZYJV	FZYJV D17	114	2	3	Spiny	0.00890177
LTP	GC046	FZYJV	FZYJV D17	115	0	0	Aspiny	0.000941751
LTP	GC046	FZYJV	FZYJV D17	116	0	0	Aspiny	0.0121978
LTP	GC046	FZYJV	FZYJV D17	117	0	0	Aspiny	0.0121751
LTP	GC046	FZYJV	FZYJV D17	118	0	0	Aspiny	0.00596697
LTP	GC046	FZYJV	FZYJV D17	119	0	0	Aspiny	0.0244988
LTP	GC046	FZYJV	FZYJV D17	120	0	0	Aspiny	0.0219197
LTP	GC046	FZYJV	FZYJV D17	121	0	0	Aspiny	0.0172895
LTP	GC046	FZYJV	FZYJV D17	122	0	0	Aspiny	0.0153804
LTP	GC046	FZYJV	FZYJV D17	123	0	0	Aspiny	0.0134325
LTP	GC046	FZYJV	FZYJV D17	124	0	0	Aspiny	0.00941195
LTP	GC046	FZYJV	FZYJV D17	125	2	2	Spiny	0.00215819
LTP	GC046	FZYJV	FZYJV D17	126	2	2	Spiny	0.000495043
LTP	GC046	FZYJV	FZYJV D17	127	2	2	Spiny	0.000565826
LTP	GC046	FZYJV	FZYJV D17	128	2	2	Spiny	0.0054535
LTP	GC046	FZYJV	FZYJV D17	129	2	2	Spiny	0.0227299
LTP	GC046	FZYJV	FZYJV D17	130	2	2	Spiny	0.00614166
LTP	GC046	FZYJV	FZYJV D17	131	2	2	Spiny	0.0114248
LTP	GC046	FZYJV	FZYJV D17	132	2	2	Spiny	0.00604285
LTP	GC046	FZYJV	FZYJV D17	133	0	0	Aspiny	0.0183696
LTP	GC046	FZYJV	FZYJV D17	134	0	0	Aspiny	0.0214935
LTP	GC046	FZYJV	FZYJV D17	135	0	0	Aspiny	0.0107637
LTP	GC046	FZYJV	FZYJV D17	136	0	0	Aspiny	0.00399467
LTP	GC046	FZYJV	FZYJV D17	137	0	0	Aspiny	0.000755377
LTP	GC046	FZYJV	FZYJV D17	138	0	0	Aspiny	0.00745539
LTP	GC046	FZYJV	FZYJV D17	139	0	0	Aspiny	0.0149852
LTP	GC046	FZYJV	FZYJV D17	140	0	0	Aspiny	0.0163161
LTP	GC046	FZYJV	FZYJV D17	141	0	0	Aspiny	0.00783709
LTP	GC046	FZYJV	FZYJV D17	142	0	0	Aspiny	0.00685281
LTP	GC046	FZYJV	FZYJV D17	143	0	0	Aspiny	0.0074176
LTP	GC046	FZYJV	FZYJV D17	144	2	2	Spiny	0.017396
LTP	GC046	FZYJV	FZYJV D17	145	2	2	Spiny	0.0130379
LTP	GC046	FZYJV	FZYJV D17	146	2	2	Spiny	0.0153174
LTP	GC046	FZYJV	FZYJV D17	147	2	2	Spiny	0.0178058
LTP	GC046	FZYJV	FZYJV D17	148	2	2	Spiny	0.0217925
LTP	GC046	FZYJV	FZYJV D17	149	1	1	Spiny	0.0155848
LTP	GC046	FZYJV	FZYJV D17	150	0	0	Aspiny	0.0278549
LTP	GC046	FZYJV	FZYJV D17	151	0	0	Aspiny	0.00596043
LTP	GC046	FZYJV	FZYJV D17	152	1	1	Spiny	0.0161876
LTP	GC046	FZYJV	FZYJV D17	153	1	1	Spiny	0.0240671
LTP	GC046	FZYJV	FZYJV D17	154	1	1	Spiny	0.0206566
LTP	GC046	FZYJV	FZYJV D17	155	0	0	Aspiny	0.0141925
LTP	GC046	FZYJV	FZYJV D17	156	0	0	Aspiny	0.0282664
LTP	GC046	FZYJV	FZYJV D17	157	0	0	Aspiny	0.0186241
LTP	GC046	FZYJV	FZYJV D17	158	2	2	Spiny	0.00231302
LTP	GC046	FZYJV	FZYJV D17	159	2	2	Spiny	0.000628811
LTP	GC046	FZYJV	FZYJV D17	160	2	2	Spiny	0.00350085
LTP	GC046	FZYJV	FZYJV D17	161	2	2	Spiny	0.0179876
LTP	GC046	FZYJV	FZYJV D17	162	2	2	Spiny	0.0150462
LTP	GC046	FZYJV	FZYJV D17	163	2	2	Spiny	0.00808553
LTP	GC046	FZYJV	FZYJV D17	164	2	2	Spiny	0.00986141
LTP	GC046	FZYJV	FZYJV D17	165	2	2	Spiny	0.00427651
LTP	GC046	FZYJV	FZYJV D17	166	2	2	Spiny	0.00610725
LTP	GC046	FZYJV	FZYJV D17	167	2	2	Spiny	0.0102812
LTP	GC046	FZYJV	FZYJV D17	168	2	2	Spiny	0.0197553
LTP	GC046	FZYJV	FZYJV D17	169	2	2	Spiny	0.0178377
LTP	GC046	FZYJV	FZYJV D17	170	2	2	Spiny	0.0206248
LTP	GC046	FZYJV	FZYJV D17	171	0	0	Aspiny	0.0153186
LTP	GC046	FZYJV	FZYJV D17	172	0	0	Aspiny	0.0117109
LTP	GC046	FZYJV	FZYJV D17	173	0	0	Aspiny	0.0115246
LTP	GC046	FZYJV	FZYJV D17	174	0	0	Aspiny	0.0185835
LTP	GC046	FZYJV	FZYJV D17	175	0	0	Aspiny	0.0285907
LTP	GC046	FZYJV	FZYJV D17	176	0	0	Aspiny	0.0193239
LTP	GC046	FZYJV	FZYJV D17	177	0	0	Aspiny	0.0203326
LTP	GC046	FZYJV	FZYJV D17	178	0	0	Aspiny	0.0159911
LTP	GC046	FZYJV	FZYJV D17	179	0	0	Aspiny	0.0125531
LTP	GC046	FZYJV	FZYJV D17	180	0	0	Aspiny	0.0125566
LTP	GC046	FZYJV	FZYJV D17	181	0	0	Aspiny	0.00836201
LTP	GC046	FZYJV	FZYJV D17	182	0	0	Aspiny	0.00977225
LTP	GC046	FZYJV	FZYJV D17	183	0	0	Aspiny	0.0132318
LTP	GC046	FZYJV	FZYJV D17	184	0	0	Aspiny	0.0108089
LTP	GC046	FZYJV	FZYJV D17	185	0	0	Aspiny	0.0132133
LTP	GC046	FZYJV	FZYJV D17	186	0	0	Aspiny	0.0143996
LTP	GC046	FZYJV	FZYJV D17	187	0	0	Aspiny	0.00957296
LTP	GC046	FZYJV	FZYJV D17	188	0	0	Aspiny	0.00957296
LTP	GC046	FZYJV	FZYJV D17	189	0	0	Aspiny	0.00612283
LTP	GC046	FZYJV	FZYJV D17	190	0	0	Aspiny	0.00603094
LTP	GC046	FZYJV	FZYJV D17	191	0	0	Aspiny	0.0157934
LTP	GC046	FZYJV	FZYJV D26	73	3	4	Spiny	0.00187546
LTP	GC046	FZYJV	FZYJV D26	74	3	4	Spiny	0.00142039
LTP	GC046	FZYJV	FZYJV D26	75	3	4	Spiny	0.0108416
LTP	GC046	FZYJV	FZYJV D26	76	3	4	Spiny	0.00227356
LTP	GC046	FZYJV	FZYJV D26	77	3	4	Spiny	0.00073095
LTP	GC046	FZYJV	FZYJV D26	78	3	4	Spiny	0.0019479
LTP	GC046	FZYJV	FZYJV D26	79	3	4	Spiny	0.0013305
LTP	GC046	FZYJV	FZYJV D26	80	3	4	Spiny	0.000762732
LTP	GC046	FZYJV	FZYJV D26	81	3	4	Spiny	0.000275528
LTP	GC046	FZYJV	FZYJV D26	82	3	4	Spiny	0.000331933
LTP	GC046	FZYJV	FZYJV D26	83	3	4	Spiny	0.000304214
LTP	GC046	FZYJV	FZYJV D26	84	3	4	Spiny	0.0010746
LTP	GC046	FZYJV	FZYJV D26	85	0	0	Aspiny	0.000158448
LTP	GC046	FZYJV	FZYJV D26	86	0	0	Aspiny	0.00545595
LTP	GC046	FZYJV	FZYJV D26	87	0	0	Aspiny	0.00575431
LTP	GC046	FZYJV	FZYJV D26	88	0	0	Aspiny	0.00545049
LTP	GC046	FZYJV	FZYJV D26	89	0	0	Aspiny	0.000846797
LTP	GC046	FZYJV	FZYJV D26	90	0	0	Aspiny	0.00190899
LTP	GC046	FZYJV	FZYJV D26	91	0	0	Aspiny	0.000698451
LTP	GC046	FZYJV	FZYJV D26	92	0	0	Aspiny	0.00243744
LTP	GC046	FZYJV	FZYJV D26	93	2	2	Spiny	0.00223341
LTP	GC046	FZYJV	FZYJV D26	94	2	2	Spiny	0.0168295
LTP	GC046	FZYJV	FZYJV D26	95	2	2	Spiny	0.0300206
LTP	GC046	FZYJV	FZYJV D26	96	2	2	Spiny	0.00968071
LTP	GC046	FZYJV	FZYJV D26	97	2	2	Spiny	0.000372478
LTP	GC046	FZYJV	FZYJV D26	98	2	2	Spiny	0.000610501
LTP	GC046	FZYJV	FZYJV D26	99	0	0	Aspiny	0.000343928
LTP	GC046	FZYJV	FZYJV D26	100	0	0	Aspiny	0.000520325
LTP	GC046	FZYJV	FZYJV D26	101	0	0	Aspiny	0.000459395
LTP	GC046	FZYJV	FZYJV D26	102	2	2	Spiny	0.000186411
LTP	GC046	FZYJV	FZYJV D26	103	2	2	Spiny	0.000608548
LTP	GC046	FZYJV	FZYJV D26	104	2	2	Spiny	0.000914375
LTP	GC046	FZYJV	FZYJV D26	105	2	2	Spiny	0.00307232
LTP	GC046	FZYJV	FZYJV D26	106	2	2	Spiny	0.00588784
LTP	GC046	FZYJV	FZYJV D26	107	2	2	Spiny	0.00750021
LTP	GC046	FZYJV	FZYJV D26	108	2	2	Spiny	0.00642445
LTP	GC046	FZYJV	FZYJV D26	109	2	2	Spiny	0.0124402
LTP	GC046	FZYJV	FZYJV D26	110	2	2	Spiny	0.0186284
LTP	GC046	FZYJV	FZYJV D26	111	2	2	Spiny	0.00556726
LTP	GC046	FZYJV	FZYJV D26	112	2	2	Spiny	0.00413502
LTP	GC046	FZYJV	FZYJV D26	113	0	0	Aspiny	0.00109665
LTP	GC046	FZYJV	FZYJV D26	114	0	0	Aspiny	0.00264344
LTP	GC046	FZYJV	FZYJV D26	115	0	0	Aspiny	0.000803206
LTP	GC046	FZYJV	FZYJV D26	116	3	3	Spiny	0.000533221
LTP	GC046	FZYJV	FZYJV D26	117	3	3	Spiny	0.0013631
LTP	GC046	FZYJV	FZYJV D26	118	3	3	Spiny	0.000501735
LTP	GC046	FZYJV	FZYJV D26	119	3	3	Spiny	0.0069059
LTP	GC046	FZYJV	FZYJV D26	120	3	3	Spiny	0.0170781
LTP	GC046	FZYJV	FZYJV D26	121	3	3	Spiny	0.00420972
LTP	GC046	FZYJV	FZYJV D26	122	3	3	Spiny	0.00510663
LTP	GC046	FZYJV	FZYJV D26	123	3	3	Spiny	0.00911513
LTP	GC046	FZYJV	FZYJV D26	124	3	3	Spiny	0.00770544
LTP	GC046	FZYJV	FZYJV D26	125	3	3	Spiny	0.000868067
LTP	GC046	FZYJV	FZYJV D26	126	3	3	Spiny	0.000339678
LTP	GC046	FZYJV	FZYJV D26	127	0	0	Aspiny	0.00751847
LTP	GC046	FZYJV	FZYJV D26	128	0	0	Aspiny	0.00821549
LTP	GC046	FZYJV	FZYJV D26	129	0	0	Aspiny	0.00229843
LTP	GC046	FZYJV	FZYJV D26	130	0	0	Aspiny	0.00187451
LTP	GC046	FZYJV	FZYJV D26	131	0	0	Aspiny	0.00106008
LTP	GC046	FZYJV	FZYJV D26	132	1	2	Spiny	0.00348543
LTP	GC046	FZYJV	FZYJV D26	133	1	2	Spiny	0.00431699
LTP	GC046	FZYJV	FZYJV D26	134	1	2	Spiny	0.00543042
LTP	GC046	FZYJV	FZYJV D26	135	1	2	Spiny	0.00211616
LTP	GC046	FZYJV	FZYJV D26	136	1	2	Spiny	0.000804995
LTP	GC046	FZYJV	FZYJV D26	137	1	2	Spiny	0.00233806
LTP	GC046	FZYJV	FZYJV D26	138	1	2	Spiny	0.0103256
LTP	GC046	FZYJV	FZYJV D26	139	1	2	Spiny	0.0258213
LTP	GC046	FZYJV	FZYJV D26	140	1	2	Spiny	0.00227704
LTP	GC046	FZYJV	FZYJV D26	141	0	0	Aspiny	0.00347574
LTP	GC046	FZYJV	FZYJV D26	142	0	0	Aspiny	0.00315476
LTP	GC046	FZYJV	FZYJV D26	143	0	0	Aspiny	0.00564818
LTP	GC046	FZYJV	FZYJV D26	144	0	0	Aspiny	0.0109229
LTP	GC046	FZYJV	FZYJV D26	145	0	0	Aspiny	0.026343
LTP	GC046	FZYJV	FZYJV D26	146	0	0	Aspiny	0.00926149
LTP	GC046	FZYJV	FZYJV D26	147	0	0	Aspiny	0.00607941
LTP	GC046	FZYJV	FZYJV D26	148	0	0	Aspiny	0.00972746
LTP	GC046	FZYJV	FZYJV D26	149	1	2	Spiny	0.00891959
LTP	GC046	FZYJV	FZYJV D26	150	1	2	Spiny	0.00183969
LTP	GC046	FZYJV	FZYJV D26	151	1	2	Spiny	0
LTP	GC046	FZYJV	FZYJV D26	152	1	2	Spiny	0
LTP	GC046	FZYJV	FZYJV D26	153	1	2	Spiny	0
LTP	GC046	FZYJV	FZYJV D26	154	1	2	Spiny	0
LTP	GC046	FZYJV	FZYJV D26	155	0	0	Aspiny	0
LTP	GC046	FZYJV	FZYJV D26	156	0	0	Aspiny	0
LTP	GC046	FZYJV	FZYJV D26	157	0	0	Aspiny	0
LTP	GC046	FZYJV	FZYJV D26	158	0	0	Aspiny	0.00219062
LTP	GC046	FZYJV	FZYJV D26	159	0	0	Aspiny	0.00532819
LTP	GC046	FZYJV	FZYJV D26	160	0	0	Aspiny	0.0051347
LTP	GC046	FZYJV	FZYJV D26	161	0	0	Aspiny	0.00102054
LTP	GC046	FZYJV	FZYJV D26	162	0	0	Aspiny	0.000133845
LTP	GC046	FZYJV	FZYJV D26	163	0	0	Aspiny	0.000700394
LTP	GC046	FZYJV	FZYJV D26	164	0	0	Aspiny	0.00097028
LTP	GC046	FZYJV	FZYJV D26	165	0	0	Aspiny	0.00421006
LTP	GC046	FZYJV	FZYJV D26	166	0	0	Aspiny	0.0061791
LTP	GC046	FZYJV	FZYJV D26	167	0	0	Aspiny	0.00762634
LTP	GC046	FZYJV	FZYJV D26	168	0	0	Aspiny	0.00833079
LTP	GC046	FZYJV	FZYJV D26	169	0	0	Aspiny	0.0109579
LTP	GC046	FZYJV	FZYJV D26	170	0	0	Aspiny	0.0057089
LTP	GC046	FZYJV	FZYJV D26	171	0	0	Aspiny	0.00729838
LTP	GC046	FZYJV	FZYJV D26	172	0	0	Aspiny	0.00618998
LTP	GC046	FZYJV	FZYJV D26	173	0	0	Aspiny	0.00459582
LTP	GC046	FZYJV	FZYJV D26	174	0	0	Aspiny	0.00330624
LTP	GC046	FZYJV	FZYJV D26	175	0	0	Aspiny	0.00472154
LTP	GC046	FZYJV	FZYJV D26	176	1	1	Spiny	0.00759482
LTP	GC046	FZYJV	FZYJV D26	177	1	1	Spiny	0.00453827
LTP	GC046	FZYJV	FZYJV D26	178	1	1	Spiny	0.00996789
LTP	GC046	FZYJV	FZYJV D26	179	1	1	Spiny	0.0122905
LTP	GC046	FZYJV	FZYJV D26	180	1	1	Spiny	0.0171907
LTP	GC046	FZYJV	FZYJV D26	181	1	1	Spiny	0.00787698
LTP	GC046	FZYJV	FZYJV D26	182	0	0	Aspiny	0.00608619
LTP	GC046	FZYJV	FZYJV D26	183	0	0	Aspiny	0.00228791
LTP	GC046	FZYJV	FZYJV D26	184	0	0	Aspiny	0.0127787
LTP	GC046	FZYJV	FZYJV D26	189	2	2	Spiny	0.00659746
LTP	GC046	FZYJV	FZYJV D26	190	2	2	Spiny	0.00659746
LTP	GC046	FZYJV	FZYJV D26	191	2	2	Spiny	0.00682382
LTP	GC046	FZYJV	FZYJV D26	192	2	2	Spiny	0.00251544
LTP	GC046	FZYJV	FZYJV D26	193	2	2	Spiny	0.00173648
LTP	GC046	FZYJV	FZYJV D26	194	2	2	Spiny	0.00125406
LTP	GC046	FZYJV	FZYJV D26	195	2	2	Spiny	0.00211639
LTP	GC046	FZYJV	FZYJV D26	196	2	2	Spiny	0.00252811
LTP	GC046	FZYJV	FZYJV D26	197	2	2	Spiny	0.00846111
LTP	GC046	FZYJV	FZYJV D26	198	2	2	Spiny	0.0120997
LTP	GC046	FZYJV	FZYJV D26	199	2	2	Spiny	0.0135488
LTP	GC046	FZYJV	FZYJV D26	200	2	2	Spiny	0.0138842
LTP	GC046	FZYJV	FZYJV D26	201	0	0	Aspiny	0.00966861
LTP	GC046	FZYJV	FZYJV D26	202	0	0	Aspiny	0.0101213
LTP	GC046	FZYJV	FZYJV D28	16	0	0	Aspiny	0.0173215
LTP	GC046	FZYJV	FZYJV D28	17	0	0	Aspiny	0.01407
LTP	GC046	FZYJV	FZYJV D28	18	0	0	Aspiny	0.00466058
LTP	GC046	FZYJV	FZYJV D28	19	0	0	Aspiny	0.00466223
LTP	GC046	FZYJV	FZYJV D28	20	0	0	Aspiny	0.00936468
LTP	GC046	FZYJV	FZYJV D28	21	0	0	Aspiny	0.00614703
LTP	GC046	FZYJV	FZYJV D28	22	0	0	Aspiny	0.00368799
LTP	GC046	FZYJV	FZYJV D28	23	0	0	Aspiny	0.00274981
LTP	GC046	FZYJV	FZYJV D28	24	0	0	Aspiny	0.0113652
LTP	GC046	FZYJV	FZYJV D28	25	0	0	Aspiny	0.0112876
LTP	GC046	FZYJV	FZYJV D28	26	0	0	Aspiny	0.00187408
LTP	GC046	FZYJV	FZYJV D28	27	0	0	Aspiny	0.000765652
LTP	GC046	FZYJV	FZYJV D28	28	0	0	Aspiny	0.00162922
LTP	GC046	FZYJV	FZYJV D28	29	0	0	Aspiny	0.0048985
LTP	GC046	FZYJV	FZYJV D28	30	4	4	Spiny	0.00489582
LTP	GC046	FZYJV	FZYJV D28	31	4	4	Spiny	0.00248764
LTP	GC046	FZYJV	FZYJV D28	32	4	4	Spiny	0.0144568
LTP	GC046	FZYJV	FZYJV D28	33	4	4	Spiny	0.0130493
LTP	GC046	FZYJV	FZYJV D28	34	4	4	Spiny	0.0167676
LTP	GC046	FZYJV	FZYJV D28	35	4	4	Spiny	0.0141441
LTP	GC046	FZYJV	FZYJV D28	36	4	4	Spiny	0.00843157
LTP	GC046	FZYJV	FZYJV D28	37	0	0	Aspiny	0.0025171
LTP	GC046	FZYJV	FZYJV D28	38	0	0	Aspiny	0.00453937
LTP	GC046	FZYJV	FZYJV D28	39	0	0	Aspiny	0.00592759
LTP	GC046	FZYJV	FZYJV D28	40	0	0	Aspiny	0.00988282
LTP	GC046	FZYJV	FZYJV D28	41	0	0	Aspiny	0.00751687
LTP	GC046	FZYJV	FZYJV D28	42	0	0	Aspiny	0.00751126
LTP	GC046	FZYJV	FZYJV D28	43	0	0	Aspiny	0.0144589
LTP	GC046	FZYJV	FZYJV D28	44	0	0	Aspiny	0.00864864
LTP	GC046	FZYJV	FZYJV D28	45	0	0	Aspiny	0.00664234
LTP	GC046	FZYJV	FZYJV D28	46	2	2	Spiny	0.00787332
LTP	GC046	FZYJV	FZYJV D28	47	2	2	Spiny	0.0142392
LTP	GC046	FZYJV	FZYJV D28	48	2	2	Spiny	0.0193183
LTP	GC046	FZYJV	FZYJV D28	49	2	2	Spiny	0.00991236
LTP	GC046	FZYJV	FZYJV D28	50	2	2	Spiny	0.00396495
LTP	GC046	FZYJV	FZYJV D28	51	2	2	Spiny	0.0060089
LTP	GC046	FZYJV	FZYJV D28	52	2	2	Spiny	0.00776236
LTP	GC046	FZYJV	FZYJV D28	53	0	0	Aspiny	0.0159315
LTP	GC046	FZYJV	FZYJV D28	54	0	0	Aspiny	0.0152756
LTP	GC046	FZYJV	FZYJV D28	55	0	0	Aspiny	0.0124485
LTP	GC046	FZYJV	FZYJV D28	56	0	0	Aspiny	0.0156682
LTP	GC046	FZYJV	FZYJV D28	57	0	0	Aspiny	0.00824182
LTP	GC046	FZYJV	FZYJV D28	58	0	0	Aspiny	0.00711015
LTP	GC046	FZYJV	FZYJV D28	59	0	0	Aspiny	0.00367621
LTP	GC046	FZYJV	FZYJV D28	60	0	0	Aspiny	0.00179789
LTP	GC046	FZYJV	FZYJV D28	61	0	0	Aspiny	0.00104601
LTP	GC046	FZYJV	FZYJV D28	62	0	0	Aspiny	0.00041965
LTP	GC046	FZYJV	FZYJV D28	63	0	0	Aspiny	0
LTP	GC046	FZYJV	FZYJV D28	64	0	0	Aspiny	0
LTP	GC046	FZYJV	FZYJV D28	65	0	0	Aspiny	0
LTP	GC046	FZYJV	FZYJV D28	66	0	0	Aspiny	0
LTP	GC046	FZYJV	FZYJV D28	67	0	0	Aspiny	0
LTP	GC046	FZYJV	FZYJV D28	68	0	0	Aspiny	0
LTP	GC046	FZYJV	FZYJV D28	69	0	0	Aspiny	0
LTP	GC046	FZYJV	FZYJV D28	70	0	0	Aspiny	0
LTP	GC046	FZYJV	FZYJV D28	71	0	0	Aspiny	0
LTP	GC046	FZYJV	FZYJV D28	72	1	1	Spiny	0
LTP	GC046	FZYJV	FZYJV D28	73	1	1	Spiny	0.00280016
LTP	GC046	FZYJV	FZYJV D28	74	0	0	Aspiny	0.0019157
LTP	GC046	FZYJV	FZYJV D28	75	0	0	Aspiny	0.00245411
LTP	GC046	FZYJV	FZYJV D28	76	0	0	Aspiny	0.00158419
LTP	GC046	FZYJV	FZYJV D28	77	0	0	Aspiny	0.00613959
LTP	GC046	FZYJV	FZYJV D28	78	0	0	Aspiny	0.00712879
LTP	GC046	FZYJV	FZYJV D28	79	0	0	Aspiny	0.0087319
LTP	GC046	FZYJV	FZYJV D28	80	1	1	Spiny	0.00719896
LTP	GC046	FZYJV	FZYJV D28	81	1	1	Spiny	0.0133727
LTP	GC046	FZYJV	FZYJV D28	82	1	1	Spiny	0.0114274
LTP	GC046	FZYJV	FZYJV D28	83	1	1	Spiny	0.00951547
LTP	GC046	FZYJV	FZYJV D28	84	1	1	Spiny	0.00694223
LTP	GC046	FZYJV	FZYJV D28	85	1	1	Spiny	0.00402702
LTP	GC046	FZYJV	FZYJV D28	86	1	1	Spiny	0.00371622
LTP	GC046	FZYJV	FZYJV D28	87	0	0	Aspiny	0.0012001
LTP	GC046	FZYJV	FZYJV D28	88	0	0	Aspiny	0.00165577
LTP	GC046	FZYJV	FZYJV D28	89	0	0	Aspiny	0.00134085
LTP	GC046	FZYJV	FZYJV D28	90	0	0	Aspiny	0.000997267
LTP	GC046	FZYJV	FZYJV D28	91	0	0	Aspiny	0.00066922
LTP	GC046	FZYJV	FZYJV D28	92	0	0	Aspiny	0.000261652
LTP	GC046	FZYJV	FZYJV D28	93	0	0	Aspiny	0.00160945
LTP	GC046	FZYJV	FZYJV D28	94	0	0	Aspiny	0.00228281
LTP	GC046	FZYJV	FZYJV D28	95	0	0	Aspiny	0.00299026
LTP	GC046	FZYJV	FZYJV D28	96	0	0	Aspiny	0.000632179
LTP	GC046	FZYJV	FZYJV D28	97	0	0	Aspiny	0.00127197
LTP	GC046	FZYJV	FZYJV D28	98	0	0	Aspiny	0
LTP	GC046	FZYJV	FZYJV D28	99	0	0	Aspiny	0
LTP	GC046	FZYJV	FZYJV D28	100	2	2	Spiny	0.000990594
LTP	GC046	FZYJV	FZYJV D28	101	2	2	Spiny	0.0195616
LTP	GC046	FZYJV	FZYJV D28	102	2	2	Spiny	0.00640009
LTP	GC046	FZYJV	FZYJV D28	103	2	2	Spiny	0.00300554
LTP	GC046	FZYJV	FZYJV D28	104	2	2	Spiny	0.00540873
LTP	GC046	FZYJV	FZYJV D28	105	2	2	Spiny	0.00659515
LTP	GC046	FZYJV	FZYJV D28	106	2	2	Spiny	0.00527871
LTP	GC046	FZYJV	FZYJV D28	107	2	2	Spiny	0.00567917
LTP	GC046	FZYJV	FZYJV D28	108	2	2	Spiny	0.00686528
LTP	GC046	FZYJV	FZYJV D28	109	2	2	Spiny	0.00503949
LTP	GC046	FZYJV	FZYJV D28	110	2	2	Spiny	0.00300634
LTP	GC046	FZYJV	FZYJV D28	111	2	2	Spiny	0.00412776
LTP	GC046	FZYJV	FZYJV D28	112	2	2	Spiny	0.00735561
LTP	GC046	FZYJV	FZYJV D28	113	0	0	Aspiny	0.00735958
LTP	GC046	FZYJV	FZYJV D28	114	0	0	Aspiny	0.0047091
LTP	GC046	FZYJV	FZYJV D28	115	0	0	Aspiny	0.0107371
LTP	GC046	FZYJV	FZYJV D28	116	0	0	Aspiny	0.0113773
LTP	GC046	FZYJV	FZYJV D28	117	0	0	Aspiny	0.00637962
LTP	GC046	FZYJV	FZYJV D28	118	0	0	Aspiny	0.00900528
LTP	GC046	FZYJV	FZYJV D28	119	0	0	Aspiny	0.00612217
LTP	GC046	FZYJV	FZYJV D28	120	0	0	Aspiny	0.00587448
LTP	GC046	FZYJV	FZYJV D28	121	1	1	Spiny	0.00442771
LTP	GC046	FZYJV	FZYJV D28	122	0	0	Aspiny	0.0225671
LTP	GC046	FZYJV	FZYJV D28	123	0	0	Aspiny	0.0284667
LTP	GC046	FZYJV	FZYJV D28	124	0	0	Aspiny	0.0178576
LTP	GC046	FZYJV	FZYJV D28	125	0	0	Aspiny	0.0209175
LTP	GC046	FZYJV	FZYJV D28	126	0	0	Aspiny	0.0183405
LTP	GC046	FZYJV	FZYJV D28	127	0	0	Aspiny	0.0163326
LTP	GC046	FZYJV	FZYJV D28	128	0	0	Aspiny	0.0177573
LTP	GC046	FZYJV	FZYJV D28	129	0	0	Aspiny	0.0170126
LTP	GC046	FZYJV	FZYJV D28	130	0	0	Aspiny	0.00887205
LTP	GC046	FZYJV	FZYJV D28	131	0	0	Aspiny	0.00818898
LTP	GC046	FZYJV	FZYJV D28	132	0	0	Aspiny	0.00575236
LTP	GC046	FZYJV	FZYJV D28	133	0	0	Aspiny	0.0041989
LTP	GC046	FZYJV	FZYJV D28	134	0	0	Aspiny	0.000847468
LTP	GC046	FZYJV	FZYJV D28	135	0	0	Aspiny	0.000558588
LTP	GC046	FZYJV	FZYJV D28	136	0	0	Aspiny	0.00198971
LTP	GC046	FZYJV	FZYJV D28	137	0	0	Aspiny	0.00737775
LTP	GC046	FZYJV	FZYJV D28	138	0	0	Aspiny	0.0105212
LTP	GC046	FZYJV	FZYJV D28	139	0	0	Aspiny	0.00931487
LTP	GC046	FZYJV	FZYJV D28	140	0	0	Aspiny	0.0458042
LTP	GC046	FZYJV	FZYJV D28	141	0	0	Aspiny	0.0301396
LTP	GC046	FZYJV	FZYJV D28	142	0	0	Aspiny	0.0154427
LTP	GC046	FZYJV	FZYJV D28	143	0	0	Aspiny	0.0131206
LTP	GC046	FZYJV	FZYJV D28	144	0	0	Aspiny	0.00757712
LTP	GC046	FZYJV	FZYJV D28	145	0	0	Aspiny	0.0108051
LTP	GC046	FZYJV	FZYJV D28	146	0	0	Aspiny	0.00468865
LTP	GC046	FZYJV	FZYJV D28	147	0	0	Aspiny	0.00672679
LTP	GC046	FZYJV	FZYJV D28	148	0	0	Aspiny	0.0084052
LTP	GC046	FZYJV	FZYJV D28	149	1	1	Spiny	0.00798586
LTP	GC046	FZYJV	FZYJV D28	150	1	1	Spiny	0.00298862
LTP	GC046	FZYJV	FZYJV D28	151	1	1	Spiny	0.00493994
LTP	GC046	FZYJV	FZYJV D30	14	3	3	Spiny	0.00153238
LTP	GC046	FZYJV	FZYJV D30	15	3	3	Spiny	0.00112767
LTP	GC046	FZYJV	FZYJV D30	16	3	3	Spiny	0.00168892
LTP	GC046	FZYJV	FZYJV D30	17	3	3	Spiny	0.0046805
LTP	GC046	FZYJV	FZYJV D30	18	3	3	Spiny	0.000698759
LTP	GC046	FZYJV	FZYJV D30	19	3	3	Spiny	0.000818949
LTP	GC046	FZYJV	FZYJV D30	20	3	3	Spiny	0.00127029
LTP	GC046	FZYJV	FZYJV D30	21	3	3	Spiny	0.00911774
LTP	GC046	FZYJV	FZYJV D30	22	3	3	Spiny	0.00908892
LTP	GC046	FZYJV	FZYJV D30	24				0.00208334
LTP	GC046	FZYJV	FZYJV D30	25				0.0139264
LTP	GC046	FZYJV	FZYJV D30	26				0.0149342
LTP	GC046	FZYJV	FZYJV D30	27				0.0129781
LTP	GC046	FZYJV	FZYJV D30	28				0.0182299
LTP	GC046	FZYJV	FZYJV D30	29				0.01335
LTP	GC046	FZYJV	FZYJV D30	30				0.0125984
LTP	GC046	FZYJV	FZYJV D30	31				0.00463121
LTP	GC046	FZYJV	FZYJV D30	32				0.00707431
LTP	GC046	FZYJV	FZYJV D30	33	3	3	Spiny	0.00957098
LTP	GC046	FZYJV	FZYJV D30	34	3	3	Spiny	0.017557
LTP	GC046	FZYJV	FZYJV D30	35	3	3	Spiny	0.0189774
LTP	GC046	FZYJV	FZYJV D30	36	3	3	Spiny	0.0121657
LTP	GC046	FZYJV	FZYJV D30	37	3	3	Spiny	0.00995007
LTP	GC046	FZYJV	FZYJV D30	38	3	3	Spiny	0.00253901
LTP	GC046	FZYJV	FZYJV D30	39	3	3	Spiny	0.000974393
LTP	GC046	FZYJV	FZYJV D30	40	3	3	Spiny	0.00257631
LTP	GC046	FZYJV	FZYJV D30	41	3	3	Spiny	0.00540037
LTP	GC046	FZYJV	FZYJV D30	42	3	3	Spiny	0.0197069
LTP	GC046	FZYJV	FZYJV D30	43	3	3	Spiny	0.0148929
LTP	GC046	FZYJV	FZYJV D30	44	3	3	Spiny	0.00579908
LTP	GC046	FZYJV	FZYJV D30	45	3	3	Spiny	0.00225587
LTP	GC046	FZYJV	FZYJV D30	46	3	3	Spiny	0.00353784
LTP	GC046	FZYJV	FZYJV D30	47	3	3	Spiny	0.00435434
LTP	GC046	FZYJV	FZYJV D30	48	3	3	Spiny	0.0117525
LTP	GC046	FZYJV	FZYJV D30	49	3	3	Spiny	0.0111389
LTP	GC046	FZYJV	FZYJV D30	50				0.0226979
LTP	GC046	FZYJV	FZYJV D30	56	1	2	Spiny	0.00952084
LTP	GC046	FZYJV	FZYJV D30	57	1	2	Spiny	0.00359828
LTP	GC046	FZYJV	FZYJV D30	58	1	2	Spiny	0.00408886
LTP	GC046	FZYJV	FZYJV D30	59	1	2	Spiny	0.021741
LTP	GC046	FZYJV	FZYJV D30	60	1	2	Spiny	0.00941406
LTP	GC046	FZYJV	FZYJV D30	61	1	2	Spiny	0.00180022
LTP	GC046	FZYJV	FZYJV D30	62	1	2	Spiny	0.011666
LTP	GC046	FZYJV	FZYJV D30	63	1	2	Spiny	0.00811993
LTP	GC046	FZYJV	FZYJV D30	64	0	0	Aspiny	0.0187566
LTP	GC046	FZYJV	FZYJV D30	65	0	0	Aspiny	0.0210951
LTP	GC046	FZYJV	FZYJV D30	66	0	0	Aspiny	0.0219981
LTP	GC046	FZYJV	FZYJV D30	67	0	0	Aspiny	0.0117074
LTP	GC046	FZYJV	FZYJV D30	68	0	0	Aspiny	0.0206708
LTP	GC046	FZYJV	FZYJV D30	69	0	0	Aspiny	0.0190821
LTP	GC046	FZYJV	FZYJV D30	70	0	0	Aspiny	0.0226229
LTP	GC046	FZYJV	FZYJV D30	71	0	0	Aspiny	0.00611438
LTP	GC046	FZYJV	FZYJV D30	72	0	0	Aspiny	0.00302857
LTP	GC046	FZYJV	FZYJV D30	73	0	0	Aspiny	0.00168379
LTP	GC046	FZYJV	FZYJV D30	74	0	0	Aspiny	0.00770267
LTP	GC046	FZYJV	FZYJV D30	75	0	0	Aspiny	0.00583835
LTP	GC046	FZYJV	FZYJV D30	76	1	1	Spiny	0.00287528
LTP	GC046	FZYJV	FZYJV D30	77	1	1	Spiny	0.00176859
LTP	GC046	FZYJV	FZYJV D30	78	0	0	Aspiny	0.00377912
LTP	GC046	FZYJV	FZYJV D30	79	0	0	Aspiny	0.00437736
LTP	GC046	FZYJV	FZYJV D30	80	1	2	Spiny	0.00940831
LTP	GC046	FZYJV	FZYJV D30	81	1	2	Spiny	0.0119488
LTP	GC046	FZYJV	FZYJV D30	82	1	2	Spiny	0.00538754
LTP	GC046	FZYJV	FZYJV D30	83	1	2	Spiny	0.00194536
LTP	GC046	FZYJV	FZYJV D30	84	1	2	Spiny	0.00109055
LTP	GC046	FZYJV	FZYJV D30	85	1	2	Spiny	0.00052497
LTP	GC046	FZYJV	FZYJV D30	86	0	0	Aspiny	0.00100057
LTP	GC046	FZYJV	FZYJV D30	87	0	0	Aspiny	0.000307357
LTP	GC046	FZYJV	FZYJV D30	88	1	1	Spiny	0.00053689
LTP	GC046	FZYJV	FZYJV D30	89	1	1	Spiny	0.00116616
LTP	GC046	FZYJV	FZYJV D30	90	1	1	Spiny	0.00104801
LTP	GC046	FZYJV	FZYJV D30	91	1	1	Spiny	0.000618282
LTP	GC046	FZYJV	FZYJV D30	92	0	0	Aspiny	0.00124761
LTP	GC046	FZYJV	FZYJV D30	93	0	0	Aspiny	0.00187532
LTP	GC046	FZYJV	FZYJV D30	94	0	0	Aspiny	0.00544003
LTP	GC046	FZYJV	FZYJV D30	95	0	0	Aspiny	0.00482757
LTP	GC046	FZYJV	FZYJV D30	96	6	6	Spiny	0.00551853
LTP	GC046	FZYJV	FZYJV D30	97	6	6	Spiny	0.000891822
LTP	GC046	FZYJV	FZYJV D30	98	6	6	Spiny	0.000851271
LTP	GC046	FZYJV	FZYJV D30	99	6	6	Spiny	0.000532502
LTP	GC046	FZYJV	FZYJV D30	100	6	6	Spiny	0.00142449
LTP	GC046	FZYJV	FZYJV D30	101	6	6	Spiny	0
LTP	GC046	FZYJV	FZYJV D30	102	6	6	Spiny	0
LTP	GC046	FZYJV	FZYJV D30	103	6	6	Spiny	0
LTP	GC046	FZYJV	FZYJV D30	104	6	6	Spiny	0
LTP	GC046	FZYJV	FZYJV D30	105	6	6	Spiny	0
LTP	GC046	FZYJV	FZYJV D30	106	6	6	Spiny	0
LTP	GC046	FZYJV	FZYJV D30	107	6	6	Spiny	0
LTP	GC046	FZYJV	FZYJV D30	108	6	6	Spiny	0
LTP	GC046	FZYJV	FZYJV D30	109	6	6	Spiny	0
LTP	GC046	FZYJV	FZYJV D30	110	6	6	Spiny	0
LTP	GC046	FZYJV	FZYJV D30	111	6	6	Spiny	0
LTP	GC046	FZYJV	FZYJV D30	112	6	6	Spiny	0
LTP	GC046	FZYJV	FZYJV D30	113	0	0	Aspiny	0
LTP	GC046	FZYJV	FZYJV D30	114	0	0	Aspiny	0
LTP	GC046	FZYJV	FZYJV D30	115	0	0	Aspiny	0
LTP	GC046	FZYJV	FZYJV D30	116	1	1	Spiny	0
LTP	GC046	FZYJV	FZYJV D30	117	1	1	Spiny	0
LTP	GC046	FZYJV	FZYJV D30	118	1	1	Spiny	0
LTP	GC046	FZYJV	FZYJV D30	119	0	0	Aspiny	0
LTP	GC046	FZYJV	FZYJV D30	120	0	0	Aspiny	0
LTP	GC046	FZYJV	FZYJV D30	121	0	0	Aspiny	0
LTP	GC046	FZYJV	FZYJV D30	122	0	0	Aspiny	0
LTP	GC046	FZYJV	FZYJV D30	123	0	0	Aspiny	0
LTP	GC046	FZYJV	FZYJV D30	124	0	0	Aspiny	0
LTP	GC046	FZYJV	FZYJV D30	125	0	0	Aspiny	0
LTP	GC046	FZYJV	FZYJV D30	126	0	0	Aspiny	0
LTP	GC046	FZYJV	FZYJV D30	127	1	2	Spiny	0
LTP	GC046	FZYJV	FZYJV D30	128	1	2	Spiny	0
LTP	GC046	FZYJV	FZYJV D30	129	1	2	Spiny	0
LTP	GC046	FZYJV	FZYJV D30	130	1	2	Spiny	0
LTP	GC046	FZYJV	FZYJV D30	131	1	2	Spiny	0
LTP	GC046	FZYJV	FZYJV D30	132	0	0	Aspiny	0
[truncated: 799 more rows]

## Sheet: Summary Statistics
Fig3C	Shaft SER Surface Area / um
	SS	Degr. Of Freedom	MS	F	p
Intercept	5.59918	1	5.59918	454.953	6.57049e-11
tiss	0.0477928	1	0.0477928	3.88333	0.0722797
Experiment	0.134648	1	0.134648	10.9406	0.00625144
tiss*experiment	0.00367308	1	0.00367308	0.298451	0.594867
Error	0.147686	12	0.0123072
NOTE: "DECODE"=CON vs LTP
SS Condition / (SS Condition + SS Error) = effect size
Effect size:
Eta squared	0.244491
DECODE	Mean	Std Err	-0.95	0.95	N
control	0.646218	0.0592538	0.506105	0.786332	8
TBS	0.536911	0.039953	0.442437	0.631385	8
Fig 3D	Shaft SER Volume / um
	SS	Degr. Of Freedom	MS	F	p
Intercept	0.00134922	1	0.00134922	342.019	3.47253e-10
tiss	2.54039e-05	1	2.54039e-05	6.43973	0.02605
Experiment	2.58351e-05	1	2.58351e-05	6.54906	0.0250424
tiss*experiment	1.96452e-07	1	1.96452e-07	0.0497995	0.827166
Error	4.73384e-05	12	3.94487e-06
NOTE: "DECODE"=CON vs LTP
SS Condition / (SS Condition + SS Error) = effect size
Effect size:
Eta squared	0.349231
DECODE	Mean	Std Err	-0.95	0.95	N
control	0.010443	0.000920099	0.0082673	0.0126187	8
TBS	0.00792287	0.000680879	0.00631285	0.00953289	8
Fig 3E	Shaft SER x-section area / um : CONTROL Aspiny < Spiny						Fig 3E	Shaft SER x-section area / um : LTP Aspiny < Spiny						Fig 3E	Shaft SER x-section area / um : Aspiny LTP vs Control						Fig 3E	Shaft SER x-section area / um : Spiny LTP vs Control
	SS	Degr. Of Freedom	MS	F	p			SS	Degr. Of Freedom	MS	F	p			SS	Degr. Of Freedom	MS	F	p			SS	Degr. Of Freedom	MS	F	p
Intercept	0.181354	1	0.181354	2021.34	0		Intercept	0.0932638	1	0.0932638	1526.87	0		Intercept	0.115998	1	0.115998	1858.38	0		Intercept	0.150649	1	0.150649	1606.8	0
Experiment	0.00806779	1	0.00806779	89.9225	0		Experiment	0.00133954	1	0.00133954	21.9303	3.1181e-06		(1)Experiment	0.0017791	1	0.0017791	28.5026	1.07325e-07		(1)Experiment	0.000394316	1	0.000394316	4.20571	0.0405065
Dendrite(Experiment)	0.0115798	6	0.00192997	21.5112	0		Dendrite(Experiment)	0.00391161	6	0.000651934	10.6731	1.31152e-11		Tissue Type(Experiment)	0.00112041	1	0.00112041	17.9499	2.40024e-05		Tissue Type(Experiment)	0.00660724	1	0.00660724	70.4718	1.11022e-16
3(1*2)	0.00651808	7	0.000931154	10.3785	9.31921e-13		3(1*2)	0.00202788	7	0.000289697	4.74277	2.82141e-05		3(1*2)	0.00384519	12	0.000320432	5.13357	1.74437e-08		3(1*2)	0.0143647	12	0.00119706	12.7676	0
Aspiny vs Spiny	0.004636	1	0.004636	51.6722	1.05227e-12		Aspiny vs Spiny	0.00107105	1	0.00107105	17.5346	3.00767e-05		(2)Tissue Type	0.00187201	1	0.00187201	29.9911	5.049e-08		(2)Tissue Type	0.00485148	1	0.00485148	51.7452	1.11444e-12
Error	0.128478	1432	8.97194e-05				Error	0.0808722	1324	6.10818e-05				Error	0.0976856	1565	6.24189e-05				Error	0.111665	1191	9.37572e-05
NOTE: "DECODE"=CON vs LTP							NOTE: "DECODE"=CON vs LTP							NOTE: "DECODE"=CON vs LTP							NOTE: "DECODE"=CON vs LTP
SS Condition / (SS Condition + SS Error) = effect size							SS Condition / (SS Condition + SS Error) = effect size							SS Condition / (SS Condition + SS Error) = effect size							SS Condition / (SS Condition + SS Error) = effect size
Effect size:							Effect size:							Effect size:							Effect size:
Eta squared	0.0348272						Eta squared	0.0130706						Eta squared	0.0188033						Eta squared	0.0416378
DECODE	Mean	Std Err	minus stderr	plus stderr	N		DECODE	Mean	Std Err	minus 95%	plus 95%	N		DECODE	Mean	Std Err	minus stderr	plus stderr	N		DECODE	Mean	Std Err	minus stderr	plus stderr	N
Spiny	0.0131934	0.000570136	0.0126232	0.0137635	493		Spiny	0.00990907	0.000322132	0.00927663	0.0105415	714		Control	0.0101876	0.000276483	0.00991111	0.0104641	955		Control	0.0131934	0.000570136	0.0126232	0.0137635	493
Aspiny	0.0101876	0.000276483	0.00991111	0.0104641	955		Aspiny	0.00806435	0.000301616	0.00747205	0.00865665	626		LTP	0.00806435	0.000301616	0.00776274	0.00836597	626		LTP	0.00990907	0.000322132	0.00958694	0.0102312	714
