# Supplementary material for: Structural plasticity of dendritic secretory compartments during LTP-induced synaptogenesis
Source: eLife journal article supplement (doi:10.7554/elife.46356), 2019-08-21
Supplement: supp [file elife-46356-supp-v1.zip › elife_poa_e46356_Figure_4_source_data_1.xlsx]

## Sheet: Sheet1
Fig4A	Series	Dendrite	Section	Condition
	FZYJV	d28	110	LTP
Fig4B	Series	Dendrite	Section
	DCPBM	d25	122	LTP
Fig4C	Series	Dendrite	Section
	PWCNZ	d26	42	Control
Fig4D	Series	Dendrite	Section
	DCPBM	d35	27	LTP
Fig4E	Series	Dendrite	Section
	FZYJV	d17	146	LTP
Fig4F	Series	Dendrite	Section
	FXBVK	d69	177	Control
