# Supplementary material for: Structural plasticity of dendritic secretory compartments during LTP-induced synaptogenesis
Source: eLife journal article supplement (doi:10.7554/elife.46356), 2019-08-21
Supplement: supp [file elife-46356-supp-v1.zip › elife_poa_e46356_Figure_5_source_data_1.xlsx]

## Sheet: Fig5A
Fig5A	Condition	Series	Dendrite	Sample Image Sections
	CON	FXBVK	d23	95-97
	LTP	DCPBM	d35	186-188

## Sheet: Fig5B
Condition	Experiment	Series	Dendrite	Segment#	First Section	Last Section	#Sections	Cluster thickness	# Sp in Segment	# Syn in Segment	Aspiny vs. Spiny	TOTAL # endos	TOTAL # CONSTRUCTIVE (all minus deg)	AV	SV	CP/CV/LV	RC	SC	Deg	TOTAL # endos/um	TOTAL # CONSTRUCTIVE (all minus deg)/um	AV/um	SV/um	CP/CV/LV /um	RC/um	SC/um	Deg/um
Control	GC048	PWCNZ	PWCNZD07	Segment2	39	41	3	0.168	1	1	Spiny	0	0	0	0	0	0	0	0	0	0	0	0	0	0	0	0
Control	GC048	PWCNZ	PWCNZD07	Segment4	57	60	4	0.224	1	1	Spiny	2.81667	1.75	0	0	0	0	1.75	1.06667	12.5744	7.8125	0	0	0	0	7.8125	4.7619
Control	GC048	PWCNZ	PWCNZD07	Segment6	82	90	9	0.504	1	1	Spiny	2.6	2	0	0	2	0	0	0.6	5.15873	3.96825	0	0	3.96825	0	0	1.19048
Control	GC048	PWCNZ	PWCNZD07	Segment8	135	152	18	1.008	3	3	Spiny	1	1	0	1	0	0	0	0	0.992063	0.992063	0	0.992063	0	0	0	0
Control	GC048	PWCNZ	PWCNZD07	Segment10	192	199	8	0.448	1	1	Spiny	0	0	0	0	0	0	0	0	0	0	0	0	0	0	0	0
Control	GC048	PWCNZ	PWCNZD07	Segment1	7	38	32	1.792	1	1	Aspiny	1	1	0	1	0	0	0	0	0.558036	0.558036	0	0.558036	0	0	0	0
Control	GC048	PWCNZ	PWCNZD07	Segment3	42	56	15	0.84	0	0	Aspiny	4.18333	3.25	0	3	0	0	0.25	0.933333	4.98016	3.86905	0	3.57143	0	0	0.297619	1.11111
Control	GC048	PWCNZ	PWCNZD07	Segment5	77	81	21	1.176	0	0	Aspiny	0.4	0	0	0	0	0	0	0.4	0.340136	0	0	0	0	0	0	0.340136
Control	GC048	PWCNZ	PWCNZD07	Segment7	91	134	44	2.464	0	0	Aspiny	4	3	0	0	1	2	0	1	1.62338	1.21753	0	0	0.405844	0.811688	0	0.405844
Control	GC048	PWCNZ	PWCNZD07	Segment9	153	191	39	2.184	0	0	Aspiny	0	0	0	0	0	0	0	0	0	0	0	0	0	0	0	0
Control	GC048	PWCNZ	PWCNZD11	Segment1	7	11	5	0.28	1	1	Spiny	0	0	0	0	0	0	0	0	0	0	0	0	0	0	0	0
Control	GC048	PWCNZ	PWCNZD11	Segment3	15	19	5	0.28	1	1	Spiny	0.416667	0.416667	0	0	0	0	0.416667	0	1.4881	1.4881	0	0	0	0	1.4881	0
Control	GC048	PWCNZ	PWCNZD11	Segment5	36	46	11	0.616	3	3	Spiny	2.98039	2	0	0	2	0	0	0.980392	4.8383	3.24675	0	0	3.24675	0	0	1.59155
Control	GC048	PWCNZ	PWCNZD11	Segment7	56	57	2	0.112	1	1	Spiny	0.0952381	0	0	0	0	0	0	0.0952381	0.85034	0	0	0	0	0	0	0.85034
Control	GC048	PWCNZ	PWCNZD11	Segment9	64	68	5	0.28	1	1	Spiny	1	1	0	1	0	0	0	0	3.57143	3.57143	0	3.57143	0	0	0	0
Control	GC048	PWCNZ	PWCNZD11	Segment11	78	82	5	0.28	1	1	Spiny	0.333333	0	0	0	0	0	0	0.333333	1.19048	0	0	0	0	0	0	1.19048
Control	GC048	PWCNZ	PWCNZD11	Segment13	133	142	10	0.56	2	2	Spiny	5.30455	4.85	0	0	2.5	0	2.35	0.454545	9.4724	8.66071	0	0	4.46429	0	4.19643	0.811688
Control	GC048	PWCNZ	PWCNZD11	Segment17	178	183	6	0.336	1	1	Spiny	0	0	0	0	0	0	0	0	0	0	0	0	0	0	0	0
Control	GC048	PWCNZ	PWCNZD11	Segment15	145	149	5	0.28	1	1	Spiny	0.227273	0	0	0	0	0	0	0.227273	0.811688	0	0	0	0	0	0	0.811688
Control	GC048	PWCNZ	PWCNZD11	Segment2	12	14	3	0.168	0	0	Aspiny	0.166667	0.166667	0	0	0	0	0.166667	0	0.992063	0.992063	0	0	0	0	0.992063	0
Control	GC048	PWCNZ	PWCNZD11	Segment4	20	24	5	0.28	0	0	Aspiny	0.416667	0.416667	0	0	0	0	0.416667	0	1.4881	1.4881	0	0	0	0	1.4881	0
Control	GC048	PWCNZ	PWCNZD11	Segment6	47	55	9	0.504	0	0	Aspiny	0.781513	0	0	0	0	0	0	0.781513	1.55062	0	0	0	0	0	0	1.55062
Control	GC048	PWCNZ	PWCNZD11	Segment8	58	63	6	0.336	0	0	Aspiny	0.142857	0	0	0	0	0	0	0.142857	0.42517	0	0	0	0	0	0	0.42517
Control	GC048	PWCNZ	PWCNZD11	Segment10	69	77	9	0.504	0	0	Aspiny	0.666667	0	0	0	0	0	0	0.666667	1.32275	0	0	0	0	0	0	1.32275
Control	GC048	PWCNZ	PWCNZD11	Segment12	83	132	50	2.8	0	0	Aspiny	10.15	10.15	0	0	0.5	0	9.65	0	3.625	3.625	0	0	0.178571	0	3.44643	0
Control	GC048	PWCNZ	PWCNZD11	Segment14	143	144	2	0.112	0	0	Aspiny	0.0909091	0	0	0	0	0	0	0.0909091	0.811688	0	0	0	0	0	0	0.811688
Control	GC048	PWCNZ	PWCNZD11	Segment16	150	177	28	1.568	0	0	Aspiny	1.22727	1	0	0	1	0	0	0.227273	0.782699	0.637755	0	0	0.637755	0	0	0.144944
Control	GC048	PWCNZ	PWCNZD11	Segment18	184	209	26	1.456	0	0	Aspiny	1	0	0	0	0	0	0	1	0.686813	0	0	0	0	0	0	0.686813
Control	GC048	PWCNZ	PWCNZD25	Segment2	17	31	15	0.84	1	1	Spiny	0	0	0	0	0	0	0	0	0	0	0	0	0	0	0	0
Control	GC048	PWCNZ	PWCNZD25	Segment4	35	46	12	0.672	1	1	Spiny	0	0	0	0	0	0	0	0	0	0	0	0	0	0	0	0
Control	GC048	PWCNZ	PWCNZD25	Segment7	86	97	12	0.672	2	2	Spiny	1	1	0	0	0	1	0	0	1.4881	1.4881	0	0	0	1.4881	0	0
Control	GC048	PWCNZ	PWCNZD25	Segment9	139	146	8	0.448	1	1	Spiny	1.25806	1	0	1	0	0	0	0.258065	2.80818	2.23214	0	2.23214	0	0	0	0.576037
Control	GC048	PWCNZ	PWCNZD25	Segment11	149	167	19	1.064	3	4	Spiny	4.45161	4	0	0	1	3	0	0.451613	4.18385	3.7594	0	0	0.93985	2.81955	0	0.424448
Control	GC048	PWCNZ	PWCNZD25	Segment13	185	188	4	0.224	1	1	Spiny	0	0	0	0	0	0	0	0	0	0	0	0	0	0	0	0
Control	GC048	PWCNZ	PWCNZD25	Segment1	7	16	10	0.56	0	0	Aspiny	1	1	0	0	1	0	0	0	1.78571	1.78571	0	0	1.78571	0	0	0
Control	GC048	PWCNZ	PWCNZD25	Segment3	32	34	3	0.168	0	0	Aspiny	0	0	0	0	0	0	0	0	0	0	0	0	0	0	0	0
Control	GC048	PWCNZ	PWCNZD25	Segment5	47	57	11	0.616	0	0	Aspiny	0	0	0	0	0	0	0	0	0	0	0	0	0	0	0	0
Control	GC048	PWCNZ	PWCNZD25	Segment6	67	76	19	1.064	0	0	Aspiny	6	5	0	0	0	0	5	1	5.6391	4.69925	0	0	0	0	4.69925	0.93985
Control	GC048	PWCNZ	PWCNZD25	Segment8	98	138	41	2.296	0	0	Aspiny	2.22581	1	0	0	1	0	0	1.22581	0.969428	0.43554	0	0	0.43554	0	0	0.533888
Control	GC048	PWCNZ	PWCNZD25	Segment10	147	148	2	0.112	0	0	Aspiny	0.0645161	0	0	0	0	0	0	0.0645161	0.576037	0	0	0	0	0	0	0.576037
Control	GC048	PWCNZ	PWCNZD25	Segment12	168	184	17	0.952	0	0	Aspiny	1	1	0	0	0	1	0	0	1.05042	1.05042	0	0	0	1.05042	0	0
Control	GC048	PWCNZ	PWCNZD25	Segment14	189	211	23	1.288	0	0	Aspiny	1	0	0	0	0	0	0	1	0.776398	0	0	0	0	0	0	0.776398
Control	GC048	PWCNZ	PWCNZD26	Segment2	10	27	18	1.008	2	2	Spiny	1.48649	1	0	1	0	0	0	0.486486	1.47469	0.992063	0	0.992063	0	0	0	0.482625
Control	GC048	PWCNZ	PWCNZD26	Segment4	40	45	6	0.336	1	1	Spiny	3.33156	3.19643	0	0	0	0	3.19643	0.135135	9.91537	9.51318	0	0	0	0	9.51318	0.402188
Control	GC048	PWCNZ	PWCNZD26	Segment6	77	81	5	0.28	1	1	Spiny	0	0	0	0	0	0	0	0	0	0	0	0	0	0	0	0
Control	GC048	PWCNZ	PWCNZD26	Segment8	97	100	4	0.224	1	1	Spiny	0	0	0	0	0	0	0	0	0	0	0	0	0	0	0	0
Control	GC048	PWCNZ	PWCNZD26	Segment10	117	120	4	0.224	1	1	Spiny	1.14286	1	0	0	0	1	0	0.142857	5.10204	4.46429	0	0	0	4.46429	0	0.637755
Control	GC048	PWCNZ	PWCNZD26	Segment12	148	154	7	0.392	1	1	Spiny	0	0	0	0	0	0	0	0	0	0	0	0	0	0	0	0
Control	GC048	PWCNZ	PWCNZD26	Segment14	177	185	9	0.504	1	1	Spiny	0	0	0	0	0	0	0	0	0	0	0	0	0	0	0	0
Control	GC048	PWCNZ	PWCNZD26	Segment16	194	199	6	0.336	1	1	Spiny	0	0	0	0	0	0	0	0	0	0	0	0	0	0	0	0
Control	GC048	PWCNZ	PWCNZD26	Segment1	8	9	2	0.112	0	0	Aspiny	0.0540541	0	0	0	0	0	0	0.0540541	0.482625	0	0	0	0	0	0	0.482625
Control	GC048	PWCNZ	PWCNZD26	Segment3	28	39	12	0.672	0	0	Aspiny	8.3279	6.00357	0	1	2	0	3.00357	2.32432	12.3927	8.93389	0	1.4881	2.97619	0	4.4696	3.45882
Control	GC048	PWCNZ	PWCNZD26	Segment5	46	76	31	1.736	0	0	Aspiny	1.8	1.8	0	1	0	0	0.8	0	1.03687	1.03687	0	0.576037	0	0	0.460829	0
Control	GC048	PWCNZ	PWCNZD26	Segment7	82	96	15	0.84	0	0	Aspiny	1	0	0	0	0	0	0	1	1.19048	0	0	0	0	0	0	1.19048
Control	GC048	PWCNZ	PWCNZD26	Segment9	101	116	16	0.896	0	0	Aspiny	0.428571	0	0	0	0	0	0	0.428571	0.478316	0	0	0	0	0	0	0.478316
Control	GC048	PWCNZ	PWCNZD26	Segment11	121	147	27	1.512	0	0	Aspiny	0.428571	0	0	0	0	0	0	0.428571	0.283447	0	0	0	0	0	0	0.283447
Control	GC048	PWCNZ	PWCNZD26	Segment13	155	176	22	1.232	0	0	Aspiny	0	0	0	0	0	0	0	0	0	0	0	0	0	0	0	0
Control	GC048	PWCNZ	PWCNZD26	Segment15	186	193	8	0.448	0	0	Aspiny	0	0	0	0	0	0	0	0	0	0	0	0	0	0	0	0
Control	GC046	FXBVK	FXBVKD20	Segment1	41	46	6	0.378	1	1	Spiny	1	1	0	1	0	0	0	0	2.6455	2.6455	0	2.6455	0	0	0	0
Control	GC046	FXBVK	FXBVKD20	Segment3	54	62	9	0.567	1	1	Spiny	0.0952381	0	0	0	0	0	0	0.0952381	0.167968	0	0	0	0	0	0	0.167968
Control	GC046	FXBVK	FXBVKD20	Segment5	71	72	2	0.126	1	1	Spiny	1.09524	1	0	1	0	0	0	0.0952381	8.69237	7.93651	0	7.93651	0	0	0	0.755858
Control	GC046	FXBVK	FXBVKD20	Segment7	76	84	9	0.567	2	2	Spiny	2.28571	2	0	0	2	0	0	0.285714	4.03124	3.52734	0	0	3.52734	0	0	0.503905
Control	GC046	FXBVK	FXBVKD20	Segment9	89	92	4	0.252	1	1	Spiny	0	0	0	0	0	0	0	0	0	0	0	0	0	0	0	0
Control	GC046	FXBVK	FXBVKD20	Segment11	105	107	3	0.189	1	1	Spiny	0	0	0	0	0	0	0	0	0	0	0	0	0	0	0	0
Control	GC046	FXBVK	FXBVKD20	Segment13	117	120	4	0.252	1	1	Spiny	0	0	0	0	0	0	0	0	0	0	0	0	0	0	0	0
Control	GC046	FXBVK	FXBVKD20	Segment15	134	139	6	0.378	1	1	Spiny	1.5	1.5	0	1	0.5	0	0	0	3.96825	3.96825	0	2.6455	1.32275	0	0	0
Control	GC046	FXBVK	FXBVKD20	Segment17	147	155	9	0.567	2	2	Spiny	1	0	0	0	0	0	0	1	1.76367	0	0	0	0	0	0	1.76367
Control	GC046	FXBVK	FXBVKD20	Segment19	162	164	3	0.189	1	1	Spiny	0	0	0	0	0	0	0	0	0	0	0	0	0	0	0	0
Control	GC046	FXBVK	FXBVKD20	Segment23	185	194	10	0.63	2	2	Spiny	1	1	0	1	0	0	0	0	1.5873	1.5873	0	1.5873	0	0	0	0
Control	GC046	FXBVK	FXBVKD20	Segment25	206	211	6	0.378	1	1	Spiny	2.33333	1	0	0	1	0	0	1.33333	6.17284	2.6455	0	0	2.6455	0	0	3.52734
Control	GC046	FXBVK	FXBVKD20	Segment2	47	53	7	0.441	0	0	Aspiny	0	0	0	0	0	0	0	0	0	0	0	0	0	0	0	0
Control	GC046	FXBVK	FXBVKD20	Segment4	63	70	8	0.504	0	0	Aspiny	4.38095	4	0	0	4	0	0	0.380952	8.69237	7.93651	0	0	7.93651	0	0	0.755858
Control	GC046	FXBVK	FXBVKD20	Segment6	73	75	3	0.189	0	0	Aspiny	0.142857	0	0	0	0	0	0	0.142857	0.755858	0	0	0	0	0	0	0.755858
Control	GC046	FXBVK	FXBVKD20	Segment8	85	88	4	0.252	0	0	Aspiny	0	0	0	0	0	0	0	0	0	0	0	0	0	0	0	0
Control	GC046	FXBVK	FXBVKD20	Segment10	93	104	12	0.756	0	0	Aspiny	1	0	0	0	0	0	0	1	1.32275	0	0	0	0	0	0	1.32275
Control	GC046	FXBVK	FXBVKD20	Segment12	108	116	9	0.567	0	0	Aspiny	0	0	0	0	0	0	0	0	0	0	0	0	0	0	0	0
Control	GC046	FXBVK	FXBVKD20	Segment14	121	133	13	0.819	0	0	Aspiny	0.5	0.5	0	0	0.5	0	0	0	0.610501	0.610501	0	0	0.610501	0	0	0
Control	GC046	FXBVK	FXBVKD20	Segment16	140	146	7	0.441	0	0	Aspiny	0	0	0	0	0	0	0	0	0	0	0	0	0	0	0	0
Control	GC046	FXBVK	FXBVKD20	Segment18	156	161	6	0.378	0	0	Aspiny	0	0	0	0	0	0	0	0	0	0	0	0	0	0	0	0
Control	GC046	FXBVK	FXBVKD20	Segment20	165	184	20	1.26	0	0	Aspiny	1	1	0	1	0	0	0	0	0.793651	0.793651	0	0.793651	0	0	0	0
Control	GC046	FXBVK	FXBVKD20	Segment24	195	205	11	0.693	0	0	Aspiny	1	1	0	0	0	1	0	0	1.443	1.443	0	0	0	1.443	0	0
Control	GC046	FXBVK	FXBVKD20	Segment26	212	215	4	0.252	0	0	Aspiny	1.66667	1	0	1	0	0	0	0.666667	6.61376	3.96825	0	3.96825	0	0	0	2.6455
Control	GC046	FXBVK	FXBVKD23	Segment1	51	55	5	0.315	1	1	Spiny	0	0	0	0	0	0	0	0	0	0	0	0	0	0	0	0
Control	GC046	FXBVK	FXBVKD23	Segment3	76	80	5	0.315	1	1	Spiny	1	1	0	1	0	0	0	0	3.1746	3.1746	0	3.1746	0	0	0	0
Control	GC046	FXBVK	FXBVKD23	Segment5	91	100	10	0.63	1	1	Spiny	0	0	0	0	0	0	0	0	0	0	0	0	0	0	0	0
Control	GC046	FXBVK	FXBVKD23	Segment7	105	107	3	0.189	1	1	Spiny	0.633333	0.3	0	0	0	0	0.3	0.333333	3.35097	1.5873	0	0	0	0	1.5873	1.76367
Control	GC046	FXBVK	FXBVKD23	Segment9	110	115	6	0.378	1	1	Spiny	6.74444	6.3	0	0	2	0	4.3	0.444444	17.8424	16.6667	0	0	5.29101	0	11.3757	1.17578
Control	GC046	FXBVK	FXBVKD23	Segment11	125	131	7	0.441	1	1	Spiny	0	0	0	0	0	0	0	0	0	0	0	0	0	0	0	0
Control	GC046	FXBVK	FXBVKD23	Segment13	135	140	6	0.378	1	1	Spiny	1	1	0	0	0	1	0	0	2.6455	2.6455	0	0	0	2.6455	0	0
Control	GC046	FXBVK	FXBVKD23	Segment15	158	161	4	0.252	1	1	Spiny	0	0	0	0	0	0	0	0	0	0	0	0	0	0	0	0
Control	GC046	FXBVK	FXBVKD23	Segment17	167	169	3	0.189	1	1	Spiny	0	0	0	0	0	0	0	0	0	0	0	0	0	0	0	0
Control	GC046	FXBVK	FXBVKD23	Segment19	199	210	12	0.756	2	2	Spiny	1	1	0	0	1	0	0	0	1.32275	1.32275	0	0	1.32275	0	0	0
Control	GC046	FXBVK	FXBVKD23	Segment2	56	75	20	1.26	0	0	Aspiny	1	1	0	1	0	0	0	0	0.793651	0.793651	0	0.793651	0	0	0	0
Control	GC046	FXBVK	FXBVKD23	Segment4	81	90	10	0.63	0	0	Aspiny	0	0	0	0	0	0	0	0	0	0	0	0	0	0	0	0
Control	GC046	FXBVK	FXBVKD23	Segment6	101	104	4	0.252	0	0	Aspiny	0.2	0.2	0	0	0	0	0.2	0	0.793651	0.793651	0	0	0	0	0.793651	0
Control	GC046	FXBVK	FXBVKD23	Segment8	108	109	2	0.126	0	0	Aspiny	0.422222	0.2	0	0	0	0	0.2	0.222222	3.35097	1.5873	0	0	0	0	1.5873	1.76367
Control	GC046	FXBVK	FXBVKD23	Segment10	116	124	9	0.567	0	0	Aspiny	3	3	0	0	0	0	3	0	5.29101	5.29101	0	0	0	0	5.29101	0
Control	GC046	FXBVK	FXBVKD23	Segment12	132	134	3	0.189	0	0	Aspiny	0	0	0	0	0	0	0	0	0	0	0	0	0	0	0	0
Control	GC046	FXBVK	FXBVKD23	Segment14	141	157	17	1.071	0	0	Aspiny	3	3	0	0	0	0	3	0	2.80112	2.80112	0	0	0	0	2.80112	0
Control	GC046	FXBVK	FXBVKD23	Segment16	162	166	5	0.315	0	0	Aspiny	0	0	0	0	0	0	0	0	0	0	0	0	0	0	0	0
Control	GC046	FXBVK	FXBVKD23	Segment18	170	198	29	1.827	0	0	Aspiny	0	0	0	0	0	0	0	0	0	0	0	0	0	0	0	0
Control	GC046	FXBVK	FXBVKD23	Segment20	211	217	7	0.441	0	0	Aspiny	0	0	0	0	0	0	0	0	0	0	0	0	0	0	0	0
Control	GC046	FXBVK	FXBVKD61	Segment1	41	52	12	0.756	3	3	Spiny	2	1	0	0	1	0	0	1	2.6455	1.32275	0	0	1.32275	0	0	1.32275
Control	GC046	FXBVK	FXBVKD61	Segment3	58	63	6	0.378	2	2	Spiny	0	0	0	0	0	0	0	0	0	0	0	0	0	0	0	0
Control	GC046	FXBVK	FXBVKD61	Segment5	75	80	6	0.378	1	1	Spiny	1	0	0	0	0	0	0	1	2.6455	0	0	0	0	0	0	2.6455
Control	GC046	FXBVK	FXBVKD61	Segment7	91	95	5	0.315	1	1	Spiny	0.222222	0	0	0	0	0	0	0.222222	0.705467	0	0	0	0	0	0	0.705467
Control	GC046	FXBVK	FXBVKD61	Segment9	115	122	8	0.504	1	1	Spiny	2	2	0	0	1	1	0	0	3.96825	3.96825	0	0	1.98413	1.98413	0	0
Control	GC046	FXBVK	FXBVKD61	Segment11	125	127	3	0.189	1	1	Spiny	0	0	0	0	0	0	0	0	0	0	0	0	0	0	0	0
Control	GC046	FXBVK	FXBVKD61	Segment13	132	140	9	0.567	2	2	Spiny	2	1	0	0	1	0	0	1	3.52734	1.76367	0	0	1.76367	0	0	1.76367
Control	GC046	FXBVK	FXBVKD61	Segment15	153	155	3	0.189	1	1	Spiny	0.2	0	0	0	0	0	0	0.2	1.0582	0	0	0	0	0	0	1.0582
Control	GC046	FXBVK	FXBVKD61	Segment17	164	165	2	0.126	1	1	Spiny	1	1	0	1	0	0	0	0	7.93651	7.93651	0	7.93651	0	0	0	0
Control	GC046	FXBVK	FXBVKD61	Segment19	171	175	5	0.315	1	1	Spiny	0	0	0	0	0	0	0	0	0	0	0	0	0	0	0	0
Control	GC046	FXBVK	FXBVKD61	Segment21	183	183	5	0.315	1	1	Spiny	0.0714286	0	0	0	0	0	0	0.0714286	0.226757	0	0	0	0	0	0	0.226757
Control	GC046	FXBVK	FXBVKD61	Segment22	189	201	13	0.819	1	1	Spiny	1.57143	1	0	1	0	0	0	0.571429	1.91872	1.221	0	1.221	0	0	0	0.697715
Control	GC046	FXBVK	FXBVKD61	Segment2	53	57	5	0.315	0	0	Aspiny	1	1	0	1	0	0	0	0	3.1746	3.1746	0	3.1746	0	0	0	0
Control	GC046	FXBVK	FXBVKD61	Segment4	64	74	11	0.693	0	0	Aspiny	0	0	0	0	0	0	0	0	0	0	0	0	0	0	0	0
Control	GC046	FXBVK	FXBVKD61	Segment6	81	90	10	0.63	0	0	Aspiny	0.777778	0	0	0	0	0	0	0.777778	1.23457	0	0	0	0	0	0	1.23457
Control	GC046	FXBVK	FXBVKD61	Segment8	96	114	19	1.197	0	0	Aspiny	0	0	0	0	0	0	0	0	0	0	0	0	0	0	0	0
Control	GC046	FXBVK	FXBVKD61	Segment10	123	124	2	0.126	0	0	Aspiny	0	0	0	0	0	0	0	0	0	0	0	0	0	0	0	0
Control	GC046	FXBVK	FXBVKD61	Segment12	128	131	4	0.252	0	0	Aspiny	0	0	0	0	0	0	0	0	0	0	0	0	0	0	0	0
Control	GC046	FXBVK	FXBVKD61	Segment14	141	152	12	0.756	0	0	Aspiny	3	2	0	0	0	0	2	1	3.96825	2.6455	0	0	0	0	2.6455	1.32275
Control	GC046	FXBVK	FXBVKD61	Segment16	156	161	6	0.378	0	0	Aspiny	2.8	1	0	0	1	0	0	1.8	7.40741	2.6455	0	0	2.6455	0	0	4.7619
Control	GC046	FXBVK	FXBVKD61	Segment18	166	170	5	0.315	0	0	Aspiny	0	0	0	0	0	0	0	0	0	0	0	0	0	0	0	0
Control	GC046	FXBVK	FXBVKD61	Segment20	176	182	7	0.441	0	0	Aspiny	0.357143	0	0	0	0	0	0	0.357143	0.809848	0	0	0	0	0	0	0.809848
Control	GC046	FXBVK	FXBVKD61	Segment23	202	213	12	0.756	0	0	Aspiny	3	3	0	0	0	0	3	0	3.96825	3.96825	0	0	0	0	3.96825	0
Control	GC046	FXBVK	FXBVKD69	Segment8	73	75	3	0.189	1	2	Spiny	0	0	0	0	0	0	0	0	0	0	0	0	0	0	0	0
Control	GC046	FXBVK	FXBVKD69	Segment10	89	93	5	0.315	1	1	Spiny	0	0	0	0	0	0	0	0	0	0	0	0	0	0	0	0
Control	GC046	FXBVK	FXBVKD69	Segment12	96	102	7	0.441	1	1	Spiny	0	0	0	0	0	0	0	0	0	0	0	0	0	0	0	0
Control	GC046	FXBVK	FXBVKD69	Segment14	113	119	7	0.441	1	1	Spiny	1.28	1	0	0	0	1	0	0.28	2.90249	2.26757	0	0	0	2.26757	0	0.634921
Control	GC046	FXBVK	FXBVKD69	Segment16	124	129	6	0.378	1	1	Spiny	0.24	0	0	0	0	0	0	0.24	0.634921	0	0	0	0	0	0	0.634921
Control	GC046	FXBVK	FXBVKD69	Segment18	139	141	3	0.189	1	1	Spiny	0	0	0	0	0	0	0	0	0	0	0	0	0	0	0	0
Control	GC046	FXBVK	FXBVKD69	Segment20	151	154	4	0.252	1	1	Spiny	0	0	0	0	0	0	0	0	0	0	0	0	0	0	0	0
Control	GC046	FXBVK	FXBVKD69	Segment22	166	168	3	0.189	1	1	Spiny	0.125	0	0	0	0	0	0	0.125	0.661376	0	0	0	0	0	0	0.661376
Control	GC046	FXBVK	FXBVKD69	Segment24	174	177	4	0.252	1	1	Spiny	0.166667	0	0	0	0	0	0	0.166667	0.661376	0	0	0	0	0	0	0.661376
Control	GC046	FXBVK	FXBVKD69	Segment26	194	198	5	0.315	1	1	Spiny	0	0	0	0	0	0	0	0	0	0	0	0	0	0	0	0
Control	GC046	FXBVK	FXBVKD69	Segment2	3	10	8	0.504	3	4	Spiny	0.6	0	0	0	0	0	0	0.6	1.19048	0	0	0	0	0	0	1.19048
Control	GC046	FXBVK	FXBVKD69	Segment4	31	40	10	0.63	3	4	Spiny	1.2963	0	0	0	0	0	0	1.2963	2.05761	0	0	0	0	0	0	2.05761
Control	GC046	FXBVK	FXBVKD69	Segment6	49	52	4	0.252	1	1	Spiny	0.444444	0	0	0	0	0	0	0.444444	1.76367	0	0	0	0	0	0	1.76367
Control	GC046	FXBVK	FXBVKD69	Segment1	1	2	2	0.126	0	0	Aspiny	0.4	0	0	0	0	0	0	0.4	3.1746	0	0	0	0	0	0	3.1746
Control	GC046	FXBVK	FXBVKD69	Segment3	11	30	20	1.26	0	0	Aspiny	1	0	0	0	0	0	0	1	0.793651	0	0	0	0	0	0	0.793651
Control	GC046	FXBVK	FXBVKD69	Segment5	41	48	8	0.504	0	0	Aspiny	3.33333	3	0	0	3	0	0	0.333333	6.61376	5.95238	0	0	5.95238	0	0	0.661376
Control	GC046	FXBVK	FXBVKD69	Segment7	53	72	20	1.26	0	0	Aspiny	4.92593	4	0	1	1	2	0	0.925926	3.90947	3.1746	0	0.793651	0.793651	1.5873	0	0.734862
Control	GC046	FXBVK	FXBVKD69	Segment9	76	88	13	0.819	0	0	Aspiny	1	1	0	0	1	0	0	0	1.221	1.221	0	0	1.221	0	0	0
Control	GC046	FXBVK	FXBVKD69	Segment11	94	95	2	0.126	0	0	Aspiny	0	0	0	0	0	0	0	0	0	0	0	0	0	0	0	0
Control	GC046	FXBVK	FXBVKD69	Segment13	103	112	10	0.63	0	0	Aspiny	0.32	0	0	0	0	0	0	0.32	0.507937	0	0	0	0	0	0	0.507937
Control	GC046	FXBVK	FXBVKD69	Segment15	120	123	4	0.252	0	0	Aspiny	0.16	0	0	0	0	0	0	0.16	0.634921	0	0	0	0	0	0	0.634921
Control	GC046	FXBVK	FXBVKD69	Segment17	130	138	9	0.567	0	0	Aspiny	0	0	0	0	0	0	0	0	0	0	0	0	0	0	0	0
Control	GC046	FXBVK	FXBVKD69	Segment19	142	150	9	0.567	0	0	Aspiny	0	0	0	0	0	0	0	0	0	0	0	0	0	0	0	0
Control	GC046	FXBVK	FXBVKD69	Segment21	155	165	11	0.693	0	0	Aspiny	0.125	0	0	0	0	0	0	0.125	0.180375	0	0	0	0	0	0	0.180375
Control	GC046	FXBVK	FXBVKD69	Segment23	169	173	5	0.315	0	0	Aspiny	1.20833	0	0	0	0	0	0	1.20833	3.83598	0	0	0	0	0	0	3.83598
Control	GC046	FXBVK	FXBVKD69	Segment25	178	193	16	1.008	0	0	Aspiny	1.375	0	0	0	0	0	0	1.375	1.36409	0	0	0	0	0	0	1.36409
LTP	GC046	FZYJV	FZYJVD17	Segment 1	16	17	2	0.092	1	1	Spiny	0.333333	0.333333	0	0	0	0.333333	0	0	3.62319	3.62319	0	0	0	3.62319	0	0
LTP	GC046	FZYJV	FZYJVD17	Segment 3	23	30	8	0.368	3	4	Spiny	4.4	2.4	0	0	2	0.4	0	2	11.9565	6.52174	0	0	5.43478	1.08696	0	5.43478
LTP	GC046	FZYJV	FZYJVD17	Segment 5	37	45	9	0.414	1	1	Spiny	0	0	0	0	0	0	0	0	0	0	0	0	0	0	0	0
LTP	GC046	FZYJV	FZYJVD17	Segment 7	51	55	5	0.23	1	1	Spiny	0	0	0	0	0	0	0	0	0	0	0	0	0	0	0	0
LTP	GC046	FZYJV	FZYJVD17	Segment 9	77	86	10	0.46	2	2	Spiny	0	0	0	0	0	0	0	0	0	0	0	0	0	0	0	0
LTP	GC046	FZYJV	FZYJVD17	Segment 11	95	96	2	0.092	1	1	Spiny	0	0	0	0	0	0	0	0	0	0	0	0	0	0	0	0
LTP	GC046	FZYJV	FZYJVD17	Segment 13	106	114	9	0.414	2	3	Spiny	2	0	0	0	0	0	0	2	4.83092	0	0	0	0	0	0	4.83092
LTP	GC046	FZYJV	FZYJVD17	Segment 15	125	132	8	0.368	2	2	Spiny	0	0	0	0	0	0	0	0	0	0	0	0	0	0	0	0
LTP	GC046	FZYJV	FZYJVD17	Segment 17	144	149	6	0.276	2	2	Spiny	1	0	0	0	0	0	0	1	3.62319	0	0	0	0	0	0	3.62319
LTP	GC046	FZYJV	FZYJVD17	Segment 19	152	154	3	0.138	1	1	Spiny	0	0	0	0	0	0	0	0	0	0	0	0	0	0	0	0
LTP	GC046	FZYJV	FZYJVD17	Segment 21	158	170	13	0.598	2	2	Spiny	0	0	0	0	0	0	0	0	0	0	0	0	0	0	0	0
LTP	GC046	FZYJV	FZYJVD17	Segment 2	18	22	5	0.23	0	0	Aspiny	2.26667	2.26667	0	0	0	2.26667	0	0	9.85507	9.85507	0	0	0	9.85507	0	0
LTP	GC046	FZYJV	FZYJVD17	Segment 4	31	36	6	0.276	0	0	Aspiny	0	0	0	0	0	0	0	0	0	0	0	0	0	0	0	0
LTP	GC046	FZYJV	FZYJVD17	Segment 6	46	50	5	0.23	0	0	Aspiny	0	0	0	0	0	0	0	0	0	0	0	0	0	0	0	0
LTP	GC046	FZYJV	FZYJVD17	Segment 8	56	76	21	0.966	0	0	Aspiny	0	0	0	0	0	0	0	0	0	0	0	0	0	0	0	0
LTP	GC046	FZYJV	FZYJVD17	Segment 10	87	94	8	0.368	0	0	Aspiny	0	0	0	0	0	0	0	0	0	0	0	0	0	0	0	0
LTP	GC046	FZYJV	FZYJVD17	Segment 12	97	105	9	0.414	0	0	Aspiny	0	0	0	0	0	0	0	0	0	0	0	0	0	0	0	0
LTP	GC046	FZYJV	FZYJVD17	Segment 14	115	124	10	0.46	0	0	Aspiny	2	0	0	0	0	0	0	2	4.34783	0	0	0	0	0	0	4.34783
LTP	GC046	FZYJV	FZYJVD17	Segment 16	133	143	11	0.506	0	0	Aspiny	0	0	0	0	0	0	0	0	0	0	0	0	0	0	0	0
LTP	GC046	FZYJV	FZYJVD17	Segment 18	150	151	2	0.092	0	0	Aspiny	0	0	0	0	0	0	0	0	0	0	0	0	0	0	0	0
LTP	GC046	FZYJV	FZYJVD17	Segment 20	155	157	3	0.138	0	0	Aspiny	0	0	0	0	0	0	0	0	0	0	0	0	0	0	0	0
LTP	GC046	FZYJV	FZYJVD17	Segment 22	171	191	21	0.966	0	0	Aspiny	0	0	0	0	0	0	0	0	0	0	0	0	0	0	0	0
LTP	GC046	FZYJV	FZYJVD26	Segment 1	73	84	12	0.552	3	4	Spiny	0.545455	0	0	0	0	0	0	0.545455	0.988142	0	0	0	0	0	0	0.988142
LTP	GC046	FZYJV	FZYJVD26	Segment 3	93	98	6	0.276	2	2	Spiny	0.406699	0	0	0	0	0	0	0.406699	1.47355	0	0	0	0	0	0	1.47355
LTP	GC046	FZYJV	FZYJVD26	Segment 5	102	112	11	0.506	2	2	Spiny	0.421053	0	0	0	0	0	0	0.421053	0.83212	0	0	0	0	0	0	0.83212
LTP	GC046	FZYJV	FZYJVD26	Segment 7	116	126	11	0.506	3	3	Spiny	6.42857	6.42857	0	0	0	0	6.42857	0	12.7047	12.7047	0	0	0	0	12.7047	0
LTP	GC046	FZYJV	FZYJVD26	Segment 9	132	140	9	0.414	1	2	Spiny	1.58333	1	0	0	1	0	0	0.583333	3.82448	2.41546	0	0	2.41546	0	0	1.40902
LTP	GC046	FZYJV	FZYJVD26	Segment 11	149	154	6	0.276	1	2	Spiny	0	0	0	0	0	0	0	0	0	0	0	0	0	0	0	0
LTP	GC046	FZYJV	FZYJVD26	Segment 13	176	181	6	0.276	1	1	Spiny	0	0	0	0	0	0	0	0	0	0	0	0	0	0	0	0
LTP	GC046	FZYJV	FZYJVD26	Segment 15	189	200	12	0.552	2	2	Spiny	0	0	0	0	0	0	0	0	0	0	0	0	0	0	0	0
LTP	GC046	FZYJV	FZYJVD26	Segment 2	85	92	8	0.368	0	0	Aspiny	0.4689	0	0	0	0	0	0	0.4689	1.27418	0	0	0	0	0	0	1.27418
LTP	GC046	FZYJV	FZYJVD26	Segment 4	99	101	3	0.138	0	0	Aspiny	0.157895	0	0	0	0	0	0	0.157895	1.14416	0	0	0	0	0	0	1.14416
LTP	GC046	FZYJV	FZYJVD26	Segment 6	113	115	3	0.138	0	0	Aspiny	0	0	0	0	0	0	0	0	0	0	0	0	0	0	0	0
LTP	GC046	FZYJV	FZYJVD26	Segment 8	127	131	5	0.23	0	0	Aspiny	0.988095	0.571429	0	0	0	0	0.571429	0.416667	4.29607	2.48447	0	0	0	0	2.48447	1.81159
LTP	GC046	FZYJV	FZYJVD26	Segment 10	141	148	8	0.368	0	0	Aspiny	0	0	0	0	0	0	0	0	0	0	0	0	0	0	0	0
LTP	GC046	FZYJV	FZYJVD26	Segment 12	155	175	21	0.966	0	0	Aspiny	0	0	0	0	0	0	0	0	0	0	0	0	0	0	0	0
LTP	GC046	FZYJV	FZYJVD26	Segment 14	182	184	3	0.138	0	0	Aspiny	0	0	0	0	0	0	0	0	0	0	0	0	0	0	0	0
LTP	GC046	FZYJV	FZYJVD26	Segment 16	201	202	2	0.092	0	0	Aspiny	1	0	0	0	0	0	0	1	10.8696	0	0	0	0	0	0	10.8696
LTP	GC046	FZYJV	FZYJVD28	Segment 2	30	36	7	0.322	4	4	Spiny	3.6	3	0	2	0	1	0	0.6	11.1801	9.31677	0	6.21118	0	3.10559	0	1.86335
LTP	GC046	FZYJV	FZYJVD28	Segment 4	46	52	7	0.322	2	2	Spiny	1	1	0	0	0	1	0	0	3.10559	3.10559	0	0	0	3.10559	0	0
LTP	GC046	FZYJV	FZYJVD28	Segment 6	72	73	2	0.092	1	1	Spiny	0.198413	0	0	0	0	0	0	0.198413	2.15666	0	0	0	0	0	0	2.15666
LTP	GC046	FZYJV	FZYJVD28	Segment 8	80	86	7	0.322	1	1	Spiny	1.19444	1	0	0	1	0	0	0.194444	3.70945	3.10559	0	0	3.10559	0	0	0.603865
LTP	GC046	FZYJV	FZYJVD28	Segment 10	100	112	13	0.598	2	2	Spiny	4.08333	4.08333	0	0	0	4.08333	0	0	6.82832	6.82832	0	0	0	6.82832	0	0
LTP	GC046	FZYJV	FZYJVD28	Segment 12	121	121	1	0.046	1	1	Spiny	1.07143	1	0	0	1	0	0	0.0714286	23.2919	21.7391	0	0	21.7391	0	0	1.5528
LTP	GC046	FZYJV	FZYJVD28	Segment 14	149	151	3	0.138	1	1	Spiny	1	1	0	0	0	0	1	0	7.24638	7.24638	0	0	0	0	7.24638	0
LTP	GC046	FZYJV	FZYJVD28	Segment 1	16	29	14	0.644	0	0	Aspiny	0	0	0	0	0	0	0	0	0	0	0	0	0	0	0	0
LTP	GC046	FZYJV	FZYJVD28	Segment 3	37	45	9	0.414	0	0	Aspiny	0.4	0	0	0	0	0	0	0.4	0.966184	0	0	0	0	0	0	0.966184
LTP	GC046	FZYJV	FZYJVD28	Segment 5	53	71	19	0.874	0	0	Aspiny	0.333333	0	0	0	0	0	0	0.333333	0.381388	0	0	0	0	0	0	0.381388
LTP	GC046	FZYJV	FZYJVD28	Segment 7	74	79	6	0.276	0	0	Aspiny	1.02381	0	0	0	0	0	0	1.02381	3.70945	0	0	0	0	0	0	3.70945
LTP	GC046	FZYJV	FZYJVD28	Segment 9	87	99	13	0.598	0	0	Aspiny	0.5	0.25	0	0	0	0.25	0	0.25	0.83612	0.41806	0	0	0	0.41806	0	0.41806
LTP	GC046	FZYJV	FZYJVD28	Segment 11	113	120	8	0.368	0	0	Aspiny	2.80952	2.66667	0	0	0	2.66667	0	0.142857	7.63458	7.24638	0	0	0	7.24638	0	0.388199
LTP	GC046	FZYJV	FZYJVD28	Segment 13	122	148	27	1.242	0	0	Aspiny	1.78571	1	0	1	0	0	0	0.785714	1.43777	0.805153	0	0.805153	0	0	0	0.63262
LTP	GC046	FZYJV	FZYJVD30	Segment 1	14	26	13	0.598	3	3	Spiny	1	0	0	0	0	0	0	1	1.67224	0	0	0	0	0	0	1.67224
LTP	GC046	FZYJV	FZYJVD30	Segment 2	33	50	18	0.828	3	3	Spiny	0	0	0	0	0	0	0	0	0	0	0	0	0	0	0	0
LTP	GC046	FZYJV	FZYJVD30	Segment 3	56	63	8	0.368	1	2	Spiny	4	4	0	0	0	0	4	0	10.8696	10.8696	0	0	0	0	10.8696	0
LTP	GC046	FZYJV	FZYJVD30	Segment 5	76	77	2	0.092	1	1	Spiny	0	0	0	0	0	0	0	0	0	0	0	0	0	0	0	0
LTP	GC046	FZYJV	FZYJVD30	Segment 7	80	85	6	0.276	1	2	Spiny	0	0	0	0	0	0	0	0	0	0	0	0	0	0	0	0
LTP	GC046	FZYJV	FZYJVD30	Segment 9	88	91	4	0.184	1	1	Spiny	0	0	0	0	0	0	0	0	0	0	0	0	0	0	0	0
LTP	GC046	FZYJV	FZYJVD30	Segment 11	96	112	17	0.782	6	6	Spiny	1.04082	0	0	0	0	0	0	1.04082	1.33097	0	0	0	0	0	0	1.33097
LTP	GC046	FZYJV	FZYJVD30	Segment 13	116	118	3	0.138	1	1	Spiny	0.0612245	0	0	0	0	0	0	0.0612245	0.443656	0	0	0	0	0	0	0.443656
LTP	GC046	FZYJV	FZYJVD30	Segment 15	127	131	5	0.23	1	2	Spiny	1.10204	1	0	0	1	0	0	0.102041	4.79148	4.34783	0	0	4.34783	0	0	0.443656
LTP	GC046	FZYJV	FZYJVD30	Segment 17	136	139	4	0.184	1	1	Spiny	0.0816327	0	0	0	0	0	0	0.0816327	0.443656	0	0	0	0	0	0	0.443656
LTP	GC046	FZYJV	FZYJVD30	Segment 19	155	158	4	0.184	1	2	Spiny	0	0	0	0	0	0	0	0	0	0	0	0	0	0	0	0
LTP	GC046	FZYJV	FZYJVD30	Segment 21	161	182	22	1.012	3	4	Spiny	0	0	0	0	0	0	0	0	0	0	0	0	0	0	0	0
LTP	GC046	FZYJV	FZYJVD30	Segment 23	191	194	4	0.184	1	1	Spiny	0	0	0	0	0	0	0	0	0	0	0	0	0	0	0	0
LTP	GC046	FZYJV	FZYJVD30	Segment 4	64	75	12	0.552	0	0	Aspiny	0	0	0	0	0	0	0	0	0	0	0	0	0	0	0	0
LTP	GC046	FZYJV	FZYJVD30	Segment 6	78	79	2	0.092	0	0	Aspiny	2	2	0	1	1	0	0	0	21.7391	21.7391	0	10.8696	10.8696	0	0	0
LTP	GC046	FZYJV	FZYJVD30	Segment 8	86	87	2	0.092	0	0	Aspiny	0	0	0	0	0	0	0	0	0	0	0	0	0	0	0	0
LTP	GC046	FZYJV	FZYJVD30	Segment 10	92	95	4	0.184	0	0	Aspiny	0	0	0	0	0	0	0	0	0	0	0	0	0	0	0	0
LTP	GC046	FZYJV	FZYJVD30	Segment 12	113	115	3	0.138	0	0	Aspiny	0.291994	0	0	0	0	0	0	0.291994	2.1159	0	0	0	0	0	0	2.1159
LTP	GC046	FZYJV	FZYJVD30	Segment 14	119	126	8	0.368	0	0	Aspiny	0.163265	0	0	0	0	0	0	0.163265	0.443656	0	0	0	0	0	0	0.443656
LTP	GC046	FZYJV	FZYJVD30	Segment 16	132	135	4	0.184	0	0	Aspiny	0.163265	0	0	0	0	0	0	0.163265	0.887311	0	0	0	0	0	0	0.887311
LTP	GC046	FZYJV	FZYJVD30	Segment 18	140	154	15	0.69	0	0	Aspiny	0.122449	0	0	0	0	0	0	0.122449	0.177462	0	0	0	0	0	0	0.177462
LTP	GC046	FZYJV	FZYJVD30	Segment 20	159	160	2	0.092	0	0	Aspiny	0	0	0	0	0	0	0	0	0	0	0	0	0	0	0	0
LTP	GC046	FZYJV	FZYJVD30	Segment 22	183	190	8	0.368	0	0	Aspiny	0	0	0	0	0	0	0	0	0	0	0	0	0	0	0	0
LTP	GC046	FZYJV	FZYJVD30	Segment 24	195	205	11	0.506	0	0	Aspiny	1	1	0	0	1	0	0	0	1.97628	1.97628	0	0	1.97628	0	0	0
LTP	GC048	DCPBM	DCPBMD13	Segment 1	11	14	4	0.22	1	1	Spiny	1	1	0	1	0	0	0	0	4.54545	4.54545	0	4.54545	0	0	0	0
LTP	GC048	DCPBM	DCPBMD13	Segment 3	21	23	3	0.165	1	1	Spiny	0	0	0	0	0	0	0	0	0	0	0	0	0	0	0	0
LTP	GC048	DCPBM	DCPBMD13	Segment 5	26	32	7	0.385	1	1	Spiny	0	0	0	0	0	0	0	0	0	0	0	0	0	0	0	0
LTP	GC048	DCPBM	DCPBMD13	Segment 7	45	56	12	0.66	3	5	Spiny	4.33333	4	1	0	0	3	0	0.333333	6.56566	6.06061	1.51515	0	0	4.54545	0	0.505051
LTP	GC048	DCPBM	DCPBMD13	Segment 9	73	82	10	0.55	2	2	Spiny	0.4	0	0	0	0	0	0	0.4	0.727273	0	0	0	0	0	0	0.727273
LTP	GC048	DCPBM	DCPBMD13	Segment 11	87	95	9	0.495	2	2	Spiny	0	0	0	0	0	0	0	0	0	0	0	0	0	0	0	0
LTP	GC048	DCPBM	DCPBMD13	Segment 13	103	105	3	0.165	1	1	Spiny	1	1	0	1	0	0	0	0	6.06061	6.06061	0	6.06061	0	0	0	0
LTP	GC048	DCPBM	DCPBMD13	Segment 15	111	125	15	0.825	2	2	Spiny	12.1667	12.1667	0	0	0	6	6.16667	0	14.7475	14.7475	0	0	0	7.27273	7.47475	0
LTP	GC048	DCPBM	DCPBMD13	Segment 17	135	140	6	0.33	1	1	Spiny	0	0	0	0	0	0	0	0	0	0	0	0	0	0	0	0
LTP	GC048	DCPBM	DCPBMD13	Segment 19	146	148	3	0.165	1	1	Spiny	0.0769231	0	0	0	0	0	0	0.0769231	0.4662	0	0	0	0	0	0	0.4662
LTP	GC048	DCPBM	DCPBMD13	Segment 21	159	173	15	0.825	2	2	Spiny	0.153846	0	0	0	0	0	0	0.153846	0.18648	0	0	0	0	0	0	0.18648
LTP	GC048	DCPBM	DCPBMD13	Segment 23	190	196	7	0.385	1	1	Spiny	0	0	0	0	0	0	0	0	0	0	0	0	0	0	0	0
LTP	GC048	DCPBM	DCPBMD13	Segment 2	15	20	6	0.33	0	0	Aspiny	0	0	0	0	0	0	0	0	0	0	0	0	0	0	0	0
LTP	GC048	DCPBM	DCPBMD13	Segment 4	24	25	2	0.11	0	0	Aspiny	0	0	0	0	0	0	0	0	0	0	0	0	0	0	0	0
LTP	GC048	DCPBM	DCPBMD13	Segment 6	33	44	12	0.66	0	0	Aspiny	0	0	0	0	0	0	0	0	0	0	0	0	0	0	0	0
LTP	GC048	DCPBM	DCPBMD13	Segment 8	57	72	16	0.88	0	0	Aspiny	3.26667	2	0	0	0	2	0	1.26667	3.71212	2.27273	0	0	0	2.27273	0	1.43939
LTP	GC048	DCPBM	DCPBMD13	Segment 10	83	86	4	0.22	0	0	Aspiny	0	0	0	0	0	0	0	0	0	0	0	0	0	0	0	0
LTP	GC048	DCPBM	DCPBMD13	Segment 12	96	102	7	0.385	0	0	Aspiny	0	0	0	0	0	0	0	0	0	0	0	0	0	0	0	0
LTP	GC048	DCPBM	DCPBMD13	Segment 14	106	110	5	0.275	0	0	Aspiny	1.83333	1.83333	0	0	1	0	0.833333	0	6.66667	6.66667	0	0	3.63636	0	3.0303	0
LTP	GC048	DCPBM	DCPBMD13	Segment 16	126	134	9	0.495	0	0	Aspiny	0	0	0	0	0	0	0	0	0	0	0	0	0	0	0	0
LTP	GC048	DCPBM	DCPBMD13	Segment 18	141	145	5	0.275	0	0	Aspiny	0	0	0	0	0	0	0	0	0	0	0	0	0	0	0	0
LTP	GC048	DCPBM	DCPBMD13	Segment 20	149	158	10	0.55	0	0	Aspiny	0.769231	0	0	0	0	0	0	0.769231	1.3986	0	0	0	0	0	0	1.3986
LTP	GC048	DCPBM	DCPBMD13	Segment 22	174	189	16	0.88	0	0	Aspiny	0	0	0	0	0	0	0	0	0	0	0	0	0	0	0	0
LTP	GC048	DCPBM	DCPBMD13	Segment 24	197	200	4	0.22	0	0	Aspiny	0	0	0	0	0	0	0	0	0	0	0	0	0	0	0	0
LTP	GC048	DCPBM	DCPBMD25	Segment 2	17	21	5	0.275	1	1	Spiny	0.5	0	0	0	0	0	0	0.5	1.81818	0	0	0	0	0	0	1.81818
LTP	GC048	DCPBM	DCPBMD25	Segment 4	31	34	4	0.22	2	2	Spiny	0	0	0	0	0	0	0	0	0	0	0	0	0	0	0	0
LTP	GC048	DCPBM	DCPBMD25	Segment 6	42	59	18	0.99	3	3	Spiny	0.290323	0	0	0	0	0	0	0.290323	0.293255	0	0	0	0	0	0	0.293255
LTP	GC048	DCPBM	DCPBMD25	Segment 8	76	86	11	0.605	2	2	Spiny	0.193548	0	0	0	0	0	0	0.193548	0.319915	0	0	0	0	0	0	0.319915
LTP	GC048	DCPBM	DCPBMD25	Segment 10	91	117	27	1.485	6	7	Spiny	2	2	0	0	0	2	0	0	1.3468	1.3468	0	0	0	1.3468	0	0
LTP	GC048	DCPBM	DCPBMD25	Segment 12	121	121	1	0.055	1	1	Spiny	0	0	0	0	0	0	0	0	0	0	0	0	0	0	0	0
LTP	GC048	DCPBM	DCPBMD25	Segment 14	133	136	4	0.22	1	1	Spiny	0	0	0	0	0	0	0	0	0	0	0	0	0	0	0	0
LTP	GC048	DCPBM	DCPBMD25	Segment 16	144	176	33	1.815	5	6	Spiny	1	0	0	0	0	0	0	1	0.550964	0	0	0	0	0	0	0.550964
LTP	GC048	DCPBM	DCPBMD25	Segment 18	190	193	4	0.22	1	1	Spiny	0	0	0	0	0	0	0	0	0	0	0	0	0	0	0	0
LTP	GC048	DCPBM	DCPBMD25	Segment 20	197	203	7	0.385	1	1	Spiny	0	0	0	0	0	0	0	0	0	0	0	0	0	0	0	0
LTP	GC048	DCPBM	DCPBMD25	Segment 1	16	16	1	0.055	0	0	Aspiny	0.5	0	0	0	0	0	0	0.5	9.09091	0	0	0	0	0	0	9.09091
LTP	GC048	DCPBM	DCPBMD25	Segment 3	22	30	9	0.495	0	0	Aspiny	1	0	0	0	0	0	0	1	2.0202	0	0	0	0	0	0	2.0202
LTP	GC048	DCPBM	DCPBMD25	Segment 5	35	41	7	0.385	0	0	Aspiny	0	0	0	0	0	0	0	0	0	0	0	0	0	0	0	0
LTP	GC048	DCPBM	DCPBMD25	Segment 7	60	75	16	0.88	0	0	Aspiny	0.516129	0	0	0	0	0	0	0.516129	0.58651	0	0	0	0	0	0	0.58651
LTP	GC048	DCPBM	DCPBMD25	Segment 9	87	90	4	0.22	0	0	Aspiny	0	0	0	0	0	0	0	0	0	0	0	0	0	0	0	0
LTP	GC048	DCPBM	DCPBMD25	Segment 11	118	120	3	0.165	0	0	Aspiny	0	0	0	0	0	0	0	0	0	0	0	0	0	0	0	0
LTP	GC048	DCPBM	DCPBMD25	Segment 13	122	132	11	0.605	0	0	Aspiny	1	1	0	0	1	0	0	0	1.65289	1.65289	0	0	1.65289	0	0	0
LTP	GC048	DCPBM	DCPBMD25	Segment 15	137	143	7	0.385	0	0	Aspiny	0	0	0	0	0	0	0	0	0	0	0	0	0	0	0	0
LTP	GC048	DCPBM	DCPBMD25	Segment 17	177	189	13	0.715	0	0	Aspiny	1	1	0	1	0	0	0	0	1.3986	1.3986	0	1.3986	0	0	0	0
LTP	GC048	DCPBM	DCPBMD25	Segment 19	194	196	3	0.165	0	0	Aspiny	0	0	0	0	0	0	0	0	0	0	0	0	0	0	0	0
LTP	GC048	DCPBM	DCPBMD32	Segment 1	6	10	5	0.275	1	1	Spiny	0	0	0	0	0	0	0	0	0	0	0	0	0	0	0	0
LTP	GC048	DCPBM	DCPBMD32	Segment 4	27	35	9	0.495	4	5	Spiny	2.4	2	0	0	1	1	0	0.4	4.84848	4.0404	0	0	2.0202	2.0202	0	0.808081
LTP	GC048	DCPBM	DCPBMD32	Segment 6	54	60	7	0.385	1	3	Spiny	0.75	0.75	0	0	0	0	0.75	0	1.94805	1.94805	0	0	0	0	1.94805	0
LTP	GC048	DCPBM	DCPBMD32	Segment 8	64	75	12	0.66	4	5	Spiny	2.73333	2.73333	0	0	1	1	0.733333	0	4.14141	4.14141	0	0	1.51515	1.51515	1.11111	0
LTP	GC048	DCPBM	DCPBMD32	Segment 10	90	92	3	0.165	1	1	Spiny	0.133333	0	0	0	0	0	0	0.133333	0.808081	0	0	0	0	0	0	0.808081
LTP	GC048	DCPBM	DCPBMD32	Segment 12	99	108	10	0.55	3	4	Spiny	1	1	0	0	1	0	0	0	1.81818	1.81818	0	0	1.81818	0	0	0
LTP	GC048	DCPBM	DCPBMD32	Segment 14	116	121	6	0.33	2	2	Spiny	1.00833	0.333333	0	0	0	0.333333	0	0.675	3.05556	1.0101	0	0	0	1.0101	0	2.04545
LTP	GC048	DCPBM	DCPBMD32	Segment 16	128	137	10	0.55	2	3	Spiny	0.1	0	0	0	0	0	0	0.1	0.181818	0	0	0	0	0	0	0.181818
LTP	GC048	DCPBM	DCPBMD32	Segment 18	144	155	12	0.66	3	3	Spiny	1	0	0	0	0	0	0	1	1.51515	0	0	0	0	0	0	1.51515
LTP	GC048	DCPBM	DCPBMD32	Segment 20	161	162	2	0.11	1	1	Spiny	1	1	0	0	1	0	0	0	9.09091	9.09091	0	0	9.09091	0	0	0
LTP	GC048	DCPBM	DCPBMD32	Segment 2	11	14	4	0.22	0	0	Aspiny	0	0	0	0	0	0	0	0	0	0	0	0	0	0	0	0
LTP	GC048	DCPBM	DCPBMD32	Segment 3	22	26	5	0.275	0	0	Aspiny	0.6	0	0	0	0	0	0	0.6	2.18182	0	0	0	0	0	0	2.18182
LTP	GC048	DCPBM	DCPBMD32	Segment 5	36	53	18	0.99	0	0	Aspiny	1	1	0	0	1	0	0	0	1.0101	1.0101	0	0	1.0101	0	0	0
LTP	GC048	DCPBM	DCPBMD32	Segment 7	61	63	3	0.165	0	0	Aspiny	2.85	2.85	1	0	0	0	1.85	0	17.2727	17.2727	6.06061	0	0	0	11.2121	0
LTP	GC048	DCPBM	DCPBMD32	Segment 9	76	89	14	0.77	0	0	Aspiny	1.86667	1	0	0	0	1	0	0.866667	2.42424	1.2987	0	0	0	1.2987	0	1.12554
LTP	GC048	DCPBM	DCPBMD32	Segment 11	93	98	6	0.33	0	0	Aspiny	0	0	0	0	0	0	0	0	0	0	0	0	0	0	0	0
LTP	GC048	DCPBM	DCPBMD32	Segment 13	109	115	7	0.385	0	0	Aspiny	1.29167	0.666667	0	0	0	0.666667	0	0.625	3.35498	1.7316	0	0	0	1.7316	0	1.62338
LTP	GC048	DCPBM	DCPBMD32	Segment 15	122	127	6	0.33	0	0	Aspiny	0.6	0	0	0	0	0	0	0.6	1.81818	0	0	0	0	0	0	1.81818
LTP	GC048	DCPBM	DCPBMD32	Segment 17	138	143	6	0.33	0	0	Aspiny	1	1	0	0	1	0	0	0	3.0303	3.0303	0	0	3.0303	0	0	0
LTP	GC048	DCPBM	DCPBMD32	Segment 19	156	160	5	0.275	0	0	Aspiny	0	0	0	0	0	0	0	0	0	0	0	0	0	0	0	0
LTP	GC048	DCPBM	DCPBMD35	Segment 2	12	32	21	1.155	3	5	Spiny	2	2	1	0	1	0	0	0	1.7316	1.7316	0.865801	0	0.865801	0	0	0
LTP	GC048	DCPBM	DCPBMD35	Segment 4	53	68	16	0.88	3	6	Spiny	2.71429	0.714286	0	0	0	0.714286	0	2	3.08442	0.811688	0	0	0	0.811688	0	2.27273
LTP	GC048	DCPBM	DCPBMD35	Segment 6	73	76	4	0.22	1	1	Spiny	0.333333	0.333333	0	0	0	0.333333	0	0	1.51515	1.51515	0	0	0	1.51515	0	0
LTP	GC048	DCPBM	DCPBMD35	Segment 8	79	104	26	1.43	5	5	Spiny	1	1	0	0	1	0	0	0	0.699301	0.699301	0	0	0.699301	0	0	0
LTP	GC048	DCPBM	DCPBMD35	Segment 10	113	127	15	0.825	4	4	Spiny	1	0	0	0	0	0	0	1	1.21212	0	0	0	0	0	0	1.21212
LTP	GC048	DCPBM	DCPBMD35	Segment 12	130	142	13	0.715	2	2	Spiny	2.66667	2.66667	0	0	2	0.666667	0	0	3.7296	3.7296	0	0	2.7972	0.932401	0	0
LTP	GC048	DCPBM	DCPBMD35	Segment 14	145	169	25	1.375	3	4	Spiny	1	0	0	0	0	0	0	1	0.727273	0	0	0	0	0	0	0.727273
LTP	GC048	DCPBM	DCPBMD35	Segment 16	184	189	6	0.33	1	1	Spiny	0	0	0	0	0	0	0	0	0	0	0	0	0	0	0	0
LTP	GC048	DCPBM	DCPBMD35	Segment 18	192	202	11	0.605	2	2	Spiny	0	0	0	0	0	0	0	0	0	0	0	0	0	0	0	0
LTP	GC048	DCPBM	DCPBMD35	Segment 1	5	11	7	0.385	0	0	Aspiny	0	0	0	0	0	0	0	0	0	0	0	0	0	0	0	0
LTP	GC048	DCPBM	DCPBMD35	Segment 3	33	52	20	1.1	0	0	Aspiny	0	0	0	0	0	0	0	0	0	0	0	0	0	0	0	0
LTP	GC048	DCPBM	DCPBMD35	Segment 5	69	72	4	0.22	0	0	Aspiny	1.95238	1.95238	0	0	1	0.952381	0	0	8.87446	8.87446	0	0	4.54545	4.329	0	0
LTP	GC048	DCPBM	DCPBMD35	Segment 7	77	78	2	0.11	0	0	Aspiny	0	0	0	0	0	0	0	0	0	0	0	0	0	0	0	0
LTP	GC048	DCPBM	DCPBMD35	Segment 9	105	112	8	0.44	0	0	Aspiny	0	0	0	0	0	0	0	0	0	0	0	0	0	0	0	0
LTP	GC048	DCPBM	DCPBMD35	Segment 11	128	129	2	0.11	0	0	Aspiny	0	0	0	0	0	0	0	0	0	0	0	0	0	0	0	0
LTP	GC048	DCPBM	DCPBMD35	Segment 13	143	144	2	0.11	0	0	Aspiny	0.333333	0.333333	0	0	0	0.333333	0	0	3.0303	3.0303	0	0	0	3.0303	0	0
LTP	GC048	DCPBM	DCPBMD35	Segment 15	170	183	14	0.77	0	0	Aspiny	0	0	0	0	0	0	0	0	0	0	0	0	0	0	0	0
LTP	GC048	DCPBM	DCPBMD35	Segment 17	190	191	2	0.11	0	0	Aspiny	0	0	0	0	0	0	0	0	0	0	0	0	0	0	0	0

## Sheet: Fig5C
Condition	Experiment	Series	Dendrite	DenLeng	Spines	Sp + endo / um	Sp PSD <0.05 / uM	Sp + endo PSD <0.05 / uM	Total spines total confA >=0.05	Sp PSD >=0.05 / uM	Sp+endo/um total confA >=0.05
Control	GC046	FXBVK	D20	11.8957	15	0.67251	0.504383	0.168128	9	0.756574	0.588446
Control	GC046	FXBVK	D23	11.1062	11	0.36016	0.36016	0.0900401	7	0.63028	0.27012
Control	GC046	FXBVK	D61	12.2045	12	0.327747	0.49162	0.163873	6	0.49162	0.163873
Control	GC046	FXBVK	D69	13.2361	16	0.377754	0.755508	0.226653	6	0.453305	0.151102
Control	GC048	PWCNZ	D07	11.6133	5	0.258325	0.258325	0.0861085	2	0.172217	0.172217
Control	GC048	PWCNZ	D11	12.1699	10	0.16434	0.493019	0	4	0.328679	0.16434
Control	GC048	PWCNZ	D25	12.1768	10	0.410617	0.0821235	0.0821235	9	0.739111	0.328494
Control	GC048	PWCNZ	D26	11.7346	8	0.596525	0.255653	0.170436	5	0.426089	0.426089
TBS	GC046	FZYJV	D17	9.53025	16	0.629574	1.36408	0.419716	3	0.314787	0.209858
TBS	GC046	FZYJV	D26	6.474	17	0.926784	1.54464	0.463392	7	1.08125	0.463392
TBS	GC046	FZYJV	D28	7.0532	9	0.850677	0.992457	0.567118	2	0.283559	0.283559
TBS	GC046	FZYJV	D30	9.7392	28	0.616067	1.8482	0.205356	10	1.02678	0.410711
TBS	GC048	DCPBM	D13	11.6492	17	0.686742	1.03011	0.343371	5	0.429214	0.343371
TBS	GC048	DCPBM	D25	11.3152	21	0.707011	1.67915	0.530259	4	0.353506	0.176753
TBS	GC048	DCPBM	D32	9.25784	25	1.2962	1.9443	0.864132	7	0.756116	0.432066
TBS	GC048	DCPBM	D35	12.0233	31	0.914888	1.49709	0.415858	13	1.08123	0.49903

## Sheet: Fig5D
Condition	Experiment	Series	Dendrite	DenLeng	% Sp + Endos
Control	GC046	FXBVK	D20	11.8957	53.3333
Control	GC046	FXBVK	D23	11.1062	36.3636
Control	GC046	FXBVK	D61	12.2045	33.3333
Control	GC046	FXBVK	D69	13.2361	26.6667
Control	GC048	PWCNZ	D07	11.6133	60
Control	GC048	PWCNZ	D11	12.1699	20
Control	GC048	PWCNZ	D25	12.1768	55.5556
Control	GC048	PWCNZ	D26	11.7346	87.5
TBS	GC046	FZYJV	D17	9.53025	35.7143
TBS	GC046	FZYJV	D26	6.474	28.5714
TBS	GC046	FZYJV	D28	7.0532	55.5556
TBS	GC046	FZYJV	D30	9.7392	26.087
TBS	GC048	DCPBM	D13	11.6492	40
TBS	GC048	DCPBM	D25	11.3152	38.0952
TBS	GC048	DCPBM	D32	9.25784	57.8947
TBS	GC048	DCPBM	D35	12.0233	32

## Sheet: Fig5E
Condition	Experiment	Series	Dendrite	DenLeng	PSD <0.05 All Endos	PSD <0.05 All Endos / um	SP w AV total confA<0.05	SP w AV/um total confA<0.05	SP w CP,CV,LV total confA<0.05	SP w CP,CV,LV/um total confA<0.05	SP w RC total confA<0.05	SP w RC/um total confA<0.05	SP w SC total confA<0.05	SP w SC/um total confA<0.05	SP w SV total confA<0.05	SP w SV/um total confA<0.05	SP w deg total confA<0.05	SP w deg/um total confA<0.05
Control	GC046	FXBVK	D20	11.8957	2	0.168128	0	0	1	0.0840638	0	0	0	0	0	0	0	0
Control	GC046	FXBVK	D23	11.1062	1	0.0900401	0	0	0	0	0	0	0	0	1	0.0900401	0	0
Control	GC046	FXBVK	D61	12.2045	2	0.163873	0	0	0	0	0	0	0	0	1	0.0819367	1	0.0819367
Control	GC046	FXBVK	D69	13.2361	3	0.226653	0	0	0	0	1	0.0755508	0	0	3	0.226653	0	0
Control	GC048	PWCNZ	D07	11.6133	1	0.0861085	0	0	1	0.0861085	0	0	0	0	0	0	0	0
Control	GC048	PWCNZ	D11	12.1699	0	0	0	0	0	0	0	0	0	0	0	0	0	0
Control	GC048	PWCNZ	D25	12.1768	1	0.0821235	0	0	1	0.0821235	0	0	0	0	0	0	0	0
Control	GC048	PWCNZ	D26	11.7346	2	0.170436	0	0	0	0	0	0	0	0	2	0.170436	0	0
TBS	GC046	FZYJV	D17	9.53025	4	0.419716	0	0	0	0	0	0	0	0	4	0.419716	0	0
TBS	GC046	FZYJV	D26	6.474	3	0.463392	1	0.154464	1	0.154464	0	0	0	0	2	0.308928	0	0
TBS	GC046	FZYJV	D28	7.0532	4	0.567118	0	0	1	0.14178	1	0.14178	0	0	3	0.425339	0	0
TBS	GC046	FZYJV	D30	9.7392	2	0.205356	0	0	0	0	0	0	1	0.102678	1	0.102678	0	0
TBS	GC048	DCPBM	D13	11.6492	4	0.343371	0	0	0	0	2	0.171686	0	0	1	0.0858428	1	0.0858428
TBS	GC048	DCPBM	D25	11.3152	6	0.530259	0	0	2	0.176753	1	0.0883764	0	0	3	0.265129	0	0
TBS	GC048	DCPBM	D32	9.25784	8	0.864132	0	0	2	0.216033	1	0.108017	0	0	7	0.756116	0	0
TBS	GC048	DCPBM	D35	12.0233	5	0.415858	0	0	3	0.249515	2	0.166343	0	0	0	0	1	0.0831716

## Sheet: Summary Statistics
Fig 5B	All Shaft Endos / um						Fig 5B	All Constructive Shaft Endos / um						Fig 5B	Shaft AVs / um						Fig 5B	Shaft CP/CV/LV / um						Fig 5B	Shaft RC / um						Fig 5B	Shaft SC / um						Fig 5B	Shaft SVs / um						Fig 5B
	SS	Degr. Of Freedom	MS	F	p			SS	Degr. Of Freedom	MS	F	p			SS	Degr. Of Freedom	MS	F	p			SS	Degr. Of Freedom	MS	F	p			SS	Degr. Of Freedom	MS	F	p			SS	Degr. Of Freedom	MS	F	p			SS	Degr. Of Freedom	MS	F	p
Intercept	1277.7	1	1277.7	108.769	0		Intercept	663.764	1	663.764	67.0956	8.10463e-15		Intercept	0.194713	1	0.194713	1.50919	0.220249		Intercept	63.9288	1	63.9288	20.1649	1.02289e-05		Intercept	27.6203	1	27.6203	23.4825	2.04674e-06		Intercept	59.2257	1	59.2257	20.1647	1.023e-05		Intercept	19.1449	1	19.1449	14.2759	0.00019123		Intercept
(1)Experiment	13.8855	1	13.8855	1.18205	0.277832		(1)Experiment	3.82791	1	3.82791	0.386938	0.534397		(1)Experiment	0.194713	1	0.194713	1.50919	0.220249		(1)Experiment	2.73937	1	2.73937	0.864071	0.353367		(1)Experiment	0.0461887	1	0.0461887	0.0392692	0.843054		(1)Experiment	0.246978	1	0.246978	0.0840888	0.772036		(1)Experiment	1.05004	1	1.05004	0.782995	0.376952		(1)Experiment
Dendrite(Experiment*Condition)	184.685	12	15.3904	1.31016	0.211546		Dendrite(Experiment*Condition)	187.189	12	15.5991	1.57681	0.0974415		Dendrite(Experiment*Condition)	1.10482	12	0.0920685	0.713608	0.738019		Dendrite(Experiment*Condition)	37.6269	12	3.13558	0.989046	0.459299		Dendrite(Experiment*Condition)	29.1293	12	2.42744	2.06378	0.0192505		Dendrite(Experiment*Condition)	38.0895	12	3.17412	1.0807	0.37602		Dendrite(Experiment*Condition)	17.0911	12	1.42426	1.06204	0.392242		Dendrite(Experiment*Condition)
Condition(Experiment)	24.7241	1	24.7241	2.10472	0.147914		Condition(Experiment)	12.0818	1	12.0818	1.22127	0.270019		Condition(Experiment)	0.194713	1	0.194713	1.50919	0.220249		Condition(Experiment)	0.95548	1	0.95548	0.301384	0.583434		Condition(Experiment)	0.788641	1	0.788641	0.670494	0.413545		Condition(Experiment)	4.555	1	4.555	1.55085	0.214006		Condition(Experiment)	0.00682894	1	0.00682894	0.0050922	0.94316		Condition(Experiment)
(3)Condition	10.9369	1	10.9369	0.931037	0.335389		(3)Condition	6.15003	1	6.15003	0.621667	0.431066		(3)Condition	0.194713	1	0.194713	1.50919	0.220249		(3)Condition	2.82639	1	2.82639	0.891519	0.345844		(3)Condition	7.63599	1	7.63599	6.49204	0.0113464		(3)Condition	1.33009	1	1.33009	0.452856	0.501512		(3)Condition	1.56891	1	1.56891	1.1699	0.280311		(3)Condition
Error	3441.86	293	11.747				Error	2898.6	293	9.89282				Error	37.8024	293	0.129018				Error	928.9	293	3.17031				Error	344.629	293	1.17621				Error	860.572	293	2.93711				Error	392.931	293	1.34106				Error
NOTE: "DECODE"=CON vs LTP							NOTE: "DECODE"=CON vs LTP							NOTE: "DECODE"=CON vs LTP							NOTE: "DECODE"=CON vs LTP							NOTE: "DECODE"=CON vs LTP							NOTE: "DECODE"=CON vs LTP							NOTE: "DECODE"=CON vs LTP							NOTE: "DECODE"=CON vs LTP
SS Condition / (SS Condition + SS Error) = effect size							SS Condition / (SS Condition + SS Error) = effect size							SS Condition / (SS Condition + SS Error) = effect size							SS Condition / (SS Condition + SS Error) = effect size							SS Condition / (SS Condition + SS Error) = effect size							SS Condition / (SS Condition + SS Error) = effect size							SS Condition / (SS Condition + SS Error) = effect size							SS Condition / (SS Condition + SS Error) = effect size
Effect size:							Effect size:							Effect size:							Effect size:							Effect size:							Effect size:							Effect size:							Effect size:
Eta squared	0.00316754						Eta squared	0.00211724						Eta squared	0.00512442						Eta squared	0.0030335						Eta squared	0.0216768						Eta squared	0.0015432						Eta squared	0.00397696						Eta squared
DECODE	Mean	Std Err	minus95%	plus95%	N		DECODE	Mean	Std Err	minus stderr	plus stderr	N		DECODE	Mean	Std Err	minus stderr	plus stderr	N		DECODE	Mean	Std Err	minus stderr	plus stderr	N		DECODE	Mean	Std Err	minus stderr	plus stderr	N		DECODE	Mean	Std Err	minus stderr	plus stderr	N		DECODE	Mean	Std Err	minus95%	plus95%	N		DECODE
Control	1.85231	0.229538	1.39876	2.30586	151		Control	1.30798	0.199222	0.91434	1.70163	151		Control	0				151		Control	0.379988	0.0953166	0.191651	0.568325	151		Spiny							Control	0.456383	0.131389	0.196771	0.715995	151		Control	0.335444	0.0939928	0.149723	0.521165	151		Control
LTP	2.16632	0.314726	1.54467	2.78796	158		LTP	1.56889	0.2975	0.981276	2.15651	158		LTP	0.0534276	0.039816	-0.0252165	0.132072	158		LTP	0.522598	0.175453	0.176045	0.869151	158		Aspiny							LTP	0.367604	0.143763	0.0836453	0.651563	158		LTP	0.189181	0.0922429	0.00698366	0.371378	158		LTP
Fig5C	Sp + endo / uM - All						Fig5C	Sp + endo PSD <0.05 / uM						Fig5C	Sp + endo PSD >=0.05 / uM
	SS	Degr. Of Freedom	MS	F	p			SS	Degr. Of Freedom	MS	F	p			SS	Degr. Of Freedom	MS	F	p
Intercept	5.9975	1	5.9975	144.663	4.71364e-08		Intercept	1.43794	1	1.43794	68.3099	2.68916e-06		Intercept	1.61507	1	1.61507	71.3105	2.15219e-06
tiss	0.748209	1	0.748209	18.0473	0.00113089		tiss	0.497674	1	0.497674	23.6422	0.000390011		tiss	0.0191864	1	0.0191864	0.847137	0.375496
Experiment	0.00467078	1	0.00467078	0.112662	0.742929		Experiment	0.00220927	1	0.00220927	0.104953	0.751542		Experiment	1.0516e-07	1	1.0516e-07	4.64315e-06	0.998316
tiss*Experiment	0.0495175	1	0.0495175	1.19439	0.2959		tiss*Experiment	0.0408104	1	0.0408104	1.93872	0.189072		tiss*Experiment	0.00172435	1	0.00172435	0.0761353	0.787299
Error	0.4975	12	0.0414583				Error	0.252603	12	0.0210502				Error	0.271782	12	0.0226485
NOTE: "tiss" = CON vs LTP							NOTE: "tiss" = CON vs LTP							NOTE: "tiss" = CON vs LTP
SS Condition / (SS Condition + SS Error) = effect size							SS Condition / (SS Condition + SS Error) = effect size							SS Condition / (SS Condition + SS Error) = effect size
Effect size:							Effect size:							Effect size:
Eta squared	0.600629						Eta squared	0.663321						Eta squared	0.0659398
DECODE	Mean	Std Err	minus std err	plus std err	N		DECODE	Mean	Std Err	minus std err	plus std err	N		DECODE	Mean	Std Err	minus std err	plus std err	N
control	0.395997	0.0591273	0.256183	0.535811	8		control	0.12342	0.0253359	0.0980842	0.148756	8		control	0.283085	0.0557336	0.227352	0.338819	8
TBS	0.828493	0.0797216	0.639981	1.017	8		TBS	0.47615	0.068096	0.408054	0.544246	8		TBS	0.352343	0.042164	0.310179	0.394507	8
Fig5D	% Spines + endo
	SS	Degr. Of Freedom	MS	F	p
Intercept	2.94698	1	2.94698	98.2921	3.93032e-07
tiss	0.0216342	1	0.0216342	0.721577	0.412254
Experiment	0.0569065	1	0.0569065	1.89803	0.193449
tiss*Experiment	0.016446	1	0.016446	0.548533	0.473161
Error	0.359782	12	0.0299819
SS Condition / (SS Condition + SS Error) = effect size
Effect size:
Eta squared	NA
DECODE	Mean	Std Err	minus std err	plus std err	N
control	0.465941	0.0775011	0.28268	0.649202	8
TBS	0.392398	0.0415708	0.294098	0.490697	8
Fig 5E	PSD <0.05 All Endos / um						Fig 5E	PSD <0.05 AVs / um						Fig 5E	PSD <0.05 CP/CV/LV / um						Fig 5E	PSD <0.05 RC / um						Fig 5E	PSD <0.05 SC / um						Fig 5E	PSD <0.05 SVs / um						Fig 5E	PSD <0.05 Deg / um
	SS	Degr. Of Freedom	MS	F	p			SS	Degr. Of Freedom	MS	F	p			SS	Degr. Of Freedom	MS	F	p			SS	Degr. Of Freedom	MS	F	p			SS	Degr. Of Freedom	MS	F	p			SS	Degr. Of Freedom	MS	F	p			SS	Degr. Of Freedom	MS	F	p
Intercept	1.43794	1	1.43794	68.3099	2.68916e-06		Intercept	0.0014912	1	0.0014912	1	0.337049		Intercept	0.0886313	1	0.0886313	14.8885	0.00227455		Intercept	0.0353207	1	0.0353207	17.2441	0.00134036		Intercept	0.000658921	1	0.000658921	1	0.337049		Intercept	0.537587	1	0.537587	14.0402	0.00278604		Intercept	0.00393603	1	0.00393603	3.87778	0.072458
tiss	0.497674	1	0.497674	23.6422	0.000390011		tiss	0.0014912	1	0.0014912	1	0.337049		tiss	0.0294336	1	0.0294336	4.94433	0.0461401		tiss	0.0225488	1	0.0225488	11.0087	0.00613364		tiss	0.000658921	1	0.000658921	1	0.337049		tiss	0.201306	1	0.201306	5.25751	0.0407154		tiss	0.000473908	1	0.000473908	0.466894	0.507398
Experiment	0.00220927	1	0.00220927	0.104953	0.751542		Experiment	0.0014912	1	0.0014912	1	0.337049		Experiment	0.0115684	1	0.0115684	1.94328	0.188589		Experiment	0.00628418	1	0.00628418	3.06803	0.105338		Experiment	0.000658921	1	0.000658921	1	0.337049		Experiment	0.00891924	1	0.00891924	0.232944	0.638034		Experiment	0.000473908	1	0.000473908	0.466894	0.507398
tiss*Experiment	0.0408104	1	0.0408104	1.93872	0.189072		tiss*Experiment	0.0014912	1	0.0014912	1	0.337049		tiss*Experiment	0.00428661	1	0.00428661	0.720077	0.412726		tiss*Experiment	0.0137003	1	0.0137003	6.68869	0.0238219		tiss*Experiment	0.000658921	1	0.000658921	1	0.337049		tiss*Experiment	0.000386323	1	0.000386323	0.0100896	0.921648		tiss*Experiment	0.00393603	1	0.00393603	3.87778	0.072458
Error	0.252603	12	0.0210502				Error	0.0178944	12	0.0014912				Error	0.0714359	12	0.00595299				Error	0.0245793	12	0.00204828				Error	0.00790705	12	0.000658921				Error	0.45947	12	0.0382891				Error	0.0121803	12	0.00101502
NOTE: "tiss" = CON vs LTP							NOTE: "tiss" = CON vs LTP							NOTE: "tiss" = CON vs LTP							NOTE: "tiss" = CON vs LTP							NOTE: "tiss" = CON vs LTP							NOTE: "tiss" = CON vs LTP							NOTE: "tiss" = CON vs LTP
SS Condition / (SS Condition + SS Error) = effect size							SS Condition / (SS Condition + SS Error) = effect size							SS Condition / (SS Condition + SS Error) = effect size							SS Condition / (SS Condition + SS Error) = effect size							SS Condition / (SS Condition + SS Error) = effect size							SS Condition / (SS Condition + SS Error) = effect size							SS Condition / (SS Condition + SS Error) = effect size
Effect size:							Effect size:							Effect size:							Effect size:							Effect size:							Effect size:							Effect size:
Eta squared	0.663321						Eta squared	0.0769231						Eta squared	0.291799						Eta squared	0.478457						Eta squared	0.0769231						Eta squared	0.304651						Eta squared	0.0374507
DECODE	Mean	Std Err	minus std err	plus std err	N		DECODE	Mean	Std Err	minus std err	plus std err	N		DECODE	Mean	Std Err	minus 95%	plus 95%	N		DECODE	Mean	Std Err	minus 95%	plus 95%	N		DECODE	Mean	Std Err	minus 95%	plus 95%	N		DECODE	Mean	Std Err	minus 95%	plus 95%	N		DECODE	Mean	Std Err	minus 95%	plus 95%	N
control	0.12342	0.0253359	0.0980842	0.148756	8		control	0				8		control	0.031537	0.0153931	-0.00486186	0.0679358	8		control	0.00944386	0.00944386	-0.0128873	0.031775	8		control	0				8		control	0.0711331	0.031271	-0.00281113	0.145077	8		control	0.0102421	0.0102421	-0.0139766	0.0344608	8
TBS	0.47615	0.068096	0.408054	0.544246	8		TBS	0.019308	0.019308	3.46945e-18	0.038616	8		TBS	0.117318	0.0363568	0.0313478	0.203288	8		TBS	0.0845252	0.0265819	0.021669	0.147381	8		TBS	0.0128347	0.0128347	-0.0175146	0.043184	8		TBS	0.295469	0.0859832	0.0921507	0.498786	8		TBS	0.0211268	0.013833	-0.0115831	0.0538367	8
[truncated: 5 more columns]
