# Supplementary figures and images for: Structural plasticity of dendritic secretory compartments during LTP-induced synaptogenesis
Source: eLife journal article supplement (doi:10.7554/elife.46356), 2019-08-21

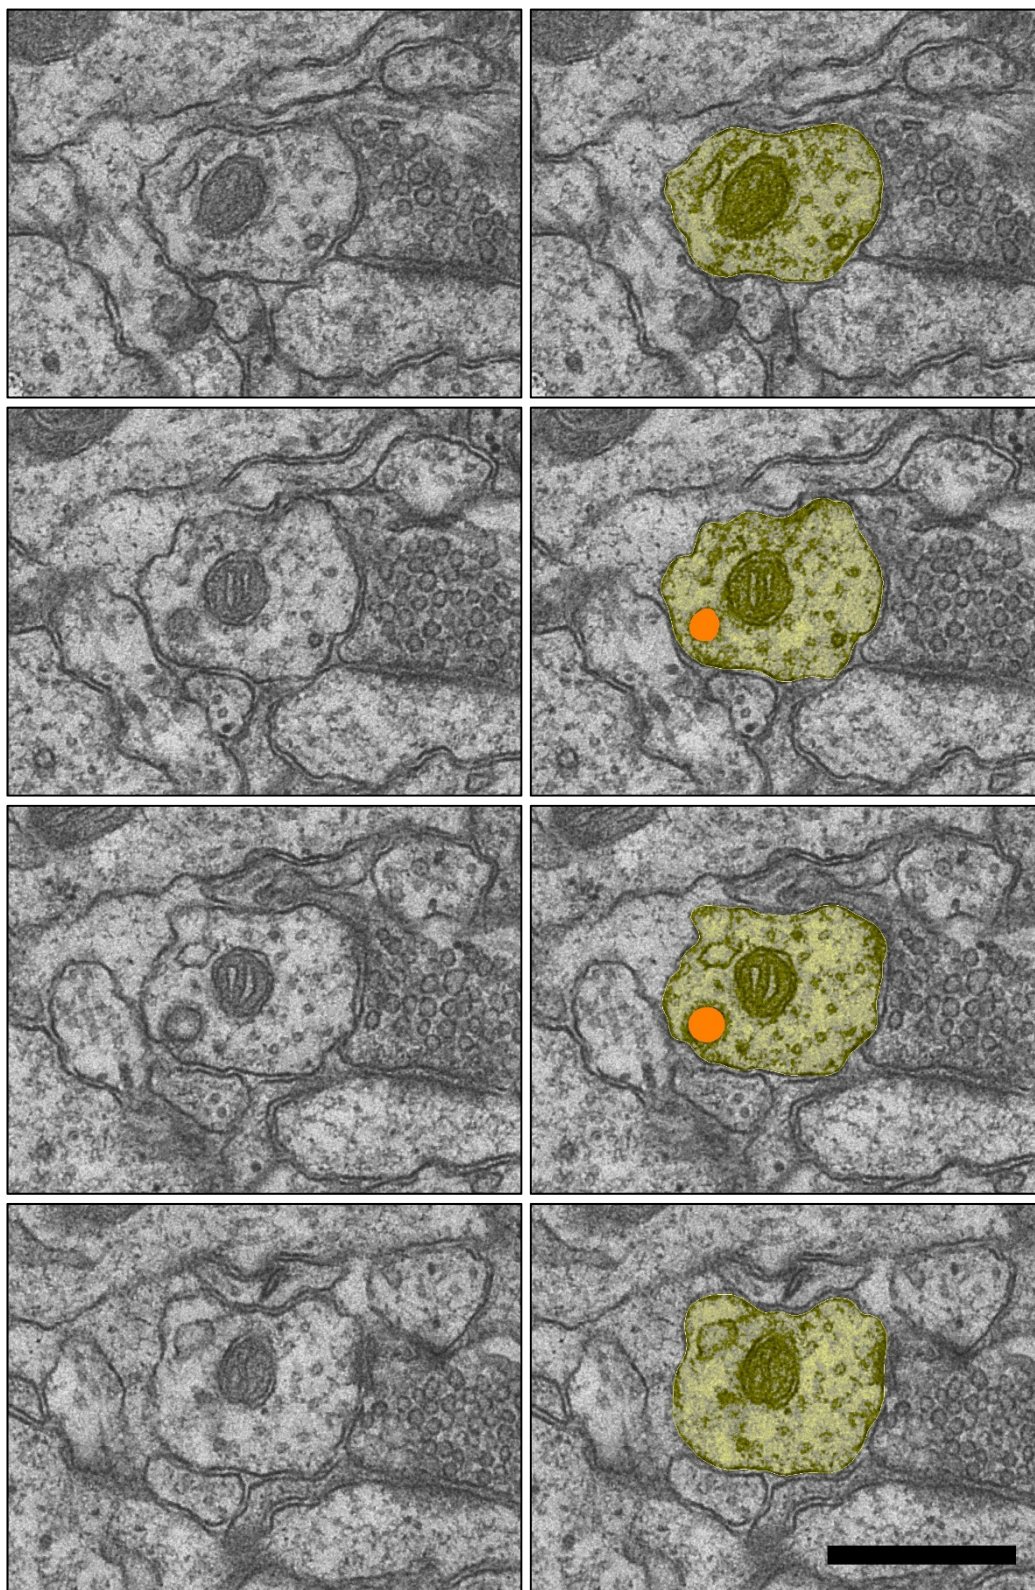

Figure 4 – figure supplement 2

Supplement: supp [file elife-46356-supp-v1.zip]

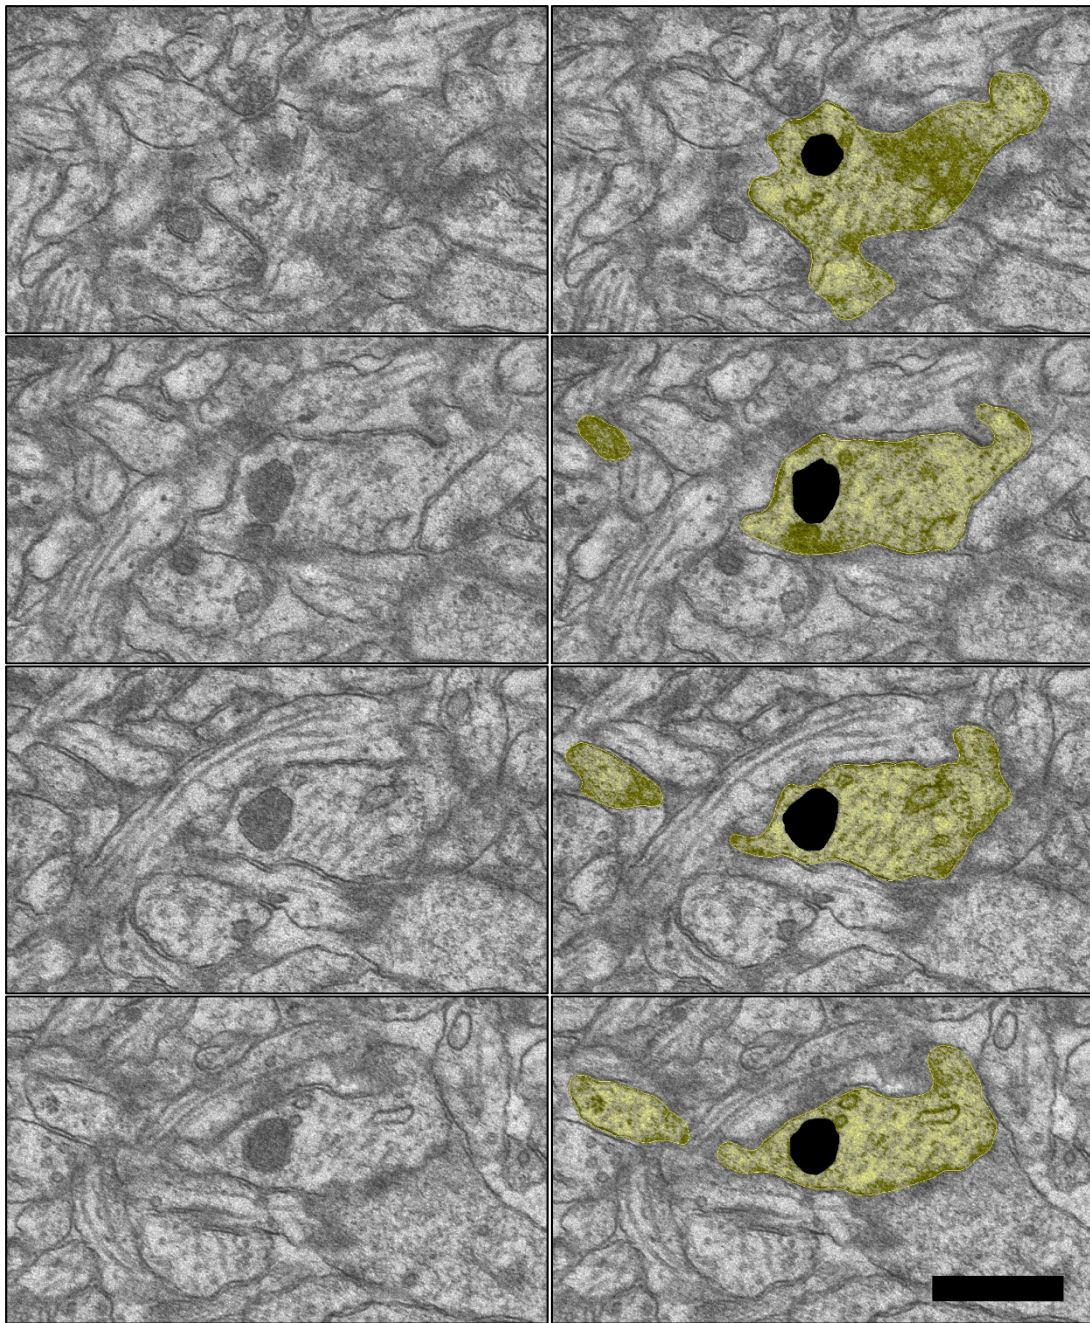

Figure 4 – figure supplement 5

Supplement: supp [file elife-46356-supp-v1.zip]

CON

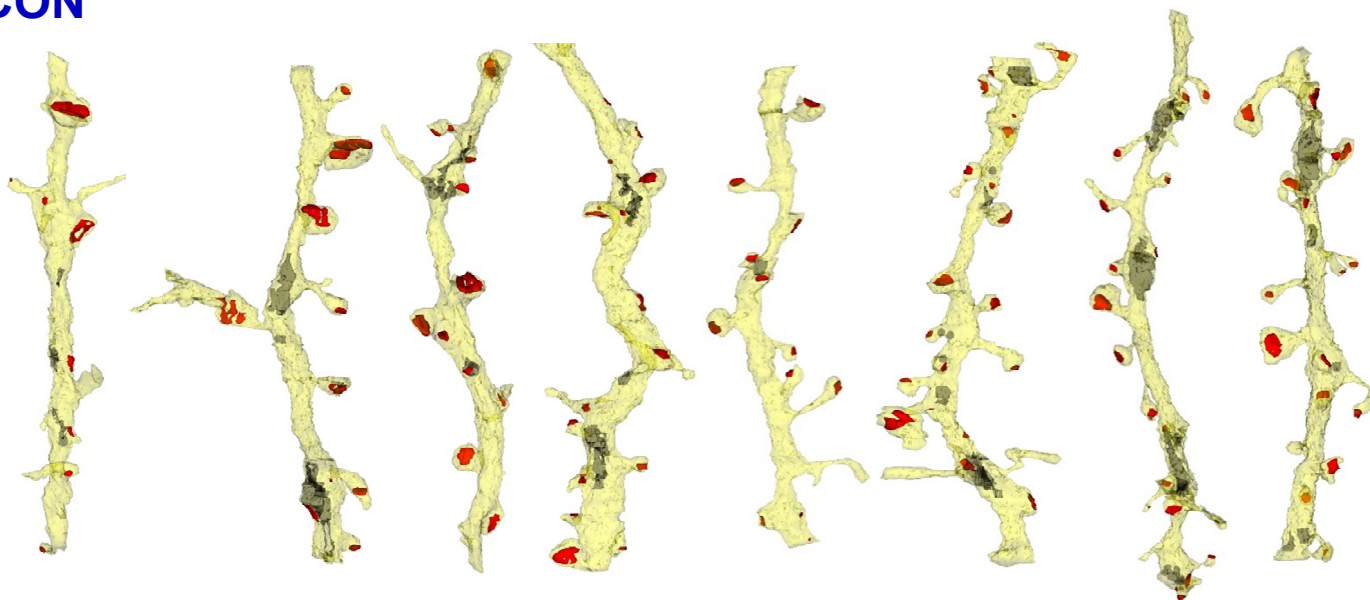

LTP

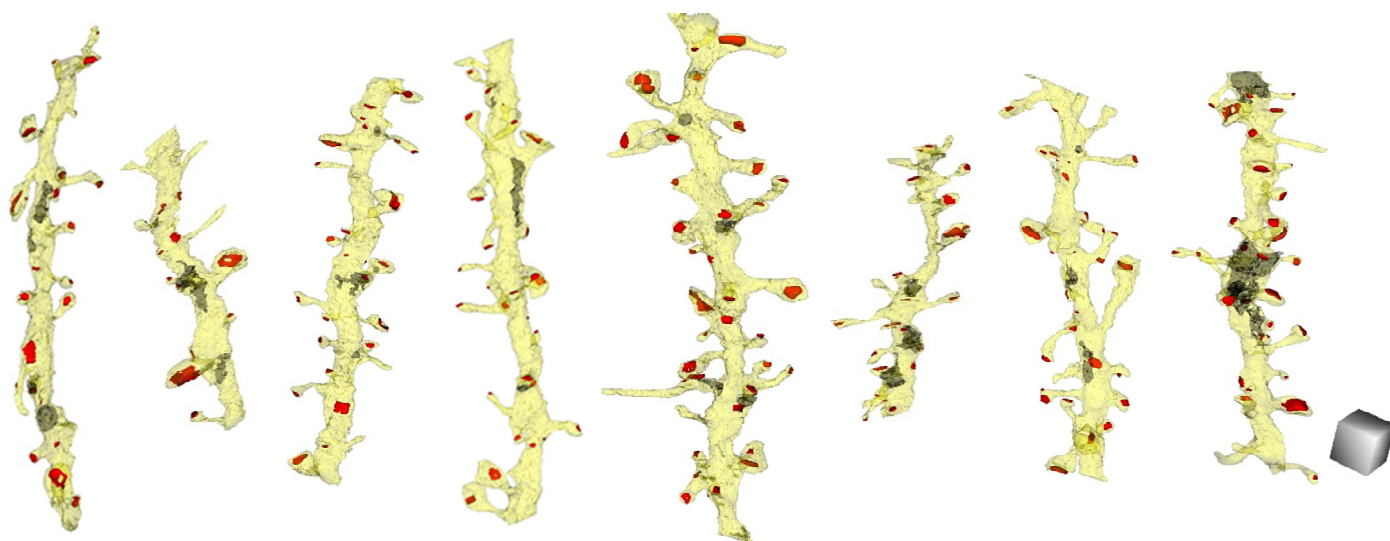

Figure 5 – figure supplement 2

Supplement: supp [file elife-46356-supp-v1.zip]

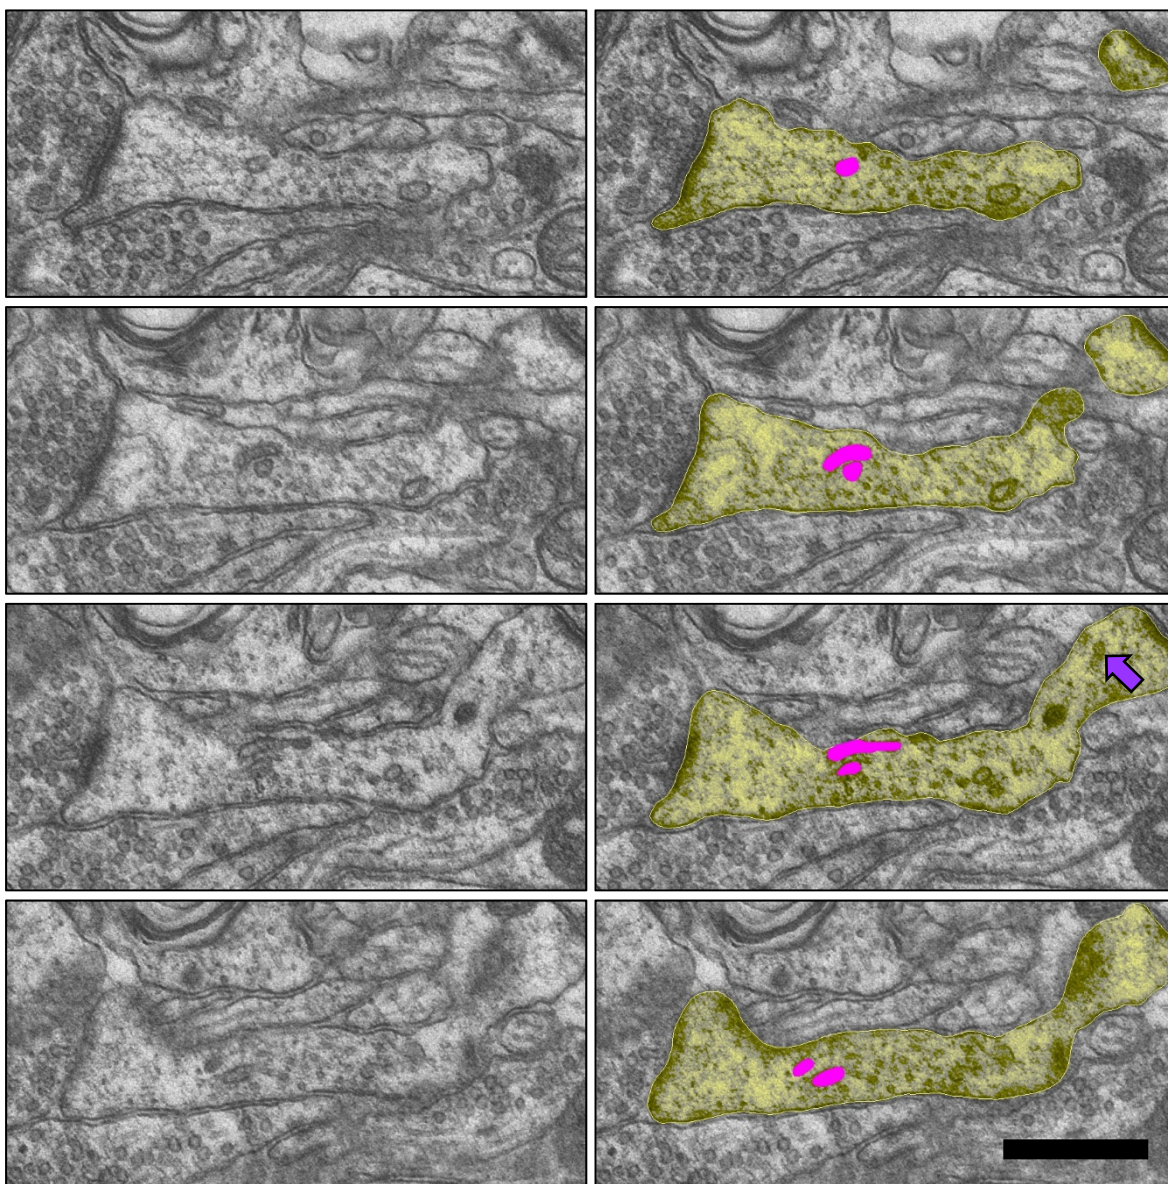

Figure 4 – figure supplement 1

Supplement: supp [file elife-46356-supp-v1.zip]

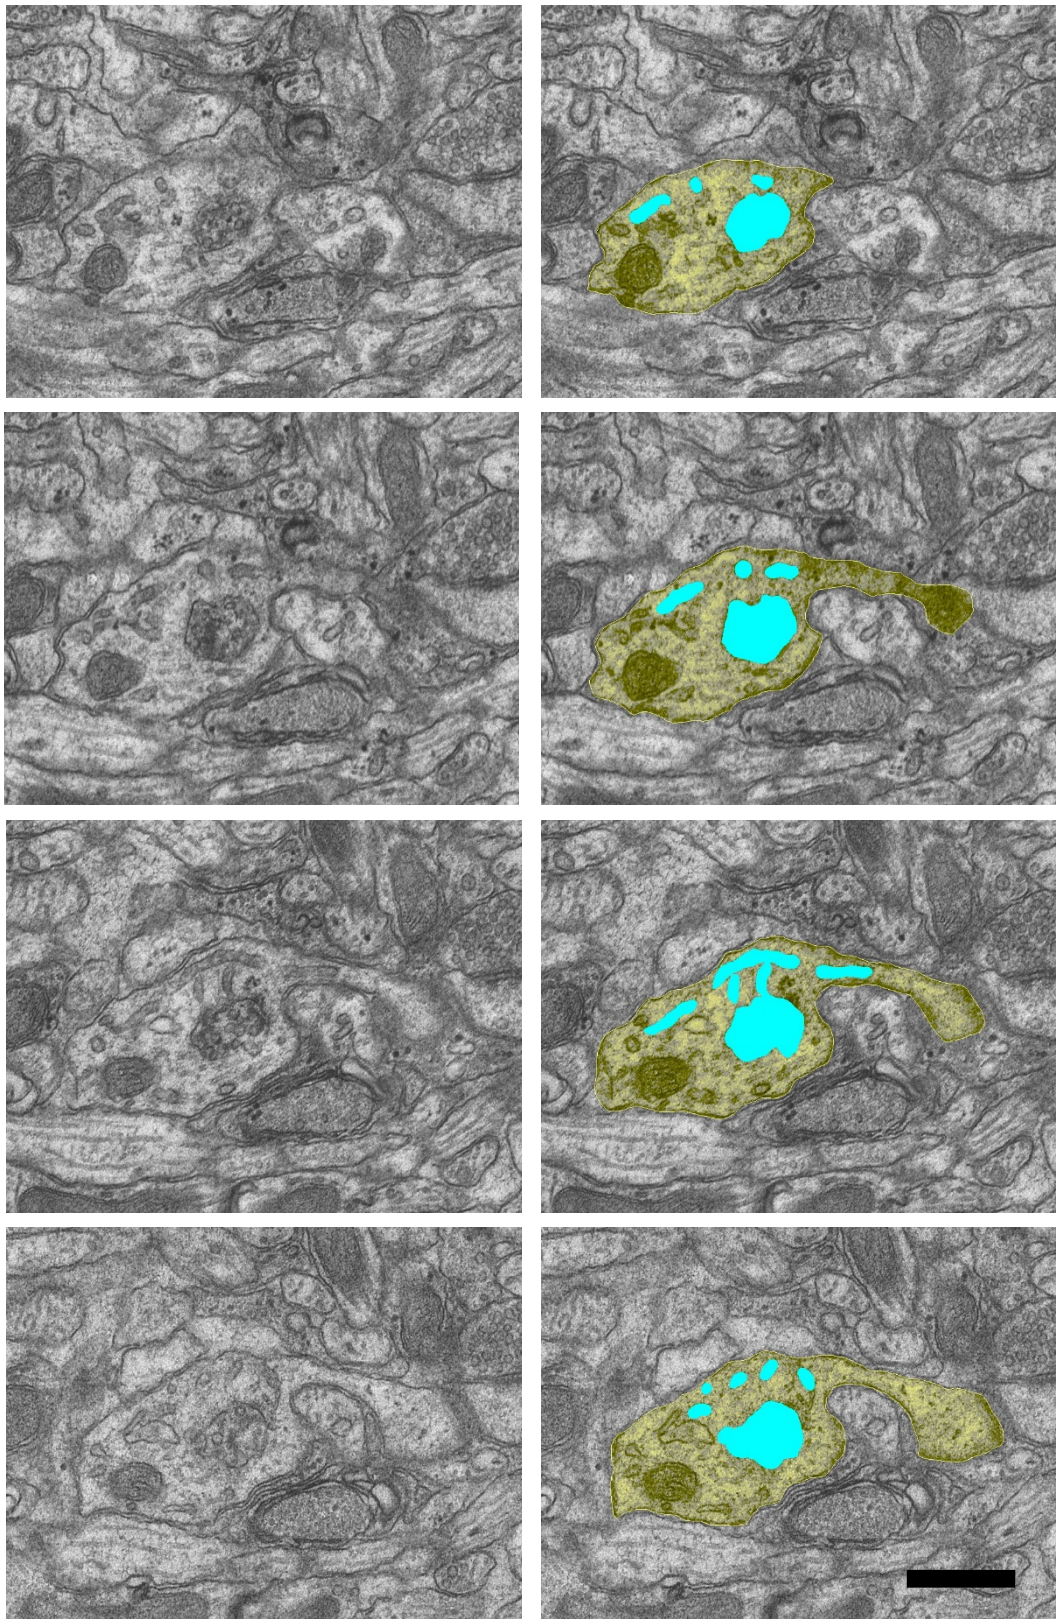

Figure 4 – figure supplement 3

Supplement: supp [file elife-46356-supp-v1.zip › elife_poa_e46356_Figure_4_figure_supplement_3.pdf]

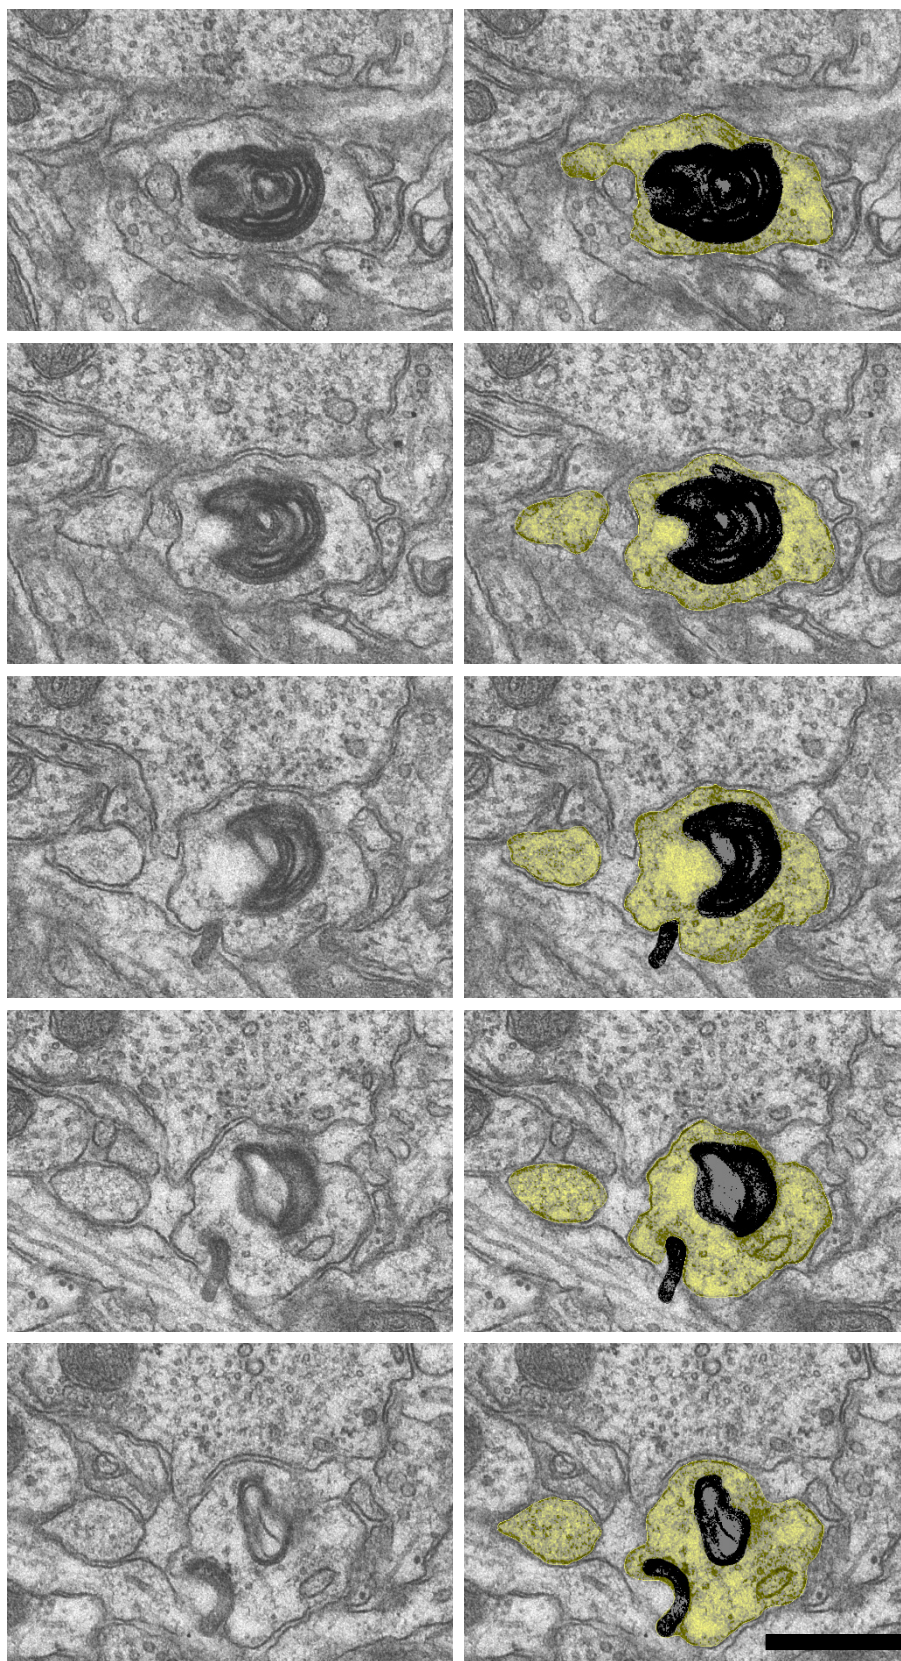

Figure 4 – figure supplement 6

Supplement: supp [file elife-46356-supp-v1.zip › elife_poa_e46356_Figure_4_figure_supplement_6.pdf]

CON

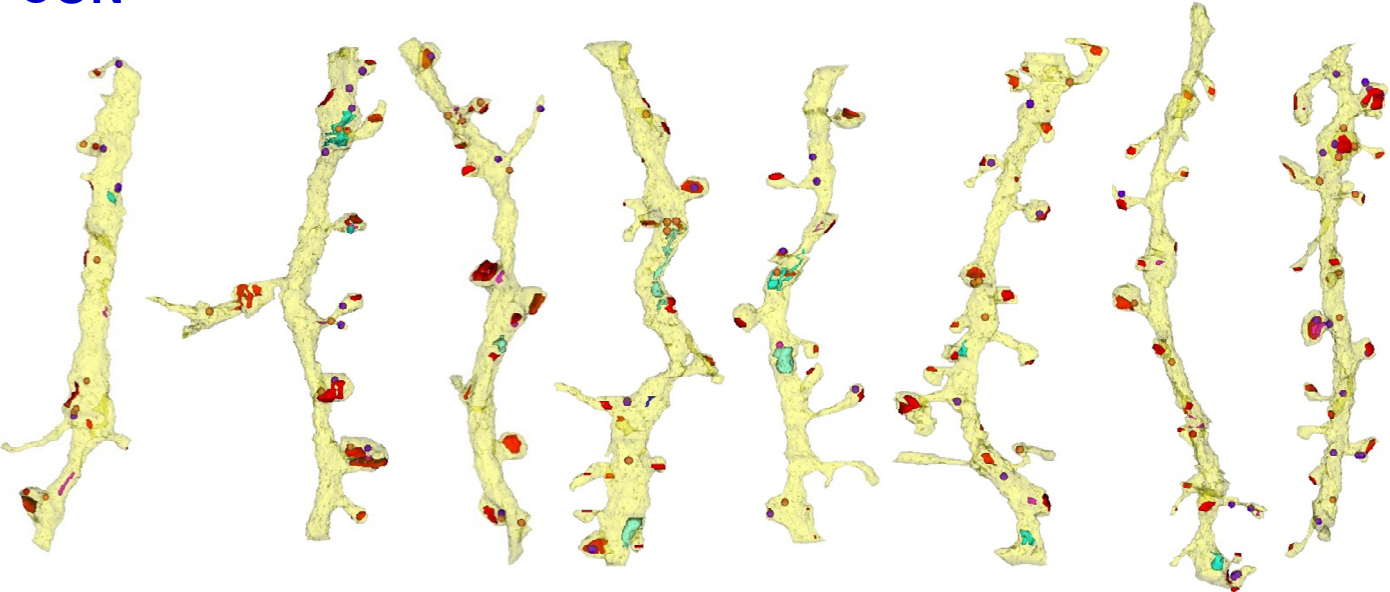

LTP

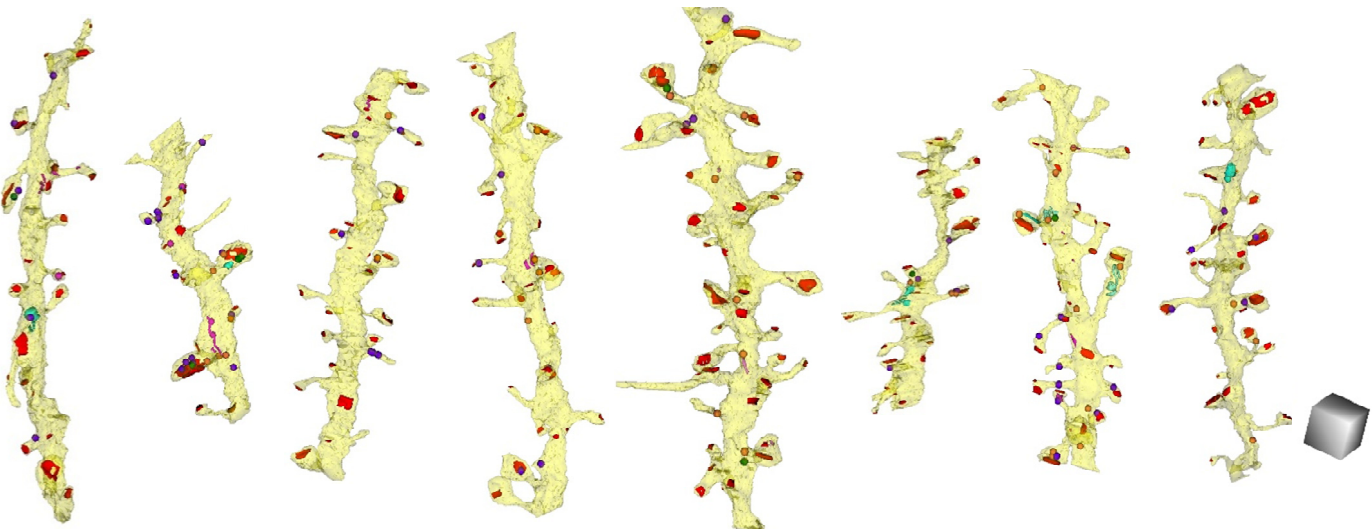

Figure 5 – figure supplement 1

Supplement: supp [file elife-46356-supp-v1.zip › elife_poa_e46356_Figure_5_figure_supplement_1.pdf]

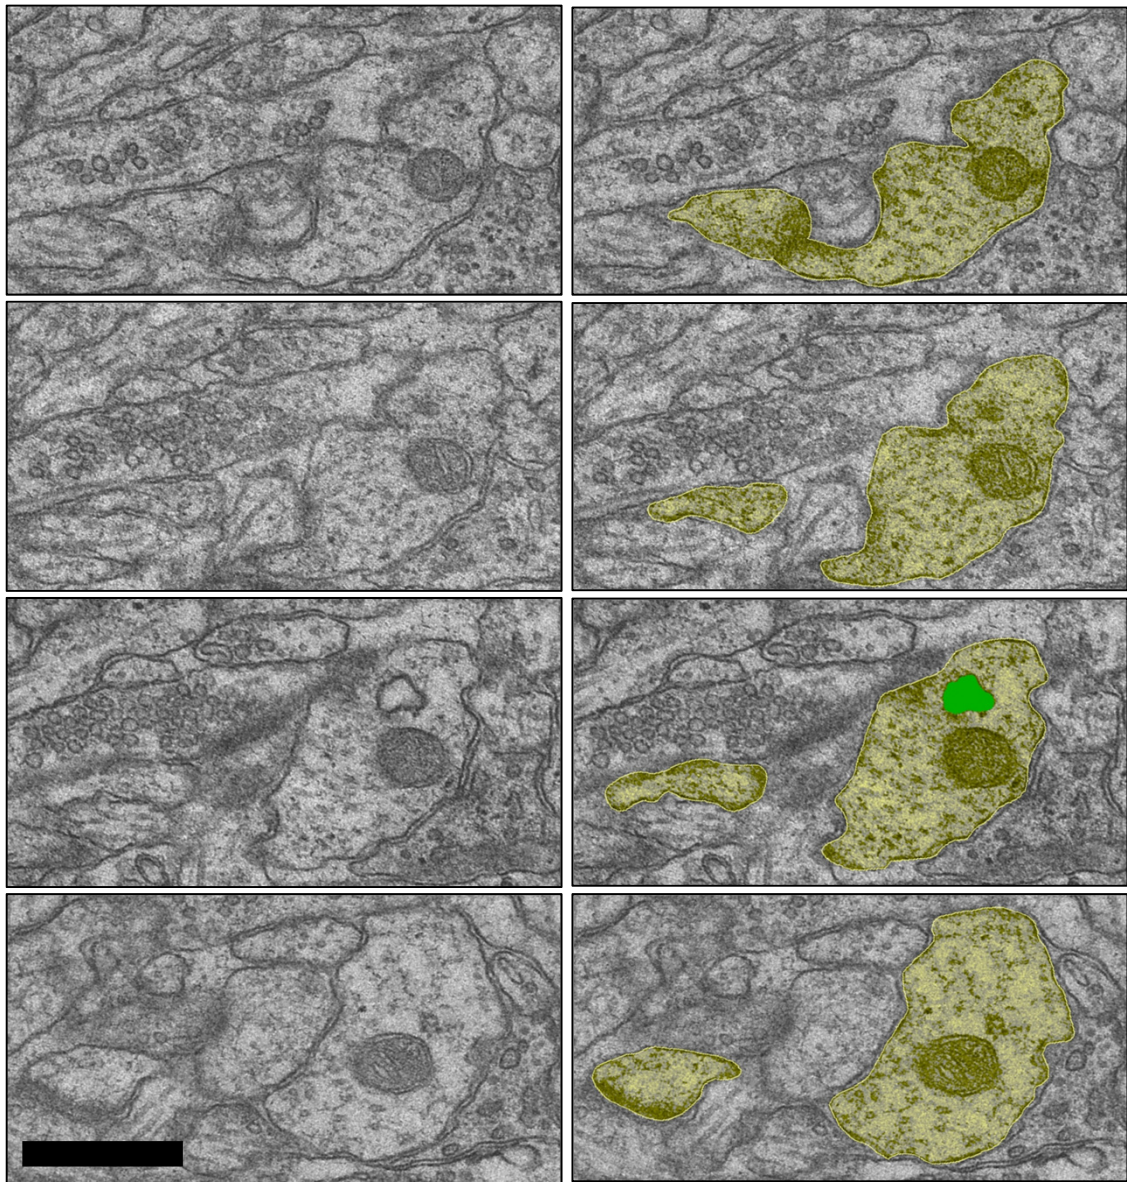

**Figure 4 – figure supplement 4**

Supplement: supp [file elife-46356-supp-v1.zip › elife_poa_e46356_Figure_4_figure_supplement_4.pdf]

**CON**

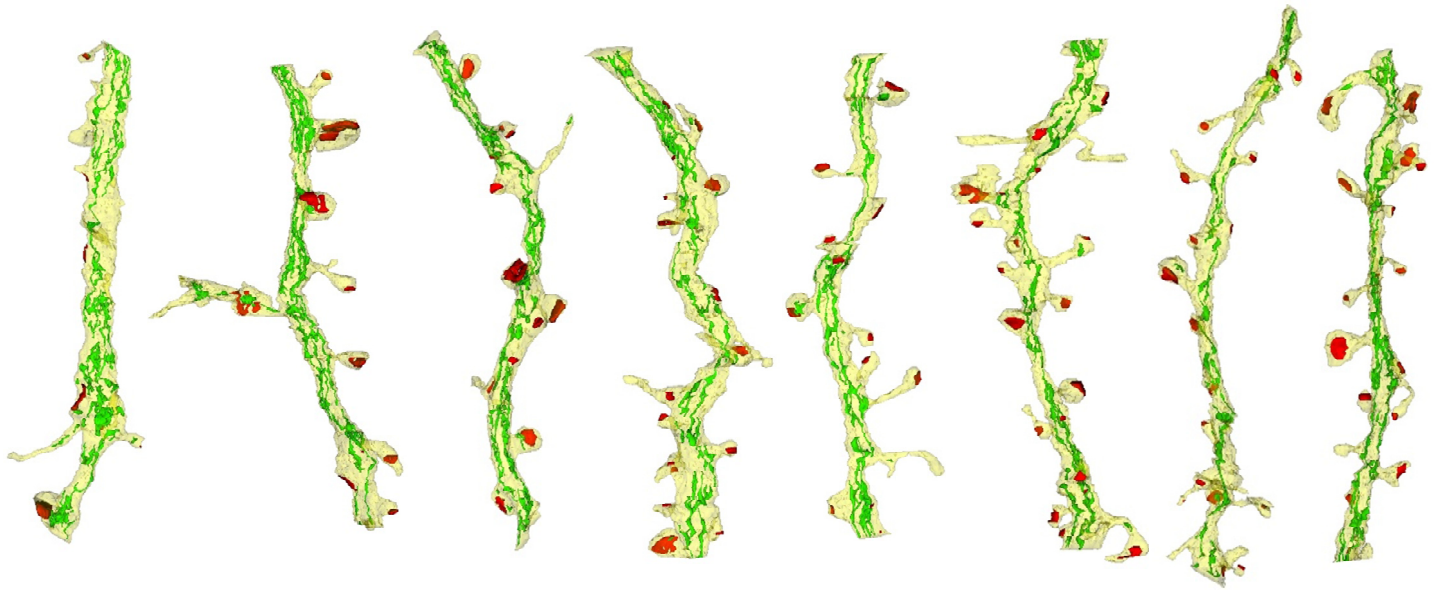

**LTP**

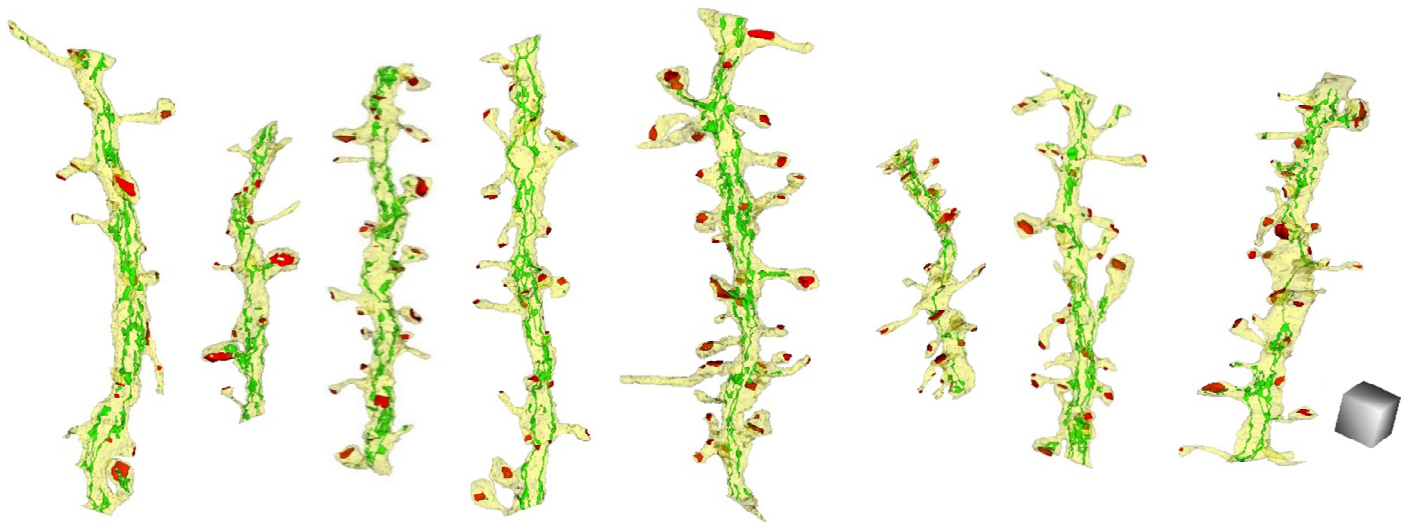

**Figure 2 – figure supplement 1**

Supplement: supp [file elife-46356-supp-v1.zip › elife_poa_e46356_Figure_2_figure_supplement_1.pdf]
